# Supplementary material for: Proteomic Response of Rat Pituitary Under Chronic Mild Stress Reveals Insights Into Vulnerability and Resistance to Anxiety or Depression
Source: Front Genet. 2021 Sep 17;12:751999. doi: 10.3389/fgene.2021.751999 (PMC8484759; doi:10.3389/fgene.2021.751999)
Supplement: Supplementary file 2 [file Table1.XLSX]

## Sheet: Dep-Sus
Uniprot accession	Protein description	Peptides	Unique peptides	119/113 ratio	121/114 ratio	119/113 ratio	121/114 ratio	Average ratio	P-value
F1LRC6	Nucleoporin 188 OS=Rattus norvegicus GN=Nup188 PE=1 SV=2	1	1	0.633803	0.739437	0.737705	0.860656	0.7429	0.00145424
Q6AYT0	Quinone oxidoreductase OS=Rattus norvegicus GN=Cryz PE=2 SV=1	1	1	0.776596	0.808511	0.784946	0.817204	0.796814	7.17891e-07
D4A414	COX15 cytochrome c oxidase assembly homolog OS=Rattus norvegicus GN=Cox15 PE=1 SV=1	1	1	0.865497	0.701754	0.783069	0.634921	0.74631	0.00226986
M0R7I0	Importin subunit alpha OS=Rattus norvegicus GN=LOC100359600 PE=3 SV=1	2	2	0.7	0.786364	0.846154	0.950549	0.820767	0.0144132
D4A4R1	Echinoderm microtubule-associated protein-like 3 OS=Rattus norvegicus GN=Eml3 PE=1 SV=2	1	1	1.272	1.512	1.08904	1.29452	1.29189	0.0150334
D3ZUL1	Coiled-coil domain-containing 124 OS=Rattus norvegicus GN=Ccdc124 PE=1 SV=1	2	2	0.825472	0.830189	0.813953	0.818605	0.822055	4.58509e-09
B2GV55	Ubiquitin-conjugating enzyme E2 Q1 OS=Rattus norvegicus GN=Ube2q1 PE=1 SV=1	1	1	1.11377	1.29341	1.36765	1.58824	1.34077	0.0133048
Q5M965	Probable tRNA(His) guanylyltransferase OS=Rattus norvegicus GN=Thg1l PE=2 SV=1	1	1	0.733591	0.891892	0.76	0.924	0.827371	0.0106986
Q5M969	N-acylneuraminate-9-phosphatase OS=Rattus norvegicus GN=Nanp PE=1 SV=1	1	1	1.15569	1.16766	1.23718	1.25	1.20263	0.000147761
D3ZTT7	Sad1 and UNC84 domain-containing 2 OS=Rattus norvegicus GN=Sun2 PE=1 SV=1	3	3	0.78626	0.78626	0.854772	0.854772	0.820516	0.000100455
D4A8E7	COMM domain-containing 6 OS=Rattus norvegicus GN=Commd6 PE=1 SV=1	1	1	0.784512	0.905724	0.761438	0.879085	0.83269	0.00315682
D3ZFY0	Selenophosphate synthetase 1 OS=Rattus norvegicus GN=Sephs1 PE=1 SV=1	2	2	0.730887	0.770642	0.766026	0.807692	0.768812	6.18255e-06
A0A0G2K867	Otoferlin OS=Rattus norvegicus GN=Otof PE=4 SV=1	1	1	0.785924	0.777126	0.861736	0.85209	0.819219	0.000172004
P84060	Dystrobrevin beta OS=Rattus norvegicus GN=Dtnb PE=1 SV=2	4	1	1.07317	1.27178	1.1711	1.38783	1.22597	0.0154519
B2GV06	Succinyl-CoA:3-ketoacid coenzyme A transferase 1, mitochondrial OS=Rattus norvegicus GN=Oxct1 PE=1 SV=1	1	1	0.788413	0.732997	0.765281	0.711491	0.749546	6.20892e-06
Q5XIB5	Coiled-coil domain-containing protein 86 OS=Rattus norvegicus GN=Ccdc86 PE=1 SV=1	1	1	0.801527	0.89313	0.715909	0.797727	0.802073	0.00156384
Q5U3Z0	UPF0769 protein C21orf59 homolog OS=Rattus norvegicus PE=1 SV=1	1	1	1.19259	1.15926	1.24324	1.20849	1.2009	2.57975e-05
Q9JK59	BAK protein OS=Rattus norvegicus GN=Bak1 PE=2 SV=1	1	1	0.219664	0.205352	0.710262	0.663984	0.449815	0.00707654
D3ZSV7	Similar to THUMP domain containing 3 (Predicted), isoform CRA_a OS=Rattus norvegicus GN=Thumpd3 PE=1 SV=1	1	1	1.14013	1.23885	1.23024	1.33677	1.2365	0.00106836
B0BN35	LOC687694 protein OS=Rattus norvegicus GN=Elp4 PE=2 SV=1	1	1	0.792123	0.726477	0.876513	0.803874	0.799747	0.000623402
D3Z8X6	Deltex E3 ubiquitin ligase 3L OS=Rattus norvegicus GN=Dtx3l PE=1 SV=1	2	2	0.518568	0.515915	0.749042	0.745211	0.632184	0.00145687
F1LVA9	Dedicator of cytokinesis 5 OS=Rattus norvegicus GN=Dock5 PE=1 SV=2	2	2	0.703571	0.894643	0.665541	0.846284	0.77751	0.00682801
Q5Y4N8	Adhesion G protein-coupled receptor E2 OS=Rattus norvegicus GN=Adgre1 PE=2 SV=1	1	1	1.74793	2.16942	1.57836	1.95896	1.86367	0.000521916
Q99MB4	COBW domain-containing protein 1 OS=Rattus norvegicus GN=Cbwd1 PE=2 SV=2	2	2	0.576613	0.672043	0.569721	0.664011	0.620597	8.96225e-06
F1LQ09	Atlastin GTPase 2 OS=Rattus norvegicus GN=Atl2 PE=1 SV=1	2	2	1.26012	1.33526	1.12082	1.18766	1.22596	0.00274103
D4A465	Late endosomal/lysosomal adaptor, MAPK and MTOR activator 2 OS=Rattus norvegicus GN=Lamtor2 PE=1 SV=1	2	2	1.15873	1.19841	1.42208	1.47078	1.3125	0.0072253
D4ADT5	DEAD (Asp-Glu-Ala-Asp) box polypeptide 58 (Predicted) OS=Rattus norvegicus GN=Ddx58 PE=1 SV=3	2	2	0.722689	0.680672	0.796296	0.75	0.737414	3.68081e-05
Q08849	Syntaxin-3 OS=Rattus norvegicus GN=Stx3 PE=1 SV=1	1	1	0.789322	0.860029	0.447993	0.488124	0.646367	0.0146515
D4A958	Coiled-coil domain-containing 54 OS=Rattus norvegicus GN=Ccdc54 PE=4 SV=1	1	1	0.846954	0.812779	0.815451	0.782546	0.814432	7.9408e-06
F1MAR6	Proline dehydrogenase OS=Rattus norvegicus GN=Prodh1 PE=1 SV=2	2	2	0.867792	0.83685	0.723329	0.697538	0.781377	0.00195121
A0A0H2UHF8	Alpha-1-acid glycoprotein OS=Rattus norvegicus GN=Orm1 PE=1 SV=1	1	1	1.74366	2.03944	1.57107	1.83756	1.79793	0.000180341
D3ZKX1	RCG48807, isoform CRA_a OS=Rattus norvegicus GN=Washc3 PE=1 SV=1	1	1	0.780702	0.68797	0.739027	0.651246	0.714736	5.66427e-05
P18614	Integrin alpha-1 OS=Rattus norvegicus GN=Itga1 PE=1 SV=1	2	2	0.84379	0.763124	0.860313	0.778068	0.811324	0.000221563
D4A5T8	Periplakin OS=Rattus norvegicus GN=Ppl PE=1 SV=1	3	3	0.774383	0.753231	0.771663	0.750585	0.762466	2.00072e-08
A0A0G2K9L0	Ribonuclease T2 OS=Rattus norvegicus GN=Rnaset2 PE=1 SV=1	1	1	0.634921	0.590103	0.895916	0.832675	0.738403	0.0125679
A0A0G2JWK7	Transgelin OS=Rattus norvegicus GN=Tagln PE=1 SV=1	2	2	1.17124	1.35541	1.08209	1.25224	1.21525	0.0101267
Q6TUH9	Corticosteroid 11-beta-dehydrogenase isozyme 1 OS=Rattus norvegicus GN=Hsd11b1 PE=1 SV=1	1	1	1.2813	1.21269	1.31053	1.24035	1.26122	1.9679e-05
Q99MG9	Kv channel-interacting protein 4 OS=Rattus norvegicus GN=Kcnip4 PE=1 SV=1	1	1	0.929193	0.904348	0.745763	0.725823	0.826281	0.0164141
Q27W01	RNA-binding protein 8A OS=Rattus norvegicus GN=Rbm8a PE=1 SV=1	1	1	1.26797	1.35294	1.15821	1.23582	1.25374	0.000748131
B3EY86	Lipocalin 11 OS=Rattus norvegicus GN=Lcn11 PE=2 SV=1	2	2	0.769577	0.80108	0.842365	0.876847	0.822467	0.000277003
D3ZVU6	AVL9 cell migration-associated OS=Rattus norvegicus GN=Avl9 PE=1 SV=1	1	1	1.21429	1.34314	1.0892	1.20477	1.21285	0.00635346
A0A0G2JSP8	Creatine kinase M-type OS=Rattus norvegicus GN=Ckm PE=1 SV=1	3	2	0.691473	0.893798	0.643115	0.831291	0.764919	0.00704032
B1WC70	Protein phosphatase 1, regulatory (Inhibitor) subunit 8 OS=Rattus norvegicus GN=Ppp1r8 PE=1 SV=1	2	2	1.22013	1.21745	1.22507	1.22237	1.22126	1.04166e-11
D4A2Z8	DEAH (Asp-Glu-Ala-His) box polypeptide 36 (Predicted), isoform CRA_a OS=Rattus norvegicus GN=Dhx36 PE=1 SV=1	4	4	0.719655	0.758027	0.830922	0.875226	0.795958	0.00113446
D3ZI42	Leucine-rich repeat and sterile alpha motif-containing 1 OS=Rattus norvegicus GN=Lrsam1 PE=1 SV=3	6	6	0.861595	0.911091	0.757454	0.800967	0.832777	0.00255646
P16296	Coagulation factor IX OS=Rattus norvegicus GN=F9 PE=2 SV=2	1	1	1.35176	1.28015	1.25701	1.19042	1.26983	0.000188794
B0BMX3	S100 calcium binding protein A16 (Predicted), isoform CRA_a OS=Rattus norvegicus GN=S100a16 PE=1 SV=1	1	1	1.87205	1.5	1.77352	1.42105	1.64166	0.00100112
D4A4W6	RCG20695, isoform CRA_b OS=Rattus norvegicus GN=Slirp PE=1 SV=1	1	1	1.10624	1.25629	1.14355	1.29865	1.20118	0.00447582
D3ZGM5	Coiled-coil domain-containing 167 OS=Rattus norvegicus GN=Ccdc167 PE=1 SV=1	1	1	1.23045	1.22325	1.26427	1.25687	1.24371	3.06255e-07
B0BN56	28S ribosomal protein S31, mitochondrial OS=Rattus norvegicus GN=Mrps31 PE=2 SV=1	2	2	0.856334	0.764331	0.803453	0.717131	0.785312	0.000344382
Q06000	Lipoprotein lipase OS=Rattus norvegicus GN=Lpl PE=1 SV=1	2	2	1.14945	1.37269	1.07972	1.28943	1.22282	0.0152207
A1L1L2	Transmembrane protein 214 OS=Rattus norvegicus GN=Tmem214 PE=2 SV=1	2	2	1.09588	1.24054	1.16443	1.31814	1.20475	0.00527472
A0A0G2JWR2	Protein kinase C and casein kinase substrate in neurons protein 1 OS=Rattus norvegicus GN=Pacsin1 PE=1 SV=1	2	2	0.806678	0.764499	0.756178	0.716639	0.760999	1.3073e-05
D3ZVR7	Prostamide/prostaglandin F synthase OS=Rattus norvegicus GN=Fam213b PE=3 SV=1	3	3	1.28961	1.29842	1.19397	1.20212	1.24603	0.00011601
P04916	Retinol-binding protein 4 OS=Rattus norvegicus GN=Rbp4 PE=1 SV=1	1	1	0.805161	0.713007	0.95742	0.84784	0.830857	0.0156966
A0A140TAC3	Epsin-1 OS=Rattus norvegicus GN=Epn1 PE=1 SV=1	1	1	0.799496	0.743073	0.923749	0.858556	0.831219	0.00483489
M0RAY0	tRNA-dihydrouridine(47) synthase [NAD(P)(+)] OS=Rattus norvegicus GN=Dus3l PE=1 SV=1	1	1	1.64551	1.30833	1.50188	1.19413	1.41246	0.00628199
F1M3W5	Dmx-like 2 OS=Rattus norvegicus GN=Dmxl2 PE=1 SV=3	4	4	0.691335	0.719798	0.885737	0.922204	0.804768	0.0151677
A0A0G2K1G0	BCL2-associated transcription factor 1 OS=Rattus norvegicus GN=Bclaf1 PE=1 SV=1	4	4	1.1999	1.34899	1.14449	1.28669	1.24502	0.00166099
A0A0G2K9B1	Serine protease inhibitor OS=Rattus norvegicus GN=LOC299282 PE=1 SV=1	6	4	1.25932	1.26756	1.18001	1.18773	1.22366	6.93876e-05
D4A3E8	Mitochondrial ribosomal protein S27 OS=Rattus norvegicus GN=Mrps27 PE=1 SV=1	3	3	0.843182	0.804261	0.849456	0.810246	0.826786	5.1687e-06
Q5EBC0	Inter alpha-trypsin inhibitor, heavy chain 4 OS=Rattus norvegicus GN=Itih4 PE=1 SV=1	9	9	1.25993	1.34077	1.07341	1.14228	1.2041	0.0141156
A0A0G2JVQ5	Kininogen 1 OS=Rattus norvegicus GN=Kng1 PE=1 SV=1	6	2	1.69576	2.40127	1.55063	2.19576	1.96085	0.00310668
Q5PQU1	Kininogen 1 OS=Rattus norvegicus GN=Kng2 PE=2 SV=1	5	3	1.99269	2.32716	1.86111	2.1735	2.08861	4.01139e-05
A0A0G2K926	Alpha-1-inhibitor III OS=Rattus norvegicus GN=LOC297568 PE=1 SV=1	16	6	0.890416	0.792921	0.74218	0.660915	0.771608	0.00314354
P06866-2	Isoform 2 of Haptoglobin OS=Rattus norvegicus GN=Hp	7	7	1.69224	1.55228	1.44287	1.32354	1.50273	0.000686133
P14669	Annexin A3 OS=Rattus norvegicus GN=Anxa3 PE=1 SV=4	11	10	1.22259	1.34295	1.12234	1.23282	1.23018	0.0022142
Q5U362	Annexin OS=Rattus norvegicus GN=Anxa4 PE=1 SV=1	10	10	1.26189	1.32238	1.14709	1.20207	1.23335	0.000831968
P20059	Hemopexin OS=Rattus norvegicus GN=Hpx PE=1 SV=3	11	11	1.36614	1.40499	1.19332	1.22726	1.29793	0.00118846
Q66HD2	Kelch-like protein 36 OS=Rattus norvegicus GN=Klhl36 PE=2 SV=1	1	1	0.590909	1.05195	1.10976	1.97561	1.18206	0.55177
G3V602	Xenotropic and polytropic retrovirus receptor 1 OS=Rattus norvegicus GN=Xpr1 PE=1 SV=1	1	1	0.532164	0.859649	0.957895	1.54737	0.974269	0.907186
M0R5P8	ADAM metallopeptidase domain 22 OS=Rattus norvegicus GN=Adam22 PE=1 SV=2	1	1	0.676647	0.886228	1.0367	1.3578	0.989342	0.943131
B1WC44	60S ribosomal export protein NMD3 OS=Rattus norvegicus GN=Nmd3 PE=2 SV=1	2	2	0.763514	1.07432	0.882812	1.24219	0.990709	0.932675
B2GV41	Ubiquitin specific protease 39 (Predicted), isoform CRA_b OS=Rattus norvegicus GN=Usp39 PE=1 SV=1	2	2	0.795775	1.26056	0.753333	1.19333	1.00075	0.995631
B2GV97	O-phosphoseryl-tRNA(Sec) selenium transferase OS=Rattus norvegicus GN=Sepsecs PE=1 SV=1	3	3	0.883562	1.17808	0.781818	1.04242	0.971472	0.754881
G3V9L7	Glycerophosphodiester phosphodiesterase domain-containing 5 OS=Rattus norvegicus GN=Gdpd5 PE=4 SV=2	1	1	0.684211	1.07895	0.751445	1.18497	0.924894	0.561577
P11275	Calcium/calmodulin-dependent protein kinase type II subunit alpha OS=Rattus norvegicus GN=Camk2a PE=1 SV=1	2	1	0.949275	0.992754	1.03968	1.0873	1.01725	0.583238
D4A857	Importin 9 OS=Rattus norvegicus GN=Ipo9 PE=1 SV=2	1	1	0.79878	1.03049	0.63285	0.816425	0.819636	0.0689657
P47727	Carbonyl reductase [NADPH] 1 OS=Rattus norvegicus GN=Cbr1 PE=1 SV=2	12	1	0.857143	1.27273	0.733333	1.08889	0.988023	0.923842
Q5FVH4	AKT-interacting protein OS=Rattus norvegicus GN=Aktip PE=1 SV=1	1	1	0.95	1.04286	0.764368	0.83908	0.899076	0.150479
P19332-3	Isoform Tau-C of Microtubule-associated protein tau OS=Rattus norvegicus GN=Mapt	6	1	0.913333	1.02667	0.861635	0.968553	0.942547	0.157047
F1M4W7	Cleavage stimulation factor subunit 3 OS=Rattus norvegicus GN=Cstf3 PE=1 SV=3	2	2	0.80117	1.08772	0.787356	1.06897	0.936303	0.467537
D3ZUT8	Protein NDRG4 OS=Rattus norvegicus GN=Ndrg4 PE=1 SV=1	2	2	0.873494	0.909639	0.810056	0.843575	0.859191	0.000566273
D4A629	Protein-L-isoaspartate (D-aspartate) O-methyltransferase domain-containing 1 OS=Rattus norvegicus GN=Pcmtd1 PE=1 SV=1	2	2	1.47475	1.21212	1.18699	0.97561	1.21237	0.0831621
F7F0Y6	Cytochrome P450, family 4, subfamily f, polypeptide 37 OS=Rattus norvegicus GN=Cyp4f37 PE=3 SV=2	1	1	0.787234	1	0.948718	1.20513	0.98527	0.869894
Q62829	Serine/threonine-protein kinase PAK 3 OS=Rattus norvegicus GN=Pak3 PE=1 SV=1	7	1	0.763819	1.05025	0.835165	1.14835	0.949397	0.594385
Q4V7C1	FGFR1 oncogene partner OS=Rattus norvegicus GN=Fgfr1op PE=1 SV=1	1	1	0.842391	1.06522	0.901163	1.13953	0.987077	0.858252
F1M6E2	Rho GTPase-activating protein 36 OS=Rattus norvegicus GN=Arhgap36 PE=4 SV=2	2	2	0.787879	1.12626	0.772277	1.10396	0.947595	0.608021
Q3MIB4	Lon protease homolog 2, peroxisomal OS=Rattus norvegicus GN=Lonp2 PE=1 SV=2	2	2	1.29508	1.0082	1.37391	1.06957	1.18669	0.0774487
B1WBU3	PCOLCE2 protein OS=Rattus norvegicus GN=PCOLCE2 PE=2 SV=1	1	1	0.780488	0.921951	1.26984	1.5	1.11807	0.497724
F1LMX1	Myc box-dependent-interacting protein 1 OS=Rattus norvegicus GN=Bin1 PE=1 SV=2	2	2	0.879121	0.906593	1.05263	1.08553	0.980968	0.725004
Q156J1	Bcl-2-interacting death suppressor OS=Rattus norvegicus PE=2 SV=1	3	3	1.1338	1.21831	0.952663	1.02367	1.08211	0.211599
D3ZZQ6	Integrator complex subunit 4 OS=Rattus norvegicus GN=Ints4 PE=1 SV=1	4	4	0.925714	0.931429	1.08725	1.09396	1.00959	0.844481
Q5XIS7	Ubiquitin-associated protein 1 OS=Rattus norvegicus GN=Ubap1 PE=2 SV=1	1	1	0.88172	1.05376	1.03797	1.24051	1.05349	0.493822
Q5RJK9	Polymerase (RNA) I polypeptide C OS=Rattus norvegicus GN=Polr1c PE=1 SV=1	1	1	0.877005	0.957219	1.00613	1.09816	0.98463	0.751023
F1LMA5	Friend virus susceptibility 1 OS=Rattus norvegicus GN=Fv1 PE=4 SV=1	2	2	0.625468	0.883895	0.692946	0.979253	0.795391	0.0471419
D4ACM2	MAD2 (Mitotic arrest deficient, homolog)-like 1 (Yeast) (Predicted), isoform CRA_a OS=Rattus norvegicus GN=Mad2l1 PE=1 SV=1	2	2	1.17361	1.16667	0.8125	0.807692	0.990118	0.927355
O89035	Mitochondrial dicarboxylate carrier OS=Rattus norvegicus GN=Slc25a10 PE=1 SV=1	1	1	0.833333	1.03922	0.813397	1.01435	0.925075	0.251723
Q66H20-2	Isoform 2 of Polypyrimidine tract-binding protein 2 OS=Rattus norvegicus GN=Ptbp2	2	1	1.17123	1.09589	1.10323	1.03226	1.10065	0.0121856
G3V709	Nicotinate phosphoribosyltransferase OS=Rattus norvegicus GN=Naprt PE=1 SV=1	1	1	0.925532	0.87234	1.09434	1.03145	0.980915	0.717051
D4A3M7	BSD domain-containing 1 OS=Rattus norvegicus GN=Bsdc1 PE=1 SV=3	2	2	0.82243	0.869159	1.04142	1.10059	0.9584	0.556417
D4A401	Testis expressed gene 10 (Predicted) OS=Rattus norvegicus GN=Tex10 PE=1 SV=2	1	1	0.715447	0.99187	0.755365	1.04721	0.877473	0.191246
Q6P6S0	Synaptosomal-associated protein 47 OS=Rattus norvegicus GN=Snap47 PE=2 SV=1	2	1	0.886139	0.990099	1.02874	1.14943	1.0136	0.810838
Q5XIB2	Peptidyl-prolyl cis-trans isomerase CWC27 homolog OS=Rattus norvegicus GN=Cwc27 PE=1 SV=1	2	2	0.962963	1.06349	1.10303	1.21818	1.08692	0.150574
D4A7I6	Similar to CG13957-PA OS=Rattus norvegicus GN=Washc4 PE=1 SV=1	2	2	0.86758	1.00457	0.855856	0.990991	0.929748	0.125223
A0A0G2JVG4	Peroxisomal trans-2-enoyl-CoA reductase OS=Rattus norvegicus GN=Pecr PE=1 SV=1	2	2	0.87156	0.926606	0.840708	0.893805	0.88317	0.000658026
Q5XFW6	WD repeat-containing protein 6 OS=Rattus norvegicus GN=Wdr6 PE=1 SV=2	1	1	0.892019	1.07981	0.688406	0.833333	0.873393	0.169182
C0IXW5	Furry-like protein OS=Rattus norvegicus GN=Fry PE=2 SV=1	1	1	0.98995	1.09045	0.763566	0.841085	0.921263	0.324602
Q6P686	Osteoclast-stimulating factor 1 OS=Rattus norvegicus GN=Ostf1 PE=1 SV=1	2	2	0.864629	1.03493	0.912442	1.09217	0.976043	0.665771
G3V6B8	RCG38965, isoform CRA_a OS=Rattus norvegicus GN=Tsr2 PE=1 SV=1	2	2	0.908257	1.20183	0.86087	1.13913	1.02752	0.754536
D4A2B0	DNA polymerase delta-interacting protein 3 OS=Rattus norvegicus GN=Poldip3 PE=1 SV=1	1	1	0.880531	0.90708	1.22086	1.25767	1.06653	0.531173
B1WBV1	Axin interactor, dorsalization-associated OS=Rattus norvegicus GN=Aida PE=1 SV=1	1	1	0.815574	1.65574	0.756654	1.53612	1.19102	0.447992
Q5XID1	Anamorsin OS=Rattus norvegicus GN=Ciapin1 PE=1 SV=1	3	3	0.673333	1.01333	0.713781	1.0742	0.868663	0.246102
Q5U204	Ragulator complex protein LAMTOR3 OS=Rattus norvegicus GN=Lamtor3 PE=2 SV=1	2	2	0.618182	0.915152	0.731183	1.08244	0.836738	0.161398
D4A2D8	LSM7 homolog, U6 small nuclear RNA and mRNA degradation-associated OS=Rattus norvegicus GN=Lsm7 PE=1 SV=1	3	3	1.01961	1.56863	0.892704	1.37339	1.21358	0.220105
A0A0G2JYI7	Ubiquitin-associated protein 2 OS=Rattus norvegicus GN=Ubap2 PE=1 SV=1	2	2	1.07921	1.18317	1.10101	1.20707	1.14261	0.00370458
F1M8S4	Ubiquitin-specific peptidase 35 OS=Rattus norvegicus GN=Usp35 PE=1 SV=2	2	2	0.973451	1.06637	0.920502	1.00837	0.992173	0.806824
A0A0G2K189	Secernin 3 OS=Rattus norvegicus GN=Scrn3 PE=1 SV=1	1	1	0.948498	0.974249	1.13918	1.1701	1.05801	0.343329
G3V9E7	LIM homeobox 3 OS=Rattus norvegicus GN=Lhx3 PE=4 SV=1	1	1	0.818519	1.31481	0.762069	1.22414	1.02989	0.838074
B2RZB8	Proteasome assembly chaperone 4 OS=Rattus norvegicus GN=Psmg4 PE=2 SV=1	1	1	1.08057	1.09479	1.03167	1.04525	1.06307	0.00525113
P04177	Tyrosine 3-monooxygenase OS=Rattus norvegicus GN=Th PE=1 SV=3	2	2	0.57868	0.977157	0.74026	1.25	0.886524	0.467131
Q6AY46	tRNA (adenine(58)-N(1))-methyltransferase catalytic subunit TRMT61A OS=Rattus norvegicus GN=Trmt61a PE=2 SV=1	1	1	0.898438	0.964844	0.784983	0.843003	0.872817	0.0162278
D4AE75	POP1 homolog, ribonuclease P/MRP subunit OS=Rattus norvegicus GN=Pop1 PE=1 SV=1	1	1	0.966527	1.07531	0.881679	0.980916	0.976109	0.568949
D3ZAG3	Microtubule-associated protein 9 OS=Rattus norvegicus GN=Map9 PE=1 SV=1	1	1	0.991416	1.29614	0.846154	1.10623	1.05998	0.551112
B2RYI8	Papss1 protein OS=Rattus norvegicus GN=Papss1 PE=2 SV=1	3	3	0.731861	0.911672	0.822695	1.02482	0.872763	0.0882753
F1M3P6	Protein SCAI OS=Rattus norvegicus GN=Scai PE=1 SV=2	3	3	0.844203	1.20652	0.89272	1.27586	1.05483	0.632819
F1M6V0	Neurobeachin-like 1 OS=Rattus norvegicus GN=Nbeal1 PE=1 SV=3	1	1	0.971193	0.954733	1.15122	1.13171	1.05221	0.352298
F1M9B2	Insulin-like growth factor binding protein 7, isoform CRA_b OS=Rattus norvegicus GN=Igfbp7 PE=1 SV=2	1	1	1.03057	0.820961	1.02609	0.817391	0.923752	0.253572
F1LSM0	Ubiquitin-specific peptidase 24 OS=Rattus norvegicus GN=Usp24 PE=1 SV=2	1	1	1.06787	1.03167	0.971193	0.938272	1.00225	0.940998
O35165	Golgi SNAP receptor complex member 2 OS=Rattus norvegicus GN=Gosr2 PE=1 SV=2	1	1	0.979253	1.24066	0.758842	0.961415	0.985044	0.884619
A0A0G2JTJ9	RCG50655 OS=Rattus norvegicus GN=Tfcp2 PE=1 SV=1	1	1	1.88095	2.04762	1.05804	1.15179	1.5346	0.0773426
B2RZ97	LOC684322 protein OS=Rattus norvegicus GN=Kcmf1 PE=2 SV=1	2	2	1.07727	0.95	0.908046	0.800766	0.934021	0.292284
Q63356	Unconventional myosin-Ie OS=Rattus norvegicus GN=Myo1e PE=1 SV=1	3	3	0.773463	0.834951	0.844523	0.911661	0.841149	0.00136158
F1M9V3	Similar to Alpha enolase (2-phospho-D-glycerate hydro-lyase) OS=Rattus norvegicus GN=RGD1559534 PE=4 SV=1	2	1	0.940945	1.18504	0.832753	1.04878	1.00188	0.980901
A0A0G2JTD1	Regulation of nuclear pre-mRNA domain-containing 2 OS=Rattus norvegicus GN=Rprd2 PE=1 SV=1	2	2	0.636605	0.93634	0.909091	1.33712	0.954789	0.764639
F1M801	Anaphase promoting complex subunit 1 (Predicted) OS=Rattus norvegicus GN=Anapc1 PE=1 SV=2	4	4	0.752351	1.03448	0.784314	1.07843	0.912395	0.336699
G3V818	Alpha-parvin OS=Rattus norvegicus GN=Parva PE=1 SV=1	3	2	1.125	1.80556	1.08482	1.74107	1.43911	0.0638033
Q68FQ2	Junctional adhesion molecule C OS=Rattus norvegicus GN=Jam3 PE=1 SV=1	1	1	0.853659	0.961672	1.0041	1.13115	0.987644	0.836603
Q6QI88	LRRG00120 OS=Rattus norvegicus GN=Tmed5 PE=1 SV=1	1	1	0.933579	1.30996	1.05858	1.48536	1.19687	0.163414
D4A333	Tetratricopeptide repeat domain 21B OS=Rattus norvegicus GN=Ttc21b PE=4 SV=3	2	2	1.09957	1.25974	0.954887	1.09398	1.10204	0.152613
F1LST0	HEAT repeat-containing 5B OS=Rattus norvegicus GN=Heatr5b PE=1 SV=2	2	2	0.821656	1.02866	0.829582	1.03859	0.929621	0.285998
Q05BA4	Myadm protein OS=Rattus norvegicus GN=Myadm PE=1 SV=1	2	2	1.00778	1.1284	0.846405	0.947712	0.982576	0.777412
D3ZWX4	NCK-interacting protein with SH3 domain OS=Rattus norvegicus GN=Nckipsd PE=1 SV=3	2	2	1.07884	1.05809	1.06122	1.04082	1.05974	0.00025658
Q6P796	Serine peptidase inhibitor, Kunitz type, 2 OS=Rattus norvegicus GN=Spint2 PE=1 SV=1	1	1	1.0875	1.075	1.07407	1.06173	1.07458	7.72766e-06
O35254	Golgi reassembly-stacking protein 1 OS=Rattus norvegicus GN=Gorasp1 PE=1 SV=4	1	1	0.915789	1.01404	1.02756	1.1378	1.02379	0.619244
F1LZW6	Solute carrier family 25 member 13 OS=Rattus norvegicus GN=Slc25a13 PE=1 SV=2	7	4	0.774481	0.771513	0.966667	0.962963	0.868906	0.0557402
B5DF29	Replication factor C (Activator 1) 5 OS=Rattus norvegicus GN=Rfc5 PE=1 SV=1	1	1	0.97026	1.12268	0.928826	1.07473	1.02412	0.610872
P51792	H(+)/Cl(-) exchange transporter 3 OS=Rattus norvegicus GN=Clcn3 PE=2 SV=2	3	3	0.984962	1.20301	0.721763	0.881543	0.947819	0.623307
M0R919	Prefoldin subunit 3 OS=Rattus norvegicus GN=Vbp1 PE=1 SV=2	2	2	0.786787	1.33333	0.685864	1.1623	0.992072	0.960387
A0A0G2K681	CAP-Gly domain-containing linker protein 1 OS=Rattus norvegicus GN=Clip1 PE=1 SV=1	4	2	1.03137	1.17255	1.02734	1.16797	1.09981	0.0496096
B0K030	DnaJ (Hsp40) homolog, subfamily B, member 1 (Predicted), isoform CRA_b OS=Rattus norvegicus GN=Dnajb1 PE=1 SV=1	2	2	1.11915	1.28085	0.91958	1.05245	1.09301	0.261839
P61227	Ras-related protein Rap-2b OS=Rattus norvegicus GN=Rap2b PE=2 SV=1	2	2	0.741573	0.884831	1	1.19318	0.954897	0.6531
B5DEF3	Gamma-glutamyl carboxylase OS=Rattus norvegicus GN=Ggcx PE=1 SV=1	1	1	1.11864	1.29237	0.967033	1.11722	1.12382	0.111916
B1WBZ7	GPN-loop GTPase 1 OS=Rattus norvegicus GN=Gpn1 PE=1 SV=1	1	1	0.901024	1.11945	0.859935	1.0684	0.987204	0.84589
A0A0G2K132	Formin-like 2 OS=Rattus norvegicus GN=Fmnl2 PE=1 SV=1	2	2	1.35714	1.05102	1.06827	0.827309	1.07594	0.510655
Q6AXX4	Something about silencing protein 10 OS=Rattus norvegicus GN=Utp3 PE=1 SV=1	1	1	0.933333	0.849123	0.953405	0.867384	0.900811	0.00764195
A0A0G2K714	Endophilin-B1 OS=Rattus norvegicus GN=Sh3glb1 PE=1 SV=1	4	3	0.833856	0.987461	0.858065	1.01613	0.923878	0.146331
Q9EPT8	Chloride intracellular channel protein 5 OS=Rattus norvegicus GN=Clic5 PE=1 SV=1	2	1	0.963768	1.20652	0.844444	1.05714	1.01797	0.821989
D3ZC55	Heat shock 70kDa protein 12A (Predicted), isoform CRA_a OS=Rattus norvegicus GN=Hspa12a PE=1 SV=1	4	4	0.816514	1.11315	0.708223	0.965517	0.900851	0.30419
Q80WK7	Equilibrative nucleoside transporter 3 OS=Rattus norvegicus GN=Slc29a3 PE=1 SV=2	1	1	1.41799	1.25397	1.15021	1.01717	1.20983	0.047846
A0A0G2K429	Adenylate cyclase 6, isoform CRA_a OS=Rattus norvegicus GN=Adcy6 PE=1 SV=1	1	1	0.944251	1.07666	0.79941	0.911504	0.932955	0.284521
G3V8W9	Similar to CG12279-PA OS=Rattus norvegicus GN=Tstd3 PE=1 SV=1	1	1	0.951049	1.00699	0.84472	0.89441	0.924293	0.0743641
Q99P74	Ras-related protein Rab-27B OS=Rattus norvegicus GN=Rab27b PE=2 SV=3	4	2	0.723684	0.786842	0.932203	1.01356	0.864072	0.0860179
Q5D006	Ubiquitin carboxyl-terminal hydrolase 11 OS=Rattus norvegicus GN=Usp11 PE=1 SV=1	4	4	0.916667	0.986667	0.895765	0.964169	0.940817	0.0300885
D3Z9K4	Pleckstrin homology domain-containing O2 OS=Rattus norvegicus GN=Plekho2 PE=1 SV=2	1	1	1.07812	1.23438	1.5	1.71739	1.38247	0.0355082
Q7M0E7	39S ribosomal protein L14, mitochondrial OS=Rattus norvegicus GN=Mrpl14 PE=1 SV=2	1	1	0.836364	1.00909	0.768802	0.927577	0.885458	0.0718976
A0A0G2K0I1	Spermatogenesis-associated 5 OS=Rattus norvegicus GN=Spata5 PE=1 SV=1	1	1	1.05515	1.00368	1.05128	1	1.02753	0.11363
Q6QZQ4	Vimentin-type intermediate filament-associated coiled-coil protein OS=Rattus norvegicus GN=Vmac PE=2 SV=1	3	3	0.873529	0.894118	0.919505	0.941176	0.907082	0.00074575
Q6AY55	Dephospho-CoA kinase domain-containing protein OS=Rattus norvegicus GN=Dcakd PE=2 SV=1	1	1	0.863372	1.10174	0.787798	1.00531	0.939555	0.423489
G3V846	Amino acid transporter OS=Rattus norvegicus GN=Slc1a3 PE=1 SV=1	3	3	0.940063	1.18297	1.02759	1.2931	1.11093	0.208863
Q9EQZ1	TSC22 domain family protein 3 OS=Rattus norvegicus GN=Tsc22d3 PE=1 SV=1	1	1	0.909366	0.891239	0.946541	0.927673	0.918705	0.0004813
F1M9F9	Jouberin OS=Rattus norvegicus GN=Ahi1 PE=1 SV=2	3	3	0.881159	0.936232	0.904762	0.96131	0.920866	0.00409542
F1LPD6	3-ketoacyl-CoA thiolase B, peroxisomal OS=Rattus norvegicus GN=Acaa1a PE=1 SV=2	2	2	0.824798	1.18329	0.809524	1.16138	0.994746	0.960853
F1LYX9	Desmoglein 2 OS=Rattus norvegicus GN=Dsg2 PE=1 SV=2	1	1	0.897661	1.10526	0.852778	1.05	0.976425	0.708933
D4A5X1	Stromal interaction molecule 2 OS=Rattus norvegicus GN=Stim2 PE=1 SV=2	1	1	0.939759	1	0.893983	0.951289	0.946258	0.0485654
Q5VLR6	BWK3 OS=Rattus norvegicus GN=LOC366772 PE=2 SV=1	1	1	0.80102	1.06633	0.678186	0.902808	0.862085	0.144064
A0A0G2JY12	Paxillin OS=Rattus norvegicus GN=Pxn PE=1 SV=1	1	1	0.918605	1.09302	0.943284	1.12239	1.01932	0.721024
D3ZXM4	Ecotropic viral integration site 5-like (Fragment) OS=Rattus norvegicus GN=Evi5l PE=4 SV=2	1	1	0.987539	1.24922	0.802532	1.01519	1.01362	0.886701
A0A096MJI4	GRB10-interacting GYF protein 2 (Fragment) OS=Rattus norvegicus GN=Gigyf2 PE=1 SV=1	1	1	1.00313	0.931034	1.15523	1.0722	1.0404	0.431427
D4ACG6	Chromodomain helicase DNA-binding protein 1-like OS=Rattus norvegicus GN=Chd1l PE=1 SV=3	2	1	1.24903	1.33852	1.06645	1.14286	1.19921	0.0156132
G3V6K0	COMM domain containing 5, isoform CRA_a OS=Rattus norvegicus GN=Commd5 PE=1 SV=1	3	3	0.820972	0.818414	0.89916	0.896359	0.858726	0.000767796
D3ZUL3	Collagen type VI alpha 1 chain OS=Rattus norvegicus GN=Col6a1 PE=1 SV=1	3	3	0.872629	0.98645	0.952663	1.07692	0.972166	0.534897
H1UBM7	Copine 2 protein OS=Rattus norvegicus GN=Cpne2 PE=2 SV=1	2	1	1.01887	1.04717	1.03846	1.06731	1.04295	0.00523267
D3ZHM7	Deoxynucleotidyltransferase, terminal,-interacting protein 2 OS=Rattus norvegicus GN=Dnttip2 PE=1 SV=2	1	1	0.910112	0.921348	0.975904	0.987952	0.948829	0.0386826
A0A182DWI7	NAD-dependent protein deacetylase sirtuin-1 OS=Rattus norvegicus GN=Sirt1 PE=4 SV=1	1	1	0.86631	1.08021	0.845953	1.05483	0.961827	0.556898
B5DFI9	Pdk3 protein OS=Rattus norvegicus GN=Pdk3 PE=2 SV=1	1	1	0.955882	0.988235	0.777512	0.803828	0.881364	0.0666854
Q499N6	UBX domain-containing protein 1 OS=Rattus norvegicus GN=Ubxn1 PE=3 SV=2	2	2	1.02492	0.962617	1.02812	0.965625	0.995322	0.804033
F1LTR1	WD repeat-containing protein 26 OS=Rattus norvegicus GN=Wdr26 PE=3 SV=2	2	2	1.00917	1.21407	0.870712	1.04749	1.03536	0.634481
Q8R4Z9	Mitofusin-1 OS=Rattus norvegicus GN=Mfn1 PE=1 SV=1	2	2	1.00912	1.12766	0.844784	0.94402	0.981396	0.764407
Q642A9	VPS16 CORVET/HOPS core subunit OS=Rattus norvegicus GN=Vps16 PE=1 SV=1	5	5	0.925414	0.922652	1.00299	1	0.962765	0.147178
M0R3Z8	RCG28930, isoform CRA_b OS=Rattus norvegicus GN=Rbm15 PE=1 SV=2	2	2	0.886243	1.60053	0.788235	1.42353	1.17463	0.414213
D3ZUQ0	RILP-like protein 1 OS=Rattus norvegicus GN=Rilpl1 PE=1 SV=1	1	1	0.834158	0.935644	0.928375	1.04132	0.934875	0.174978
B0BN78	RCG49239 OS=Rattus norvegicus GN=Taf7 PE=1 SV=1	1	1	0.861893	1.08951	0.840399	1.06234	0.963537	0.596642
P19643	Amine oxidase [flavin-containing] B OS=Rattus norvegicus GN=Maob PE=1 SV=3	4	4	0.886842	0.960526	0.800475	0.866983	0.878707	0.0102992
D3ZEK5	Heparan-sulfate 6-O-sulfotransferase OS=Rattus norvegicus GN=Hs6st2 PE=3 SV=2	1	1	0.86514	1.29771	0.650096	0.975143	0.947022	0.708267
A0A0G2K012	UBX domain protein 6 OS=Rattus norvegicus GN=Ubxn6 PE=1 SV=1	1	1	0.830918	0.956522	0.801865	0.923077	0.878095	0.0160699
D4ACD4	RNA pseudouridylate synthase domain containing 2 (Predicted) OS=Rattus norvegicus GN=LOC100911166 PE=1 SV=1	1	1	0.833729	0.942993	1.04464	1.18155	1.00073	0.992476
A0A0G2JSM8	Cell division control protein 42 homolog OS=Rattus norvegicus GN=Cdc42 PE=1 SV=1	4	1	1.01739	1.41739	0.839713	1.16986	1.11109	0.398981
D3ZMR1	Translocase of outer mitochondrial membrane 7 OS=Rattus norvegicus GN=Tomm7 PE=1 SV=1	1	1	0.897698	1.07417	0.80137	0.958904	0.933035	0.285603
B2RZB5	Charged multivesicular body protein 2A OS=Rattus norvegicus GN=Chmp2a PE=1 SV=1	1	1	0.933687	1.09019	0.820513	0.958042	0.950607	0.406462
Q4G067	Mitochondrial ribosomal protein L44 OS=Rattus norvegicus GN=Mrpl44 PE=1 SV=1	1	1	1.05341	1.26706	0.975275	1.17308	1.11721	0.118697
Q4V8B3	Mediator of RNA polymerase II transcription subunit 24 OS=Rattus norvegicus GN=Med24 PE=1 SV=1	1	1	0.859564	0.803874	0.941645	0.880637	0.87143	0.00402772
P28042	Single-stranded DNA-binding protein, mitochondrial OS=Rattus norvegicus GN=Ssbp1 PE=1 SV=2	1	1	0.808656	1.05695	0.870098	1.13725	0.968239	0.695095
P05540	T-cell surface glycoprotein CD4 OS=Rattus norvegicus GN=Cd4 PE=1 SV=1	1	1	1.10559	1.13975	1.39608	1.43922	1.27016	0.0199305
Q8K4Y7	Soluble calcium-activated nucleotidase 1 OS=Rattus norvegicus GN=Cant1 PE=1 SV=1	3	3	1.0169	2.17183	1.04335	2.22832	1.6151	0.118627
P81795	Eukaryotic translation initiation factor 2 subunit 3, X-linked OS=Rattus norvegicus GN=Eif2s3 PE=1 SV=2	5	1	1.15924	0.840764	1.27719	0.926316	1.05088	0.632692
D3ZZU8	Fructosamine 3 kinase OS=Rattus norvegicus GN=Fn3k PE=4 SV=2	2	2	1.03409	1.11932	0.912281	0.987469	1.01329	0.769503
A0A0G2K0X1	Pericentriolar material 1 OS=Rattus norvegicus GN=Pcm1 PE=1 SV=1	2	2	0.968085	0.851064	0.866667	0.761905	0.86193	0.0170682
D3ZZZ5	Phosphopantothenoylcysteine decarboxylase OS=Rattus norvegicus GN=Ppcdc PE=1 SV=1	1	1	1.16879	1.1879	1.1189	1.1372	1.1532	6.17e-05
P80067	Dipeptidyl peptidase 1 OS=Rattus norvegicus GN=Ctsc PE=1 SV=3	1	1	1.1155	1.29787	1	1.16349	1.14422	0.0578939
Q63159	Ubiquinone biosynthesis O-methyltransferase, mitochondrial OS=Rattus norvegicus GN=Coq3 PE=2 SV=2	2	2	0.843678	1.01839	0.997283	1.2038	1.01579	0.837633
P57790	Kelch-like ECH-associated protein 1 OS=Rattus norvegicus GN=Keap1 PE=2 SV=1	1	1	0.986559	0.994624	0.983914	0.991957	0.989264	0.00463936
O54861	Sortilin OS=Rattus norvegicus GN=Sort1 PE=1 SV=3	2	2	0.904177	0.980344	0.895377	0.970803	0.937675	0.0300463
D3Z8P5	Similar to pyridoxal (pyridoxine, vitamin B6) kinase OS=Rattus norvegicus GN=RGD1566085 PE=1 SV=2	5	1	0.939698	0.90201	1.02466	0.983562	0.962482	0.207977
D3ZAF5	Periostin OS=Rattus norvegicus GN=Postn PE=1 SV=1	1	1	1.02747	1.03297	0.971429	0.976623	1.00212	0.900605
Q9Z0J5	Thioredoxin reductase 2, mitochondrial OS=Rattus norvegicus GN=Txnrd2 PE=1 SV=3	2	1	1.16099	0.866873	1.28425	0.958904	1.06775	0.501487
P13852	Major prion protein OS=Rattus norvegicus GN=Prnp PE=1 SV=2	1	1	0.619835	1.10909	0.641026	1.14701	0.87924	0.433589
G3V6F5	ElaC homolog 2 (E. coli) OS=Rattus norvegicus GN=Elac2 PE=1 SV=1	3	3	0.9425	1.145	0.887059	1.07765	1.01305	0.833554
B2RZ53	RAB36, member RAS oncogene family OS=Rattus norvegicus GN=Rab36 PE=2 SV=1	1	1	1.00265	1.0504	1.31707	1.37979	1.18748	0.0939872
Q6AYB4	Heat shock 70 kDa protein 14 OS=Rattus norvegicus GN=Hspa14 PE=2 SV=1	2	2	1.0618	1.03933	1.02439	1.00271	1.03206	0.0419598
A0A0G2K2D6	Tubulin polymerization-promoting protein OS=Rattus norvegicus GN=Tppp PE=1 SV=1	2	2	1.17337	1.47988	1.03836	1.30959	1.2503	0.0380305
M0R4V3	Synaptosomal-associated protein OS=Rattus norvegicus GN=Snap23 PE=3 SV=2	2	1	0.964377	1.06107	0.881395	0.969767	0.969152	0.432957
Q5EBA1	ATP-dependent RNA helicase SUPV3L1, mitochondrial OS=Rattus norvegicus GN=Supv3l1 PE=2 SV=1	2	2	0.88345	1.23776	0.751984	1.05357	0.981692	0.867737
F1M400	Ankyrin repeat domain 28 OS=Rattus norvegicus GN=Ankrd28 PE=1 SV=2	2	2	0.851685	1.09663	0.750495	0.966337	0.916287	0.304374
A0A0G2JW23	NLR family, pyrin domain-containing 12 OS=Rattus norvegicus GN=Nlrp12 PE=4 SV=1	1	1	1.09169	1.0086	1.12389	1.03835	1.06563	0.0446366
F1LMA4	G protein-coupled receptor kinase OS=Rattus norvegicus GN=Grk2 PE=1 SV=2	3	3	1.20189	1.12618	1.00794	0.944444	1.07011	0.271117
D3ZRG7	RNA-binding motif protein 26 OS=Rattus norvegicus GN=Rbm26 PE=1 SV=2	4	4	0.967089	0.951899	0.890443	0.876457	0.921472	0.0126236
Q6PDW1	40S ribosomal protein S12 OS=Rattus norvegicus GN=Rps12 PE=1 SV=1	4	1	1.07887	1.05352	1.01592	0.992042	1.03509	0.119198
Q6AY90	Family with sequence similarity 192, member A OS=Rattus norvegicus GN=Fam192a PE=2 SV=1	2	2	0.895105	1.36597	0.847682	1.2936	1.10059	0.479677
D3ZVD8	Histone deacetylase OS=Rattus norvegicus GN=Hdac6 PE=1 SV=2	2	2	0.706204	0.981752	0.737143	1.02476	0.862465	0.144514
D3ZAQ6	Nucleolar protein 7 OS=Rattus norvegicus GN=Nol7 PE=1 SV=3	1	1	0.779559	0.981964	0.862528	1.08647	0.927631	0.323543
F1M3B3	Pleckstrin homology domain-interacting protein OS=Rattus norvegicus GN=Phip PE=1 SV=2	3	3	1.05405	0.956757	1.03448	0.938992	0.996071	0.894301
A0A0G2K1M5	Similar to Ab2-095 OS=Rattus norvegicus GN=RGD1309079 PE=1 SV=1	2	2	0.994911	1.20865	0.987374	1.19949	1.09761	0.163673
Q9JIX3	Bis(5'-adenosyl)-triphosphatase OS=Rattus norvegicus GN=Fhit PE=1 SV=1	3	3	1.06522	1.06522	0.894977	0.894977	0.980097	0.699531
Q5XI64	Monoacylglycerol lipase ABHD6 OS=Rattus norvegicus GN=Abhd6 PE=1 SV=1	3	3	0.916084	0.958042	1.10393	1.15449	1.03314	0.58259
D4A7H9	CHMP family, member 7 (Predicted), isoform CRA_a OS=Rattus norvegicus GN=Chmp7 PE=1 SV=1	1	1	1.18373	1.20783	1.0155	1.03618	1.11081	0.0664099
Q68FW7	Threonine--tRNA ligase, mitochondrial OS=Rattus norvegicus GN=Tars2 PE=2 SV=1	3	2	0.940334	1.0358	0.847312	0.933333	0.939195	0.165571
D4ACQ9	GA repeat binding protein, alpha (Predicted) OS=Rattus norvegicus GN=Gabpa PE=1 SV=1	2	2	1.05319	1.0266	0.963504	0.939173	0.995616	0.874509
D4A9U9	Melanoregulin OS=Rattus norvegicus GN=Mreg PE=1 SV=1	1	1	1.05882	0.981283	0.961165	0.890777	0.973012	0.464583
F1M790	Prostaglandin F2 receptor negative regulator OS=Rattus norvegicus GN=Ptgfrn PE=1 SV=3	2	2	0.932084	1.05386	0.912844	1.03211	0.982726	0.641901
F1LQU9	Small G protein-signaling modulator 3 OS=Rattus norvegicus GN=Sgsm3 PE=1 SV=1	5	5	1.07258	0.916667	1.13675	0.97151	1.02438	0.63958
Q4G005	TFIIH basal transcription factor complex helicase XPB subunit OS=Rattus norvegicus GN=Ercc3 PE=1 SV=1	2	2	0.932401	1.09091	0.909091	1.06364	0.999009	0.983435
Q4V8Q2	Serine peptidase inhibitor, Kunitz type 1 OS=Rattus norvegicus GN=Spint1 PE=2 SV=1	1	1	0.915332	1.37529	0.829876	1.24689	1.09185	0.507738
A0A0G2JZD1	Serine/threonine-protein phosphatase 2A 56 kDa regulatory subunit OS=Rattus norvegicus GN=Ppp2r5c PE=1 SV=1	3	3	0.904977	1.04525	0.817996	0.944785	0.928252	0.178783
A0A0G2K6I5	Transgelin OS=Rattus norvegicus GN=Tagln3 PE=1 SV=1	5	5	0.934732	0.839161	1.17251	1.05263	0.99976	0.997455
A0A0G2KAG1	SUN domain-containing ossification factor OS=Rattus norvegicus GN=Suco PE=1 SV=1	1	1	0.798419	0.964427	0.711268	0.859155	0.833317	0.0202537
A0A096MJE6	Tenascin R, isoform CRA_b OS=Rattus norvegicus GN=Tnr PE=1 SV=1	3	3	0.853249	1.42767	0.869658	1.45513	1.15143	0.400927
B5DFG6	Car13 protein OS=Rattus norvegicus GN=Car13 PE=1 SV=1	1	1	0.832653	1.06531	0.92517	1.18367	1.0017	0.983148
Q4V7D9	Sphingomyelin phosphodiesterase, acid-like 3B OS=Rattus norvegicus GN=Smpdl3b PE=2 SV=1	1	1	0.88121	1.06695	0.759777	0.919926	0.906967	0.192071
Q5M888	UPF0415 protein C7orf25 homolog OS=Rattus norvegicus PE=2 SV=1	1	1	1.34539	1.10526	1.18551	0.973913	1.15252	0.0972537
Q62760	Mitochondrial import receptor subunit TOM20 homolog OS=Rattus norvegicus GN=Tomm20 PE=1 SV=2	1	1	0.929545	0.931818	1.00739	1.00985	0.969651	0.226241
F1LNT0	Dihydropyrimidinase-related protein 4 OS=Rattus norvegicus GN=Dpysl4 PE=4 SV=1	2	2	1.06771	1.02083	1.12022	1.07104	1.06995	0.0137063
D3ZIT7	Integrator complex subunit 1-like OS=Rattus norvegicus GN=LOC103689975 PE=1 SV=3	1	1	0.905077	1.03532	0.866808	0.991543	0.949687	0.240952
D4A304	DIRAS family GTPase 1 OS=Rattus norvegicus GN=Diras1 PE=4 SV=1	1	1	1.22552	1.27003	1.01724	1.05419	1.14174	0.0633579
D4A769	Sterile alpha motif domain-containing 4B OS=Rattus norvegicus GN=Samd4b PE=1 SV=1	1	1	0.934537	1.09255	0.871579	1.01895	0.979404	0.684727
A0A0G2K948	Double PHD fingers 2 OS=Rattus norvegicus GN=Dpf2 PE=1 SV=1	2	2	0.936937	0.941441	0.926503	0.930958	0.93396	9.82694e-07
D4A5J1	Kelch repeat and BTB domain-containing 11 OS=Rattus norvegicus GN=Kbtbd11 PE=1 SV=1	2	2	0.943694	0.93018	1.18697	1.16997	1.0577	0.440444
Q925D4	Transmembrane protein 176B OS=Rattus norvegicus GN=Tmem176b PE=1 SV=1	1	1	1.01942	0.919903	0.997625	0.900238	0.959296	0.210638
D3ZJ29	Uridine kinase-like 1 (Predicted) OS=Rattus norvegicus GN=Zfp512b PE=4 SV=1	2	2	0.961098	1.15332	0.899358	1.07923	1.02325	0.698495
Q8CHJ4	Transcription factor YY1 OS=Rattus norvegicus GN=Yy1 PE=1 SV=1	1	1	0.621861	0.791728	0.840319	1.06986	0.830942	0.117004
B2RZ64	Mbd3 protein (Fragment) OS=Rattus norvegicus GN=Mbd3 PE=2 SV=1	1	1	0.739965	1.10646	0.705491	1.05491	0.901705	0.381525
D3ZUT9	Integrator complex subunit 3 OS=Rattus norvegicus GN=Ints3 PE=1 SV=1	2	2	1.07868	1.16751	0.963719	1.04308	1.06325	0.185042
B0BNB1	Commd1 protein OS=Rattus norvegicus GN=Commd1 PE=1 SV=1	1	1	0.934498	0.836245	0.988453	0.884527	0.91093	0.0345092
D3ZTY0	Cornichon family AMPA receptor auxiliary protein 4 OS=Rattus norvegicus GN=Cnih4 PE=1 SV=1	1	1	0.875256	0.944785	0.873469	0.942857	0.909092	0.00396579
A0A0H2UHN2	Isopentenyl-diphosphate Delta-isomerase 1 OS=Rattus norvegicus GN=Idi1 PE=1 SV=1	1	1	1.07519	1.36341	1.07789	1.36683	1.22083	0.0379952
Q5BKC6	HSPB1-associated protein 1 OS=Rattus norvegicus GN=Hspbap1 PE=1 SV=1	1	1	0.959732	1.9217	0.981693	1.96568	1.4572	0.154917
G3V8T3	Adenosine deaminase, RNA-specific, isoform CRA_b OS=Rattus norvegicus GN=Adar PE=1 SV=1	3	3	0.909091	0.968288	0.922747	0.982833	0.945739	0.022028
A0A0G2JVI4	Fucokinase OS=Rattus norvegicus GN=Fuk PE=1 SV=1	2	2	0.955556	1.08444	0.899582	1.02092	0.990126	0.813423
A0A0G2JXE5	Ankyrin repeat and LEM domain-containing protein 2 OS=Rattus norvegicus GN=Ankle2 PE=1 SV=1	1	1	0.861723	1.06814	0.836576	1.03696	0.95085	0.438796
Q09325	Alpha-1,3-mannosyl-glycoprotein 2-beta-N-acetylglucosaminyltransferase OS=Rattus norvegicus GN=Mgat1 PE=2 SV=1	1	1	0.972851	1.6086	0.82218	1.35946	1.19077	0.328616
D4AAB5	Peptidase M20 domain-containing 2 OS=Rattus norvegicus GN=Pm20d2 PE=4 SV=1	2	2	1.09114	0.906329	1.18407	0.983516	1.04126	0.522934
D3ZWB1	LSM1 homolog, U6 small nuclear RNA associated (S. cerevisiae) (Predicted) OS=Rattus norvegicus GN=Lsm1 PE=4 SV=1	1	1	0.96868	0.991051	1.0962	1.12152	1.04436	0.285833
Q6AYS8	Estradiol 17-beta-dehydrogenase 11 OS=Rattus norvegicus GN=Hsd17b11 PE=2 SV=1	3	3	0.927505	0.997868	1.11825	1.20308	1.06168	0.354058
A0A0G2KA50	VPS39 HOPS complex subunit OS=Rattus norvegicus GN=Vps39 PE=1 SV=1	1	1	0.830476	1.04381	0.879032	1.10484	0.964539	0.606953
Q76EQ0	Serine racemase OS=Rattus norvegicus GN=Srr PE=1 SV=1	1	1	1	0.757437	1.06326	0.805353	0.906513	0.253511
B1H241	Resistance to inhibitors of cholinesterase 8 homolog A (C. elegans) OS=Rattus norvegicus GN=Ric8a PE=1 SV=1	3	3	0.882828	0.892929	0.947939	0.958785	0.920621	0.00603504
D3ZP60	Putative uncharacterized protein RGD1308559_predicted OS=Rattus norvegicus GN=Vwa5b1 PE=4 SV=1	1	1	0.87751	0.993976	0.881048	0.997984	0.93763	0.113725
A0A0G2JT23	Nuclear receptor-binding protein 2 OS=Rattus norvegicus GN=Nrbp2 PE=1 SV=1	1	1	0.988713	1.19187	0.869048	1.04762	1.02431	0.729432
A0A0G2JUG7	IQ motif and Sec7 domain 1 OS=Rattus norvegicus GN=Iqsec1 PE=1 SV=1	2	2	0.94206	0.88412	0.946121	0.887931	0.915058	0.00231991
Q5U2U0	ATP-dependent Clp protease ATP-binding subunit clpX-like, mitochondrial OS=Rattus norvegicus GN=Clpx PE=2 SV=1	6	6	0.888889	0.959596	0.881764	0.951904	0.920538	0.00810286
Q6MG08	ATP-binding cassette sub-family F member 1 OS=Rattus norvegicus GN=Abcf1 PE=1 SV=1	3	3	0.853282	0.88417	0.905738	0.938525	0.895429	0.00112541
B1H249	Glucosamine-phosphate N-acetyltransferase 1 OS=Rattus norvegicus GN=Gnpnat1 PE=1 SV=1	2	2	0.973856	0.921569	1.12594	1.06549	1.02172	0.651713
Q32KJ6	N-acetylgalactosamine-6-sulfatase OS=Rattus norvegicus GN=Galns PE=1 SV=1	1	1	1.21409	1.09485	0.984615	0.887912	1.04537	0.542891
A0A0G2JSX1	Non-structural maintenance of chromosomes element 1 homolog OS=Rattus norvegicus GN=Nsmce1 PE=4 SV=1	1	1	0.844569	0.867041	0.941545	0.966597	0.904938	0.0173135
F1LMV6	Desmoplakin OS=Rattus norvegicus GN=Dsp PE=1 SV=1	8	8	0.821494	1.13661	0.87234	1.20696	1.00935	0.925131
Q6AXY7	Pre-mRNA-splicing factor 38B OS=Rattus norvegicus GN=Prpf38b PE=1 SV=1	1	1	1.02961	0.981777	1.15013	1.09669	1.06455	0.131666
Q5XI55	Peptide-N(4)-(N-acetyl-beta-glucosaminyl)asparagine amidase OS=Rattus norvegicus GN=Ngly1 PE=2 SV=2	2	2	0.945607	0.889121	0.931959	0.876289	0.910744	0.00171836
D3ZIU2	Proteasome assembly chaperone 3 OS=Rattus norvegicus GN=Psmg3 PE=1 SV=1	2	2	0.752902	0.774461	0.895464	0.921105	0.835983	0.00819419
D3ZTF1	Solute carrier family 4 member 1 adaptor protein OS=Rattus norvegicus GN=Slc4a1ap PE=1 SV=3	3	3	1.28895	1.03399	0.99345	0.796943	1.02833	0.788735
D3ZNF4	Transducin (Beta)-like 1X-linked receptor 1 (Predicted) OS=Rattus norvegicus GN=Tbl1xr1 PE=1 SV=1	2	1	0.93279	0.930754	0.905138	0.903162	0.917961	4.99783e-05
Q566D2	RCG30218, isoform CRA_b OS=Rattus norvegicus GN=Tigar PE=2 SV=1	1	1	0.835766	1.04197	0.817857	1.01964	0.928809	0.274286
Q2HWF0-2	Isoform 2 of Formin-binding protein 1-like OS=Rattus norvegicus GN=Fnbp1l	1	1	0.908911	1.16238	1.07746	1.37793	1.13167	0.225704
B1WC45	Vacuolar protein sorting 72 (Yeast) (Predicted) OS=Rattus norvegicus GN=Vps72 PE=2 SV=1	1	1	0.815603	0.991135	0.938776	1.14082	0.971582	0.687759
G3V8Q1	Coatomer subunit epsilon OS=Rattus norvegicus GN=Cope PE=1 SV=3	2	2	0.829137	0.938849	0.813051	0.920635	0.875418	0.00777173
A0A0G2KAX1	EEF1A lysine methyltransferase 1 OS=Rattus norvegicus GN=Eef1akmt1 PE=3 SV=1	1	1	0.883365	1.07457	0.75367	0.916803	0.907102	0.208798
Q5BJT7	Coiled-coil domain-containing protein 93 OS=Rattus norvegicus GN=Ccdc93 PE=1 SV=1	3	3	1.11566	1.15422	1.06437	1.10115	1.10885	0.00109284
A0A0G2K9B4	Mitochondrial ribosomal protein L15 OS=Rattus norvegicus GN=Mrpl15 PE=1 SV=1	1	1	0.972746	1.10063	0.88381	1	0.989296	0.818475
Q499T3	Sirpa protein OS=Rattus norvegicus GN=Sirpa PE=1 SV=1	2	2	1.0615	1.15034	1.01747	1.10262	1.08298	0.0265525
Q6AYA6	Uncharacterized protein C17orf62 homolog OS=Rattus norvegicus PE=1 SV=1	1	1	0.924603	1.63889	0.869403	1.54104	1.24348	0.272048
Q9EQL9	Sharpin OS=Rattus norvegicus GN=Sharpin PE=1 SV=1	1	1	0.995763	0.985169	0.95723	0.947047	0.971302	0.0463159
Q5XI79	Protein arginine methyltransferase NDUFAF7, mitochondrial OS=Rattus norvegicus GN=Ndufaf7 PE=2 SV=1	1	1	0.942688	0.851779	1.09404	0.988532	0.969259	0.564062
D3ZFT1	Replication factor C subunit 1 OS=Rattus norvegicus GN=Rfc1 PE=1 SV=2	2	2	1.07901	1.23251	1.00632	1.14947	1.11683	0.0522442
G3V8D6	Tripartite motif protein 3, isoform CRA_a OS=Rattus norvegicus GN=Trim3 PE=1 SV=1	3	3	0.889094	0.927911	1.16748	1.21845	1.05073	0.564161
Q6AXY0	Glutathione S-transferase A6 OS=Rattus norvegicus GN=Gsta6 PE=1 SV=1	1	1	0.895717	1.01304	0.91619	1.03619	0.965283	0.357374
D3ZF39	UDP-N-acetylglucosamine pyrophosphorylase 1 OS=Rattus norvegicus GN=Uap1 PE=1 SV=2	1	1	0.882784	0.996337	0.804674	0.90818	0.897994	0.0416022
D4AAI7	Family with sequence similarity 219, member A OS=Rattus norvegicus GN=Fam219a PE=1 SV=2	1	1	1.04772	1.07158	0.983707	1.00611	1.02728	0.218428
Q5M9I6	Multiple myeloma tumor-associated protein 2 homolog OS=Rattus norvegicus GN=Mmtag2 PE=2 SV=2	1	1	0.947059	1.05686	0.92	1.02667	0.987647	0.715499
G3V790	Transcription activator BRG1 OS=Rattus norvegicus GN=Smarca4 PE=1 SV=2	7	3	1.05689	1.29322	0.886239	1.0844	1.08019	0.373682
G3V8X1	RNA-binding protein 42 OS=Rattus norvegicus GN=Rbm42 PE=1 SV=1	2	2	0.880651	1.08318	0.922348	1.13447	1.00516	0.935672
Q56R17	Importin subunit alpha OS=Rattus norvegicus GN=Kpna4 PE=1 SV=1	5	2	0.944123	0.905588	0.887681	0.851449	0.89721	0.00177096
Q5RJY4	Dehydrogenase/reductase SDR family member 7B OS=Rattus norvegicus GN=Dhrs7b PE=1 SV=1	1	1	0.864198	0.977072	0.870337	0.984014	0.923905	0.059191
A0A096MK61	Cartilage-associated protein-like 1 OS=Rattus norvegicus GN=Crtapl1 PE=1 SV=1	2	2	0.906077	0.961326	0.944338	1.00192	0.953415	0.0575041
D4ADS6	Integrator complex subunit 7 OS=Rattus norvegicus GN=Ints7 PE=1 SV=1	1	1	0.944338	0.994242	0.896175	0.943534	0.944572	0.0324925
D3ZCP9	Transcription initiation factor IIE subunit beta OS=Rattus norvegicus GN=Gtf2e2 PE=1 SV=1	1	1	1.02277	1.0559	0.851724	0.87931	0.952427	0.386428
D3ZFE9	Mitochondrial ribosomal protein L1-like OS=Rattus norvegicus GN=LOC100359687 PE=1 SV=3	1	1	0.871252	1.10406	0.817881	1.03642	0.957403	0.551143
D3ZX63	Similar to D3Mm3e (Predicted), isoform CRA_a OS=Rattus norvegicus GN=Wdr54 PE=4 SV=1	2	2	1.19231	0.901442	0.976378	0.738189	0.952079	0.629317
A6Y857	Phosphoinositide phospholipase C OS=Rattus norvegicus PE=2 SV=1	2	2	0.972549	0.978431	0.887299	0.892665	0.932736	0.0346841
Q6IFU7	Keratin, type I cytoskeletal 42 OS=Rattus norvegicus GN=Krt42 PE=3 SV=1	5	3	0.937736	1.60755	0.848123	1.45392	1.21183	0.302088
Q7TQ77	Ac1288 OS=Rattus norvegicus GN=Hook3 PE=1 SV=1	3	3	1.06183	1.04904	1.02469	1.01235	1.03698	0.0167291
D3ZEM8	RCG34104, isoform CRA_a OS=Rattus norvegicus GN=Tsr1 PE=1 SV=1	1	1	0.917127	0.902394	0.91042	0.895795	0.906434	9.81458e-07
F1LMT5	PEX5-related protein OS=Rattus norvegicus GN=Pex5l PE=1 SV=2	2	2	1.00402	1.14286	0.945076	1.07576	1.04193	0.366775
P10687	1-phosphatidylinositol 4,5-bisphosphate phosphodiesterase beta-1 OS=Rattus norvegicus GN=Plcb1 PE=1 SV=1	1	1	0.990119	1.05138	0.952471	1.01141	1.00135	0.950194
D4ABK1	Synaptogyrin 3 OS=Rattus norvegicus GN=Syngr3 PE=1 SV=1	1	1	1.22794	1.2402	0.857877	0.866438	1.04811	0.669903
B2GUX5	5'-nucleotidase OS=Rattus norvegicus GN=Nt5c3a PE=1 SV=1	3	3	0.840871	0.938023	0.990138	1.10454	0.968392	0.585846
Q5BJP2	Spliceosome-associated protein CWC15 homolog OS=Rattus norvegicus GN=Cwc15 PE=1 SV=1	2	2	0.891652	1.00178	0.564679	0.634421	0.773132	0.0712756
D3ZL95	Ubiquitin-specific peptidase 40 OS=Rattus norvegicus GN=Usp40 PE=1 SV=1	1	1	0.913043	1.17572	1.00398	1.29283	1.0964	0.30089
F1M7C0	Transmembrane protein 260 OS=Rattus norvegicus GN=Tmem260 PE=4 SV=2	1	1	0.962049	0.981025	0.975	0.994231	0.978076	0.0168137
A0A0G2JW38	Ribulose-phosphate 3-epimerase OS=Rattus norvegicus GN=Rpe PE=1 SV=1	3	2	1.074	0.94926	0.93211	0.823853	0.944805	0.322746
Q58NB7	Retinoic acid receptor responder (Tazarotene induced) 1 OS=Rattus norvegicus GN=Rarres1 PE=2 SV=1	3	3	0.978805	1.01541	0.785162	0.814529	0.898478	0.129235
D3ZJB8	Ariadne RBR E3 ubiquitin protein ligase 2 OS=Rattus norvegicus GN=Arih2 PE=1 SV=1	1	1	1.00391	1.12891	1.01581	1.14229	1.07273	0.093256
A1A5Q1	Poly [ADP-ribose] polymerase OS=Rattus norvegicus GN=Parp9 PE=1 SV=1	2	2	0.810726	0.858044	0.916221	0.969697	0.888672	0.0181203
A0A0G2JWE3	Protein IWS1 homolog OS=Rattus norvegicus GN=Iws1 PE=1 SV=1	1	1	0.934783	0.766304	1.03823	0.851107	0.897606	0.128673
D3ZWN1	Similar to zinc finger protein (Predicted) OS=Rattus norvegicus GN=Zpr1 PE=1 SV=1	2	2	0.914894	0.906028	0.931408	0.922383	0.918678	5.41176e-06
A0A0H2UHA3	Volume-regulated anion channel subunit LRRC8D OS=Rattus norvegicus GN=Lrrc8d PE=1 SV=1	1	1	0.936594	0.889493	0.986641	0.937023	0.937438	0.0197066
Q6AY69	Autophagy-related protein 101 OS=Rattus norvegicus GN=Atg101 PE=2 SV=1	1	1	1.00387	1.18956	0.970093	1.14953	1.07826	0.195808
G3V6I1	Lethal(2) giant larvae protein homolog 1 OS=Rattus norvegicus GN=Llgl1 PE=1 SV=2	1	1	0.713306	0.846365	0.893471	1.06014	0.87832	0.140198
A0A0G2K1G8	Solute carrier family 7, member 14 OS=Rattus norvegicus GN=Slc7a14 PE=1 SV=1	2	2	0.890598	0.960684	0.994275	1.07252	0.979519	0.607276
D3ZRM5	RAB23, member RAS oncogene family OS=Rattus norvegicus GN=Rab23 PE=4 SV=1	2	2	1.03984	1.05976	0.998088	1.01721	1.02872	0.075944
Q9QYW0	Protein AATF OS=Rattus norvegicus GN=Aatf PE=1 SV=1	1	1	1.0502	0.889558	1.10338	0.934599	0.994433	0.914353
A0A0G2JZL6	Intraflagellar transport 122 OS=Rattus norvegicus GN=Ift122 PE=4 SV=1	2	2	0.870216	0.966722	0.808346	0.897991	0.885819	0.0131867
B2GUW4	Exdl2 protein OS=Rattus norvegicus GN=Exd2 PE=2 SV=1	2	2	0.845161	1.02581	1.00576	1.22073	1.02436	0.762204
A0A0G2K5K1	Anoctamin OS=Rattus norvegicus GN=Ano8 PE=1 SV=1	1	1	0.981273	1.33521	0.930728	1.26643	1.12841	0.250876
O35049	Sphingomyelin phosphodiesterase 3 OS=Rattus norvegicus GN=Smpd3 PE=1 SV=2	3	3	1.00575	1.01341	0.872093	0.878738	0.942497	0.188695
P06536	Glucocorticoid receptor OS=Rattus norvegicus GN=Nr3c1 PE=1 SV=2	1	1	1.14069	1.04762	0.961679	0.883212	1.0083	0.885908
A1L1L9	RGD1563224 protein OS=Rattus norvegicus GN=Tmem65 PE=2 SV=1	1	1	0.996219	1.03403	0.931095	0.966431	0.981943	0.440704
D4ADZ2	BICD cargo adaptor 1 OS=Rattus norvegicus GN=Bicd1 PE=4 SV=1	1	1	1.07332	0.92057	0.919721	0.788831	0.92561	0.248095
A0A0G2JV51	RNA cytidine acetyltransferase OS=Rattus norvegicus GN=Nat10 PE=1 SV=1	2	2	0.916667	1.0191	0.972376	1.08103	0.997293	0.940676
A0A0G2K8Q1	Apolipoprotein C-III OS=Rattus norvegicus GN=Apoc3 PE=1 SV=1	2	2	1.11158	0.991579	0.882943	0.787625	0.943432	0.44886
A0A0G2JV16	Dedicator of cytokinesis 11 OS=Rattus norvegicus GN=Dock11 PE=1 SV=1	1	1	1.06653	0.90121	1.09979	0.929314	0.999212	0.98776
D3ZPP9	Caspase recruitment domain family, member 19 OS=Rattus norvegicus GN=Card19 PE=4 SV=1	2	2	1.06855	1.1754	0.968921	1.06581	1.06967	0.149639
Q6AYA2	Vaccinia-related kinase 1 OS=Rattus norvegicus GN=Vrk1 PE=1 SV=1	1	1	0.974265	0.996324	0.881864	0.90183	0.938571	0.0680487
D3ZH66	TAF5 RNA polymerase II, TATA box binding protein (TBP)-associated factor (Predicted) OS=Rattus norvegicus GN=Taf5 PE=4 SV=1	1	1	0.992509	1.14794	0.828125	0.957812	0.981597	0.789018
B5DFK7	Abhydrolase domain-containing 17C OS=Rattus norvegicus GN=Abhd17c PE=2 SV=1	1	1	0.825077	0.928793	0.962094	1.08303	0.949749	0.380927
A0A0G2K562	Disintegrin and metalloproteinase domain-containing protein 10 OS=Rattus norvegicus GN=Adam10 PE=1 SV=1	3	3	0.976277	0.979927	0.941901	0.945423	0.960882	0.00786114
D3ZYU4	COX20 cytochrome C oxidase assembly factor OS=Rattus norvegicus GN=Cox20 PE=1 SV=1	1	1	1.08048	1.36016	0.960644	1.2093	1.15265	0.12554
Q6IUU3	Sulfhydryl oxidase 1 OS=Rattus norvegicus GN=Qsox1 PE=1 SV=1	4	4	0.620809	0.86474	0.767143	1.06857	0.830316	0.120804
D3ZHX3	DIRAS family GTPase 2 OS=Rattus norvegicus GN=Diras2 PE=4 SV=1	1	1	1.00749	0.968165	1.05697	1.01572	1.01209	0.531472
O08560	Diacylglycerol kinase zeta OS=Rattus norvegicus GN=Dgkz PE=1 SV=1	1	1	1.03661	1.17919	0.847244	0.96378	1.00671	0.926247
A0A0G2JXD9	Dopey family member 2 OS=Rattus norvegicus GN=Dopey2 PE=1 SV=1	3	3	0.886513	0.978618	0.824159	0.909786	0.899769	0.0200123
B2RYJ2	Debranching RNA lariats 1 OS=Rattus norvegicus GN=Dbr1 PE=1 SV=1	1	1	0.994475	1.10681	1.03846	1.15577	1.07388	0.0843911
D3ZXN8	Annexin A10 OS=Rattus norvegicus GN=Anxa10 PE=4 SV=2	4	3	0.858506	1.13831	0.891089	1.18152	1.01736	0.841358
D4A264	Zinc-binding alcohol dehydrogenase, domain-containing 2 OS=Rattus norvegicus GN=Zadh2 PE=1 SV=2	2	2	0.971223	1.2518	0.8867	1.14286	1.06314	0.472679
Q91YB6	Complement inhibitory factor H OS=Rattus norvegicus GN=Cfh PE=2 SV=1	2	2	0.891447	0.898026	1.01308	1.02056	0.95578	0.256945
A0A0G2K916	Ankyrin repeat and KH domain-containing 1 OS=Rattus norvegicus GN=Ankhd1 PE=1 SV=1	4	1	0.884176	0.980424	0.894389	0.991749	0.937685	0.0685529
P41413	Proprotein convertase subtilisin/kexin type 5 OS=Rattus norvegicus GN=Pcsk5 PE=2 SV=3	3	3	0.888889	1.16176	0.842105	1.10062	0.998345	0.983816
D3ZT51	Exosome component 3 OS=Rattus norvegicus GN=Exosc3 PE=1 SV=2	1	1	1.13071	1.1805	1.07495	1.12229	1.12711	0.00107175
A0A0G2K5K7	Inositol polyphosphate-5-phosphatase K OS=Rattus norvegicus GN=Inpp5k PE=1 SV=1	1	1	0.974955	1.15027	0.941278	1.11054	1.04426	0.417616
Q6U6G5	Zinc finger CCCH domain-containing protein 15 OS=Rattus norvegicus GN=Zc3h15 PE=1 SV=1	1	1	0.886548	0.951378	1.00737	1.08103	0.981581	0.671478
A0A0G2K8N6	Ankyrin repeat and MYND domain-containing 2 OS=Rattus norvegicus GN=Ankmy2 PE=1 SV=1	3	3	0.876777	1.09795	0.855162	1.07088	0.975191	0.70932
Q9ESH6	Glutaredoxin-1 OS=Rattus norvegicus GN=Glrx PE=3 SV=3	1	1	0.843465	1.09422	0.810219	1.05109	0.949751	0.510384
P34901	Syndecan-4 OS=Rattus norvegicus GN=Sdc4 PE=1 SV=1	1	1	0.947189	0.994889	1.10757	1.16335	1.05325	0.325823
B1WBX6	Small ArfGAP2 OS=Rattus norvegicus GN=Smap2 PE=1 SV=1	3	3	1.09881	1.14229	1.07336	1.11583	1.10757	0.000307738
P06907	Myelin protein P0 OS=Rattus norvegicus GN=Mpz PE=1 SV=1	1	1	0.203588	0.269865	0.721141	0.955901	0.537624	0.0429928
F1LV37	Trinucleotide repeat-containing 6B OS=Rattus norvegicus GN=Tnrc6b PE=1 SV=2	1	1	0.982394	1.1162	1.09412	1.24314	1.10896	0.0876618
O35346	Focal adhesion kinase 1 OS=Rattus norvegicus GN=Ptk2 PE=1 SV=1	4	3	0.9	1.04839	0.958763	1.11684	1.006	0.904482
D4A0M2	Nucleoredoxin OS=Rattus norvegicus GN=Nxn PE=1 SV=2	1	1	0.928571	1.15781	0.907468	1.13149	1.03133	0.650689
A0A0G2JYJ1	Growth factor receptor-bound protein 10 OS=Rattus norvegicus GN=Grb10 PE=4 SV=1	1	1	1.07885	1.02308	1.0486	0.994393	1.03623	0.0909614
A0A0H2UHJ5	Zinc finger RNA-binding protein OS=Rattus norvegicus GN=Zfr PE=1 SV=1	6	6	1.05056	1.11423	1.0486	1.11215	1.08139	0.00442397
G3V619	Activating signal cointegrator 1 complex subunit 1 OS=Rattus norvegicus GN=Ascc1 PE=1 SV=1	1	1	0.894737	1.08453	1.01815	1.23412	1.05788	0.444177
D3ZQB6	Cat eye syndrome chromosome region, candidate 5 OS=Rattus norvegicus GN=Hdhd5 PE=1 SV=1	2	2	0.954237	0.988136	0.888013	0.919558	0.937486	0.0276947
B5DEX4	Vasp protein OS=Rattus norvegicus GN=Vasp PE=2 SV=1	1	1	1.15984	1.01434	1.03097	0.901639	1.0267	0.631573
Q6AYH6	ER membrane protein complex subunit 10 OS=Rattus norvegicus GN=Emc10 PE=1 SV=1	1	1	1.0759	1.09108	1.134	1.15	1.11275	0.000657744
D4ACD3	Ubiquitin specific protease 25 (Predicted) OS=Rattus norvegicus GN=Usp25 PE=1 SV=1	1	1	1.00353	1.13428	0.84273	0.952522	0.983265	0.791335
E9PTN1	Bromodomain-containing 8 OS=Rattus norvegicus GN=Brd8 PE=1 SV=1	1	1	1.18542	1.15417	1.08795	1.05927	1.1217	0.00578328
Q8CF97	Deubiquitinating protein VCIP135 OS=Rattus norvegicus GN=Vcpip1 PE=1 SV=2	3	3	0.928222	1.05546	0.851796	0.968563	0.951012	0.291946
F1M8Y4	DEP domain-containing MTOR-interacting protein OS=Rattus norvegicus GN=Deptor PE=1 SV=2	2	2	0.90779	1.02385	0.796374	0.898187	0.90655	0.0913014
A0A0G2K2Q2	Glycine C-acetyltransferase OS=Rattus norvegicus GN=Gcat PE=1 SV=1	2	2	1.02504	1.19499	0.880184	1.02611	1.03158	0.641013
Q9JJP9	Ubiquilin-1 OS=Rattus norvegicus GN=Ubqln1 PE=1 SV=1	4	1	0.953488	0.868771	0.864458	0.787651	0.868592	0.008186
G3V6J2	O-acyltransferase OS=Rattus norvegicus GN=Soat1 PE=3 SV=1	1	1	1.25217	1.3087	1.05109	1.09854	1.17763	0.0273138
Q6IMX7	Hsp70-binding protein 1 OS=Rattus norvegicus GN=Hspbp1 PE=1 SV=1	2	2	0.911392	1.09177	0.803347	0.962343	0.942214	0.371689
B2RYL8	DEAD (Asp-Glu-Ala-Asp) box polypeptide 41 OS=Rattus norvegicus GN=Ddx41 PE=1 SV=1	3	3	1.19462	1.16977	0.842336	0.824818	1.00789	0.940205
Q4KLN7	ADP-ribosylation factor GTPase-activating protein 3 OS=Rattus norvegicus GN=Arfgap3 PE=1 SV=1	4	4	1.1378	1.28543	1.09057	1.23208	1.18647	0.00556729
M0R5H1	Enhancer trap locus 4 OS=Rattus norvegicus GN=Etl4 PE=1 SV=2	3	3	0.941463	1.03089	0.845255	0.925547	0.93579	0.14252
B0BMY7	Protein tyrosine kinase 9-like (A6-related protein) (Predicted), isoform CRA_b OS=Rattus norvegicus GN=Twf2 PE=1 SV=1	1	1	0.920761	0.974643	0.991468	1.04949	0.98409	0.570312
B1H219	Dickkopf WNT-signaling pathway inhibitor 3 OS=Rattus norvegicus GN=Dkk3 PE=2 SV=1	1	1	0.920761	0.987322	0.87632	0.939668	0.931018	0.0239883
Q5XII9	Mitochondrial fission regulator 1-like OS=Rattus norvegicus GN=Mtfr1l PE=1 SV=1	2	2	0.805825	0.944521	0.858198	1.00591	0.903613	0.073466
Q0VGJ9	Receptor expression-enhancing protein OS=Rattus norvegicus GN=Reep2 PE=2 SV=1	2	2	0.955665	1.00493	0.983108	1.03378	0.994371	0.745456
Q5U1Y4	1,5-anhydro-D-fructose reductase OS=Rattus norvegicus GN=Akr1e2 PE=2 SV=1	2	2	1.23517	0.974576	0.988136	0.779661	0.994386	0.953982
P06757	Alcohol dehydrogenase 1 OS=Rattus norvegicus GN=Adh1 PE=1 SV=3	2	2	1.00516	1.01549	0.996587	1.00683	1.00602	0.171347
Q5PQN9	39S ribosomal protein L38, mitochondrial OS=Rattus norvegicus GN=Mrpl38 PE=2 SV=2	2	2	0.855051	0.878477	0.841499	0.864553	0.859895	1.9057e-06
D3ZMN2	Histone PARylation factor 1 OS=Rattus norvegicus GN=Hpf1 PE=4 SV=2	1	1	0.996599	0.897959	1.09944	0.990619	0.996154	0.928606
P68403-2	Isoform Beta-II of Protein kinase C beta type OS=Rattus norvegicus GN=Prkcb	5	1	0.877246	1.16916	0.806052	1.07428	0.981684	0.835387
A0A0G2K7X2	Tnf receptor-associated factor 3 OS=Rattus norvegicus GN=Traf3 PE=4 SV=1	2	2	0.92429	0.949527	0.760052	0.780804	0.853668	0.0235196
A0A0G2JZD6	Regulated endocrine-specific protein 18 OS=Rattus norvegicus GN=Resp18 PE=4 SV=1	1	1	0.923318	1.30203	1.06115	1.4964	1.19573	0.174666
A0A0G2JV26	Protein phosphatase 4, regulatory subunit 4 OS=Rattus norvegicus GN=Ppp4r4 PE=1 SV=1	1	1	1.08656	1.16759	1.00855	1.08376	1.08661	0.0371918
Q9WUF4	Vesicle-associated membrane protein 8 OS=Rattus norvegicus GN=Vamp8 PE=1 SV=1	3	3	0.95315	0.854604	0.917574	0.822706	0.887009	0.00875118
M0R660	Glyceraldehyde-3-phosphate dehydrogenase OS=Rattus norvegicus PE=1 SV=1	12	1	1.00509	1.04414	1.11698	1.16038	1.08165	0.0585039
A0A0G2K0Q8	Sushi domain-containing 2 OS=Rattus norvegicus GN=Susd2 PE=1 SV=1	2	2	1.08824	1.25919	1.09024	1.26151	1.17479	0.0122436
D4A565	NADH dehydrogenase (Ubiquinone) 1 beta subcomplex, 5 (Predicted), isoform CRA_b OS=Rattus norvegicus GN=Ndufb5 PE=1 SV=1	1	1	0.905344	1.02137	0.936809	1.05687	0.9801	0.594637
M0RAT6	Transmembrane p24 trafficking protein 8 OS=Rattus norvegicus GN=Tmed8 PE=1 SV=2	3	3	0.935331	0.944795	0.819061	0.827348	0.881634	0.0128471
A0A0G2K5F1	LRP16 protein OS=Rattus norvegicus GN=Macrod1 PE=1 SV=1	1	1	0.947368	0.984051	0.874816	0.908689	0.928731	0.0236237
D3ZLT7	Similar to RIKEN cDNA 2510039O18 OS=Rattus norvegicus GN=RGD1305350 PE=1 SV=1	3	3	1.08167	0.965517	1.11402	0.994393	1.0389	0.310996
D4A7Q6	Putative uncharacterized protein RGD1564862_predicted OS=Rattus norvegicus GN=Zfp428 PE=4 SV=2	1	1	0.965964	1.61102	1.00337	1.6734	1.31344	0.150815
F1M8G8	Signal-induced proliferation-associated 1-like protein 2 OS=Rattus norvegicus GN=Sipa1l2 PE=1 SV=3	1	1	1.05861	1.06394	0.964401	0.969256	1.01405	0.625173
D3ZV40	Unkempt family zinc finger OS=Rattus norvegicus GN=Unk PE=1 SV=1	1	1	0.966019	0.902913	0.833799	0.77933	0.870515	0.0189557
D3ZQ82	Regulatory factor X, 1 (Influences HLA class II expression) (Predicted) OS=Rattus norvegicus GN=Rfx1 PE=1 SV=1	1	1	0.961353	1.12077	0.667039	0.777654	0.881705	0.282305
A0A0U1RRU0	SRSF protein kinase 1 OS=Rattus norvegicus GN=Srpk1 PE=1 SV=1	1	1	1.02926	1.33219	0.893871	1.15695	1.10307	0.311935
D3ZT56	Zinc finger protein 687 OS=Rattus norvegicus GN=Zfp687 PE=1 SV=1	2	2	1.01012	1.1113	0.935937	1.02969	1.02176	0.56803
Q811S9	Guanine nucleotide-binding protein-like 3 OS=Rattus norvegicus GN=Gnl3 PE=1 SV=1	1	1	1.14943	1.09195	0.872093	0.828488	0.98549	0.861077
G3V6K3	Exosome component 7 OS=Rattus norvegicus GN=Exosc7 PE=1 SV=1	1	1	1.12687	1.10448	1.05226	1.03136	1.07874	0.0121624
A0A0G2JYU5	Ubiquitin-conjugating enzyme E2 B OS=Rattus norvegicus GN=LOC103694902 PE=1 SV=1	1	1	0.990164	1.16066	0.879185	1.03057	1.01514	0.803117
D3ZCQ2	ALG11, alpha-1,2-mannosyltransferase OS=Rattus norvegicus GN=Alg11 PE=1 SV=2	1	1	0.843794	0.788006	0.933642	0.871914	0.859339	0.00352588
A0A140TAA8	Nucleoporin NDC1 OS=Rattus norvegicus GN=Ndc1 PE=1 SV=1	1	1	0.771975	1.06242	0.825613	1.13624	0.949062	0.586792
Q6AYY8	Acetyl-coenzyme A transporter 1 OS=Rattus norvegicus GN=Slc33a1 PE=2 SV=1	1	1	1.05565	0.996522	1.18555	1.11914	1.08922	0.070963
Q01066	Calcium/calmodulin-dependent 3',5'-cyclic nucleotide phosphodiesterase 1B OS=Rattus norvegicus GN=Pde1b PE=1 SV=1	3	2	1.02881	1	0.925305	0.89939	0.963377	0.275174
Q56AP7	Protein cereblon OS=Rattus norvegicus GN=Crbn PE=1 SV=1	1	1	0.819163	0.916329	0.922492	1.03191	0.922475	0.12487
F1LWT1	Calcium-dependent secretion activator 2 OS=Rattus norvegicus GN=Cadps2 PE=4 SV=3	6	1	0.867332	0.88873	0.902077	0.924332	0.895618	0.000124584
Q4KLZ1	Transmembrane protein 186 OS=Rattus norvegicus GN=Tmem186 PE=2 SV=1	1	1	1.01331	0.818636	1.05913	0.855652	0.936682	0.322277
A0A0G2JV09	Synembryn-B OS=Rattus norvegicus GN=Ric8b PE=1 SV=1	3	3	1.25051	1.32033	1.05181	1.11054	1.1833	0.0251371
Q9Z2Q7	Syntaxin-8 OS=Rattus norvegicus GN=Stx8 PE=1 SV=1	2	2	1.02353	0.979832	1.03748	0.993186	1.00851	0.546015
G3V7H2	Multiple inositol polyphosphate phosphatase 1 OS=Rattus norvegicus GN=Minpp1 PE=3 SV=1	2	2	1.0322	0.971186	1.00828	0.948675	0.990086	0.614231
D4A0T0	NADH:ubiquinone oxidoreductase subunit B10 OS=Rattus norvegicus GN=Ndufb10 PE=1 SV=1	2	2	0.929771	0.931298	0.867521	0.868946	0.899384	0.00138983
B0BNN3	Carbonic anhydrase 1 OS=Rattus norvegicus GN=Ca1 PE=1 SV=1	2	2	1.01664	1.15973	0.947287	1.08062	1.05107	0.302752
D3ZXB8	Ethanolamine kinase 1 OS=Rattus norvegicus GN=Etnk1 PE=1 SV=1	1	1	1.04244	0.88455	1.23541	1.04829	1.05267	0.490569
B0BMU7	Elongator complex protein 5 OS=Rattus norvegicus GN=Elp5 PE=1 SV=1	1	1	0.878398	0.898426	0.923308	0.944361	0.911123	0.000828592
Q5XI26	Signal transducer and activator of transcription OS=Rattus norvegicus GN=Stat2 PE=1 SV=1	4	4	1.02159	1.07143	1.10018	1.15385	1.08676	0.0200695
D3ZUY0	Retinol dehydrogenase 14 (all-trans/9-cis/11-cis) OS=Rattus norvegicus GN=Rdh14 PE=1 SV=1	2	2	0.993548	1.27742	1.00326	1.2899	1.14103	0.137864
D3ZYQ0	Potassium channel tetramerization domain-containing 17 OS=Rattus norvegicus GN=Kctd17 PE=4 SV=1	1	1	0.896802	1.13517	0.889049	1.12536	1.0116	0.871246
Q6AYA1	H/ACA ribonucleoprotein complex subunit 1 OS=Rattus norvegicus GN=Gar1 PE=2 SV=1	2	2	0.808094	0.857702	0.97327	1.03302	0.918021	0.163492
D3ZXL5	Nuclear cap-binding subunit 3 OS=Rattus norvegicus GN=Ncbp3 PE=1 SV=1	2	2	1.08581	1.26445	0.96124	1.11938	1.10772	0.134737
Q7TPB7	MAL2A OS=Rattus norvegicus GN=Mal2 PE=2 SV=1	1	1	1.05612	1.4966	0.990431	1.40351	1.23667	0.108004
Q9JKS6	Protein piccolo OS=Rattus norvegicus GN=Pclo PE=1 SV=1	1	1	0.943769	0.922492	0.925484	0.90462	0.924091	7.88928e-05
A0A0G2JZV8	Synaptic functional regulator FMR1 OS=Rattus norvegicus GN=Fmr1 PE=1 SV=1	6	4	1.00648	1.16207	0.922734	1.06538	1.03917	0.466159
Q6AYS3	Carboxypeptidase OS=Rattus norvegicus GN=Ctsa PE=1 SV=1	2	2	0.993641	1.01431	0.880282	0.898592	0.946706	0.163178
A0A0G2K0T6	Gamma-synuclein OS=Rattus norvegicus GN=Sncg PE=1 SV=1	3	3	0.976672	1.03421	1.04841	1.11018	1.04237	0.173151
Q8CIR5	MNAT1, CDK-activating kinase assembly factor OS=Rattus norvegicus GN=Mnat1 PE=1 SV=1	1	1	0.937407	1.0924	0.998413	1.16349	1.04793	0.374794
Q9WTQ2	Podocalyxin OS=Rattus norvegicus GN=Podxl PE=1 SV=2	1	1	0.973765	0.777778	1.01774	0.812903	0.895547	0.126971
Q62997	GDNF family receptor alpha-1 OS=Rattus norvegicus GN=Gfra1 PE=1 SV=1	1	1	1.02423	1.09208	0.947683	1.01046	1.01862	0.552822
D3ZUP8	LMBR1 domain-containing 2 OS=Rattus norvegicus GN=Lmbrd2 PE=1 SV=1	1	1	1.15009	1.13743	1	0.988994	1.06913	0.160872
O55007	Ral GTPase-activating protein subunit alpha-1 OS=Rattus norvegicus GN=Ralgapa1 PE=1 SV=2	1	1	0.950673	0.991031	0.855989	0.892328	0.922505	0.041755
A0A0G2KAP1	Endoplasmic reticulum oxidoreductase 1 beta OS=Rattus norvegicus GN=Ero1b PE=1 SV=1	3	2	0.928571	0.899417	1.04598	1.01314	0.971775	0.445108
Q7TP99	Ab1-133 OS=Rattus norvegicus GN=Znfx1 PE=1 SV=1	2	2	0.990669	1.09642	0.885953	0.980529	0.988393	0.796456
D4A417	PDX1 C-terminal-inhibiting factor 1 OS=Rattus norvegicus GN=Pcif1 PE=1 SV=1	1	1	0.8738	0.99177	0.8738	0.99177	0.932785	0.095853
D3ZKK3	Consortin, connexin sorting protein OS=Rattus norvegicus GN=Cnst PE=1 SV=3	1	1	0.839685	1.04468	0.869388	1.08163	0.958846	0.524994
F1LNB3	A-kinase-anchoring protein 10 OS=Rattus norvegicus GN=Akap10 PE=1 SV=1	1	1	1.00156	1.13772	0.930233	1.05669	1.03155	0.498832
Q9Z1H9	Caveolae-associated protein 3 OS=Rattus norvegicus GN=Cavin3 PE=1 SV=1	1	1	0.960961	1.13213	0.830091	0.977951	0.975284	0.703244
G3V7R1	Nuclear pore complex protein Nup50 OS=Rattus norvegicus GN=Nup50 PE=1 SV=1	2	2	1.14439	1.00357	1.13628	0.99646	1.07017	0.134389
F1MAK9	Sphingomyelin phosphodiesterase 4 OS=Rattus norvegicus GN=Smpd4 PE=4 SV=3	2	2	0.593721	0.65374	0.914651	1.00711	0.792306	0.0828341
A0A0G2JU07	Ubiquitin-conjugating enzyme E2 variant 2 OS=Rattus norvegicus GN=Ube2v2 PE=1 SV=1	4	1	1.11419	1.07439	1.09524	1.05612	1.08499	0.000516121
D3ZZW1	Dedicator of cyto-kinesis 1 OS=Rattus norvegicus GN=Dock1 PE=1 SV=1	2	2	0.917379	0.945869	0.993827	1.02469	0.970442	0.264095
Q9WVR7	Protein phosphatase 1F OS=Rattus norvegicus GN=Ppm1f PE=2 SV=1	2	2	1.22306	1.06805	1.19373	1.04244	1.13182	0.0261321
F1M155	Supervillin OS=Rattus norvegicus GN=Svil PE=1 SV=3	1	1	1.19337	0.977901	1.0818	0.886477	1.03489	0.617102
A0JN29	Limb and neural patterns OS=Rattus norvegicus GN=Lnpk PE=1 SV=1	1	1	0.919492	0.95904	0.983384	1.02568	0.971899	0.253293
D3ZLT1	NADH dehydrogenase (Ubiquinone) 1 beta subcomplex, 7 (Predicted) OS=Rattus norvegicus GN=Ndufb7 PE=1 SV=1	2	2	0.886921	1.04632	0.862252	1.01722	0.953178	0.348389
D3ZD24	Spectrin repeat-containing, nuclear envelope family member 3 OS=Rattus norvegicus GN=Syne3 PE=4 SV=3	3	3	1.07237	1.1727	0.980451	1.07218	1.07442	0.10682
F1LMA7	C-type mannose receptor 2 OS=Rattus norvegicus GN=Mrc2 PE=1 SV=2	1	1	1.07237	0.995066	0.91573	0.849719	0.958221	0.420047
A0A0G2K1P1	Myotubularin-related protein 7 OS=Rattus norvegicus GN=Mtmr7 PE=1 SV=1	2	2	1.03155	1.1041	1.00615	1.07692	1.05468	0.0477144
D4A030	Upstream-binding protein 1 OS=Rattus norvegicus GN=Ubp1 PE=1 SV=1	1	1	1.33947	1.28425	1.02665	0.984326	1.15867	0.12688
A0A0A0MY22	Sialate O-acetylesterase OS=Rattus norvegicus GN=Siae PE=1 SV=1	1	1	0.926761	1.0169	0.945402	1.03736	0.981605	0.51936
F1LZB7	FERM domain-containing 4B OS=Rattus norvegicus GN=Frmd4b PE=1 SV=2	1	1	0.855657	0.911573	0.854545	0.91039	0.883041	0.000350142
Q64232	Very-long-chain enoyl-CoA reductase OS=Rattus norvegicus GN=Tecr PE=1 SV=1	2	2	1.01385	1.04615	1.2114	1.25	1.13035	0.0686418
Q8R424	STAM-binding protein OS=Rattus norvegicus GN=Stambp PE=2 SV=1	2	2	1.08746	1.14026	1.05272	1.10383	1.09607	0.00185877
D4ABB8	Probable phospholipid-transporting ATPase IIB OS=Rattus norvegicus GN=Atp9b PE=3 SV=1	4	2	1.01698	1.125	1.05104	1.16268	1.08892	0.0372406
F1LRY5	RCG45398 OS=Rattus norvegicus GN=Sardh PE=1 SV=2	2	2	1.04259	1.07256	1.05591	1.08626	1.06433	0.000518606
A0A0G2K0B0	Protein CDV3 homolog OS=Rattus norvegicus GN=Cdv3 PE=1 SV=1	3	3	0.9721	1.27606	0.892183	1.17116	1.07788	0.411944
Q6AXT8	Splicing factor 3A subunit 2 OS=Rattus norvegicus GN=Sf3a2 PE=2 SV=1	1	1	1.06935	0.970968	1.16112	1.05429	1.06393	0.151866
Q3SWT7	Nuclear receptor binding protein OS=Rattus norvegicus GN=Nrbp1 PE=1 SV=1	1	1	1.00607	0.962064	1.07282	1.02589	1.01671	0.494342
D4A9Z2	DNA topoisomerase OS=Rattus norvegicus GN=Top3b PE=1 SV=1	1	1	0.88518	1.17223	0.928571	1.22969	1.05392	0.554484
D4AE17	Mitogen-activated protein kinase kinase kinase 20 OS=Rattus norvegicus GN=Map3k20 PE=1 SV=1	1	1	0.939093	0.949008	0.832915	0.841709	0.890681	0.0123048
F1M241	DENN domain-containing 1A OS=Rattus norvegicus GN=Dennd1a PE=1 SV=2	1	1	1.04062	1.72188	0.944681	1.56312	1.31758	0.148101
Q6AXR1	TBC1 domain family, member 20 OS=Rattus norvegicus GN=Tbc1d20 PE=2 SV=1	1	1	0.892287	1.07048	0.95584	1.14672	1.01633	0.784084
D4ADD7	Glutaredoxin 5 OS=Rattus norvegicus GN=Glrx5 PE=1 SV=1	1	1	0.770023	0.897025	0.79645	0.927811	0.847827	0.00725357
M0RBS9	Sorting nexin family member 27, isoform CRA_a OS=Rattus norvegicus GN=Snx27 PE=1 SV=1	3	3	1.03058	1.20642	0.922025	1.07934	1.05959	0.351155
G3V648	1-acylglycerol-3-phosphate O-acyltransferase 3 OS=Rattus norvegicus GN=Agpat3 PE=1 SV=1	1	1	0.922131	0.822404	0.972622	0.867435	0.896148	0.0190389
P23711	Heme oxygenase 2 OS=Rattus norvegicus GN=Hmox2 PE=1 SV=1	1	1	1.1511	1.0798	1.13758	1.06711	1.1089	0.00195177
Q498S7	N-myc (And STAT) interactor OS=Rattus norvegicus GN=Nmi PE=2 SV=1	1	1	0.879377	1.05837	0.759239	0.913774	0.902689	0.165033
M0R3S1	Mitochondrial ribosomal protein S21-like OS=Rattus norvegicus GN=Mrps21l PE=4 SV=1	1	1	1.00592	0.920118	1.10032	1.00647	1.00821	0.830916
B0BNE1	Mediator of RNA polymerase II transcription subunit 6 OS=Rattus norvegicus GN=Med6 PE=2 SV=1	1	1	1.04135	1.12711	1	1.08235	1.0627	0.0611354
B1WBY7	ER lipid raft-associated 1 OS=Rattus norvegicus GN=Erlin1 PE=1 SV=1	4	1	0.953717	1.20477	0.826245	1.04374	1.00712	0.931627
F1LVV4	Regulator of chromosome condensation 2 OS=Rattus norvegicus GN=Rcc2 PE=1 SV=1	4	4	0.925575	0.875507	1.04587	0.989297	0.959063	0.312597
Q6AY19	Atypical kinase COQ8B, mitochondrial OS=Rattus norvegicus GN=Coq8b PE=1 SV=1	2	2	0.901445	0.927727	0.882883	0.908623	0.905169	5.08903e-05
Q8K3F0	Amino acid transporter OS=Rattus norvegicus PE=2 SV=1	1	1	1.00438	1.00292	1.02534	1.02385	1.01412	0.0586391
Q9R0W1	Pituitary homeobox 2 OS=Rattus norvegicus GN=Pitx2 PE=2 SV=1	1	1	0.997106	0.931983	1.02836	0.961194	0.97966	0.370083
A0A0G2KAD4	Protein LBH OS=Rattus norvegicus GN=Lbh PE=1 SV=1	1	1	0.903141	0.972513	0.891473	0.959948	0.931769	0.0149049
O70511	Ankyrin-3 OS=Rattus norvegicus GN=Ank3 PE=1 SV=3	5	3	0.984308	0.945792	0.858209	0.824627	0.903234	0.0405283
D4A315	Uncharacterized protein OS=Rattus norvegicus PE=3 SV=2	3	3	0.900913	0.926988	0.98433	1.01282	0.956263	0.1393
D3ZXB1	Mitogen-activated protein kinase kinase kinase kinase OS=Rattus norvegicus GN=Map4k2 PE=1 SV=1	1	1	1.08777	1.21317	0.921647	1.02789	1.06262	0.342851
D3ZYJ5	GRAM domain-containing 1B OS=Rattus norvegicus GN=Gramd1b PE=1 SV=1	1	1	1.16975	1.11933	1.09434	1.04717	1.10765	0.00559335
A0A0A0MXV3	Cell growth regulator with EF hand domain 1, isoform CRA_b OS=Rattus norvegicus GN=Cgref1 PE=1 SV=1	1	1	1.15973	1.15807	1.15017	1.14851	1.15412	2.42186e-09
D3ZXL1	Ariadne RBR E3 ubiquitin protein ligase 1 OS=Rattus norvegicus GN=Arih1 PE=1 SV=1	1	1	0.964039	1.08714	1.02199	1.15249	1.05642	0.215174
Q63362	NADH dehydrogenase [ubiquinone] 1 alpha subcomplex subunit 5 OS=Rattus norvegicus GN=Ndufa5 PE=1 SV=3	4	3	0.984485	0.93653	0.63978	0.608616	0.792353	0.0779019
A0A0G2K0S1	Calcium-binding and coiled-coil domain-containing protein 1 OS=Rattus norvegicus GN=Calcoco1 PE=1 SV=1	1	1	1.17875	1.25295	1.08372	1.15194	1.16684	0.00309811
F1LMY3	Receptor-type tyrosine-protein phosphatase zeta OS=Rattus norvegicus GN=Ptprz1 PE=1 SV=3	1	1	0.938255	0.997315	0.947154	1.00678	0.972375	0.162116
Q8K3P4	RNA-binding protein Musashi homolog 1 OS=Rattus norvegicus GN=Msi1 PE=2 SV=1	1	1	1.01742	0.939042	1.15677	1.06766	1.04522	0.36001
D3ZFQ1	Ataxin 7-like 3B OS=Rattus norvegicus GN=Atxn7l3b PE=1 SV=1	1	1	1.00143	0.988571	0.97905	0.96648	0.983883	0.0720792
D3ZUQ2	N(alpha)-acetyltransferase 10, NatA catalytic subunit OS=Rattus norvegicus GN=Naa10 PE=1 SV=1	2	2	1.05232	0.889387	1.04451	0.882789	0.967251	0.511197
D3ZPF2	Malonyl-CoA-acyl carrier protein transacylase OS=Rattus norvegicus GN=Mcat PE=1 SV=1	3	3	0.942436	1.01339	0.988764	1.0632	1.00195	0.94083
D3ZDD7	Spermatid perinuclear RNA binding protein, isoform CRA_a OS=Rattus norvegicus GN=Strbp PE=1 SV=1	7	3	0.874534	0.980124	0.965706	1.0823	0.975667	0.588121
B0K015	COMM domain containing 8 (Predicted), isoform CRA_a OS=Rattus norvegicus GN=Commd8 PE=1 SV=1	1	1	0.93617	0.918883	0.823392	0.808187	0.871658	0.00764813
A0A0U1RRU5	RCG59826 OS=Rattus norvegicus GN=Tab1 PE=1 SV=1	3	3	0.980529	1.08762	0.898089	0.996178	0.990604	0.816917
Q5U3Y2	RCG24403, isoform CRA_a OS=Rattus norvegicus GN=Smarcd3 PE=2 SV=1	1	1	0.901786	0.993622	0.914618	1.00776	0.954447	0.142333
G3V6Y6	Alpha-1,4 glucan phosphorylase OS=Rattus norvegicus GN=Pygb PE=1 SV=2	18	1	0.773667	1.04897	0.873464	1.18428	0.970093	0.754352
G3V7B0	Nucleolar protein 9 OS=Rattus norvegicus GN=Nol9 PE=4 SV=1	2	2	0.85119	0.889286	1.00281	1.04769	0.947742	0.302434
D4AC12	Ankyrin repeat and SAM domain containing 1 (Predicted) OS=Rattus norvegicus GN=Anks1a PE=1 SV=1	1	1	0.920206	0.926641	0.990305	0.99723	0.958595	0.0886839
F1LP81	Epithelial-splicing regulatory protein 1 OS=Rattus norvegicus GN=Esrp1 PE=4 SV=3	3	3	0.879607	0.850123	0.967568	0.935135	0.908108	0.0133878
B1H227	LOC682908 protein OS=Rattus norvegicus GN=Rcc1 PE=1 SV=1	2	2	0.854589	1.08462	0.914541	1.16071	1.00362	0.961307
P21913	Succinate dehydrogenase [ubiquinone] iron-sulfur subunit, mitochondrial OS=Rattus norvegicus GN=Sdhb PE=2 SV=2	1	1	0.960053	0.83755	1.09077	0.951589	0.959991	0.468995
D3ZWA1	Family with sequence similarity 63, member B OS=Rattus norvegicus GN=Mindy2 PE=1 SV=2	1	1	0.947438	1.0092	0.946194	1.00787	0.977676	0.256934
Q66HA5	Coiled-coil and C2 domain-containing protein 1A OS=Rattus norvegicus GN=Cc2d1a PE=1 SV=2	3	3	1.13543	1.16693	0.931525	0.957364	1.04781	0.457715
Q5EB90	Polymerase (RNA) II (DNA directed) polypeptide C, 33kDa OS=Rattus norvegicus GN=Polr2c PE=1 SV=1	3	3	0.878345	1.00608	0.840512	0.962747	0.921922	0.0853202
D3ZBB8	Cytoplasmic dynein 2 heavy chain 1 OS=Rattus norvegicus GN=Dync2h1 PE=4 SV=3	4	4	0.856635	1.00711	0.950066	1.11695	0.98269	0.76133
M0RB91	Queuine tRNA-ribosyltransferase accessory subunit 2 OS=Rattus norvegicus GN=Qtrt2 PE=1 SV=1	2	2	0.92112	0.986005	0.957672	1.02513	0.972482	0.257729
Q3ZAU5	DDHD domain-containing 1 OS=Rattus norvegicus GN=Ddhd1 PE=1 SV=1	1	1	0.909548	1.06407	0.95138	1.11301	1.0095	0.848019
Q5BJS6	Transmembrane protein 50B OS=Rattus norvegicus GN=Tmem50b PE=2 SV=1	1	1	0.876663	0.986699	0.871394	0.980769	0.928881	0.0660976
O89000	Dihydropyrimidine dehydrogenase [NADP(+)] OS=Rattus norvegicus GN=Dpyd PE=2 SV=1	1	1	0.979893	0.969169	1.00967	0.998619	0.989337	0.286106
D3ZV15	Cbl proto-oncogene OS=Rattus norvegicus GN=Cbl PE=1 SV=1	2	2	0.917293	0.97995	0.927757	0.991128	0.954032	0.0471282
Q5PQN1	Probable E3 ubiquitin-protein ligase HERC4 OS=Rattus norvegicus GN=Herc4 PE=2 SV=1	3	3	1.04708	1.13267	1.04558	1.13105	1.0891	0.0112597
F1LV01	WD repeat domain 19 OS=Rattus norvegicus GN=Wdr19 PE=4 SV=2	2	2	1.10693	1.05422	0.921053	0.877193	0.989848	0.857634
Q5M883	Chloride intracellular channel protein 2 OS=Rattus norvegicus GN=Clic2 PE=2 SV=1	1	1	0.822346	0.811173	1.05595	1.04161	0.93277	0.354931
D3ZW55	Inosine triphosphate pyrophosphatase OS=Rattus norvegicus GN=Itpa PE=3 SV=1	4	4	0.922306	0.85213	0.947233	0.875161	0.899207	0.00349825
Q2YDU8	Protein spinster homolog 1 OS=Rattus norvegicus GN=Spns1 PE=2 SV=2	1	1	0.971053	0.934211	0.985314	0.947931	0.959627	0.012426
P13601	Aldehyde dehydrogenase, cytosolic 1 OS=Rattus norvegicus GN=Aldh1a7 PE=1 SV=2	11	2	0.622054	1.04714	0.782839	1.3178	0.942457	0.719341
E9PTE5	Zinc finger MYM-type-containing 3 OS=Rattus norvegicus GN=Zmym3 PE=1 SV=1	3	3	0.993289	1.11275	0.99865	1.11876	1.05586	0.157726
Q5U2U9	CCR4-NOT transcription complex, subunit 8 OS=Rattus norvegicus GN=Cnot8 PE=2 SV=1	1	1	0.922886	0.922886	1.02204	1.02204	0.972462	0.373158
Q5PPJ4	Deoxyhypusine hydroxylase OS=Rattus norvegicus GN=Dohh PE=2 SV=1	1	1	0.976316	0.894737	0.936869	0.858586	0.916627	0.017122
A2RRU1	Glycogen [starch] synthase, muscle OS=Rattus norvegicus GN=Gys1 PE=1 SV=1	1	1	1.0702	1.13754	0.94557	1.00506	1.03959	0.375775
Q7TQ89	Ac1055 OS=Rattus norvegicus GN=Il6st PE=2 SV=1	1	1	0.958922	1.07574	0.904358	1.01453	0.988387	0.762948
O08836	Immunoglobulin-binding protein 1 OS=Rattus norvegicus GN=Igbp1 PE=2 SV=2	1	1	0.877791	0.985899	0.862587	0.968822	0.923775	0.0507291
M0R637	tRNA (guanine-N(7)-)-methyltransferase OS=Rattus norvegicus GN=Mettl1 PE=1 SV=2	1	1	0.860759	1.0069	0.85	0.994318	0.927996	0.137754
Q4FZV0	Beta-mannosidase OS=Rattus norvegicus GN=Manba PE=2 SV=1	2	2	0.976654	1.07393	0.985602	1.08377	1.02999	0.330707
B2RZ68	DDB1 and CUL4-associated factor 7 OS=Rattus norvegicus GN=Dcaf7 PE=1 SV=1	1	1	1.06056	1.17746	0.956798	1.06226	1.06427	0.203789
Q9Z340	Partitioning defective 3 homolog OS=Rattus norvegicus GN=Pard3 PE=1 SV=1	1	1	1.01074	1.22819	0.869515	1.05658	1.04126	0.597055
F8WG88	Follistatin-related protein 1 OS=Rattus norvegicus GN=Fstl1 PE=4 SV=3	1	1	0.820261	0.940087	0.837597	0.959956	0.889475	0.020455
A0A140UHW6	tRNA (guanine(26)-N(2))-dimethyltransferase OS=Rattus norvegicus GN=Trmt1 PE=1 SV=1	3	3	1.01208	0.919463	1.07102	0.973011	0.993894	0.854787
Q5FVG2	Band 4.1-like protein 5 OS=Rattus norvegicus GN=Epb41l5 PE=2 SV=2	1	1	1.01617	1.22642	0.984334	1.18799	1.10373	0.137816
Q2KN99	Cytospin-A OS=Rattus norvegicus GN=Specc1l PE=1 SV=1	2	2	0.832415	0.983462	0.862857	1.01943	0.924541	0.147784
D3ZGX8	Bromodomain-containing 4 OS=Rattus norvegicus GN=Brd4 PE=1 SV=2	2	2	1.00798	0.978723	1.02294	0.993252	1.00072	0.941804
Q6P762	Alpha-mannosidase OS=Rattus norvegicus GN=Man2b1 PE=1 SV=1	3	3	0.900592	1.0355	1.07486	1.23588	1.06171	0.405679
O35077	Glycerol-3-phosphate dehydrogenase [NAD(+)], cytoplasmic OS=Rattus norvegicus GN=Gpd1 PE=1 SV=4	2	2	1.01736	0.979973	1.11404	1.0731	1.04612	0.170753
Q5M9G1	Protein HEXIM1 OS=Rattus norvegicus GN=Hexim1 PE=1 SV=1	2	2	0.933905	0.979192	0.98072	1.02828	0.980524	0.351142
A0A0G2K6F1	T-complex 11-like 1 OS=Rattus norvegicus GN=Tcp11l1 PE=1 SV=1	2	2	1.02811	1.17269	0.871737	0.994325	1.01672	0.796168
Q02769	Squalene synthase OS=Rattus norvegicus GN=Fdft1 PE=2 SV=1	1	1	1.2304	1.208	1.0013	0.983073	1.10569	0.159321
A3KNA0	Aqr protein OS=Rattus norvegicus GN=Aqr PE=1 SV=1	1	1	0.871882	1.00227	0.915476	1.05238	0.960502	0.3714
P30121	Metalloproteinase inhibitor 2 OS=Rattus norvegicus GN=Timp2 PE=1 SV=3	1	1	0.821581	1.00962	0.879863	1.08124	0.948074	0.414762
D3ZN39	Ubiquitin specific protease 8 (Predicted) OS=Rattus norvegicus GN=Usp8 PE=1 SV=2	1	1	1.07692	1.25455	0.9601	1.11845	1.10251	0.142575
A0A0G2JW29	alpha-1,2-Mannosidase OS=Rattus norvegicus GN=Man1a1 PE=1 SV=1	1	1	0.875995	1.16951	0.819149	1.09362	0.989568	0.905484
Q5BJT0	Arginine and glutamate-rich protein 1 OS=Rattus norvegicus GN=Arglu1 PE=1 SV=1	2	2	1.0433	1.14885	0.998705	1.09974	1.07265	0.0683482
D3ZIE5	SWI/SNF-related, matrix-associated, actin-dependent regulator of chromatin, subfamily a, member 1 OS=Rattus norvegicus GN=Smarca1 PE=3 SV=3	4	2	0.992298	1.00385	1.06327	1.07565	1.03377	0.157212
A0A0G2JUH4	Polynucleotide kinase 3'-phosphatase OS=Rattus norvegicus GN=Pnkp PE=1 SV=1	1	1	0.875425	0.861835	0.965044	0.950062	0.913091	0.0155604
F1MA54	[Pyruvate dehydrogenase (acetyl-transferring)] kinase isozyme 1, mitochondrial OS=Rattus norvegicus GN=Pdk1 PE=1 SV=2	1	1	0.953144	1.15166	0.850385	1.0275	0.995674	0.947835
Q6MGB5	Estradiol 17-beta-dehydrogenase 8 OS=Rattus norvegicus GN=Hsd17b8 PE=1 SV=1	2	2	0.892734	0.883506	1.01442	1.00393	0.948647	0.193359
A0A0G2K6N8	Poly(A)-specific ribonuclease OS=Rattus norvegicus GN=Parn PE=1 SV=2	1	1	1.09014	1.18169	0.934783	1.01329	1.05497	0.33807
D4A6L1	TAP binding protein-like (Predicted) OS=Rattus norvegicus GN=Tapbpl PE=1 SV=1	2	2	1.14985	1.11128	1.14138	1.10309	1.1264	3.12874e-05
P19527	Neurofilament light polypeptide OS=Rattus norvegicus GN=Nefl PE=1 SV=3	5	4	0.680105	0.788782	0.874859	1.01466	0.839601	0.0636577
O54880	Rab effector Noc2 OS=Rattus norvegicus GN=Rph3al PE=1 SV=1	3	3	0.981156	0.961055	1.05114	1.02961	1.00574	0.792583
Q641Y5	Ubiquitin-like modifier-activating enzyme ATG7 OS=Rattus norvegicus GN=Atg7 PE=2 SV=1	4	4	1.07713	1.14876	1.04267	1.112	1.09514	0.00585777
M0R715	Patatin-like phospholipase domain-containing 6 OS=Rattus norvegicus GN=Pnpla6 PE=1 SV=1	1	1	1.02089	1.11488	0.953659	1.04146	1.03272	0.362223
A0A0G2K9Y9	Zinc finger protein 326 OS=Rattus norvegicus GN=Zfp326 PE=1 SV=1	2	2	0.951338	1.07178	0.908246	1.02323	0.988647	0.766127
A0A0G2JZA2	GrpE protein homolog OS=Rattus norvegicus GN=Grpel1 PE=1 SV=1	2	2	1.02887	0.961942	1.05235	0.983893	1.00676	0.753961
D4A0Y4	Oxidoreductase NAD-binding domain containing 1 (Predicted), isoform CRA_b OS=Rattus norvegicus GN=Oxnad1 PE=1 SV=1	1	1	0.942308	1.125	0.898053	1.07216	1.00938	0.866293
Q4G009	Malignant T-cell-amplified sequence 1 OS=Rattus norvegicus GN=Mcts1 PE=2 SV=1	1	1	0.790534	0.863041	0.903337	0.986191	0.885776	0.0311909
D4AEE9	Transcription elongation factor 1 homolog OS=Rattus norvegicus GN=Elof1 PE=3 SV=1	1	1	1.04521	0.982713	1.00383	0.943806	0.993891	0.78238
B1H282	Collagen beta(1-O)galactosyltransferase 1 OS=Rattus norvegicus GN=Colgalt1 PE=1 SV=1	2	2	0.916473	1.22042	0.937129	1.24792	1.08049	0.400704
A0A0G2JXG7	Capping protein regulator and myosin 1 linker 1 OS=Rattus norvegicus GN=Carmil1 PE=1 SV=1	1	1	1.01671	1.29563	0.966993	1.23227	1.1279	0.162095
D3ZMY7	5'-nucleotidase, cytosolic II OS=Rattus norvegicus GN=Nt5c2 PE=1 SV=3	1	1	0.886034	1.12402	0.793	1.006	0.952264	0.531743
A0A0G2KAL9	Mitochondrial fission factor OS=Rattus norvegicus GN=Mff PE=1 SV=1	2	2	1	1.12343	0.952038	1.06954	1.03625	0.374148
Q5XI07	Lipoma-preferred partner homolog OS=Rattus norvegicus GN=Lpp PE=1 SV=1	1	1	1.2655	1.12083	1.03377	0.915584	1.08392	0.298275
P19356	Porphobilinogen deaminase OS=Rattus norvegicus GN=Hmbs PE=1 SV=2	4	4	1.00378	0.824937	1.11158	0.913529	0.963455	0.573486
D4A7R3	Nucleoporin 205 OS=Rattus norvegicus GN=Nup205 PE=1 SV=1	8	8	0.935446	1.06338	0.924594	1.05104	0.993616	0.86823
A0A1W2Q655	Zinc finger and BTB domain containing 20 (Predicted), isoform CRA_c OS=Rattus norvegicus GN=Zbtb20 PE=1 SV=1	1	1	0.985167	1.06922	0.916092	0.994253	0.991183	0.787805
D3ZTW7	ATP synthase mitochondrial F1 complex assembly factor 2 OS=Rattus norvegicus GN=Atpaf2 PE=1 SV=1	1	1	1.06109	1.09429	1.0063	1.03778	1.04986	0.0363684
A0A0G2K199	Leprecan 1, isoform CRA_c OS=Rattus norvegicus GN=P3h1 PE=1 SV=1	2	2	0.990087	0.909542	0.913143	0.838857	0.912907	0.0303817
Q3ZAV2	Nuclease-sensitive element-binding protein 1 OS=Rattus norvegicus GN=Ybx1 PE=1 SV=1	2	1	0.930314	0.981417	0.931395	0.982558	0.956421	0.0255586
Q9EQH5-2	Isoform 2 of C-terminal-binding protein 2 OS=Rattus norvegicus GN=Ctbp2	4	1	1.12291	1.18994	0.957143	1.01429	1.07107	0.22427
G3V8X8	Noggin OS=Rattus norvegicus GN=Nog PE=3 SV=1	1	1	0.85291	0.940741	0.912797	1.0068	0.928311	0.0659236
B2GV05	RNA-binding protein 5 OS=Rattus norvegicus GN=Rbm5 PE=1 SV=1	4	3	1.15121	1.09986	1.08907	1.04049	1.09516	0.00575191
D2XV59	GTP-binding protein 1 OS=Rattus norvegicus GN=Gtpbp1 PE=1 SV=1	4	4	1.04534	0.994819	0.960714	0.914286	0.978789	0.47207
Q4KLG9	AN1-type zinc finger protein 2B OS=Rattus norvegicus GN=Zfand2b PE=1 SV=1	2	2	1.00874	0.873908	1.00248	0.868486	0.938404	0.163843
D4A4X6	ADAMTS-like 2 OS=Rattus norvegicus GN=Adamtsl2 PE=4 SV=1	1	1	1	0.945545	0.953955	0.902007	0.950377	0.0483698
D4A3P1	Ubiquilin 4 OS=Rattus norvegicus GN=Ubqln4 PE=1 SV=1	3	1	1.04118	1.12999	0.923516	1.00228	1.02424	0.592593
Q5U2Q7	Eukaryotic peptide chain release factor subunit 1 OS=Rattus norvegicus GN=Etf1 PE=2 SV=3	5	5	1.01122	1.01746	1.05325	1.05974	1.03542	0.0281396
Q4QQW0	Igh-6 protein (Fragment) OS=Rattus norvegicus GN=Igh-6 PE=2 SV=1	2	1	1.27918	1.17981	0.797443	0.735497	0.997983	0.988628
Q5U2X0	CDKN2A-interacting protein OS=Rattus norvegicus GN=Cdkn2aip PE=1 SV=1	1	1	0.837113	0.919588	0.919592	1.01019	0.921621	0.0684545
D3ZPQ4	Putative uncharacterized protein RGD1560157_predicted OS=Rattus norvegicus GN=Zfp800 PE=1 SV=1	1	1	0.969011	0.986889	0.886587	0.902944	0.936358	0.0408923
P53565	Homeobox protein cut-like 1 OS=Rattus norvegicus GN=Cux1 PE=1 SV=2	3	3	1.0753	1.1889	0.962175	1.06383	1.07255	0.168723
G3V7B5	Phosphoribosyl pyrophosphate synthase-associated protein 1 OS=Rattus norvegicus GN=Prpsap1 PE=1 SV=1	2	1	0.92622	0.955732	0.923077	0.952489	0.939379	0.000396245
D3ZAI0	U2 snRNP-associated SURP domain-containing OS=Rattus norvegicus GN=U2surp PE=1 SV=1	2	2	1.01493	1.12562	0.904656	1.00333	1.01213	0.797369
D4A8H5	Protein phosphatase 4, regulatory subunit 2 OS=Rattus norvegicus GN=Ppp4r2 PE=1 SV=2	2	2	1.24164	1.07447	1.18406	1.02464	1.1312	0.0383735
D3ZLC3	Sperm specific antigen 2 (Predicted) OS=Rattus norvegicus GN=Ssfa2 PE=1 SV=1	1	1	1.03279	1.01765	0.986747	0.972289	1.00237	0.869953
Q5XIG0	ADP-ribose pyrophosphatase, mitochondrial OS=Rattus norvegicus GN=Nudt9 PE=2 SV=1	2	2	0.677419	0.750207	0.941379	1.04253	0.852884	0.131288
D3ZJH2	SURP and G patch domain-containing 2 OS=Rattus norvegicus GN=Sugp2 PE=1 SV=1	2	2	1.00367	0.973072	0.97619	0.946429	0.974841	0.0751207
A0A0G2K3I9	Dual-specificity phosphatase 3 OS=Rattus norvegicus GN=Dusp3 PE=1 SV=1	3	3	0.901207	1.04281	1.00984	1.16851	1.03059	0.59838
P35233	Tyrosine-protein phosphatase non-receptor type 2 OS=Rattus norvegicus GN=Ptpn2 PE=1 SV=2	1	1	0.852697	0.914938	0.875399	0.939297	0.895583	0.00170703
P20767	Ig lambda-2 chain C region OS=Rattus norvegicus PE=4 SV=1	2	2	1.12585	0.984952	0.975118	0.853081	0.984752	0.793746
Q920F5	Malonyl-CoA decarboxylase, mitochondrial OS=Rattus norvegicus GN=Mlycd PE=1 SV=1	1	1	1.02109	1.10298	0.971665	1.04959	1.03633	0.233619
Q62967	Diphosphomevalonate decarboxylase OS=Rattus norvegicus GN=Mvd PE=1 SV=1	2	2	1.03909	0.984868	1.00857	0.955936	0.997116	0.875579
Q568Y6	DNA methyltransferase 1-associated protein 1 OS=Rattus norvegicus GN=Dmap1 PE=1 SV=1	1	1	1.02488	0.909204	0.951501	0.844111	0.932423	0.124964
B0BN65	Family with sequence similarity 49, member A OS=Rattus norvegicus GN=Fam49a PE=1 SV=1	1	1	1.01348	1.06985	1.0671	1.12645	1.06922	0.0239983
Q5U2V8	ER membrane protein complex subunit 3 OS=Rattus norvegicus GN=Emc3 PE=2 SV=3	1	1	1.05478	1.14013	0.969555	1.04801	1.05312	0.178406
Q62718	Neurotrimin OS=Rattus norvegicus GN=Ntm PE=1 SV=1	2	2	1.14938	0.947441	0.985765	0.812574	0.97379	0.718357
Q7TN78	Acyl-coenzyme A synthetase ACSM4, mitochondrial OS=Rattus norvegicus GN=Acsm4 PE=2 SV=1	1	1	0.875659	1.11802	0.811523	1.03613	0.960333	0.594905
A0A0G2K4G0	Retinoic acid-induced 1 OS=Rattus norvegicus GN=Rai1 PE=1 SV=1	1	1	1.00971	0.906553	0.965197	0.866589	0.937012	0.0931137
D3ZX08	Alanine--tRNA ligase, mitochondrial OS=Rattus norvegicus GN=Aars2 PE=3 SV=1	3	3	0.926503	1.09911	0.902386	1.0705	0.999624	0.994223
D3ZAZ0	Eukaryotic translation initiation factor 3 subunit M OS=Rattus norvegicus GN=Eif3m PE=1 SV=1	1	1	0.998802	0.926946	1.1061	1.02653	1.01459	0.70707
Q63616	Vacuolar protein sorting-associated protein 33B OS=Rattus norvegicus GN=Vps33b PE=2 SV=1	4	4	1.0706	0.983312	0.969767	0.890698	0.978595	0.582437
D3ZM09	Seryl-tRNA synthetase 2 (Predicted) OS=Rattus norvegicus GN=Sars2 PE=1 SV=1	1	1	0.981199	1.15276	0.891142	1.04696	1.01802	0.754855
A0A0G2K5L1	FAT atypical cadherin 1 OS=Rattus norvegicus GN=Fat1 PE=1 SV=1	1	1	1.09138	1.0718	1.12064	1.10054	1.09609	7.87981e-05
D3ZYG0	Vav guanine nucleotide exchange factor 2 OS=Rattus norvegicus GN=Vav2 PE=1 SV=1	1	1	1.05949	0.955696	1.04625	0.94375	1.0013	0.966904
D3ZKC9	Similar to mKIAA1429 protein OS=Rattus norvegicus GN=Virma PE=1 SV=3	2	2	1.01578	1.08131	1.04234	1.10959	1.06225	0.0239447
B5DFN4	Prefoldin 5 (Predicted), isoform CRA_a OS=Rattus norvegicus GN=Pfdn5 PE=1 SV=1	2	2	0.973256	0.976744	0.95439	0.957811	0.96555	0.000803701
A1A5R1	RNA binding protein fox-1 homolog 2 OS=Rattus norvegicus GN=Rbfox2 PE=2 SV=1	1	1	0.95881	1.06293	1.05409	1.16855	1.0611	0.204071
Q4V8E4	Cilia- and flagella-associated protein 36 OS=Rattus norvegicus GN=Cfap36 PE=1 SV=1	4	4	0.975581	1.04302	1.04613	1.11845	1.0458	0.16757
G3V7V9	Leucine carboxyl methyltransferase 1 OS=Rattus norvegicus GN=Lcmt1 PE=1 SV=1	1	1	0.872539	0.959585	0.903433	0.993562	0.93228	0.0473974
D3ZSY8	TBC1 domain family, member 10b OS=Rattus norvegicus GN=Tbc1d10b PE=1 SV=1	2	2	0.996458	0.98111	1.07243	1.05591	1.02648	0.278881
B0BNB4	MYST/Esa1-associated factor 6 OS=Rattus norvegicus GN=Meaf6 PE=1 SV=1	1	1	0.946607	0.926585	0.996487	0.97541	0.961272	0.0459425
D3ZF54	Anoctamin OS=Rattus norvegicus GN=Ano10 PE=1 SV=2	2	2	0.8074	1.04649	0.867482	1.12436	0.961434	0.622525
B5DFD8	SH3 domain-binding glutamic acid-rich-like protein OS=Rattus norvegicus GN=Sh3bgrl PE=1 SV=1	2	2	0.97931	1.16092	1.12848	1.33775	1.15161	0.0849722
B2RZ66	Signal recognition particle 19 OS=Rattus norvegicus GN=Srp19 PE=1 SV=1	1	1	1.07286	1.07412	0.989571	0.99073	1.03182	0.234168
Q4QQU5	Protein YIPF6 OS=Rattus norvegicus GN=Yipf6 PE=1 SV=1	1	1	1.04015	0.928224	1.01665	0.907253	0.973067	0.440122
A0A0G2QC27	Nucleolar protein 6 OS=Rattus norvegicus GN=Nol6 PE=1 SV=1	1	1	1.05948	0.960347	1.01303	0.918246	0.987777	0.704983
F1LRL4	Similar to TBC1 domain family, member 8; BUB2-like protein 1; vascular Rab-GAP/TBC-containing (Predicted), isoform CRA_a OS=Rattus norvegicus GN=Tbc1d9b PE=1 SV=2	3	3	0.944873	0.949283	0.966178	0.970688	0.957756	0.0005331
A0A292G0W2	Gai-interacting protein OS=Rattus norvegicus GN=Phf24 PE=4 SV=1	1	1	0.867409	1.07692	0.788408	0.978841	0.927895	0.297345
Q8CG07	ATPase WRNIP1 OS=Rattus norvegicus GN=Wrnip1 PE=1 SV=1	2	2	0.996516	1.00465	0.906019	0.913411	0.955148	0.139327
F1LSG8	Syndetin OS=Rattus norvegicus GN=Vps50 PE=1 SV=1	1	1	0.973893	1.06924	0.863179	0.947686	0.963499	0.422683
G3V9N7	Protein kinase C and casein kinase substrate in neurons 3 OS=Rattus norvegicus GN=Pacsin3 PE=1 SV=3	1	1	0.842829	1.01277	0.852883	1.02485	0.933333	0.226309
Q497A2	D-serine modulator-1 OS=Rattus norvegicus GN=Slc35b2 PE=1 SV=1	1	1	1.1273	1.05906	1.13926	1.07029	1.09898	0.00263628
D3ZM26	MDS1 and EVI1 complex locus OS=Rattus norvegicus GN=Mecom PE=1 SV=2	1	1	1.03494	1.07831	1.01417	1.05667	1.04602	0.0158282
D3Z865	Mannose-P-dolichol utilization defect 1 OS=Rattus norvegicus GN=Mpdu1 PE=1 SV=1	1	1	0.988493	0.952819	0.88193	0.850103	0.918336	0.0421888
G3V9M3	RCG28460 OS=Rattus norvegicus GN=Wdr47 PE=1 SV=1	1	1	0.945055	1.01319	0.951327	1.01991	0.98237	0.408033
D3KR63	cAMPS OS=Rattus norvegicus GN=Rapgef4 PE=2 SV=1	2	2	1.03486	1.13462	0.990794	1.08631	1.06164	0.0954656
A0A0G2KA69	Protein SDE2 homolog OS=Rattus norvegicus GN=Sde2 PE=1 SV=1	1	1	0.985143	1.05257	0.917021	0.979787	0.983631	0.576107
A0A0G2K7P2	PHD finger protein 14 OS=Rattus norvegicus GN=Phf14 PE=1 SV=1	1	1	0.957778	0.976667	0.914104	0.932131	0.94517	0.00734611
F1LQI6	Zyg-11-related, cell cycle regulator OS=Rattus norvegicus GN=Zer1 PE=1 SV=1	1	1	1.05103	0.933171	1.12924	1.00261	1.02901	0.508128
D4A5D4	Microtubule crosslinking factor 1 OS=Rattus norvegicus GN=Mtcl1 PE=1 SV=3	2	1	1.00581	0.981395	0.996544	0.97235	0.989026	0.193638
G3V927	Discs, large homolog-associated protein 4 (Drosophila) OS=Rattus norvegicus GN=Dlgap4 PE=1 SV=1	1	1	0.971942	0.874299	0.940282	0.84582	0.908086	0.019489
F1LP26	Shroom family member 3 OS=Rattus norvegicus GN=Shroom3 PE=1 SV=3	1	1	1.01049	1.08858	0.973064	1.04826	1.0301	0.270686
Q6P752	Torsin-1A-interacting protein 2 OS=Rattus norvegicus GN=Tor1aip2 PE=2 SV=1	1	1	1.04077	0.930456	1.13168	1.01173	1.02866	0.515863
Q7TQ75	Microtubule-associated protein 1 light chain 3 beta OS=Rattus norvegicus GN=Map1lc3b PE=2 SV=1	1	1	1.01639	1.11007	1.0152	1.10877	1.06261	0.0597407
D4ADP9	Coatomer protein complex, subunit zeta 2 OS=Rattus norvegicus GN=Copz2 PE=1 SV=2	1	1	1.08085	0.945274	1.16801	1.02151	1.05391	0.295785
D3ZDW3	TSC22 domain family, member 2 OS=Rattus norvegicus GN=Tsc22d2 PE=1 SV=1	1	1	1.0023	1.00922	0.908142	0.914405	0.958517	0.180016
Q5XI27	Accs protein (Fragment) OS=Rattus norvegicus GN=Accs PE=2 SV=1	1	1	1.16578	1.07353	1.05697	0.973333	1.0674	0.138371
A0A0A0MY07	Ubiquitin carboxyl-terminal hydrolase 15 OS=Rattus norvegicus GN=Usp15 PE=1 SV=1	3	3	0.855741	0.910697	0.94577	1.00651	0.929679	0.0677492
M0RDH0	Glycine N-methyltransferase OS=Rattus norvegicus GN=LOC100911564 PE=3 SV=1	1	1	1.0381	1.00833	0.92569	0.899151	0.967817	0.367148
B1WC53	Ift52 protein OS=Rattus norvegicus GN=Ift52 PE=2 SV=1	1	1	0.655405	0.570571	1.07512	0.935961	0.809265	0.157441
D3ZT52	Polybromo 1 OS=Rattus norvegicus GN=Pbrm1 PE=1 SV=2	2	2	0.984216	1.09921	0.909375	1.01562	1.00211	0.958984
F1M943	Armadillo repeat-containing 8 OS=Rattus norvegicus GN=Armc8 PE=1 SV=2	2	2	1.13212	1.01943	0.958333	0.862939	0.993207	0.908059
B1WBU9	Alpha-1,4 glucan phosphorylase OS=Rattus norvegicus GN=Pygm PE=2 SV=1	3	2	0.857704	0.930324	0.914226	0.991632	0.923471	0.0320615
A0A140TAF7	Protein O-glucosyltransferase 1 OS=Rattus norvegicus GN=Poglut1 PE=1 SV=1	3	3	0.922269	0.955882	1.03783	1.07565	0.997907	0.954894
A0A0G2JZR1	Oxysterol-binding protein OS=Rattus norvegicus GN=Osbpl6 PE=1 SV=1	1	1	1.19945	1.11066	1.02212	0.946449	1.06967	0.250266
Q810U0	Coiled-coil domain-containing protein 50 OS=Rattus norvegicus GN=Ccdc50 PE=2 SV=1	1	1	0.7695	1.11656	0.923239	1.33964	1.03724	0.772838
Q5PQX0	UDP-glucuronic acid decarboxylase 1 OS=Rattus norvegicus GN=Uxs1 PE=1 SV=1	2	2	0.918665	1.23253	0.940235	1.26147	1.08823	0.37443
F1LMJ8	Calcium uptake protein 2, mitochondrial OS=Rattus norvegicus GN=Micu2 PE=1 SV=1	1	1	0.890121	0.955645	0.870809	0.934911	0.912872	0.00433353
Q4KLN4	Nucleoporin GLE1 OS=Rattus norvegicus GN=Gle1 PE=2 SV=1	1	1	0.993258	0.962921	0.93545	0.906878	0.949627	0.0345398
Q9JKL8	Activity-dependent neuroprotector homeobox protein OS=Rattus norvegicus GN=Adnp PE=1 SV=2	3	3	0.964091	0.973885	1.00454	1.01474	0.989313	0.410516
D4ADD8	Dynactin 6 (Predicted), isoform CRA_b OS=Rattus norvegicus GN=Dctn6 PE=1 SV=1	2	2	1.00682	1.1625	0.949625	1.09646	1.05385	0.297069
A0A0G2JXP1	Glycogenin-1 OS=Rattus norvegicus GN=Gyg1 PE=1 SV=1	3	3	0.9279	0.928945	1.04225	1.04343	0.985631	0.67877
Q8VHJ9	Nesprin-1 OS=Rattus norvegicus GN=Syne1 PE=2 SV=1	7	7	1.01024	1.14676	0.951768	1.08039	1.04729	0.306508
A0A140TAD1	ADP-sugar pyrophosphatase OS=Rattus norvegicus GN=Nudt5 PE=1 SV=1	2	2	1.08425	1.17827	0.921162	1.00104	1.04618	0.434875
Q62658	Peptidyl-prolyl cis-trans isomerase FKBP1A OS=Rattus norvegicus GN=Fkbp1a PE=1 SV=3	1	1	0.90081	0.930162	0.970556	1.00218	0.950927	0.0698285
Q5RK19	Vacuolar-sorting protein SNF8 OS=Rattus norvegicus GN=Snf8 PE=1 SV=1	1	1	0.977024	0.963895	1.04567	1.03162	1.00455	0.828157
Q99J86	Attractin OS=Rattus norvegicus GN=Atrn PE=2 SV=1	1	1	1.11042	1.0397	0.933264	0.873827	0.989304	0.846677
A3FM27	Chloride intracellular channel protein OS=Rattus norvegicus GN=Clic4 PE=2 SV=1	4	4	0.952128	1.07979	0.802691	0.910314	0.93623	0.308145
A0A0G2K5Y1	RCG20801, isoform CRA_c OS=Rattus norvegicus GN=Vipas39 PE=1 SV=1	2	2	1.01356	1.11412	1.08596	1.1937	1.10184	0.0339562
Q66H79	Tripartite motif protein 32 OS=Rattus norvegicus GN=Trim32 PE=1 SV=1	1	1	0.89521	0.94511	0.942227	0.994748	0.944324	0.0337981
F1LVT5	RUN domain-containing 1 OS=Rattus norvegicus GN=Rundc1 PE=4 SV=2	1	1	0.952381	1.15238	1.01237	1.22497	1.08553	0.220715
F1LSP9	FGGY carbohydrate kinase domain-containing OS=Rattus norvegicus GN=Fggy PE=1 SV=1	1	1	0.76661	0.893526	0.924974	1.07811	0.915805	0.236485
P29066	Beta-arrestin-1 OS=Rattus norvegicus GN=Arrb1 PE=1 SV=1	1	1	1.04889	1.13504	1.05875	1.14571	1.0971	0.00837009
Q63068	Phosphorylated adapter RNA export protein OS=Rattus norvegicus GN=Phax PE=1 SV=2	3	3	1.04032	0.976959	0.994493	0.933921	0.986424	0.560116
Q9JI92	Syntenin-1 OS=Rattus norvegicus GN=Sdcbp PE=1 SV=1	2	2	1.10784	1.07843	0.989059	0.962801	1.03453	0.359076
P46413	Glutathione synthetase OS=Rattus norvegicus GN=Gss PE=1 SV=1	4	4	1.05731	1.40702	0.930999	1.23893	1.15856	0.178806
F7EZ89	TBC1 domain family, member 15 OS=Rattus norvegicus GN=Tbc1d15 PE=1 SV=2	3	3	1.19236	1.05007	1.24313	1.09478	1.14508	0.0167177
F1LND1	Component of oligomeric golgi complex 1 OS=Rattus norvegicus GN=Cog1 PE=1 SV=1	2	2	0.952632	0.874737	0.967914	0.88877	0.921013	0.0140497
D3Z9I1	Cytochrome C oxidase assembly factor 3 OS=Rattus norvegicus GN=Coa3 PE=1 SV=1	1	1	1.03657	1.20914	1.01454	1.18345	1.11093	0.0673795
Q920P6	Adenosine deaminase OS=Rattus norvegicus GN=Ada PE=1 SV=3	1	1	0.91911	1.23054	0.879961	1.17812	1.05193	0.580781
A0A0G2QC33	Cysteine protease OS=Rattus norvegicus GN=Atg4b PE=1 SV=1	2	2	0.935385	0.918974	1.12454	1.10481	1.02093	0.713632
Q8VGC3	Voltage-dependent L-type calcium channel subunit beta-2 OS=Rattus norvegicus GN=Cacnb2 PE=1 SV=2	1	1	0.96	1.19789	0.937307	1.16958	1.0662	0.369659
D4A9P7	BolA family member 2 OS=Rattus norvegicus GN=Bola2 PE=1 SV=1	3	3	1.10145	2.06039	0.855535	1.60038	1.40444	0.181983
Q66H46	RCG19966 OS=Rattus norvegicus GN=Tspyl4 PE=2 SV=1	1	1	1.5066	1.16502	1.18726	0.918075	1.19424	0.158602
P50430	Arylsulfatase B OS=Rattus norvegicus GN=Arsb PE=2 SV=2	2	2	0.96822	1.07203	1.07656	1.19199	1.0772	0.142245
G3V8I4	Syntaxin 4A (Placental), isoform CRA_a OS=Rattus norvegicus GN=Stx4 PE=1 SV=1	1	1	0.980707	1.01501	1.09189	1.13007	1.05442	0.163668
Q5FVN0	Lysophospholipid acyltransferase 5 OS=Rattus norvegicus GN=Lpcat3 PE=2 SV=1	1	1	1.03737	0.984145	1.00992	0.958104	0.997386	0.882946
Q5HZA9	Transmembrane protein 126A OS=Rattus norvegicus GN=Tmem126a PE=2 SV=1	1	1	1.01213	1.11577	1.01549	1.11947	1.06571	0.0709257
A0A096MJ11	Gasdermin D OS=Rattus norvegicus GN=Gsdmd PE=1 SV=1	1	1	0.900098	0.971596	0.926411	1	0.949526	0.0649963
G3V6Y7	Caspase activity and apoptosis inhibitor 1 OS=Rattus norvegicus GN=Caap1 PE=1 SV=2	2	2	1.06113	1.05882	1.11245	1.11004	1.08561	0.00117397
F1M1E4	Paroxysmal nonkinesigenic dyskinesia OS=Rattus norvegicus GN=Pnkd PE=1 SV=1	1	1	1.12607	1.1787	0.940695	0.984663	1.05753	0.34803
D4A3Q3	Nuclear receptor coactivator 1 OS=Rattus norvegicus GN=Ncoa1 PE=1 SV=2	1	1	0.902846	1.02061	0.933063	1.05477	0.977821	0.558301
I7EFB0	Myelin basic protein transcript variant N (Fragment) OS=Rattus norvegicus GN=Mbp PE=2 SV=1	2	2	0.417612	0.50522	0.894942	1.08268	0.725115	0.132572
Q5XHY0	RNA helicase OS=Rattus norvegicus GN=Ddx18 PE=1 SV=1	1	1	0.990323	1.03548	0.910979	0.952522	0.972327	0.33769
Q6AY65	Arfaptin-2 OS=Rattus norvegicus GN=Arfip2 PE=2 SV=1	1	1	1.07334	1.4773	1.00765	1.38689	1.23629	0.0863646
O88763	Phosphatidylinositol 3-kinase catalytic subunit type 3 OS=Rattus norvegicus GN=Pik3c3 PE=1 SV=1	4	4	0.818828	0.993783	0.818101	0.992902	0.905903	0.111617
Q5M7T4	Protein YIPF4 OS=Rattus norvegicus GN=Yipf4 PE=2 SV=1	1	1	0.951546	1.08763	0.958463	1.09553	1.02329	0.576762
A0A0H2UHT3	39S ribosomal protein L22, mitochondrial OS=Rattus norvegicus GN=Mrpl22 PE=1 SV=1	1	1	1.03475	0.961883	0.939919	0.873727	0.952571	0.202899
A0A0G2JVZ6	Integrin subunit alpha V OS=Rattus norvegicus GN=Itgav PE=1 SV=1	1	1	0.905181	0.876833	1.02661	0.994457	0.950769	0.215921
P70705	Copper-transporting ATPase 1 OS=Rattus norvegicus GN=Atp7a PE=1 SV=1	3	3	0.940283	1.12449	0.947959	1.13367	1.0366	0.519034
Q5XIM0	BCS1 homolog, ubiquinol-cytochrome c reductase complex chaperone OS=Rattus norvegicus GN=Bcs1l PE=1 SV=1	4	4	0.884762	0.938095	0.89499	0.94894	0.916697	0.00186766
A0A0G2JW12	Complement component 4A (Rodgers blood group) OS=Rattus norvegicus GN=LOC103689965 PE=1 SV=1	4	4	1.06016	1.31101	1.01965	1.26092	1.16293	0.0649469
D3ZYI0	Grancalcin OS=Rattus norvegicus GN=Gca PE=1 SV=2	2	2	1.19437	1.08056	0.995736	0.900853	1.04288	0.517795
Q32Q88	F-box protein 22 OS=Rattus norvegicus GN=Fbxo22 PE=1 SV=1	1	1	0.923913	0.916008	1.02298	1.01422	0.96928	0.323684
A0A0G2JSQ9	Proline-, glutamic acid- and leucine-rich protein 1 OS=Rattus norvegicus GN=Pelp1 PE=1 SV=1	1	1	1.1566	1.17756	1.01625	1.03467	1.09627	0.0584556
A0A0G2K556	BRCA1-A complex subunit RAP80 OS=Rattus norvegicus GN=Uimc1 PE=1 SV=1	1	1	1.08555	0.995376	1.03528	0.949283	1.01637	0.592704
D3ZDX5	Plexin B1 OS=Rattus norvegicus GN=Plxnb1 PE=1 SV=1	1	1	0.902017	1.01057	0.873488	0.978605	0.941169	0.11614
D3ZGD0	Gem (nuclear organelle)-associated protein 5 OS=Rattus norvegicus GN=Gemin5 PE=1 SV=2	1	1	1.02508	1.07415	0.974093	1.02073	1.02351	0.29392
A0A0G2JTK4	Protein phosphatase 6, regulatory subunit 1 OS=Rattus norvegicus GN=Ppp6r1 PE=1 SV=1	1	1	0.94	1.021	0.823839	0.894829	0.919917	0.100661
F1M8H2	Tryptophanyl tRNA synthetase 2 (mitochondrial) OS=Rattus norvegicus GN=Wars2 PE=1 SV=2	2	2	1.0064	1.10874	0.957404	1.05477	1.03183	0.364417
B5DFF4	VPS37C, ESCRT-I subunit OS=Rattus norvegicus GN=Vps37c PE=1 SV=1	3	3	1.01286	1.0911	0.998943	1.07611	1.04475	0.0974955
D4A648	Serine/threonine kinase 4 OS=Rattus norvegicus GN=Stk4 PE=1 SV=1	3	2	1.1	1.12326	1.04878	1.07095	1.08575	0.00191115
F1LZ05	Poly [ADP-ribose] polymerase OS=Rattus norvegicus GN=Parp14 PE=1 SV=2	5	5	0.941352	1.02684	0.967314	1.05516	0.997666	0.931953
D3ZQH9	RAS p21 protein activator 4 OS=Rattus norvegicus GN=Rasa4 PE=1 SV=1	2	2	0.899335	0.962013	0.915861	0.979691	0.939225	0.0183008
Q6QD51	Coiled-coil domain-containing protein 80 OS=Rattus norvegicus GN=Ccdc80 PE=1 SV=1	2	2	0.833627	1.03433	0.844029	1.04724	0.939806	0.342401
F1LM60	ArfGAP with RhoGAP domain, ankyrin repeat and PH domain 1 OS=Rattus norvegicus GN=Arap1 PE=1 SV=1	2	2	0.933137	1.04818	0.987513	1.10926	1.01952	0.62611
B1WBW4	Armadillo repeat-containing protein 10 OS=Rattus norvegicus GN=Armc10 PE=1 SV=1	1	1	0.845058	0.890472	0.934975	0.985222	0.913932	0.0285608
P51607	N-acylglucosamine 2-epimerase OS=Rattus norvegicus GN=Renbp PE=2 SV=2	2	2	1.01494	1.27108	1.04851	1.31312	1.16191	0.0770474
D3ZQ02	WD repeat domain 37 OS=Rattus norvegicus GN=Wdr37 PE=1 SV=3	1	1	0.872477	0.918349	0.878116	0.924284	0.898307	0.000271132
A0A0G2K7W2	Aldehyde dehydrogenase OS=Rattus norvegicus GN=Aldh3b1 PE=3 SV=1	2	1	0.980473	0.868448	0.968528	0.857868	0.918829	0.0457463
A0A0F7RQL3	Macrophage migration inhibitory factor OS=Rattus norvegicus GN=Mif PE=4 SV=1	1	1	0.784539	0.862664	0.817481	0.898886	0.840893	0.000721787
Q63714	Rat GCP360 OS=Rattus norvegicus GN=Golgb1 PE=2 SV=1	46	1	0.905213	1.15924	1.6843	2.15697	1.47643	0.138421
D3ZD80	General transcription factor IIIC subunit 4 OS=Rattus norvegicus GN=Gtf3c4 PE=1 SV=1	2	2	1.11021	1.14849	1.09497	1.13272	1.1216	5.00684e-05
Q6AXW2	RCG25684, isoform CRA_a OS=Rattus norvegicus GN=Tmod3 PE=1 SV=1	3	2	0.825	0.981897	0.912297	1.0858	0.951247	0.410716
A1A5S2	CXXC finger 1 (PHD domain) OS=Rattus norvegicus GN=Cxxc1 PE=1 SV=1	3	3	0.854982	0.825623	0.901501	0.870544	0.863163	0.000131264
Q68G38	Torsin-1A OS=Rattus norvegicus GN=Tor1a PE=1 SV=1	1	1	0.961039	1.04396	0.924111	1.00384	0.983237	0.542666
O35867	Neurabin-1 OS=Rattus norvegicus GN=Ppp1r9a PE=1 SV=1	4	4	0.865887	0.873087	0.880952	0.888278	0.877051	2.46535e-07
G3V843	Prothrombin OS=Rattus norvegicus GN=F2 PE=1 SV=1	3	3	1.13263	0.942488	1.14881	0.955952	1.04497	0.448316
A0A0G2KB52	Microtubule-associated protein 7 OS=Rattus norvegicus GN=Map7 PE=1 SV=1	3	3	0.918329	0.907882	0.89537	0.885185	0.901692	9.83304e-06
Q499V0	COMM domain containing 7, isoform CRA_d OS=Rattus norvegicus GN=Commd7 PE=1 SV=1	2	2	0.979757	1.16093	0.888073	1.05229	1.02026	0.737374
D4AEK9	Coiled-coil domain-containing 6 OS=Rattus norvegicus GN=Ccdc6 PE=1 SV=3	2	2	0.914232	0.994345	0.965174	1.04975	0.980876	0.524412
B1H230	Dual-specificity mitogen-activated protein kinase kinase 3-like OS=Rattus norvegicus GN=Map2k3 PE=1 SV=1	2	2	1.0418	1.10289	1.11596	1.1814	1.11051	0.00835799
B4F7E7	Membrane palmitoylated protein 5 OS=Rattus norvegicus GN=Mpp5 PE=1 SV=1	1	1	0.983871	1.31552	0.980905	1.31156	1.14796	0.172654
A0A0G2JVA7	Eukaryotic translation initiation factor 1A OS=Rattus norvegicus GN=Eif1a PE=1 SV=1	1	1	1.04711	1.09636	1.03383	1.08245	1.06494	0.00442889
F1M661	BMP-binding endothelial regulator OS=Rattus norvegicus GN=Bmper PE=4 SV=2	1	1	0.931429	1.36	0.898072	1.31129	1.1252	0.34473
Q6NX65	Programmed cell death protein 10 OS=Rattus norvegicus GN=Pdcd10 PE=2 SV=1	3	3	1.04251	0.939426	1.05597	0.951561	0.997367	0.933317
A0A0G2K5G9	Protein Red OS=Rattus norvegicus GN=Ik PE=1 SV=1	2	2	0.888587	0.952899	0.916822	0.983178	0.935371	0.0203985
A0A0G2K712	TBC1 domain family, member 5 OS=Rattus norvegicus GN=Tbc1d5 PE=1 SV=1	1	1	0.956226	0.931907	1.05585	1.029	0.993247	0.825616
Q6Q0N0	Calsyntenin-1 OS=Rattus norvegicus GN=Clstn1 PE=1 SV=1	1	1	1.12471	1.31579	1.03801	1.21436	1.17322	0.0271396
F1LSH3	Origin recognition complex subunit 3 OS=Rattus norvegicus GN=Orc3 PE=4 SV=2	2	2	1.04681	1.02979	0.954413	0.938894	0.992476	0.788864
D4A5S9	Pre-mRNA-processing factor 39 OS=Rattus norvegicus GN=Prpf39 PE=1 SV=1	1	1	0.905331	1.07996	0.910351	1.08595	0.995399	0.930482
Q711G3	Isoamyl acetate-hydrolyzing esterase 1 homolog OS=Rattus norvegicus GN=Iah1 PE=2 SV=2	4	4	0.871795	0.874447	1.07407	1.07734	0.974415	0.677094
Q4QR75	Exosome complex component RRP45 OS=Rattus norvegicus GN=Exosc9 PE=1 SV=1	1	1	1.06136	1.02691	1.05342	1.01923	1.04023	0.00745456
P62628	Dynein light chain roadblock-type 1 OS=Rattus norvegicus GN=Dynlrb1 PE=1 SV=3	2	2	0.988967	1.01605	0.95082	0.976856	0.983173	0.26041
D4A6X3	KN motif and ankyrin repeat domains 4 OS=Rattus norvegicus GN=Kank4 PE=1 SV=1	3	3	0.912118	0.979648	0.879572	0.944692	0.929008	0.0163231
M0RDI5	Mitochondrial calcium uniporter OS=Rattus norvegicus GN=Mcu PE=1 SV=1	6	6	1.0411	1.09905	0.960155	1.01361	1.02848	0.36264
A0A0G2JUQ8	Ubiquitin carboxyl-terminal hydrolase 48-like OS=Rattus norvegicus GN=Usp48 PE=1 SV=1	2	2	1.15519	1.12135	0.975369	0.946798	1.04968	0.375799
D3ZY44	Mitochondrial ribosomal protein S2 OS=Rattus norvegicus GN=Mrps2 PE=1 SV=1	1	1	0.972522	1.04318	0.865502	0.928384	0.952397	0.250038
A0A0G2K675	Alpha-ketoglutarate-dependent dioxygenase FTO OS=Rattus norvegicus GN=Fto PE=1 SV=1	6	6	0.972576	1.12929	0.825436	0.958437	0.971434	0.662132
D3ZWF5	Transcription and mRNA export factor ENY2 OS=Rattus norvegicus GN=Eny2 PE=1 SV=1	1	1	0.951243	1.00287	1.02156	1.077	1.01317	0.630053
Q63186	Translation initiation factor eIF-2B subunit delta OS=Rattus norvegicus GN=Eif2b4 PE=2 SV=1	3	3	0.987103	0.877976	1.00607	0.894843	0.941497	0.119362
Q5XI86	Peptidyl-tRNA hydrolase 2 OS=Rattus norvegicus GN=Ptrh2 PE=1 SV=1	1	1	0.998	0.954	1.17828	1.12633	1.06415	0.269661
A0A023IKJ3	Transporter 2 ATP-binding cassette sub-family B OS=Rattus norvegicus GN=Tap2 PE=2 SV=1	1	1	0.951382	0.944709	1.03099	1.02376	0.987711	0.612164
D3ZXK4	Abhydrolase domain-containing 11 OS=Rattus norvegicus GN=Abhd11 PE=1 SV=1	1	1	0.822754	0.982688	0.879295	1.05022	0.933739	0.241777
G3V997	Neuronal migration protein doublecortin OS=Rattus norvegicus GN=Dcx PE=1 SV=1	2	2	0.904891	0.961051	0.926716	0.98423	0.944222	0.0195484
D3ZAS9	DDRGK domain-containing 1 OS=Rattus norvegicus GN=Ddrgk1 PE=1 SV=1	2	2	1.03093	1.13711	1.00705	1.11078	1.07147	0.0616139
Q4KM65	Cleavage and polyadenylation specificity factor subunit 5 OS=Rattus norvegicus GN=Nudt21 PE=2 SV=1	1	1	0.959732	1.01055	1.03516	1.08997	1.02385	0.412015
A0A0G2K437	Autocrine motility factor receptor OS=Rattus norvegicus GN=Amfr PE=1 SV=1	1	1	1	0.933067	0.979452	0.913894	0.956603	0.0726996
B2GUZ6	Reticulon 4-interacting protein 1 OS=Rattus norvegicus GN=Rtn4ip1 PE=1 SV=1	2	2	1.02977	1.10472	1.25218	1.34332	1.1825	0.0418294
Q5I0H3	Small ubiquitin-related modifier 1 OS=Rattus norvegicus GN=Sumo1 PE=1 SV=1	1	1	0.901345	1.06188	1.01618	1.19717	1.04414	0.497667
D3ZN27	DnaJ heat shock protein family (Hsp40) member C13 OS=Rattus norvegicus GN=Dnajc13 PE=1 SV=2	4	4	1.05456	1.09024	0.979532	1.01267	1.03425	0.206136
Q4V797	Interferon-gamma-inducible GTPase Ifgga1 protein OS=Rattus norvegicus GN=RGD1309362 PE=1 SV=1	1	1	0.761544	0.938683	0.802873	0.989625	0.873181	0.0578678
Q99PK0	Pre-mRNA-splicing factor SYF1 OS=Rattus norvegicus GN=Xab2 PE=2 SV=1	2	2	1.03597	1.25591	0.949153	1.15066	1.09792	0.193618
Q5XIC2	Evolutionarily conserved signaling intermediate in Toll pathway, mitochondrial OS=Rattus norvegicus GN=Ecsit PE=1 SV=1	1	1	0.901698	0.854334	0.998022	0.945598	0.924913	0.0499501
D3ZZR9	Peptidylprolyl isomerase OS=Rattus norvegicus GN=Fkbp2 PE=1 SV=1	2	2	0.877604	0.823785	1.10492	1.03716	0.960866	0.57496
Q4QQW3	Hydroxyacid-oxoacid transhydrogenase, mitochondrial OS=Rattus norvegicus GN=Adhfe1 PE=1 SV=1	1	1	1.07325	0.933121	1.01303	0.880762	0.975039	0.578908
D3ZZ94	Poly [ADP-ribose] polymerase OS=Rattus norvegicus GN=Parp10 PE=1 SV=1	1	1	1.07211	1.10074	0.924977	0.94968	1.01188	0.795016
Q6P7Q1	BRISC and BRCA1-A complex member 2 OS=Rattus norvegicus GN=Babam2 PE=1 SV=1	2	2	0.843203	0.861551	0.868557	0.887457	0.865192	6.12896e-06
P04897	Guanine nucleotide-binding protein G(i) subunit alpha-2 OS=Rattus norvegicus GN=Gnai2 PE=1 SV=3	7	3	0.983495	0.957282	0.935365	0.910434	0.946644	0.0140298
D3ZLE2	Transmembrane and coiled-coil domain family 3 OS=Rattus norvegicus GN=Tmcc3 PE=1 SV=1	1	1	0.970335	1.3311	1.11306	1.52689	1.23535	0.102543
Q5RKH5	Phosphorylase b kinase regulatory subunit OS=Rattus norvegicus GN=Phkb PE=1 SV=1	1	1	0.847953	0.979114	0.879549	1.0156	0.930554	0.131673
Q68FY1	Nucleoporin NUP53 OS=Rattus norvegicus GN=Nup35 PE=1 SV=1	2	2	1.03779	1.11542	1.12764	1.21199	1.12321	0.0135436
B0BNM3	Sorting nexin OS=Rattus norvegicus GN=Snx9 PE=2 SV=1	1	1	0.956685	1.09793	0.912029	1.04668	1.00333	0.939621
E9PT51	DNA polymerase delta-interacting protein 2 OS=Rattus norvegicus GN=Poldip2 PE=1 SV=3	2	2	1.03561	1.12513	0.680481	0.739305	0.89513	0.373796
P21588	5'-nucleotidase OS=Rattus norvegicus GN=Nt5e PE=1 SV=1	3	3	1.03971	0.98167	0.936697	0.884404	0.960621	0.278
Q5FVC5	Nectin cell adhesion molecule 2 OS=Rattus norvegicus GN=Nectin2 PE=1 SV=1	2	2	1.23614	1.14337	1.08114	1	1.11516	0.0603547
A0A0A0MY43	Activating signal cointegrator 1 complex subunit 3 OS=Rattus norvegicus GN=Ascc3 PE=1 SV=1	1	1	0.900877	1.1386	0.922731	1.16622	1.03211	0.661858
D3Z9K9	Glycerophosphodiester phosphodiesterase domain containing 2 (Predicted), isoform CRA_a OS=Rattus norvegicus GN=Gdpd2 PE=4 SV=1	1	1	0.866667	0.963713	0.899299	1	0.93242	0.0667609
A0A0G2K847	ArfGAP with GTPase domain, ankyrin repeat and PH domain 1 OS=Rattus norvegicus GN=Agap1 PE=4 SV=1	1	1	0.959851	0.944911	0.962547	0.947566	0.953719	4.26647e-05
O70280	WAP four-disulfide core domain protein 1 OS=Rattus norvegicus GN=Wfdc1 PE=1 SV=1	1	1	0.861693	0.911148	0.902546	0.954346	0.907433	0.00278676
A0A0G2K781	PPFIA-binding protein 1 OS=Rattus norvegicus GN=Ppfibp1 PE=1 SV=1	2	2	1.12953	1.07684	1.0168	0.969368	1.04813	0.217305
M0R907	RCG60635, isoform CRA_b OS=Rattus norvegicus GN=Snrpd3 PE=1 SV=1	1	1	0.854063	0.930348	1.03206	1.12425	0.985181	0.809984
D3ZIT4	Anaphase promoting complex subunit 7 (Predicted) OS=Rattus norvegicus GN=Anapc7 PE=1 SV=1	1	1	0.854063	0.730514	0.953704	0.815741	0.838505	0.0129814
Q64361	Latexin OS=Rattus norvegicus GN=Lxn PE=1 SV=1	2	2	1.03722	0.902414	1.18099	1.02749	1.03703	0.539728
Q4AE70	Histone-arginine methyltransferase CARM1 OS=Rattus norvegicus GN=Carm1 PE=1 SV=1	1	1	0.990394	1.08165	1.12187	1.22524	1.10479	0.0747784
F1LTD0	G protein-coupled receptor 89B OS=Rattus norvegicus GN=Gpr89b PE=1 SV=2	3	3	1.04883	1.15158	1.01576	1.11527	1.08286	0.0363164
P97603	Neogenin (Fragment) OS=Rattus norvegicus GN=Neo1 PE=1 SV=1	2	2	1.01367	1.0791	0.779279	0.82958	0.925408	0.33921
Q5XIU4	B-cell receptor-associated protein 29 OS=Rattus norvegicus GN=Bcap29 PE=1 SV=1	1	1	1.23286	1.013	1.13617	0.933551	1.07889	0.277783
G3V907	Peroxisomal biogenesis factor 19-like OS=Rattus norvegicus GN=LOC100911356 PE=1 SV=1	2	2	0.95696	0.858059	1.10582	0.991534	0.978093	0.683174
D3ZXB9	Sorting nexin 19 OS=Rattus norvegicus GN=Snx19 PE=1 SV=2	1	1	1.13464	1.11075	1.02956	1.00788	1.07071	0.0610159
Q5RKG9	Eukaryotic translation initiation factor 4B OS=Rattus norvegicus GN=Eif4b PE=1 SV=1	6	6	0.964912	1.00185	1.02854	1.06791	1.0158	0.494298
D3ZZP8	Cullin 9 OS=Rattus norvegicus GN=Cul9 PE=1 SV=2	2	2	0.985849	1.03962	0.981221	1.03474	1.01036	0.530017
Q66HD3	Nuclear autoantigenic sperm protein OS=Rattus norvegicus GN=Nasp PE=1 SV=1	4	4	1.10923	1	1.02148	0.920898	1.0129	0.750254
G3V6U9	Histone-lysine N-methyltransferase OS=Rattus norvegicus GN=Setd3 PE=1 SV=1	3	3	1.03245	1.0059	0.999049	0.973359	1.00269	0.832102
Q4KLP0	Probable 2-oxoglutarate dehydrogenase E1 component DHKTD1, mitochondrial OS=Rattus norvegicus GN=Dhtkd1 PE=2 SV=1	3	3	0.906736	0.947323	0.953678	0.996367	0.951026	0.0370411
Q3KRE3	Guanine nucleotide-binding protein subunit gamma OS=Rattus norvegicus GN=Gng10 PE=1 SV=1	1	1	0.92193	0.892105	0.905254	0.875969	0.898815	4.70889e-05
Q1RP74	RCG53953, isoform CRA_a OS=Rattus norvegicus GN=LOC103690005 PE=1 SV=1	3	3	1.01448	1.07239	0.887669	0.938345	0.978222	0.612652
B2RZA4	RCG31866, isoform CRA_a OS=Rattus norvegicus GN=Ap1m2 PE=2 SV=1	2	1	0.987793	1.07981	0.975881	1.06679	1.02757	0.340754
Q5U211	Sorting nexin-3 OS=Rattus norvegicus GN=Snx3 PE=1 SV=1	1	1	0.972299	1.05725	1.01739	1.10628	1.0383	0.228089
P21708-2	Isoform 2 of Mitogen-activated protein kinase 3 OS=Rattus norvegicus GN=Mapk3	6	3	1.0603	0.859296	1.1117	0.900948	0.983061	0.790389
Q4VBH2	tRNA nucleotidyl transferase 1 OS=Rattus norvegicus GN=Trnt1 PE=1 SV=1	3	3	1.00668	0.926527	0.993409	0.914313	0.960232	0.138432
Q6AY02	RNA-binding motif protein 17 OS=Rattus norvegicus GN=Rbm17 PE=1 SV=1	1	1	0.8393	0.82498	0.97235	0.95576	0.898098	0.0376402
D3ZAH3	Neural precursor cell-expressed, developmentally down-regulated 1 OS=Rattus norvegicus GN=Nedd1 PE=1 SV=1	1	1	0.958296	0.904805	0.938721	0.886323	0.922036	0.00299993
B5DFJ2	Fam3a protein OS=Rattus norvegicus GN=Fam3a PE=1 SV=1	1	1	1.02621	1.06408	0.924759	0.95888	0.993483	0.843373
Q6IMA8	ADP-ribosylation factor-like 10 OS=Rattus norvegicus GN=Arl10 PE=2 SV=1	1	1	0.961818	0.916364	1.06012	1.01002	0.987081	0.690955
Q9Z1Z1	Eukaryotic translation initiation factor 2-alpha kinase 3 OS=Rattus norvegicus GN=Eif2ak3 PE=1 SV=1	1	1	1.04955	1.04361	1.13749	1.13104	1.09042	0.0118781
Q5XI28	Ribonucleoprotein PTB-binding 1 OS=Rattus norvegicus GN=Raver1 PE=1 SV=1	2	2	1.19661	1.32994	1.07404	1.19371	1.19858	0.00898353
B0BNL2	Peptidyl-prolyl cis-trans isomerase OS=Rattus norvegicus GN=Pin1 PE=1 SV=1	1	1	0.936396	0.808304	1.08941	0.940391	0.943626	0.364485
B0BNB5	LOC683983 protein OS=Rattus norvegicus GN=Nup43 PE=1 SV=1	2	2	0.798794	0.894499	0.94055	1.05324	0.92177	0.189232
F1LYZ8	Protein phosphatase 1, regulatory subunit 21 OS=Rattus norvegicus GN=Ppp1r21 PE=1 SV=3	4	4	0.942222	0.943111	0.916955	0.91782	0.930027	7.38091e-05
A0A0G2K785	Glycerol kinase OS=Rattus norvegicus GN=Gk PE=1 SV=1	1	1	0.932397	0.981563	0.859223	0.904531	0.919428	0.0199383
Q5PQK1	Septin-10 OS=Rattus norvegicus GN=Sept10 PE=1 SV=1	3	2	1.03201	1.03686	1.09353	1.09866	1.06526	0.0106495
Q5I0E7	Transmembrane emp24 domain-containing protein 9 OS=Rattus norvegicus GN=Tmed9 PE=1 SV=1	2	2	1.07042	1.00905	1.05242	0.992087	1.031	0.14084
A0A0G2K896	Similar to RIKEN cDNA 1300017J02 OS=Rattus norvegicus GN=RGD1310507 PE=1 SV=1	2	1	0.839089	1.0314	0.744948	0.915679	0.882778	0.101256
O08769	Cyclin dependent kinase inhibitor OS=Rattus norvegicus GN=Cdkn1b PE=1 SV=1	3	3	0.989852	0.991697	1.01803	1.01992	1.00488	0.571994
O19445	MHC class Ib antigen OS=Rattus norvegicus GN=RT1-Cl PE=3 SV=2	2	1	1.05083	0.934506	1.05083	0.934506	0.992669	0.834412
Q5BK33	p55 protein OS=Rattus norvegicus GN=LOC652956 PE=2 SV=1	5	5	0.92545	0.965724	1.10542	1.15353	1.03753	0.517558
F1LUN5	Collagen type IV alpha 5 chain OS=Rattus norvegicus GN=Col4a5 PE=3 SV=3	1	1	0.989927	1.07326	1.13312	1.22851	1.10621	0.0789423
A0A0G2JSR4	Signal transducer and activator of transcription OS=Rattus norvegicus GN=Stat5b PE=1 SV=1	3	3	0.901585	1.08007	0.894868	1.07202	0.987135	0.810621
D4A8F2	Ras suppressor protein 1 OS=Rattus norvegicus GN=Rsu1 PE=1 SV=3	2	2	1.04845	0.958333	1.0444	0.954633	1.00145	0.957187
Q01460	Di-N-acetylchitobiase OS=Rattus norvegicus GN=Ctbs PE=1 SV=1	2	2	1.08417	1.25752	0.987226	1.14507	1.1185	0.0811973
D4A944	Small nuclear ribonucleoprotein U5 subunit 40 OS=Rattus norvegicus GN=Snrnp40 PE=1 SV=3	1	1	0.982759	1.13793	1.0334	1.19656	1.08766	0.12128
A0A0G2K1U9	Immunity-related GTPase Q OS=Rattus norvegicus GN=Irgq PE=1 SV=1	4	4	1.02751	1.0408	0.920136	0.932031	0.980119	0.550113
Q00238	Intercellular adhesion molecule 1 OS=Rattus norvegicus GN=Icam1 PE=2 SV=1	1	1	0.955185	1.17311	0.9173	1.12658	1.04304	0.519099
F1M7L9	Plakophilin 2 OS=Rattus norvegicus GN=Pkp2 PE=1 SV=3	2	2	1.02256	1.01692	1.01777	1.01216	1.01735	0.000183547
A0A140TAF5	Chloride channel CLIC-like 1, isoform CRA_c OS=Rattus norvegicus GN=Clcc1 PE=1 SV=1	2	2	1.10548	1.0497	1.08028	1.02577	1.0653	0.00954189
A0A096MKH2	Similar to RIKEN cDNA 1110059P08 OS=Rattus norvegicus GN=Vta1 PE=1 SV=1	1	1	0.898599	0.960429	0.962048	1.02824	0.96233	0.204598
D3ZLH8	Rtf1, Paf1/RNA polymerase II complex component, homolog (S. cerevisiae) OS=Rattus norvegicus GN=Rtf1 PE=1 SV=1	3	3	0.905316	1.17193	0.897858	1.16227	1.03434	0.669986
Q63357	Unconventional myosin-Id OS=Rattus norvegicus GN=Myo1d PE=1 SV=3	5	5	0.943152	1.15935	0.9375	1.1524	1.0481	0.469047
D3ZH30	mRNA-capping enzyme OS=Rattus norvegicus GN=Rngtt PE=1 SV=1	3	3	0.910373	0.980913	0.94244	1.01546	0.962298	0.149986
D4AED6	RCG21708, isoform CRA_a OS=Rattus norvegicus GN=Mettl27 PE=1 SV=1	2	2	0.985624	0.971249	0.832322	0.820182	0.902344	0.0687219
A0A0G2K3S6	RNA binding motif protein 10, isoform CRA_a OS=Rattus norvegicus GN=Rbm10 PE=1 SV=1	5	4	0.804985	1.22947	0.887631	1.3557	1.06945	0.618873
Q68FX9	NAD-dependent protein deacylase sirtuin-5, mitochondrial OS=Rattus norvegicus GN=Sirt5 PE=2 SV=1	2	2	0.877893	0.965682	0.862069	0.948276	0.91348	0.0147889
D4A3T3	Chromobox 1 OS=Rattus norvegicus GN=Cbx1 PE=1 SV=1	2	1	0.98574	0.959893	0.934911	0.910397	0.947735	0.0180128
Q6TUH0	2',5'-phosphodiesterase 12 OS=Rattus norvegicus GN=Pde12 PE=1 SV=1	2	2	1.0735	1.17795	0.910582	0.99918	1.0403	0.503819
F1LQT0	DnaJ homolog subfamily C member 25 OS=Rattus norvegicus GN=Dnajc25 PE=1 SV=1	1	1	0.984071	1.08142	1.01553	1.11598	1.04925	0.152943
Q4FZU4	ADAMTS-like protein 4 OS=Rattus norvegicus GN=Adamtsl4 PE=2 SV=1	1	1	0.947234	0.897872	0.823834	0.780903	0.862461	0.0100916
D3ZAQ0	FUN14 domain-containing 2 OS=Rattus norvegicus GN=Fundc2 PE=1 SV=1	2	2	1.16649	1.25759	0.966175	1.04163	1.10797	0.146481
F1LYQ0	Protein S100 OS=Rattus norvegicus GN=RGD1563581 PE=3 SV=3	1	1	0.821534	0.932891	0.913864	1.03774	0.926506	0.148488
D3ZN19	Ring finger protein 121 OS=Rattus norvegicus GN=Rnf121 PE=1 SV=1	1	1	1.03336	0.921223	1.0286	0.916974	0.97504	0.469317
F1M6V6	Sparc/osteonectin, cwcv and kazal-like domains proteoglycan 1 OS=Rattus norvegicus GN=Spock1 PE=4 SV=2	2	2	1.07308	1.06442	1.14579	1.13655	1.10496	0.00249509
F1LVX1	DnaJ heat shock protein family (Hsp40) member C1 OS=Rattus norvegicus GN=Dnajc1 PE=1 SV=3	2	2	1.19486	1.17024	1.03429	1.01297	1.10309	0.0678254
B2RYM8	Family with sequence similarity 210, member B OS=Rattus norvegicus GN=Fam210b PE=1 SV=1	1	1	0.911765	0.889706	1.01732	0.992707	0.952874	0.17747
Q63055	ADP-ribosylation factor-related protein 1 OS=Rattus norvegicus GN=Arfrp1 PE=2 SV=1	2	2	1.05283	1.00566	0.999105	0.954342	1.00298	0.887119
Q66H90	Bardet-Biedl syndrome 7 protein homolog OS=Rattus norvegicus GN=Bbs7 PE=2 SV=1	2	2	1.09091	1.11828	0.763338	0.78249	0.938754	0.54701
D3ZZN4	Uncharacterized protein OS=Rattus norvegicus PE=3 SV=1	1	1	1.00179	1.00538	1.03327	1.03697	1.01935	0.0791825
P08644	GTPase KRas OS=Rattus norvegicus GN=Kras PE=1 SV=3	3	3	1.03036	1.03864	1.12563	1.13467	1.08232	0.0249813
D4AAG8	Structural maintenance of chromosomes flexible hinge domain-containing 1 OS=Rattus norvegicus GN=Smchd1 PE=4 SV=2	4	4	0.921811	0.914403	1.06768	1.0591	0.99075	0.833012
B1H248	Vacuolar protein-sorting-associated protein 36 OS=Rattus norvegicus GN=Vps36 PE=1 SV=1	2	2	1.03036	0.910764	0.949958	0.839695	0.932694	0.1414
F1LMV9	Coronin OS=Rattus norvegicus GN=Coro2b PE=3 SV=3	2	2	0.962264	0.999142	0.899038	0.933494	0.948485	0.0516736
Q499U2	Engulfment and cell motility protein 3 OS=Rattus norvegicus GN=Elmo3 PE=2 SV=1	4	4	0.887135	0.974743	0.939799	1.03261	0.958572	0.223864
P62966	Cellular retinoic acid-binding protein 1 OS=Rattus norvegicus GN=Crabp1 PE=1 SV=3	1	1	0.907183	1.1138	0.880188	1.08066	0.995458	0.941533
Q5XJW2	Growth arrest and DNA damage-inducible proteins-interacting protein 1 OS=Rattus norvegicus GN=Gadd45gip1 PE=2 SV=2	2	2	0.857361	0.965675	0.817455	0.920727	0.890304	0.0157487
A9UMV9	NADH:ubiquinone oxidoreductase subunit A7 OS=Rattus norvegicus GN=Ndufa7 PE=1 SV=1	1	1	0.926869	1.02301	0.949495	1.04798	0.986838	0.665039
F1LQE6	DNA-binding protein SMUBP-2 OS=Rattus norvegicus GN=Ighmbp2 PE=4 SV=2	1	1	0.986026	1.0393	1.05712	1.11423	1.04917	0.112139
Q4V8G6	Methyltransferase-like 3 OS=Rattus norvegicus GN=Mettl3 PE=1 SV=1	2	2	0.916396	0.909903	0.969099	0.962232	0.939407	0.00741008
Q923V4	F-box only protein 6 OS=Rattus norvegicus GN=Fbxo6 PE=1 SV=1	5	5	0.834071	0.924779	0.907705	1.00642	0.918244	0.0601584
G3V7Z8	Poly(A) binding protein, nuclear 1, isoform CRA_a OS=Rattus norvegicus GN=Pabpn1 PE=1 SV=1	2	2	0.975904	0.998279	0.986087	1.0087	0.992241	0.31899
D4A2C6	LSM4 homolog, U6 small nuclear RNA and mRNA degradation-associated OS=Rattus norvegicus GN=Lsm4 PE=1 SV=1	2	2	0.947368	0.989975	0.969231	1.01282	0.979849	0.200548
Q5XIB4	Ufm1-specific protease 2 OS=Rattus norvegicus GN=Ufsp2 PE=2 SV=1	4	4	0.994741	0.895706	1.07992	0.972407	0.985695	0.718818
A0A0G2K0J4	Nipped-B protein OS=Rattus norvegicus GN=Nipbl PE=1 SV=1	3	3	0.988676	1.07404	0.988676	1.07404	1.03136	0.250273
E9PTK4	Threonine synthase-like 1 OS=Rattus norvegicus GN=Thnsl1 PE=1 SV=1	2	2	0.936573	0.907743	1.04312	1.01101	0.974611	0.451531
B2RZ96	LOC689226 protein OS=Rattus norvegicus GN=Ube2r2 PE=1 SV=1	1	1	0.964497	1.09129	0.995637	1.12653	1.04449	0.290802
P58405-2	Isoform 2 of Striatin-3 OS=Rattus norvegicus GN=Strn3	2	1	1.06337	0.99068	0.936013	0.872026	0.965523	0.428796
D3ZF21	GPRIN family member 3 OS=Rattus norvegicus GN=Gprin3 PE=1 SV=2	2	2	1.01783	1.01961	0.959664	0.961345	0.98961	0.559292
Q641Z2	Tyrosine-protein phosphatase non-receptor type 9 OS=Rattus norvegicus GN=Ptpn9 PE=2 SV=1	2	2	0.930725	1.01222	0.893584	0.971831	0.952091	0.110842
Q6IRK3	Syndecan OS=Rattus norvegicus GN=Sdc2 PE=1 SV=1	1	1	1.17575	1.11614	1.04858	0.995417	1.08397	0.0766132
B5DFG9	Pik3ap1 protein OS=Rattus norvegicus GN=Pik3ap1 PE=2 SV=1	2	2	1.18919	1.11954	0.994783	0.936522	1.06001	0.337206
P27867	Sorbitol dehydrogenase OS=Rattus norvegicus GN=Sord PE=1 SV=4	4	4	0.977797	0.949616	0.963805	0.936027	0.956811	0.00301258
F1LRZ9	RUN domain-containing 3A OS=Rattus norvegicus GN=Rundc3a PE=1 SV=1	2	2	0.916867	1.05835	0.989646	1.14236	1.02681	0.597806
Q63190	Emerin OS=Rattus norvegicus GN=Emd PE=1 SV=1	1	1	0.994805	1.09524	0.916999	1.00958	1.00415	0.913144
Q4FZU0	Acid phosphatase 6, lysophosphatidic OS=Rattus norvegicus GN=Acp6 PE=1 SV=1	1	1	0.952775	1.23281	0.987124	1.27725	1.11249	0.224561
Q6AXY8	Dehydrogenase/reductase (SDR family) member 1 OS=Rattus norvegicus GN=Dhrs1 PE=1 SV=1	1	1	0.964047	1.03094	0.988851	1.05746	1.01032	0.639135
G3V9K3	Coxsackie virus and adenovirus receptor-like 1 OS=Rattus norvegicus GN=LOC103690070 PE=4 SV=1	2	2	1.09384	0.970616	1.10855	0.98367	1.03917	0.31878
P12839	Neurofilament medium polypeptide OS=Rattus norvegicus GN=Nefm PE=1 SV=4	4	2	0.572705	0.670471	0.87292	1.02194	0.784508	0.076497
Q566R4	Leucine repeat adapter protein 25 OS=Rattus norvegicus GN=Fam89b PE=1 SV=1	1	1	0.870677	1.0812	0.947627	1.17676	1.01907	0.789263
F1LP01	Diacylglycerol kinase OS=Rattus norvegicus GN=Dgkb PE=1 SV=2	2	2	0.973928	1.10261	0.91397	1.03473	1.00631	0.881252
A0JPQ5	Similar to DNA segment, Chr 18, Wayne State University 98, expressed (Predicted), isoform CRA_c OS=Rattus norvegicus GN=RGD1560212 PE=1 SV=1	1	1	0.878696	0.826384	1.143	1.07495	0.980757	0.808744
D4A6E6	Heparan-sulfate 6-O-sulfotransferase OS=Rattus norvegicus GN=Hs6st1 PE=1 SV=2	1	1	0.813333	0.998596	0.904056	1.10998	0.956493	0.519612
Q5PPL2	DCN1-like protein 5 OS=Rattus norvegicus GN=Dcun1d5 PE=2 SV=1	1	1	0.97973	1.10811	1.0131	1.14585	1.0617	0.165367
Q66HG9	Mitochondrial antiviral-signaling protein OS=Rattus norvegicus GN=Mavs PE=1 SV=1	1	1	0.992301	1.06245	0.986395	1.05612	1.02432	0.275423
Q5M860	Rho GDP dissociation inhibitor beta OS=Rattus norvegicus GN=Arhgdib PE=1 SV=1	1	1	1.07907	1.15163	0.980558	1.04649	1.06444	0.119931
A0A0G2JSL4	Tuberin OS=Rattus norvegicus GN=Tsc2 PE=1 SV=1	1	1	0.925778	1.06145	0.876795	1.00529	0.967329	0.456448
A0A0G2JT78	RAB6B, member RAS oncogene family OS=Rattus norvegicus GN=Rab6b PE=4 SV=1	4	1	0.941558	1.11769	0.851064	1.01027	0.980147	0.736234
P26453	Basigin OS=Rattus norvegicus GN=Bsg PE=1 SV=2	2	2	1.17748	1.20892	1.09839	1.12772	1.15313	0.000819762
F1LW91	Nuclear mitotic apparatus protein 1 OS=Rattus norvegicus GN=Numa1 PE=1 SV=2	52	1	1.02653	0.966401	1.04783	0.986462	1.00681	0.725962
D3ZUJ8	Transmembrane and tetratricopeptide repeat containing 3 (Predicted), isoform CRA_a OS=Rattus norvegicus GN=Tmtc3 PE=1 SV=1	3	3	1.05818	1.15364	1.05054	1.14531	1.10192	0.0101006
A0A0G2K9U6	Autophagy-related 16-like 1 OS=Rattus norvegicus GN=Atg16l1 PE=1 SV=1	1	1	1.15575	1.2381	1.0328	1.10638	1.13326	0.0213742
Q68FT3	Pyridine nucleotide-disulfide oxidoreductase domain-containing protein 2 OS=Rattus norvegicus GN=Pyroxd2 PE=2 SV=1	1	1	1.03644	0.976	0.990654	0.93288	0.983995	0.481886
D3ZF13	Acyl carrier protein OS=Rattus norvegicus GN=Ndufab1 PE=1 SV=1	1	1	0.932854	0.888889	1.07756	1.02678	0.981521	0.682602
D3ZGN0	TBC1 domain family, member 4 OS=Rattus norvegicus GN=Tbc1d4 PE=1 SV=3	6	6	0.962871	1.06436	0.894253	0.988506	0.977497	0.545468
A0A096MJY1	Glypican 6 OS=Rattus norvegicus GN=Gpc6 PE=1 SV=1	2	1	0.886864	0.899013	1.01654	1.03046	0.958219	0.312267
A0A0G2K0P1	Kinesin-associated protein 3 OS=Rattus norvegicus GN=Kifap3 PE=1 SV=1	2	2	0.946515	0.946515	0.960526	0.960526	0.953521	2.60813e-05
D3ZFJ3	SH3 domain-binding protein 1 OS=Rattus norvegicus GN=Sh3bp1 PE=1 SV=1	3	3	1.17706	1.22334	1.05216	1.09353	1.13652	0.012661
Q9Z0V5	Peroxiredoxin-4 OS=Rattus norvegicus GN=Prdx4 PE=2 SV=1	5	3	0.950447	0.976442	0.952769	0.978827	0.964621	0.00336198
P05982	NAD(P)H dehydrogenase [quinone] 1 OS=Rattus norvegicus GN=Nqo1 PE=1 SV=4	2	2	0.952071	0.86515	0.973422	0.884551	0.918799	0.0206531
A0A0G2K782	Zinc finger, C2HC-type-containing 1A OS=Rattus norvegicus GN=Zc2hc1a PE=1 SV=1	1	1	0.831796	0.87083	0.859868	0.90022	0.865679	7.77698e-05
D3ZIV8	YTH domain-containing 2 OS=Rattus norvegicus GN=Ythdc2 PE=1 SV=3	1	1	0.935407	0.874003	0.994911	0.929601	0.933481	0.0359829
Q8CGU6	Nicastrin OS=Rattus norvegicus GN=Ncstn PE=1 SV=1	4	4	0.85558	0.989059	0.886621	1.02494	0.939051	0.182206
D4ADI8	Cell division cycle-associated 2 OS=Rattus norvegicus GN=Cdca2 PE=1 SV=1	1	1	1.18228	1.20645	1.03073	1.0518	1.11781	0.0386968
D4AAH6	Down syndrome critical region homolog 2 (Human) (Predicted), isoform CRA_b OS=Rattus norvegicus GN=Psmg1 PE=1 SV=3	1	1	0.89142	1.00456	1.00085	1.12788	1.00618	0.902455
Q498M4	WD repeat-containing protein 5 OS=Rattus norvegicus GN=Wdr5 PE=1 SV=1	2	2	0.877703	0.982849	0.879671	0.985052	0.931319	0.0645678
B2GUZ7	Tubulin folding cofactor C OS=Rattus norvegicus GN=Tbcc PE=1 SV=1	4	4	1.27018	1.08719	1.07273	0.918182	1.08707	0.272204
D3ZX42	G protein-coupled receptor 21 (Predicted), isoform CRA_a OS=Rattus norvegicus GN=Rabgap1 PE=1 SV=1	2	2	1.08556	0.99816	0.829234	0.762474	0.918856	0.317751
Q5BK37	RCG53872, isoform CRA_a OS=Rattus norvegicus GN=Arhgef1 PE=2 SV=1	3	3	1.03229	1.18935	1.05062	1.21048	1.12069	0.0396954
M0RC77	Kynurenine formamidase OS=Rattus norvegicus GN=Afmid PE=1 SV=1	1	1	0.986656	1.02252	0.984193	1.01997	1.00333	0.75866
Q5MJ12	F-box/LRR-repeat protein 16 OS=Rattus norvegicus GN=Fbxl16 PE=2 SV=1	1	1	1.06379	1.06469	1.05058	1.05146	1.05763	5.3887e-06
D4A7N1	MICOS complex subunit Mic25 OS=Rattus norvegicus GN=Chchd6 PE=1 SV=1	3	3	1.04489	1.08891	0.966612	1.00733	1.02694	0.342176
D3ZD79	Absent in melanoma 1 OS=Rattus norvegicus GN=Aim1 PE=1 SV=3	1	1	0.991653	1.0192	1.08098	1.11101	1.05071	0.114059
F1MA36	Spectrin beta chain OS=Rattus norvegicus GN=Sptbn2 PE=1 SV=2	10	3	0.871062	0.998535	0.981023	1.12459	0.993802	0.908883
A0A096MJ99	Vesicle-associated membrane protein 4 OS=Rattus norvegicus GN=Vamp4 PE=1 SV=1	3	3	1.0232	1.15292	0.934118	1.05255	1.0407	0.40157
B0BNF6	Membrane-associated ring finger (C3HC4) 5 OS=Rattus norvegicus GN=March5 PE=1 SV=1	1	1	0.991681	0.940932	0.995823	0.944862	0.968324	0.075013
A0A0G2KA20	Guanine nucleotide exchange factor DBS OS=Rattus norvegicus GN=Mcf2l PE=1 SV=1	3	3	0.947536	1.37838	0.943038	1.37184	1.1602	0.244216
M0R953	High mobility group nucleosome-binding domain-containing protein 3 OS=Rattus norvegicus GN=Hmgn3 PE=1 SV=1	1	1	1.05393	0.90893	0.878408	0.757553	0.899707	0.15079
Q5FVM1	Transmembrane protein 231 OS=Rattus norvegicus GN=Tmem231 PE=2 SV=2	1	1	0.903104	1.0265	0.936421	1.06436	0.982596	0.66068
P97526	Neurofibromin OS=Rattus norvegicus GN=Nf1 PE=1 SV=1	5	5	0.805537	0.858204	0.916283	0.97619	0.889053	0.0235813
Q5M876	N-acyl-aromatic-L-amino acid amidohydrolase (carboxylate-forming) OS=Rattus norvegicus GN=Acy3 PE=1 SV=1	1	1	0.833101	1.10754	0.822759	1.09379	0.964299	0.666468
Q6AYU1	Mortality factor 4-like protein 1 OS=Rattus norvegicus GN=Morf4l1 PE=2 SV=1	1	1	0.941686	1.03861	0.985161	1.08656	1.01301	0.694299
Q4QQS8	Nuclear pore complex protein Nup85 OS=Rattus norvegicus GN=Nup85 PE=2 SV=1	5	5	0.898801	1.20765	0.843179	1.13291	1.02063	0.823324
A0A0H2UHP5	Chromodomain-helicase-DNA-binding protein 5 OS=Rattus norvegicus GN=Chd5 PE=4 SV=1	8	2	1.02041	1.08418	1.06007	1.12633	1.07275	0.0168144
B2RYW4	39S ribosomal protein L53, mitochondrial OS=Rattus norvegicus GN=Mrpl53 PE=1 SV=1	1	1	0.9427	1.06436	0.993383	1.12159	1.03051	0.467016
D3ZSE0	40S ribosomal protein S21 OS=Rattus norvegicus GN=Rps21-ps1 PE=3 SV=1	1	1	0.965434	0.872186	0.974047	0.879968	0.922909	0.0295554
P61078	Ubiquitin-conjugating enzyme E2 D3 OS=Rattus norvegicus GN=Ube2d3 PE=2 SV=1	1	1	1.12722	1.058	1.07302	1.00712	1.06634	0.0363077
F1M6V8	Striatin 4 OS=Rattus norvegicus GN=Strn4 PE=1 SV=1	3	2	0.928351	1.00847	0.897245	0.974684	0.952189	0.0999341
A0A0G2K7T2	Bifunctional UDP-N-acetylglucosamine 2-epimerase/N-acetylmannosamine kinase OS=Rattus norvegicus GN=Gne PE=1 SV=1	3	3	0.93784	1.09246	0.995054	1.15911	1.04612	0.386286
Q7TS62	Bcl-2-like protein 1 OS=Rattus norvegicus GN=Bcl2l1 PE=1 SV=1	2	2	0.986949	1.25612	0.927203	1.18008	1.08759	0.303785
B0BN97	Txndc12 protein (Fragment) OS=Rattus norvegicus GN=Txndc12 PE=2 SV=1	2	2	1.00498	1.07137	1.04038	1.10911	1.05646	0.0437502
P97615	Thioredoxin, mitochondrial OS=Rattus norvegicus GN=Txn2 PE=2 SV=1	1	1	1.07733	1.02133	1.06503	1.00967	1.04334	0.0387514
Q6XVN8	Microtubule-associated proteins 1A/1B light chain 3A OS=Rattus norvegicus GN=Map1lc3a PE=1 SV=1	1	1	0.950588	0.963922	1.04034	1.05494	1.00245	0.929167
A0A0G2JVD6	Lysine methyltransferase 2D OS=Rattus norvegicus GN=Kmt2d PE=1 SV=1	1	1	0.983766	0.931006	0.985366	0.93252	0.958165	0.0335841
Q5I0F0	Developmentally-regulated GTP-binding protein 1 OS=Rattus norvegicus GN=Drg1 PE=1 SV=1	2	2	0.949883	1.01958	0.925954	0.993893	0.972327	0.237991
D3Z8L7	Ras-related protein R-Ras OS=Rattus norvegicus GN=Rras PE=1 SV=1	3	3	1.00165	1.12799	0.842361	0.948611	0.980154	0.749558
P43424	Galactose-1-phosphate uridylyltransferase OS=Rattus norvegicus GN=Galt PE=2 SV=1	1	1	1.1518	1.17078	1.09173	1.10971	1.131	0.000372829
P97544	Phospholipid phosphatase 3 OS=Rattus norvegicus GN=Plpp3 PE=1 SV=1	1	1	0.982996	1.04049	0.927426	0.981665	0.983143	0.492772
Q5BK18	Cytosolic Fe-S cluster assembly factor NARFL OS=Rattus norvegicus GN=Narfl PE=2 SV=1	1	1	1.43787	1.03669	1.19118	0.858824	1.13114	0.326396
F8WFW5	Phosphodiesterase OS=Rattus norvegicus GN=Pde2a PE=1 SV=1	4	4	0.811081	0.903872	0.859264	0.957567	0.882946	0.00958085
A0A0H2UHC8	Ubiquitin-like domain-containing CTD phosphatase 1 OS=Rattus norvegicus GN=Ublcp1 PE=1 SV=1	2	2	0.914974	1.34913	0.837466	1.23485	1.08411	0.520573
P97584	Prostaglandin reductase 1 OS=Rattus norvegicus GN=Ptgr1 PE=2 SV=3	3	3	0.838134	0.963649	0.845675	0.972318	0.904944	0.0403191
B1WBQ7	DNA mismatch repair protein OS=Rattus norvegicus GN=Msh2 PE=1 SV=1	2	2	0.932927	1.04573	0.945174	1.05946	0.995823	0.903387
Q1PS21	DNA helicase OS=Rattus norvegicus GN=Mcm7 PE=2 SV=1	1	1	0.955573	1.09353	1.02508	1.17308	1.06182	0.232626
O70595	ATP-binding cassette sub-family B member 6, mitochondrial OS=Rattus norvegicus GN=Abcb6 PE=2 SV=1	2	2	0.950388	1.02171	0.991108	1.06548	1.00717	0.777997
Q68FU8	SURP and G-patch domain-containing protein 1 OS=Rattus norvegicus GN=Sugp1 PE=1 SV=1	1	1	1.07713	1.13585	1.03888	1.09552	1.08684	0.00503516
D4ABK7	Heterogeneous nuclear ribonucleoprotein H3 OS=Rattus norvegicus GN=Hnrnph3 PE=1 SV=1	4	3	0.882268	1.09835	0.869781	1.0828	0.9833	0.796902
A0A0G2K719	DEAD-box helicase 3, X-linked OS=Rattus norvegicus GN=Ddx3x PE=1 SV=1	19	1	0.991136	1.1249	0.905744	1.02798	1.01244	0.793231
A0A0G2JZY3	RALBP1-associated Eps domain-containing 1 OS=Rattus norvegicus GN=Reps1 PE=1 SV=1	4	4	0.871469	0.956921	0.962559	1.05694	0.961973	0.354409
A0A0H2UH94	GRIP and coiled-coil domain-containing protein 2 OS=Rattus norvegicus GN=Gcc2 PE=1 SV=1	7	7	1.0232	1.00829	0.934898	0.921272	0.971913	0.315306
A0A0G2JZ60	Fibronectin type III and SPRY domain-containing 1-like OS=Rattus norvegicus GN=Fsd1l PE=4 SV=1	1	1	0.92997	1.04819	0.858832	0.968011	0.951251	0.262719
Q5BJR4	Protein prune homolog 2 OS=Rattus norvegicus GN=Prune2 PE=1 SV=1	1	1	1.06089	1.06947	0.995974	1.00403	1.03259	0.136579
D3ZHZ3	Oxysterol-binding protein OS=Rattus norvegicus GN=Osbpl3 PE=1 SV=2	1	1	0.910898	0.907216	0.961897	0.958009	0.934505	0.00435036
Q5BJP9	Phytanoyl-CoA dioxygenase domain-containing protein 1 OS=Rattus norvegicus GN=Phyhd1 PE=2 SV=1	1	1	1.02817	1.0464	0.930285	0.946777	0.987907	0.690633
G3V7V3	Solute carrier family 27 (Fatty acid transporter), member 4 OS=Rattus norvegicus GN=Slc27a4 PE=1 SV=1	2	2	1.13841	1.15399	1.12909	1.14455	1.14151	1.69214e-07
A0A0G2JXZ9	Protein tyrosine phosphatase, receptor type, J OS=Rattus norvegicus GN=Ptprj PE=1 SV=1	1	1	1.06885	1.0525	0.962045	0.947328	1.00768	0.812168
Q2M2S1	RCG45853 OS=Rattus norvegicus GN=Tor1b PE=1 SV=1	2	2	0.912628	1.19236	0.824271	1.07692	1.00155	0.985629
D3ZUU8	SEC14-like protein 3 OS=Rattus norvegicus GN=Sec14l4 PE=1 SV=1	2	2	1.03926	0.9599	1.04714	0.967172	1.00337	0.888841
D3ZHG3	Protein tyrosine kinase 7 OS=Rattus norvegicus GN=Ptk7 PE=3 SV=3	2	2	0.93633	1.00974	0.982704	1.05975	0.99713	0.91504
G3V787	25-hydroxycholesterol 7-alpha-hydroxylase OS=Rattus norvegicus GN=Cyp7b1 PE=1 SV=1	1	1	0.969744	1.18619	0.923873	1.13008	1.05247	0.435228
D3ZTW1	Integrator complex subunit 5 OS=Rattus norvegicus GN=Ints5 PE=4 SV=1	1	1	1.09737	1.15175	0.959356	1.0069	1.05385	0.261129
D3ZUV9	CCR4-NOT transcription complex, subunit 3 OS=Rattus norvegicus GN=Cnot3 PE=1 SV=2	2	2	1.0032	0.9416	0.963134	0.903994	0.952982	0.063784
A0A0G2JZH9	DExH-box helicase 57 OS=Rattus norvegicus GN=Dhx57 PE=4 SV=1	2	2	1.04674	1.18197	0.905415	1.02238	1.03913	0.516152
B0BN94	Protein FAM136A OS=Rattus norvegicus GN=Fam136a PE=1 SV=1	1	1	0.91087	0.980435	0.950832	1.02345	0.966396	0.207101
Q63415	Proprotein convertase subtilisin/kexin type 6 OS=Rattus norvegicus GN=Pcsk6 PE=1 SV=1	1	1	1.02859	0.95098	1.00319	0.92749	0.977563	0.371388
P35433	Amidophosphoribosyltransferase OS=Rattus norvegicus GN=Ppat PE=1 SV=1	2	2	1.01614	1.06295	0.951625	0.995465	1.00655	0.786553
Q66H15	Regulator of microtubule dynamics protein 3 OS=Rattus norvegicus GN=Rmdn3 PE=1 SV=1	2	2	0.889753	1.05159	0.884751	1.04568	0.967943	0.51732
A0A0G2JU56	Non-specific serine/threonine protein kinase OS=Rattus norvegicus GN=Mark3 PE=1 SV=1	1	1	0.838989	1.00266	0.924487	1.10484	0.967744	0.589531
Q53UA7	Serine/threonine-protein kinase TAO3 OS=Rattus norvegicus GN=Taok3 PE=1 SV=1	1	1	1.01447	1.14711	1.04557	1.18227	1.09735	0.0510619
Q66HA7	Core-binding factor, beta subunit OS=Rattus norvegicus GN=Cbfb PE=1 SV=1	1	1	1.02602	1.10813	0.985938	1.06484	1.04623	0.127789
Q6P756	Adaptin ear-binding coat-associated protein 2 OS=Rattus norvegicus GN=Necap2 PE=1 SV=2	1	1	1.055	1.025	1.07288	1.04237	1.04881	0.00291286
Q4KLH7	RAD21 cohesin complex component OS=Rattus norvegicus GN=Rad21 PE=1 SV=1	6	6	1.00079	1.09012	0.992163	1.08072	1.04095	0.163679
P49744	Thrombospondin-4 OS=Rattus norvegicus GN=Thbs4 PE=1 SV=1	3	3	0.826484	0.861709	1.11238	1.15979	0.99009	0.911148
F1LRJ9	Selenium-binding protein 1 OS=Rattus norvegicus GN=Selenbp1 PE=1 SV=2	1	1	1.03089	0.97561	0.972393	0.920245	0.974786	0.307241
A0A0G2JVW1	Insulin-like growth factor-binding protein 5 OS=Rattus norvegicus GN=Igfbp5 PE=4 SV=1	1	1	1.00635	1.05714	0.83476	0.876893	0.943786	0.325794
Z4YNF4	Low molecular weight phosphotyrosine protein phosphatase OS=Rattus norvegicus GN=Acp1 PE=1 SV=2	1	1	0.972414	0.977011	0.979923	0.984556	0.978476	0.000150509
Q8CHN6	Sphingosine-1-phosphate lyase 1 OS=Rattus norvegicus GN=Sgpl1 PE=2 SV=1	3	3	0.980695	0.985328	0.994518	0.999217	0.98994	0.0544973
D3ZXX3	Unc-80 homolog, NALCN channel complex subunit (Fragment) OS=Rattus norvegicus GN=Unc80 PE=4 SV=3	2	2	1.03412	1.18928	0.974732	1.12098	1.07978	0.142401
P20611	Lysosomal acid phosphatase OS=Rattus norvegicus GN=Acp2 PE=1 SV=1	2	2	1.08149	1.23345	0.933333	1.06447	1.07819	0.250211
Q99P75	Ras-related protein Rab-9A OS=Rattus norvegicus GN=Rab9a PE=1 SV=2	1	1	0.989147	1.11163	0.942393	1.05908	1.02556	0.519665
G3V9M6	Fibrillin 1 OS=Rattus norvegicus GN=Fbn1 PE=1 SV=1	4	4	0.866531	1.16667	0.979326	1.31853	1.08276	0.439694
G3V784	ADP-dependent glucokinase OS=Rattus norvegicus GN=Adpgk PE=1 SV=1	3	3	0.977082	1.05882	0.913571	0.99	0.984869	0.629485
D4A3T0	SOS Ras/Rac guanine nucleotide exchange factor 1 OS=Rattus norvegicus GN=Sos1 PE=1 SV=2	2	2	0.958771	1.006	0.84927	0.891102	0.926285	0.0788367
Q6PLD8	Candidate plasticity protein 2b OS=Rattus norvegicus GN=Cpg2b PE=2 SV=1	3	3	0.902817	0.888028	0.900914	0.886156	0.894479	3.00856e-07
D3ZWJ9	Family with sequence similarity 234, member B OS=Rattus norvegicus GN=Fam234b PE=1 SV=1	1	1	1.04649	0.966558	1.05771	0.976917	1.01192	0.628794
P08289	Alkaline phosphatase, tissue-nonspecific isozyme OS=Rattus norvegicus GN=Alpl PE=1 SV=2	2	2	0.860496	0.877934	0.936496	0.955474	0.9076	0.00667596
O08874	Serine/threonine-protein kinase N2 OS=Rattus norvegicus GN=Pkn2 PE=1 SV=2	3	2	1.01341	1.14038	1.05936	1.19209	1.10131	0.0447311
F1LUS2	Protein argonaute-3 OS=Rattus norvegicus GN=Ago3 PE=3 SV=3	3	2	1.10206	1.04803	1.04387	0.992689	1.04666	0.0818029
Q3KRD5	Mitochondrial import receptor subunit TOM34 OS=Rattus norvegicus GN=Tomm34 PE=1 SV=1	5	5	0.880383	1.03008	0.819338	0.958651	0.922112	0.140725
Q5PPL3	Sterol-4-alpha-carboxylate 3-dehydrogenase, decarboxylating OS=Rattus norvegicus GN=Nsdhl PE=2 SV=1	1	1	1.08868	0.994088	1.07866	0.984937	1.03659	0.22898
A0A0G2KB07	NADH-cytochrome b5 reductase OS=Rattus norvegicus GN=Cyb5r2 PE=3 SV=1	2	2	1.01018	1.01958	0.898955	0.907317	0.959007	0.25218
Q9QY02	YTH domain-containing protein 1 OS=Rattus norvegicus GN=Ythdc1 PE=1 SV=2	1	1	1.38034	1.1891	1.04194	0.897581	1.12724	0.263884
D3ZZM3	Component of oligomeric golgi complex 4 OS=Rattus norvegicus GN=Cog4 PE=1 SV=1	1	1	0.997683	1.04942	0.95421	1.00369	1.00125	0.950845
O54892	Mutant type II hexokinase OS=Rattus norvegicus GN=Hk2 PE=2 SV=1	3	2	1.11831	1.15976	1.11159	1.15279	1.13561	3.00228e-05
Q99PW1	Tyrosine-protein kinase (Fragment) OS=Rattus norvegicus GN=Yes1 PE=2 SV=1	4	1	0.87323	1.14026	0.903068	1.17922	1.02394	0.772168
B5DF86	Conserved oligomeric Golgi complex subunit 8 OS=Rattus norvegicus GN=Cog8 PE=1 SV=1	3	3	1.04509	1.06119	1.02285	1.03861	1.04194	0.00185856
Q66H71	Serine/threonine-protein phosphatase CPPED1 OS=Rattus norvegicus GN=Cpped1 PE=1 SV=1	3	3	0.980363	1.06571	1.01644	1.10493	1.04186	0.176711
A0A0G2JSM0	DnaJ (Hsp40) homolog, subfamily C, member 2 OS=Rattus norvegicus GN=Dnajc2 PE=1 SV=1	2	2	0.91094	1.02104	0.970127	1.08738	0.997371	0.946381
F7EUU4	COP9 signalosome subunit 5 OS=Rattus norvegicus GN=Cops5 PE=1 SV=1	3	3	0.909664	1.03291	0.946103	1.07429	0.990743	0.815628
D3Z937	High mobility group 20A OS=Rattus norvegicus GN=Hmg20a PE=1 SV=1	2	2	1.03165	1.18354	1.00617	1.15432	1.09392	0.0768527
Q6QI89	Mortality factor 4-like protein 2 OS=Rattus norvegicus GN=Morf4l2 PE=2 SV=1	1	1	0.955311	1.08571	0.822194	0.934426	0.949412	0.385199
Q9QXY4	Opioid growth factor receptor OS=Rattus norvegicus GN=Ogfr PE=1 SV=1	2	2	1.03407	1.0103	0.992395	0.969582	1.00159	0.911276
F1M6T6	Protein phosphatase 6, regulatory subunit 2 OS=Rattus norvegicus GN=Ppp6r2 PE=1 SV=3	3	3	0.943642	1.17702	0.919071	1.14638	1.04653	0.513235
Q9WUD9-2	Isoform 2 of Proto-oncogene tyrosine-protein kinase Src OS=Rattus norvegicus GN=Src	4	1	0.563119	0.549332	0.968866	0.945145	0.756615	0.0803429
D3ZF45	La ribonucleoprotein domain family, member 4B OS=Rattus norvegicus GN=Larp4b PE=1 SV=2	2	2	1.10914	1.24112	0.983496	1.10053	1.10857	0.0848586
D4ABY4	Ubiquitin-conjugating enzyme E2, J1 OS=Rattus norvegicus GN=Ube2j1 PE=1 SV=3	1	1	0.986466	1.0218	1.03797	1.07516	1.03035	0.150222
B2RYF1	Protein phosphatase 1 regulatory subunit 37 OS=Rattus norvegicus GN=Ppp1r37 PE=1 SV=1	2	2	0.927966	1.06003	1.07003	1.22231	1.07008	0.288455
A0A0G2K1V3	Similar to RIKEN cDNA 5730449L18 (Predicted), isoform CRA_a OS=Rattus norvegicus GN=Tsen15 PE=1 SV=1	1	1	0.974093	0.954848	1.0461	1.02544	1.00012	0.99567
A0A0G2K4P5	NF-kappa-B-activating protein OS=Rattus norvegicus GN=Nkap PE=1 SV=1	1	1	0.988756	1.13718	0.92822	1.06756	1.03043	0.529443
D3ZJ86	Sodium/hydrogen exchanger OS=Rattus norvegicus GN=Slc9a6 PE=1 SV=2	2	2	0.982156	0.915985	1.0185	0.949884	0.966632	0.179144
A8WCF8	Tumor protein p63-regulated gene 1-like protein OS=Rattus norvegicus GN=Tprg1l PE=1 SV=1	1	1	0.964938	1.00804	0.981426	1.02526	0.994915	0.718553
F1LMM8	[Pyruvate dehydrogenase (acetyl-transferring)] kinase isozyme 2, mitochondrial OS=Rattus norvegicus GN=Pdk2 PE=1 SV=3	1	1	0.924476	1.08322	0.868594	1.01774	0.973507	0.599343
Q5QE80	Aldehyde oxidase 3 OS=Rattus norvegicus GN=Aox3 PE=1 SV=1	1	1	0.868024	0.931057	0.789254	0.846567	0.858725	0.00292852
F1LV89	Rap1 GTPase-activating protein OS=Rattus norvegicus GN=Rap1gap PE=1 SV=3	2	2	0.973568	1.00587	1.01687	1.05061	1.01173	0.488126
O35568	EGF-containing fibulin-like extracellular matrix protein 1 OS=Rattus norvegicus GN=Efemp1 PE=1 SV=1	1	1	1.08956	1.13969	0.936441	0.97952	1.0363	0.4709
F1M4J1	Dyslexia susceptibility 2-like OS=Rattus norvegicus GN=LOC100294508 PE=1 SV=2	2	2	1.06672	0.960611	1.09308	0.984349	1.02619	0.442266
F1M7Q5	AMP deaminase OS=Rattus norvegicus GN=Ampd3 PE=1 SV=2	1	1	1.00454	1.09235	0.963689	1.04793	1.02713	0.36556
Q9Z327-2	Isoform 2 of Synaptopodin OS=Rattus norvegicus GN=Synpo	1	1	0.993263	0.947605	0.935166	0.892178	0.942053	0.0317103
Q5BJQ0	Atypical kinase COQ8A, mitochondrial OS=Rattus norvegicus GN=Coq8a PE=2 SV=1	2	2	0.899729	0.98916	0.910212	1.00069	0.949947	0.104232
A0A0G2K1E5	Symplekin OS=Rattus norvegicus GN=Sympk PE=1 SV=1	5	5	0.805825	0.977549	0.887108	1.07615	0.936658	0.318523
M0RCH6	Uncharacterized protein OS=Rattus norvegicus PE=1 SV=2	6	1	0.962346	0.951484	1.10108	1.08865	1.02589	0.541089
G3V8F8	Nestin OS=Rattus norvegicus GN=Nes PE=1 SV=1	1	1	1.16477	1.11832	1.08401	1.04078	1.10197	0.00814591
A0A0G2JTN8	ATP synthase F(0) complex subunit C2, mitochondrial OS=Rattus norvegicus GN=Atp5g2 PE=3 SV=1	1	1	1.07955	0.955357	1.06145	0.939346	1.00893	0.811901
Q5HZY2	GTP-binding protein SAR1b OS=Rattus norvegicus GN=Sar1b PE=2 SV=1	4	2	0.924411	0.959778	0.92892	0.96446	0.944392	0.00168253
A0A0G2K9L6	Protein kinase C-binding protein Beta15, isoform CRA_a OS=Rattus norvegicus GN=Rbck1 PE=1 SV=1	4	4	0.993309	1.17249	0.997015	1.17687	1.08492	0.152479
Q9EPJ3	28S ribosomal protein S26, mitochondrial OS=Rattus norvegicus GN=Mrps26 PE=1 SV=1	1	1	0.984525	1.06927	0.995529	1.08122	1.03264	0.236606
Q6AY87	THO complex subunit 6 homolog OS=Rattus norvegicus GN=Thoc6 PE=2 SV=1	1	1	0.975182	1.05401	0.993309	1.07361	1.02403	0.348007
A0A0G2K9P5	Component of oligomeric golgi complex 5 OS=Rattus norvegicus GN=Cog5 PE=1 SV=1	3	3	1.01829	1.01143	0.973052	0.966497	0.992319	0.580665
G3V6C3	Polysaccharide biosynthesis domain-containing 1 OS=Rattus norvegicus GN=Pbdc1 PE=1 SV=1	3	3	1.07736	1.16197	1.04372	1.12568	1.10218	0.00781819
M0RAQ6	Hexokinase-1 OS=Rattus norvegicus GN=Hk1 PE=1 SV=2	20	1	0.964672	1.05912	0.877377	0.963279	0.966112	0.396477
D3ZSZ6	Diacylglycerol kinase OS=Rattus norvegicus GN=Dgkh PE=1 SV=3	1	1	0.908722	0.927654	0.998514	1.01932	0.963552	0.222898
Q6P9U3	COMM domain-containing protein 3 OS=Rattus norvegicus GN=Commd3 PE=1 SV=1	2	2	0.843162	0.986198	0.957947	1.12046	0.976941	0.699664
Q641Z4	Cyclin-dependent kinase 9 OS=Rattus norvegicus GN=Cdk9 PE=2 SV=1	1	1	0.994092	1.13589	0.918145	1.04911	1.02431	0.615159
A0A096MKG5	NAD kinase 2, mitochondrial OS=Rattus norvegicus GN=Nadk2 PE=1 SV=1	3	3	0.993368	1.05969	0.932872	0.995156	0.995271	0.861127
F1M9C9	Histidyl-tRNA synthetase 2, mitochondrial OS=Rattus norvegicus GN=Hars2 PE=1 SV=1	3	2	0.933564	0.948789	0.874271	0.888529	0.911288	0.00247386
Q6PEB9	Coiled-coil domain-containing protein 127 OS=Rattus norvegicus GN=Ccdc127 PE=2 SV=2	2	2	0.935551	1.03812	0.948034	1.05197	0.993416	0.833832
Q5XI41	Translocating chain-associated membrane protein 1 OS=Rattus norvegicus GN=Tram1 PE=1 SV=3	1	1	1.42017	1.12185	1.19752	0.94597	1.17138	0.131733
A0A0G2JTB6	Chloride intracellular channel protein OS=Rattus norvegicus GN=Clic6 PE=1 SV=1	5	4	1.01502	1.01727	1.01198	1.01422	1.01462	1.07582e-05
D3ZE17	Caskin-1 OS=Rattus norvegicus GN=Caskin1 PE=1 SV=2	2	2	1.03681	1.06135	1.00222	1.02595	1.03158	0.0421313
Q7TSA0	Mitochondrial Rho GTPase 2 OS=Rattus norvegicus GN=Rhot2 PE=2 SV=1	3	2	1.0384	0.991551	0.948107	0.90533	0.970848	0.347074
A0A0G2JVR0	Receptor-type tyrosine-protein phosphatase OS=Rattus norvegicus GN=Ptpra PE=1 SV=1	1	1	0.857414	0.859316	0.93828	0.940361	0.898843	0.00494355
M0R784	Probable N-acetyltransferase CML2-like OS=Rattus norvegicus GN=LOC100910829 PE=4 SV=1	1	1	1.03046	0.974105	0.901399	0.852099	0.939517	0.175011
B8PS68	C-type lectin-related protein 2 (Fragment) OS=Rattus norvegicus GN=Clec2d2 PE=2 SV=1	2	2	1.18325	1.02618	1.13854	0.987406	1.08384	0.118808
A0A1W2Q6F8	NADH dehydrogenase [ubiquinone] 1 alpha subcomplex subunit 10, mitochondrial OS=Rattus norvegicus GN=Ndufa10l1 PE=3 SV=1	1	1	0.987627	0.913392	0.956982	0.885049	0.935762	0.0302255
A0A096MIV5	ATP-binding cassette subfamily F member 2 OS=Rattus norvegicus GN=Abcf2 PE=1 SV=1	5	5	1.00741	1.03185	0.979827	1.0036	1.00567	0.613395
Q1HAQ0	Lysophosphatidylcholine acyltransferase 1 OS=Rattus norvegicus GN=Lpcat1 PE=2 SV=2	2	2	1.00295	1.07222	0.983382	1.0513	1.02746	0.231812
B2GVA1	Selenoprotein O OS=Rattus norvegicus GN=Selenoo PE=2 SV=1	2	2	0.973534	1.02146	0.926481	0.97209	0.973391	0.21911
F1LQG0	Huntingtin-associated protein 1 OS=Rattus norvegicus GN=Hap1 PE=1 SV=1	3	3	0.964589	1.03045	1.10552	1.18101	1.07039	0.183081
D3ZTN0	Protein kinase, DNA-activated, catalytic polypeptide OS=Rattus norvegicus GN=Prkdc PE=1 SV=3	2	2	0.981268	0.893372	0.999266	0.909758	0.945916	0.0834848
G3V6P3	RCG59977 OS=Rattus norvegicus GN=Zhx2 PE=1 SV=1	2	2	1.0326	1.03942	0.993435	1	1.01636	0.20481
A0A0G2K8N9	NIMA-related kinase 9 OS=Rattus norvegicus GN=Nek9 PE=1 SV=1	4	4	1.04601	1.03221	1.02096	1.00749	1.02667	0.0173625
A0A096MKB0	Max dimerization protein 3 OS=Rattus norvegicus GN=Rab24 PE=1 SV=1	1	1	0.983453	0.96259	1.10153	1.07816	1.03143	0.395102
A0A0G2K8M7	Tumor protein D52-like 1 OS=Rattus norvegicus GN=Tpd52l1 PE=4 SV=1	1	1	0.9293	0.991842	0.8746	0.933461	0.932301	0.0301021
Q5BJT4	Thioredoxin domain-containing protein 15 OS=Rattus norvegicus GN=Txndc15 PE=2 SV=1	2	2	0.957432	1.01745	0.812315	0.863233	0.912606	0.106767
Q5M823	NudC domain-containing protein 2 OS=Rattus norvegicus GN=Nudcd2 PE=2 SV=1	2	2	0.913072	1.02853	0.876433	0.987261	0.951325	0.208545
Q5XI04	RCG45489, isoform CRA_a OS=Rattus norvegicus GN=Stom PE=1 SV=1	3	3	0.972458	0.961158	0.997826	0.986232	0.979418	0.0421015
Q9WVJ4	Synaptojanin-2-binding protein OS=Rattus norvegicus GN=Synj2bp PE=1 SV=2	2	2	0.916168	0.884232	0.952941	0.919723	0.918266	0.00113168
Q5RKH0	Putative oxidoreductase GLYR1 OS=Rattus norvegicus GN=Glyr1 PE=1 SV=1	3	3	1.02227	1.15961	0.857944	0.973209	1.00326	0.960079
P13599	IgG receptor FcRn large subunit p51 OS=Rattus norvegicus GN=Fcgrt PE=1 SV=1	2	2	0.979403	0.928977	1.01323	0.961058	0.970666	0.146659
P11506-1	Isoform WB of Plasma membrane calcium-transporting ATPase 2 OS=Rattus norvegicus GN=Atp2b2	8	3	1.13498	1.0749	1.00804	0.954678	1.04315	0.313927
Q6P734	Plasma protease C1 inhibitor OS=Rattus norvegicus GN=Serping1 PE=2 SV=1	1	1	1.03371	1.14457	1.10843	1.22731	1.12851	0.0187125
D3ZPY0	WT1-associated protein OS=Rattus norvegicus GN=Wtap PE=1 SV=1	2	2	0.890032	0.938907	0.910526	0.960526	0.924998	0.00289589
E9PTX3	Hook microtubule-tethering protein 2 OS=Rattus norvegicus GN=Hook2 PE=1 SV=2	1	1	0.952512	1.00895	0.808884	0.856809	0.906788	0.0852593
B0BNA5	Coactosin-like protein OS=Rattus norvegicus GN=Cotl1 PE=1 SV=1	5	5	1.32156	0.997137	1.45636	1.09884	1.21848	0.0810501
A0A0G2JYR1	Exocyst complex component OS=Rattus norvegicus GN=Exoc6b PE=1 SV=1	1	1	0.85459	0.949476	0.820225	0.911295	0.883897	0.00688708
D3ZAX5	Calcium homeostasis endoplasmic reticulum protein OS=Rattus norvegicus GN=Cherp PE=1 SV=2	3	3	0.97267	0.939033	1.04204	1.00601	0.989938	0.664943
Q66H94	Peptidyl-prolyl cis-trans isomerase FKBP9 OS=Rattus norvegicus GN=Fkbp9 PE=2 SV=1	1	1	0.942935	0.998641	0.994269	1.05301	0.997214	0.905444
D3ZJ92	Pre-mRNA processing factor 40 homolog A (Yeast) (Predicted) OS=Rattus norvegicus GN=Prpf40a PE=1 SV=1	4	4	0.957902	1.01104	0.963889	1.01736	0.987549	0.452164
G3V7X4	ATP-binding cassette sub-family A member 2 OS=Rattus norvegicus GN=Abca2 PE=1 SV=2	1	1	1.07668	1.19907	0.941734	1.04878	1.06657	0.254871
G3V886	ATP-dependent zinc metalloprotease YME1L1 OS=Rattus norvegicus GN=LOC108348078 PE=1 SV=1	1	1	0.9405	0.876268	1.0087	0.939811	0.94132	0.0730655
B2RYM3	Inter-alpha trypsin inhibitor, heavy chain 1 OS=Rattus norvegicus GN=Itih1 PE=1 SV=1	2	2	1.19076	1.25235	1.14851	1.20792	1.19989	8.7296e-05
Q9Z142	Transmembrane protein 33 OS=Rattus norvegicus GN=Tmem33 PE=2 SV=1	1	1	0.988636	1.04048	0.979592	1.03096	1.00992	0.536607
Q9EPR9	Phosphodiesterase OS=Rattus norvegicus GN=Pde1a PE=2 SV=1	3	2	0.931104	0.959866	0.910399	0.938522	0.934973	0.000703923
D3ZFJ6	Lactamase, beta OS=Rattus norvegicus GN=Lactb PE=1 SV=1	2	2	0.956701	1.17595	0.871634	1.07138	1.01892	0.785443
Q4V897	Coiled-coil domain-containing protein 90B, mitochondrial OS=Rattus norvegicus GN=Ccdc90b PE=2 SV=1	2	2	1.00577	0.914203	0.996429	0.905714	0.955529	0.14351
G3V9E5	Steroid sulfatase OS=Rattus norvegicus GN=Sts PE=1 SV=1	2	2	0.972879	0.920723	1.19471	1.13066	1.05474	0.429006
M0RD63	RAN-binding protein 3 OS=Rattus norvegicus GN=Ranbp3 PE=1 SV=2	3	3	0.996446	0.969439	1.01668	0.989123	0.992922	0.49553
G3V913	Heat shock 27kDa protein 1 OS=Rattus norvegicus GN=Hspb1 PE=1 SV=1	3	3	0.881207	0.963545	0.792986	0.867081	0.876205	0.0121953
A0A0G2JW14	Maspardin OS=Rattus norvegicus GN=Spg21 PE=1 SV=1	2	2	1.03693	1.05244	1.03846	1.05399	1.04546	5.4876e-05
D3ZEH1	FAT atypical cadherin 4 OS=Rattus norvegicus GN=Fat4 PE=1 SV=3	1	1	1.08327	1.06939	1.22707	1.21135	1.14777	0.0118773
A0A0G2K9J2	ATPase H+-transporting V1 subunit H OS=Rattus norvegicus GN=Atp6v1h PE=1 SV=1	1	1	1.02403	0.847779	0.972337	0.804979	0.912283	0.139119
Q561R9	Endoribonuclease LACTB2 OS=Rattus norvegicus GN=Lactb2 PE=2 SV=1	2	2	0.966323	0.952577	0.954515	0.940937	0.953588	0.000109975
D3ZP13	Sulfhydryl oxidase OS=Rattus norvegicus GN=Qsox2 PE=1 SV=1	5	5	0.991567	0.933942	0.975121	0.918452	0.954771	0.0385167
B1WBY1	Cul1 protein OS=Rattus norvegicus GN=Cul1 PE=1 SV=1	5	5	0.98743	1.00908	0.956051	0.977011	0.982393	0.161581
Q63639	Retinal dehydrogenase 2 OS=Rattus norvegicus GN=Aldh1a2 PE=1 SV=2	7	5	0.861145	0.881851	0.87069	0.891626	0.876328	1.5265e-06
D4A3D8	XPC complex subunit, DNA damage recognition and repair factor OS=Rattus norvegicus GN=Xpc PE=1 SV=1	2	2	0.82797	0.905793	0.926654	1.01375	0.918542	0.0768617
P62142	Serine/threonine-protein phosphatase PP1-beta catalytic subunit OS=Rattus norvegicus GN=Ppp1cb PE=1 SV=3	6	1	1.06231	1.17793	0.921824	1.02215	1.04605	0.417964
P04762	Catalase OS=Rattus norvegicus GN=Cat PE=1 SV=3	3	3	0.988827	1.04888	1.0366	1.09956	1.04347	0.104557
B0K040	Sh3bgr protein (Fragment) OS=Rattus norvegicus GN=Sh3bgr PE=2 SV=1	1	1	0.806838	0.832479	0.846384	0.873282	0.839745	2.51505e-05
Q642G4	Peroxisomal membrane protein PEX14 OS=Rattus norvegicus GN=Pex14 PE=1 SV=1	2	2	1.13713	1.16199	1.02754	1.05	1.09416	0.02809
A0A0G2JYN4	ERGIC and golgi 2 OS=Rattus norvegicus GN=Ergic2 PE=1 SV=1	1	1	0.939073	1.02384	0.960705	1.04743	0.992761	0.786851
D3ZNK1	Metaxin 3 OS=Rattus norvegicus GN=Mtx3 PE=1 SV=2	1	1	1.00853	1.04549	0.975928	1.01169	1.01041	0.491593
P79599	Mature alpha chain of major histocompatibility complex class I antigen (Fragment) OS=Rattus norvegicus GN=RT1.A1(0) PE=2 SV=1	5	1	0.96206	0.922087	0.981341	0.940567	0.951513	0.00930674
Q4KM57	LEM domain-containing 2 OS=Rattus norvegicus GN=Lemd2 PE=1 SV=1	2	2	1.01646	1.17681	0.972603	1.12603	1.07298	0.173929
A0A0G2JV99	Minichromosome maintenance complex component 3-associated protein OS=Rattus norvegicus GN=Mcm3ap PE=1 SV=1	2	2	0.995792	1.12833	0.907928	1.02877	1.01521	0.749716
G3V645	2'-5'-oligoadenylate synthase-like protein 1 OS=Rattus norvegicus GN=Oasl PE=2 SV=1	1	1	0.970648	0.896246	1.01427	0.936519	0.95442	0.119077
A6N6J5	WD repeat-containing protein 35 OS=Rattus norvegicus GN=Wdr35 PE=1 SV=1	3	3	0.9875	0.997917	0.963415	0.973577	0.980602	0.0432469
Q6DGF4	AN1-type zinc finger protein 6 OS=Rattus norvegicus GN=Zfand6 PE=1 SV=1	2	2	0.998596	0.976826	0.930628	0.91034	0.954097	0.0647866
D3ZG74	Fras1-related extracellular matrix protein 2 OS=Rattus norvegicus GN=Frem2 PE=4 SV=2	1	1	1.01065	1.05682	1.02154	1.0682	1.0393	0.0290908
P08721	Osteopontin OS=Rattus norvegicus GN=Spp1 PE=1 SV=2	2	2	1.3055	1.45413	1.00994	1.12491	1.22362	0.0626377
D3ZDU5	Profilin OS=Rattus norvegicus GN=Pfn2 PE=3 SV=1	1	1	0.939354	0.940672	0.99096	0.99235	0.965834	0.0618563
D4AEG7	TBC1 domain family, member 13 OS=Rattus norvegicus GN=Tbc1d13 PE=1 SV=3	1	1	0.99096	0.893602	0.753968	0.679894	0.829606	0.0501066
G3V6Q6	Guanine nucleotide binding protein, alpha 11 OS=Rattus norvegicus GN=Gna11 PE=1 SV=1	4	1	0.929175	0.983756	0.929175	0.983756	0.956465	0.0327225
A0A0G2K7G7	Septin-8 OS=Rattus norvegicus GN=Sept8 PE=1 SV=1	5	3	1.03991	1.01089	1.05368	1.02426	1.03218	0.0134587
D4A9T2	Twisted gastrulation BMP-signaling modulator 1 OS=Rattus norvegicus GN=Twsg1 PE=4 SV=1	1	1	1.01703	0.993612	1.05368	1.02941	1.02343	0.110392
A0A0G2JVB0	Solute carrier family 2, facilitated glucose transporter member 3-like OS=Rattus norvegicus GN=Slc2a3 PE=1 SV=1	2	2	0.939056	1.05701	0.959812	1.08038	1.00906	0.804386
B0BN55	Uroporphyrinogen decarboxylase OS=Rattus norvegicus GN=Urod PE=1 SV=1	2	2	0.966959	0.96089	1.0007	0.994417	0.980741	0.0989221
P05714	Ras-related protein Rab-4A OS=Rattus norvegicus GN=Rab4a PE=1 SV=3	3	1	0.876528	1.0923	0.906448	1.12958	1.00121	0.985501
A0A0G2JV28	Male-enhanced antigen 1 OS=Rattus norvegicus GN=Mea1 PE=1 SV=1	1	1	1.14161	1.08751	1.0536	1.00367	1.0716	0.0485381
Q66H39	ATP-binding cassette sub-family F member 3 OS=Rattus norvegicus GN=Abcf3 PE=2 SV=1	4	4	0.969615	0.966914	0.957972	0.955304	0.962451	3.53554e-05
A0A0G2K9K2	Transforming, acidic coiled-coil-containing protein 1 OS=Rattus norvegicus GN=Tacc1 PE=1 SV=1	3	2	1.03302	1.07538	0.917145	0.954748	0.995073	0.895737
D4AE96	Importin 7 OS=Rattus norvegicus GN=Ipo7 PE=1 SV=1	5	5	0.942521	0.992162	1.06181	1.11773	1.02856	0.486234
G3V6G5	Transducin (Beta)-like 1 X-linked (Predicted) OS=Rattus norvegicus GN=Tbl1x PE=1 SV=1	2	1	0.935233	0.970207	0.996549	1.03382	0.983952	0.470311
A0A1W2Q678	Family with sequence similarity 120C OS=Rattus norvegicus GN=FAM120C PE=1 SV=1	3	3	0.836616	1.00869	0.942559	1.13642	0.981072	0.773101
F1M9Q8	Alkylglycerone-phosphate synthase OS=Rattus norvegicus GN=Agps PE=1 SV=3	2	2	1.07435	1.2	1.05321	1.17638	1.12599	0.0135951
D4A830	Pyrophosphatase (inorganic) 2 OS=Rattus norvegicus GN=Ppa2 PE=1 SV=2	5	5	0.900374	1.04359	0.817873	0.947964	0.927449	0.174596
G3V949	CAP-Gly domain-containing linker protein 2 OS=Rattus norvegicus GN=Clip2 PE=1 SV=1	10	8	0.976463	1.02824	0.790419	0.832335	0.906865	0.152075
Q1JU70	ZH3 protein OS=Rattus norvegicus GN=Ythdf2 PE=2 SV=1	1	1	1.01466	0.981145	1.08839	1.05243	1.03416	0.191541
Q7TPI7	Ac2-269 OS=Rattus norvegicus GN=LOC100911453 PE=1 SV=1	1	1	0.832188	1.09622	0.879008	1.15789	0.991328	0.917149
A0A0H2UI10	Protein O-GlcNAcase OS=Rattus norvegicus GN=Mgea5 PE=1 SV=1	7	7	0.943116	0.999354	0.929892	0.985341	0.964425	0.0757429
G3V946	AIP1, isoform CRA_a OS=Rattus norvegicus GN=Dpy30 PE=1 SV=1	1	1	1.04057	1.02705	0.937781	0.925593	0.982747	0.582618
M0RCX0	Pterin-4 alpha-carbinolamine dehydratase 2 OS=Rattus norvegicus GN=Pcbd2 PE=1 SV=1	2	2	1.0048	0.929993	1.07018	0.990497	0.998868	0.96988
D4A259	Polymerase (RNA) II (DNA directed) polypeptide D (Predicted) OS=Rattus norvegicus GN=Polr2d PE=1 SV=1	4	4	0.830499	1.03061	0.868921	1.07829	0.952081	0.457863
B5DEF6	RGD1310159 protein OS=Rattus norvegicus GN=Acad10 PE=2 SV=1	3	3	0.966381	0.933421	1.00274	0.968536	0.967769	0.0630809
B2GV38	Ubiquitin-like protein 4A OS=Rattus norvegicus GN=Ubl4a PE=2 SV=1	5	5	0.883483	1.08769	1.03083	1.2691	1.06778	0.427824
Q4KLI0	SWI/SNF related, matrix associated, actin dependent regulator of chromatin, subfamily b, member 1 OS=Rattus norvegicus GN=Smarcb1 PE=1 SV=1	2	2	1.02867	0.996503	1.02509	0.993031	1.01082	0.289893
F1LT09	WD repeat domain 33 OS=Rattus norvegicus GN=Wdr33 PE=1 SV=2	1	1	0.866824	0.85386	0.859229	0.846379	0.856573	4.93375e-08
D3ZF12	Signal peptidase complex subunit 3 OS=Rattus norvegicus GN=Spcs3 PE=1 SV=1	2	2	1.12797	1.11111	0.992583	0.977748	1.05235	0.22867
Q6MG13	DEAD/H (Asp-Glu-Ala-Asp/His) box polypeptide 16 OS=Rattus norvegicus GN=Dhx16 PE=1 SV=1	1	1	1.00204	0.967369	0.912693	0.881115	0.940804	0.0715767
D4A9M7	Autophagy-related 16-like 2 OS=Rattus norvegicus GN=Atg16l2 PE=1 SV=1	1	1	1.15868	1.82875	1.44608	2.28235	1.67897	0.0316409
Q5BJQ6	Cleavage stimulation factor subunit 1 OS=Rattus norvegicus GN=Cstf1 PE=2 SV=1	1	1	1.01865	0.968923	1.06498	1.013	1.01639	0.436133
F1LMH0	Neuronal-specific septin-3 OS=Rattus norvegicus GN=Sept3 PE=3 SV=1	3	3	0.948553	0.97299	0.974884	1	0.974107	0.0488627
B5DFI3	AP complex subunit sigma OS=Rattus norvegicus GN=Ap1s1 PE=1 SV=1	3	2	1.15765	1.13725	1.07267	1.05378	1.10534	0.00556656
D3ZUZ4	FAM20B, glycosaminoglycan xylosylkinase OS=Rattus norvegicus GN=Fam20b PE=1 SV=1	2	2	1.27453	1.29776	0.823693	0.83871	1.05867	0.671005
A0A0G2K4F6	Serine and arginine repetitive matrix 1 OS=Rattus norvegicus GN=Srrm1 PE=1 SV=1	4	4	1.0616	0.909742	1.12188	0.961393	1.01365	0.785213
M0RDM7	GPI ethanolamine phosphate transferase 2-like OS=Rattus norvegicus GN=LOC100910143 PE=4 SV=2	2	2	0.953698	1.01093	0.999326	1.0593	1.00581	0.797635
P08753	Guanine nucleotide-binding protein G(k) subunit alpha OS=Rattus norvegicus GN=Gnai3 PE=1 SV=3	6	2	0.938014	1.04238	0.952473	1.05845	0.997828	0.94585
D3Z863	CWF19-like 1, cell cycle control (S. pombe) OS=Rattus norvegicus GN=Cwf19l1 PE=1 SV=1	1	1	1.05777	1.01569	0.937421	0.900126	0.977753	0.558617
M0R7R2	Similar to Protein C6orf203 OS=Rattus norvegicus GN=LOC683897 PE=1 SV=1	2	2	0.977587	1.02373	0.893373	0.935542	0.957559	0.179893
D4A208	SLIT-ROBO Rho GTPase-activating protein 2 OS=Rattus norvegicus GN=Srgap2 PE=1 SV=1	1	1	0.989987	1.07076	0.875443	0.946871	0.970765	0.501105
G3V6D9	Na(+)/H(+) exchange regulatory cofactor NHE-RF OS=Rattus norvegicus GN=Slc9a3r2 PE=1 SV=1	4	4	0.915998	0.982705	0.84937	0.911226	0.914825	0.0204164
F1LQQ7	Sodium channel protein OS=Rattus norvegicus GN=Scn7a PE=1 SV=3	1	1	0.889688	0.903477	0.88019	0.893832	0.891797	5.16469e-07
Q5PPG2	Legumain OS=Rattus norvegicus GN=Lgmn PE=1 SV=1	1	1	1.11527	1.07186	1.08998	1.04755	1.08116	0.00129317
D3ZML4	Similar to RIKEN cDNA 5730502D15 gene (Predicted) OS=Rattus norvegicus GN=Trabd PE=1 SV=1	2	2	0.994012	1.10579	0.981603	1.09198	1.04335	0.228002
D3ZC89	Family with sequence similarity 114, member A2 OS=Rattus norvegicus GN=Fam114a2 PE=1 SV=3	2	2	0.952896	1.06111	0.867826	0.966377	0.962052	0.374627
Q63016	Large neutral amino acids transporter small subunit 1 OS=Rattus norvegicus GN=Slc7a5 PE=1 SV=2	2	2	1.09824	1.02493	1.09985	1.02643	1.06236	0.0258184
O35394	Prenylated Rab acceptor protein 1 OS=Rattus norvegicus GN=Rabac1 PE=1 SV=1	3	3	1.16034	1.01782	1.07076	0.939242	1.04704	0.350131
Q63470	Dual specificity tyrosine-phosphorylation-regulated kinase 1A OS=Rattus norvegicus GN=Dyrk1a PE=1 SV=2	1	1	0.889549	0.974466	0.938596	1.0282	0.957702	0.198165
B2RYV2	Nudt16 protein OS=Rattus norvegicus GN=Nudt16 PE=2 SV=1	2	2	1.15753	1.1444	0.971484	0.960467	1.05847	0.316499
G3V7I5	Aldehyde dehydrogenase X, mitochondrial OS=Rattus norvegicus GN=Aldh1b1 PE=1 SV=1	4	2	0.924738	0.968538	0.931635	0.975761	0.950168	0.00820081
D4AE88	Family with sequence similarity 120B OS=Rattus norvegicus GN=Fam120b PE=1 SV=1	1	1	1.06955	0.976579	1.07183	0.978663	1.02416	0.403349
P20762	Ig gamma-2C chain C region OS=Rattus norvegicus PE=2 SV=1	2	2	1.04216	0.931583	0.850056	0.759865	0.895915	0.13374
D3ZJX5	RCG54610, isoform CRA_a OS=Rattus norvegicus GN=Timm50 PE=1 SV=2	2	2	1.01139	1.02143	0.984355	0.994133	1.00283	0.746427
Q5XIK2	Thioredoxin-related transmembrane protein 2 OS=Rattus norvegicus GN=Tmx2 PE=2 SV=1	1	1	1.05146	0.997218	1.14286	1.0839	1.06886	0.0645215
G3V9G5	RCG24674, isoform CRA_b OS=Rattus norvegicus GN=Synm PE=1 SV=2	2	2	0.945103	0.882096	1.05722	0.986741	0.967791	0.414616
Q5PQL7	Integral membrane protein 2C OS=Rattus norvegicus GN=Itm2c PE=1 SV=1	3	3	1.05062	1.19209	0.916515	1.03993	1.04979	0.410959
Q9Z272	ARF GTPase-activating protein GIT1 OS=Rattus norvegicus GN=Git1 PE=1 SV=1	1	1	0.957098	1.02397	1.02362	1.09514	1.02496	0.409988
F7FHF3	Serpin family F member 2 OS=Rattus norvegicus GN=Serpinf2 PE=1 SV=1	1	1	1.02146	1.00067	0.948319	0.929016	0.974867	0.290537
D4AEL2	Golgi membrane protein 1 OS=Rattus norvegicus GN=Golm1 PE=1 SV=2	3	3	0.808386	1.11093	0.909254	1.24955	1.01953	0.850362
Q9WTY2	GTP-binding protein REM 2 OS=Rattus norvegicus GN=Rem2 PE=1 SV=2	3	3	1.04022	0.947512	1.1491	1.04669	1.04588	0.30801
A0A0G2JVX7	Apolipoprotein A-IV OS=Rattus norvegicus GN=Apoa4 PE=1 SV=1	3	3	1.10982	1.04	1.03951	0.974114	1.04086	0.19074
B2GV35	Galactosylgalactosylxylosylprotein 3-beta-glucuronosyltransferase OS=Rattus norvegicus GN=B3gat3 PE=1 SV=1	1	1	1.11297	1.23761	0.899293	1	1.06247	0.424323
F1M062	La ribonucleoprotein domain family, member 1 OS=Rattus norvegicus GN=Larp1 PE=1 SV=3	2	2	0.884326	1.05437	0.922195	1.09952	0.990101	0.85409
A0A0G2JSQ0	Serine/threonine-protein phosphatase 2A 55 kDa regulatory subunit B OS=Rattus norvegicus GN=Ppp2r2d PE=1 SV=1	3	1	1.1039	1.12843	0.983923	1.00579	1.05551	0.170516
Q5XIA6	Sphingomyelin phosphodiesterase OS=Rattus norvegicus GN=Smpd1 PE=1 SV=1	2	2	0.873858	0.9121	0.965931	1.0082	0.940023	0.0886854
D3ZYQ9	Ring finger protein 20 OS=Rattus norvegicus GN=Rnf20 PE=1 SV=1	3	2	0.994156	1.14286	0.938688	1.07909	1.0387	0.424333
Q06C60	BolA family member 1 OS=Rattus norvegicus GN=Bola1 PE=1 SV=1	1	1	0.881677	0.937967	0.897136	0.954413	0.917798	0.002917
F1MA52	Nuclear RNA export factor 1 OS=Rattus norvegicus GN=Nxf1 PE=1 SV=1	3	3	0.992248	1.17571	0.908876	1.07692	1.03844	0.5265
Q4FZS2	BUB3 mitotic checkpoint protein OS=Rattus norvegicus GN=Bub3 PE=1 SV=1	3	3	0.813757	0.965079	0.834509	0.989691	0.900759	0.0683019
P54001	Prolyl 4-hydroxylase subunit alpha-1 OS=Rattus norvegicus GN=P4ha1 PE=2 SV=2	3	3	1.02597	0.926099	1.1015	0.994282	1.01196	0.753604
Q07984	Translocon-associated protein subunit delta OS=Rattus norvegicus GN=Ssr4 PE=2 SV=1	1	1	0.866704	1.00112	0.913998	1.05575	0.959395	0.376301
B2RYS9	Similar to RIKEN cDNA 0610038D11 (Predicted), isoform CRA_b OS=Rattus norvegicus GN=Trmt112 PE=1 SV=1	2	2	0.988462	1.05513	1.02527	1.09441	1.04082	0.119231
B1WC84	Canopy 4 homolog (Zebrafish) OS=Rattus norvegicus GN=Cnpy4 PE=1 SV=1	3	3	1.06759	1.0931	1.0502	1.07531	1.07155	0.000197727
D3ZDU2	Regulatory-associated protein of MTOR, complex 1 OS=Rattus norvegicus GN=Rptor PE=1 SV=2	1	1	1.01309	1.07592	0.957328	1.0167	1.01576	0.539446
Q7TP35	ATPase family AAA domain-containing protein 1 OS=Rattus norvegicus GN=Atad1 PE=1 SV=1	3	2	1.02785	1.01923	1.07192	1.06293	1.04548	0.0125178
B2RYW9	Fumarylacetoacetate hydrolase domain-containing protein 2 OS=Rattus norvegicus GN=Fahd2 PE=1 SV=1	5	5	0.891954	0.935632	0.999356	1.04829	0.968809	0.400408
D3ZYS7	G3BP stress granule assembly factor 1 OS=Rattus norvegicus GN=G3bp1 PE=1 SV=1	5	4	1.03179	1.13907	1.00581	1.11039	1.07177	0.0634738
Q4KLL7	Vacuolar protein sorting 4 homolog B OS=Rattus norvegicus GN=Vps4b PE=1 SV=1	3	1	0.869008	0.896321	1.00322	1.03475	0.950824	0.26775
Q6MG75	Negative elongation factor complex member E OS=Rattus norvegicus GN=Nelfe PE=1 SV=1	2	2	1.10169	0.970339	1.08863	0.958828	1.02987	0.460158
D4A644	MAP7 domain-containing 1 OS=Rattus norvegicus GN=Map7d1 PE=1 SV=1	4	4	0.939193	0.989765	0.957643	1.00921	0.973952	0.148703
D3ZV52	Intersectin-1 OS=Rattus norvegicus GN=Itsn1 PE=1 SV=3	2	2	0.918187	1.03943	0.914956	1.03578	0.977089	0.536473
D3ZI68	PRP31 pre-mRNA processing factor 31 homolog (Yeast) (Predicted) OS=Rattus norvegicus GN=Prpf31 PE=1 SV=1	2	2	1.01101	0.941062	1.0097	0.939845	0.975405	0.26872
F1LRV6	GMP reductase OS=Rattus norvegicus GN=Gmpr PE=3 SV=1	3	3	0.933612	1	1.00193	1.07317	1.00218	0.941588
D3ZJA3	RCG49355 OS=Rattus norvegicus GN=Spry4 PE=1 SV=1	1	1	0.769798	0.780128	0.8887	0.900625	0.834813	0.00312667
A0A0G2K161	Erythrocyte membrane protein band 4.1 OS=Rattus norvegicus GN=Epb41 PE=1 SV=1	3	2	1.01688	1.03247	1.03984	1.05578	1.03624	0.00417006
A0A0G2QC17	Protein phosphatase 2C, magnesium dependent, catalytic subunit, isoform CRA_a OS=Rattus norvegicus GN=Pdp1 PE=1 SV=1	2	2	0.991145	1.05946	0.999362	1.06824	1.02955	0.189108
F1LQ83	TMEM9 domain family, member B OS=Rattus norvegicus GN=Tmem9b PE=1 SV=2	1	1	1.0336	1.15744	1.05161	1.17761	1.10507	0.0280632
Q5RJR2	Twinfilin-1 OS=Rattus norvegicus GN=Twf1 PE=1 SV=1	6	6	1.10471	1.05903	0.998729	0.957433	1.02998	0.391817
P24135	1-phosphatidylinositol 4,5-bisphosphate phosphodiesterase gamma-2 OS=Rattus norvegicus GN=Plcg2 PE=1 SV=1	2	2	0.98374	1.02627	0.935753	0.976205	0.980491	0.333253
D3ZTB5	S100 calcium-binding protein A13 OS=Rattus norvegicus GN=S100a13 PE=1 SV=2	3	3	1.12171	1.11103	1.04787	1.0379	1.07963	0.0098856
B5DEZ6	Glucosamine-6-phosphate isomerase OS=Rattus norvegicus GN=Gnpda2 PE=1 SV=1	3	3	0.899829	1.03699	0.935503	1.07811	0.987608	0.777302
Q6JAM9	Transmembrane protein 35A OS=Rattus norvegicus GN=Tmem35a PE=1 SV=1	1	1	1.2038	0.906464	1.28595	0.968318	1.09113	0.356299
M0R6T1	TatD DNase domain-containing 1 OS=Rattus norvegicus GN=Tatdn1 PE=1 SV=2	1	1	1.04765	0.989411	1.04145	0.983553	1.01552	0.392748
Q4KLZ3	DAZ associated protein 1, isoform CRA_a OS=Rattus norvegicus GN=Dazap1 PE=1 SV=1	2	2	0.993723	1.02009	0.994972	1.02137	1.00754	0.361008
A0A0G2K4H7	Keratin 78 OS=Rattus norvegicus GN=Krt78 PE=3 SV=1	2	1	1.01406	1.07668	1.02321	1.0864	1.05009	0.0342902
D3ZW15	SEC24 homolog B, COPII coat complex component OS=Rattus norvegicus GN=Sec24b PE=1 SV=1	5	5	0.914319	1.0161	1.00952	1.1219	1.01546	0.728
D4AE56	Prostaglandin E synthase 2 OS=Rattus norvegicus GN=Ptges2 PE=1 SV=1	1	1	0.909611	0.889016	0.845295	0.826156	0.86752	0.00046201
Q64350	Translation initiation factor eIF-2B subunit epsilon OS=Rattus norvegicus GN=Eif2b5 PE=1 SV=2	3	3	0.989428	1.09764	1.04191	1.15586	1.07121	0.0940962
G3V667	Integrin subunit alpha 6 OS=Rattus norvegicus GN=Itga6 PE=1 SV=1	2	2	0.945368	0.890736	0.936471	0.882353	0.913732	0.00162086
Q53AQ4	Transmembrane and ubiquitin-like domain-containing protein 1 OS=Rattus norvegicus GN=Tmub1 PE=1 SV=1	1	1	0.875206	1.06707	0.897407	1.09414	0.983455	0.779675
Q792I0	Protein lin-7 homolog C OS=Rattus norvegicus GN=Lin7c PE=1 SV=1	3	3	0.967233	0.868932	1.15759	1.03994	1.00842	0.894383
A0A0G2K8L9	Mitochondrial ribosomal protein S28 OS=Rattus norvegicus GN=Mrps28 PE=1 SV=1	1	1	1.04868	1.06513	1.0095	1.02533	1.03716	0.0234762
F1M1B3	Similar to Hypothetical protein MGC31278 OS=Rattus norvegicus GN=Washc5 PE=1 SV=2	3	3	1.01142	0.990482	0.954491	0.934731	0.972781	0.166568
O54701	Sodium/potassium/calcium exchanger 2 OS=Rattus norvegicus GN=Slc24a2 PE=1 SV=1	1	1	1.21217	1.33536	0.951642	1.04836	1.13688	0.159476
F7FHF7	Mitofusin-2-like OS=Rattus norvegicus GN=Mfn2 PE=1 SV=1	5	5	1.1304	1.02197	1.04248	0.942484	1.03434	0.408041
D4A719	Sorting nexin 12 OS=Rattus norvegicus GN=Snx12 PE=1 SV=1	1	1	0.985185	0.895062	1.10373	1.00277	0.996687	0.94078
G3V640	Mitochondrial import inner membrane translocase subunit TIM44 OS=Rattus norvegicus GN=Timm44 PE=1 SV=1	5	5	0.9975	0.9725	0.920946	0.897865	0.947203	0.0606442
A0A0G2K376	Pre-mRNA 3'-end-processing factor FIP1 OS=Rattus norvegicus GN=Fip1l1 PE=1 SV=1	4	4	1.00314	1.07789	1.02437	1.10071	1.05153	0.0638099
M0R3W3	Transforming growth factor beta receptor 3-like OS=Rattus norvegicus GN=Tgfbr3l PE=4 SV=2	2	2	0.992542	1.20758	0.915186	1.11347	1.05719	0.410264
B5DFJ4	VPS18 CORVET/HOPS core subunit OS=Rattus norvegicus GN=Vps18 PE=1 SV=1	2	2	0.963319	0.991581	0.839183	0.863803	0.914472	0.0609492
B3DMA2	Acyl-CoA dehydrogenase family member 11 OS=Rattus norvegicus GN=Acad11 PE=1 SV=1	3	3	0.962763	1	0.964501	1.00181	0.982267	0.150801
Q8VI04	Isoaspartyl peptidase/L-asparaginase OS=Rattus norvegicus GN=Asrgl1 PE=1 SV=1	4	4	0.872757	0.891245	1.00564	1.02694	0.949146	0.242082
O70352	CD82 antigen OS=Rattus norvegicus GN=Cd82 PE=1 SV=1	1	1	1.02292	1.12412	0.940867	1.03396	1.03047	0.447499
A0A0G2JUU7	Gamma-tubulin complex component OS=Rattus norvegicus GN=Tubgcp3 PE=1 SV=1	3	3	0.990142	1.08133	0.914107	0.998294	0.995968	0.909978
B2RYD5	Dtx2 protein OS=Rattus norvegicus GN=Dtx2 PE=2 SV=1	1	1	1.02224	1.04384	1.00124	1.0224	1.02243	0.0417811
F1LZX5	HECT domain E3 ubiquitin protein ligase 4 OS=Rattus norvegicus GN=Hectd4 PE=1 SV=3	4	4	0.986511	1.13059	0.968694	1.11017	1.04899	0.283364
G3V7N0	Heparan sulfate 2-O-sulfotransferase 1 OS=Rattus norvegicus GN=Hs2st1 PE=1 SV=1	1	1	1.28594	1.21086	1.16329	1.09538	1.18887	0.00329452
A0A0G2JTA1	Serine/threonine-protein phosphatase 2A 56 kDa regulatory subunit OS=Rattus norvegicus GN=Ppp2r5e PE=1 SV=1	2	2	1.10707	1.04667	1.03663	0.980077	1.04261	0.152456
F8WFM2	Beta-soluble NSF attachment protein OS=Rattus norvegicus GN=Napb PE=4 SV=1	2	1	0.899666	1.01059	0.955595	1.07342	0.984817	0.69744
B1WBV6	Aplp1 protein OS=Rattus norvegicus GN=Aplp1 PE=2 SV=1	5	5	1.10905	1.12003	1.05479	1.06523	1.08728	0.00160128
Q99NI1	Nucleoside diphosphate kinase OS=Rattus norvegicus GN=Nme3 PE=2 SV=1	5	1	1.22113	0.768302	0.848898	0.534103	0.843109	0.313407
B4F779	Adaptor protein, phosphotyrosine interaction, PH domain and leucine zipper containing 2 OS=Rattus norvegicus GN=Appl2 PE=1 SV=1	1	1	1.20461	1.16518	1.21455	1.17479	1.18978	3.62479e-06
A0A0A0MXX5	3-hydroxybutyrate dehydrogenase type 2 OS=Rattus norvegicus GN=Bdh2 PE=1 SV=1	2	2	1.03109	0.975254	1.03967	0.983365	1.00734	0.669324
F1LSA8	Echinoderm microtubule-associated protein-like 5 OS=Rattus norvegicus GN=Eml5 PE=4 SV=3	1	1	1.10319	1.11948	0.946418	0.960396	1.03237	0.506194
Q6AYK3	Inositol-3-phosphate synthase 1 OS=Rattus norvegicus GN=Isyna1 PE=3 SV=2	5	5	0.996326	0.95101	1.10007	1.05003	1.02436	0.479921
M0RDG7	Cytokine receptor-like factor 3 OS=Rattus norvegicus GN=Crlf3 PE=1 SV=2	1	1	1.01182	0.972637	0.835645	0.803287	0.905846	0.114047
D3ZC01	RB-binding protein 5, histone lysine methyltransferase complex subunit OS=Rattus norvegicus GN=Rbbp5 PE=1 SV=1	3	3	1.10142	1.12847	0.966766	0.990504	1.04679	0.286781
Q32KJ5	N-acetylglucosamine-6-sulfatase OS=Rattus norvegicus GN=Gns PE=1 SV=1	3	3	0.997551	1.16779	0.957672	1.12111	1.06103	0.266011
D4A7U1	Zyxin OS=Rattus norvegicus GN=Zyx PE=1 SV=1	1	1	1.11567	0.952088	1.07733	0.919365	1.01611	0.74618
Q7TPJ1	Ac2-233 OS=Rattus norvegicus GN=Igtp PE=2 SV=1	4	4	0.926788	0.9563	0.848753	0.87578	0.901905	0.00682664
A0A0G2K9Q1	Golgi phosphoprotein 3-like OS=Rattus norvegicus GN=Golph3l PE=1 SV=1	1	1	1.01176	0.963467	1.07429	1.02301	1.01813	0.455624
Q5EIC4	Interferon regulatory factor 2-binding protein-like OS=Rattus norvegicus GN=Irf2bpl PE=1 SV=1	2	2	0.906822	0.971159	0.881402	0.943935	0.92583	0.00961428
P16303	Carboxylesterase 1D OS=Rattus norvegicus GN=Ces1d PE=1 SV=2	3	1	0.908333	0.960556	0.84715	0.895855	0.902974	0.0059094
F1LSU6	Cytohesin-2 OS=Rattus norvegicus GN=Cyth2 PE=4 SV=1	2	2	0.950058	1.05807	0.969769	1.08002	1.01448	0.667514
O08719	Ena/VASP-like protein OS=Rattus norvegicus GN=Evl PE=1 SV=2	2	2	1.00738	0.98647	1.03279	1.01135	1.0095	0.355581
Q6AYQ4	Transmembrane protein 109 OS=Rattus norvegicus GN=Tmem109 PE=2 SV=1	1	1	1.03605	1.12966	0.972107	1.05994	1.04944	0.179464
Q9WU74	Lipolysis-stimulated lipoprotein receptor OS=Rattus norvegicus GN=Lsr PE=1 SV=1	3	3	0.793037	0.94971	0.775414	0.928605	0.861691	0.0219884
Q3MIE0	Enoyl-CoA hydratase domain-containing protein 3, mitochondrial OS=Rattus norvegicus GN=Echdc3 PE=2 SV=1	1	1	0.998783	0.905109	1.15715	1.04863	1.02742	0.620135
D4A8N1	Dolichyl-phosphate mannosyltransferase subunit 1, catalytic OS=Rattus norvegicus GN=Dpm1 PE=1 SV=1	3	3	0.927724	0.872388	1.07106	1.00717	0.969585	0.512407
D3ZLP9	Sin3A-associated protein 130 OS=Rattus norvegicus GN=Sap130 PE=1 SV=3	1	1	0.960819	1.01287	0.836984	0.882323	0.923248	0.0988325
G3V614	KIF1-binding protein OS=Rattus norvegicus GN=Kif1bp PE=1 SV=1	2	2	1.0586	1.08693	1.04847	1.07653	1.06763	0.000232821
A0A0G2K1C0	Actin-related protein 3 OS=Rattus norvegicus GN=Actr3 PE=1 SV=1	4	4	0.901039	0.963368	0.931073	0.99548	0.94774	0.0426331
D3ZHK4	RB1-inducible coiled-coil 1 OS=Rattus norvegicus GN=Rb1cc1 PE=1 SV=1	1	1	0.7946	0.927676	0.834008	0.973684	0.882492	0.0292713
Q5FVL2	ER membrane protein complex subunit 8 OS=Rattus norvegicus GN=Emc8 PE=2 SV=1	3	3	1.06525	1.13437	1.00918	1.07466	1.07086	0.0326485
P42893-2	Isoform B of Endothelin-converting enzyme 1 OS=Rattus norvegicus GN=Ece1	4	4	1.01166	0.947853	0.985655	0.923491	0.967164	0.144593
P11884	Aldehyde dehydrogenase, mitochondrial OS=Rattus norvegicus GN=Aldh2 PE=1 SV=1	11	1	1.02166	0.825495	1.02994	0.83219	0.927322	0.248685
Q5U2U3	Poly [ADP-ribose] polymerase OS=Rattus norvegicus GN=Parp3 PE=1 SV=1	3	3	1.01914	1.07963	0.978081	1.03614	1.02825	0.227612
F1LQZ9	Microtubule-associated protein 6 OS=Rattus norvegicus GN=Map6 PE=1 SV=3	2	2	1.01974	1.09315	1.05421	1.1301	1.0743	0.0208503
B5DEJ9	LOC691036 protein OS=Rattus norvegicus GN=Sbf2 PE=2 SV=1	1	1	1.01722	0.943419	1.01722	0.943419	0.98032	0.391247
F1M8A5	Huntingtin-interacting protein K OS=Rattus norvegicus GN=Hypk PE=1 SV=1	3	3	1.02475	1.15903	1.00853	1.14068	1.08325	0.075454
D3ZYM7	LYR motif-containing 4 OS=Rattus norvegicus GN=Lyrm4 PE=1 SV=1	1	1	0.968421	0.974854	0.914412	0.920486	0.944543	0.0124914
F1M6Q2	Ciliary rootlet coiled-coil, rootletin OS=Rattus norvegicus GN=Crocc PE=1 SV=2	4	3	0.815362	0.867061	0.861602	0.916233	0.865065	0.000609641
Q91ZN1	Coronin-1A OS=Rattus norvegicus GN=Coro1a PE=1 SV=3	3	3	0.989267	1.14073	1.00606	1.1601	1.07404	0.146481
D3ZFF4	Lysocardiolipin acyltransferase 1 OS=Rattus norvegicus GN=Lclat1 PE=1 SV=1	2	2	1.18741	1.05079	1.08426	0.959504	1.07049	0.184748
A0A0G2JSS1	Integrin-linked kinase-associated serine/threonine phosphatase 2C OS=Rattus norvegicus GN=Ilkap PE=1 SV=1	3	3	0.892473	0.854839	0.873684	0.836842	0.86446	2.86734e-05
Q5U3Z7	Serine hydroxymethyltransferase OS=Rattus norvegicus GN=Shmt2 PE=1 SV=1	5	5	0.939548	0.974576	1.01217	1.04991	0.994051	0.810987
P86182	Coiled-coil domain-containing protein 22 OS=Rattus norvegicus GN=Ccdc22 PE=1 SV=2	9	9	0.848037	0.867925	0.89698	0.918015	0.882739	0.000273876
B1WBQ5	Serine/threonine kinase 3 (STE20 homolog, yeast) OS=Rattus norvegicus GN=Stk3 PE=1 SV=1	3	2	0.984033	1.12419	0.914788	1.04508	1.01702	0.715536
Q4QQT3	CUGBP Elav-like family member 1 OS=Rattus norvegicus GN=Celf1 PE=2 SV=1	3	3	0.940147	0.945229	0.981722	0.987028	0.963531	0.0237868
D3ZGY2	OTU domain-containing 6B OS=Rattus norvegicus GN=Otud6b PE=1 SV=3	1	1	0.960253	1.00115	0.991672	1.03391	0.996746	0.837173
Q0D2L2	Mitochondrial ribosomal protein S22 OS=Rattus norvegicus GN=Mrps22 PE=1 SV=1	2	2	1.03915	1.06774	1.06226	1.09149	1.06516	0.000910175
A0A0G2JZQ9	Keratin, type II cytoskeletal 1b OS=Rattus norvegicus GN=Krt77 PE=3 SV=1	4	2	1.04435	1.11868	0.649068	0.695264	0.876839	0.342493
A0A0G2K717	CCR4-NOT transcription complex, subunit 2 OS=Rattus norvegicus GN=Cnot2 PE=1 SV=1	2	2	1.15608	1.10221	1.0814	1.03101	1.09267	0.0116422
Q5RKI5	FLII, actin-remodeling protein OS=Rattus norvegicus GN=Flii PE=1 SV=1	2	2	0.874804	0.984351	0.907468	1.0211	0.946932	0.166823
Q5BK85	Transmembrane emp24 domain-containing protein 1 OS=Rattus norvegicus GN=Tmed1 PE=2 SV=1	1	1	1.15743	1.06913	1.03488	0.955936	1.05434	0.240679
D4AD82	Rho GTPase-activating protein 35 OS=Rattus norvegicus GN=Arhgap35 PE=1 SV=3	1	1	1.01318	1.06531	0.937881	0.986134	1.00063	0.981973
Q6AYG3	Exopolyphosphatase PRUNE1 OS=Rattus norvegicus GN=Prune1 PE=1 SV=1	5	5	0.965812	1.05413	0.986038	1.07621	1.02055	0.467213
P02625	Parvalbumin alpha OS=Rattus norvegicus GN=Pvalb PE=1 SV=2	2	2	1.05725	1.3883	1.05006	1.37886	1.21862	0.0615483
A0A0H2UHK2	Membrane-associated progesterone receptor component 1 OS=Rattus norvegicus GN=Pgrmc1 PE=1 SV=1	2	1	1.08557	1.02427	1.08488	1.02361	1.05458	0.021524
G3V616	Divalent cation tolerant protein CUTA, isoform CRA_b OS=Rattus norvegicus GN=Cuta PE=1 SV=1	2	2	1.02776	1.06035	1.11892	1.1544	1.09036	0.0192649
G3V781	MRE11 homolog A, double strand break repair nuclease OS=Rattus norvegicus GN=Mre11a PE=1 SV=1	2	2	0.875193	1.18233	0.886115	1.19709	1.03518	0.707206
P0DN35	NADH dehydrogenase [ubiquinone] 1 beta subcomplex subunit 1 OS=Rattus norvegicus GN=Ndufb1 PE=3 SV=1	1	1	1.06363	0.871491	1.0798	0.884737	0.974914	0.670174
Q08602	Geranylgeranyl transferase type-2 subunit alpha OS=Rattus norvegicus GN=Rabggta PE=1 SV=1	6	6	0.849527	0.963129	0.894544	1.01417	0.930341	0.104298
G3V824	Insulin-like growth factor 2 receptor OS=Rattus norvegicus GN=Igf2r PE=1 SV=1	1	1	1.12229	1.08876	0.932277	0.904424	1.01194	0.834667
Q4V884	CDC16 cell division cycle 16 homolog (S. cerevisiae) OS=Rattus norvegicus GN=Cdc16 PE=1 SV=1	4	4	1.0148	0.960924	0.989036	0.936526	0.975322	0.196307
D4A0U3	Zinc finger protein 638 OS=Rattus norvegicus GN=Zfp638 PE=1 SV=1	5	5	0.9549	1.02227	0.929539	0.995122	0.975458	0.279226
D4A022	GTPase-activating protein and VPS9 domains 1 OS=Rattus norvegicus GN=Gapvd1 PE=1 SV=3	3	3	0.917603	1.02622	0.906928	1.01428	0.966256	0.323033
D4A4U3	Magnesium-dependent phosphatase 1 OS=Rattus norvegicus GN=Mdp1 PE=1 SV=1	2	2	0.768025	1.02508	0.760532	1.01508	0.892178	0.194775
D3ZQL1	ER membrane protein complex subunit 7 OS=Rattus norvegicus GN=Emc7 PE=1 SV=3	1	1	1.1459	1.11526	1.07366	1.04494	1.09494	0.00532601
P19468	Glutamate--cysteine ligase catalytic subunit OS=Rattus norvegicus GN=Gclc PE=1 SV=2	2	2	1.0386	0.911942	1.02439	0.899465	0.968599	0.42288
A0A0G2JSZ1	Ras-related protein Rab-31 OS=Rattus norvegicus GN=Rab31 PE=4 SV=1	1	1	0.960402	1.04294	0.927302	1.007	0.984412	0.562742
Q6P742	Proteolipid protein 2 OS=Rattus norvegicus GN=Plp2 PE=2 SV=1	1	1	0.957754	0.928293	0.963108	0.933482	0.94566	0.000762975
P11497	Acetyl-CoA carboxylase 1 OS=Rattus norvegicus GN=Acaca PE=1 SV=1	4	4	1.11643	1.23739	0.928956	1.0296	1.07809	0.277976
D3ZKT8	HD domain containing 2 (Predicted), isoform CRA_b OS=Rattus norvegicus GN=Hddc2 PE=1 SV=1	2	2	0.861263	0.995027	0.839147	0.969477	0.916229	0.0738191
Q63ZV7	DNA repair protein SWI5 homolog OS=Rattus norvegicus GN=Swi5 PE=3 SV=1	1	1	0.913593	0.933087	0.919406	0.939024	0.926278	1.59784e-05
Q7TP14	Cc1-9 OS=Rattus norvegicus GN=Chid1 PE=1 SV=1	4	4	0.772141	0.916333	0.874496	1.0378	0.900193	0.119311
A0A0G2K167	Regulator of microtubule dynamics protein 1 OS=Rattus norvegicus GN=Rmdn1 PE=1 SV=1	1	1	0.923896	1.03406	0.92735	1.03793	0.980809	0.569202
Q3T1G7	Conserved oligomeric Golgi complex subunit 7 OS=Rattus norvegicus GN=Cog7 PE=2 SV=1	4	4	0.99713	0.964409	1.03025	0.996441	0.997057	0.833957
Q4V8K2	Beta-catenin-like protein 1 OS=Rattus norvegicus GN=Ctnnbl1 PE=1 SV=1	4	4	1	0.956246	0.946594	0.905177	0.952004	0.0486848
B1WBM0	Tetraspanin OS=Rattus norvegicus GN=Cd9 PE=2 SV=1	2	2	0.806871	0.908542	0.951286	1.07115	0.934464	0.276136
Q3KR59	Ubiquitin carboxyl-terminal hydrolase 10 OS=Rattus norvegicus GN=Usp10 PE=1 SV=1	2	2	1.04505	1.08769	1.06098	1.10427	1.07449	0.00135932
B3DMA5	CCR4-NOT transcription complex, subunit 7 OS=Rattus norvegicus GN=Cnot7 PE=1 SV=1	2	2	1.03387	1.05645	0.934479	0.954887	0.99492	0.869656
O08815	STE20-like serine/threonine-protein kinase OS=Rattus norvegicus GN=Slk PE=1 SV=1	7	7	0.909613	0.96186	0.945682	1	0.954289	0.0505752
A0A0G2JTT2	Phosphatidylinositol binding clathrin assembly protein, isoform CRA_a OS=Rattus norvegicus GN=Picalm PE=1 SV=1	4	3	0.947741	1.16821	0.880182	1.08493	1.02027	0.766308
F1LRS8	CD2-associated protein OS=Rattus norvegicus GN=Cd2ap PE=1 SV=2	10	10	1.01337	1.0564	0.974832	1.01622	1.0152	0.396638
Q5BJY8	Mannosidase beta-like OS=Rattus norvegicus GN=Manbal PE=1 SV=1	1	1	1.14304	1.15088	1.06577	1.07308	1.1082	0.00296722
P35426	Cyclin-dependent kinase 4 OS=Rattus norvegicus GN=Cdk4 PE=1 SV=1	2	2	1.09512	1.08824	0.994883	0.98863	1.04172	0.199084
Q99PW9	Huntingtin interacting protein 1 related (Fragment) OS=Rattus norvegicus GN=Hip1r PE=2 SV=1	6	6	0.891947	1.05505	0.896057	1.05991	0.97574	0.625696
A9CMA6	Transmembrane protein 163 OS=Rattus norvegicus GN=Tmem163 PE=1 SV=1	3	3	1.1618	1.15584	0.977133	0.972114	1.06672	0.256402
F7EXQ7	NADH dehydrogenase [ubiquinone] 1 alpha subcomplex subunit 8 OS=Rattus norvegicus GN=Ndufa8 PE=1 SV=1	2	2	1.24326	0.961702	1.17101	0.905812	1.07045	0.418381
Q3B7U9	Peptidyl-prolyl cis-trans isomerase FKBP8 OS=Rattus norvegicus GN=Fkbp8 PE=2 SV=1	4	4	1.02033	0.986063	0.989859	0.95662	0.988217	0.400599
M0R7P0	60S ribosomal protein L27-like OS=Rattus norvegicus GN=LOC100912027 PE=4 SV=1	1	1	1.09396	0.998133	1.01854	0.929316	1.00999	0.778064
Q63768	Adapter molecule crk OS=Rattus norvegicus GN=Crk PE=1 SV=1	2	2	1.00114	1.43441	0.862103	1.23521	1.13321	0.332903
P20673	Argininosuccinate lyase OS=Rattus norvegicus GN=Asl PE=2 SV=1	4	4	0.928947	0.995263	0.974062	1.0436	0.985468	0.563929
Q642E6	Tripeptidyl peptidase I OS=Rattus norvegicus GN=Tpp1 PE=1 SV=1	3	3	1.15264	1.0972	1.03032	0.980758	1.06523	0.133951
P53676	AP-3 complex subunit mu-1 OS=Rattus norvegicus GN=Ap3m1 PE=1 SV=1	4	3	1.11104	1.09661	1.11454	1.10006	1.10556	2.96574e-07
A0A0G2K866	ATP-binding cassette sub-family B member 7, mitochondrial OS=Rattus norvegicus GN=Abcb7 PE=1 SV=1	5	5	1.06111	1.17136	1.05417	1.16369	1.11258	0.0121994
G3V721	WW domain binding protein 2, isoform CRA_b OS=Rattus norvegicus GN=Wbp2 PE=1 SV=1	1	1	0.932667	1.02946	0.942584	1.0404	0.986278	0.644402
Q6AYP7	7-methylguanosine phosphate-specific 5'-nucleotidase OS=Rattus norvegicus GN=Nt5c3b PE=2 SV=2	2	2	1.09304	1.09673	1.19622	1.20027	1.14657	0.00268728
F1M6D0	Mitochondrial ribosomal protein S6 OS=Rattus norvegicus GN=Mrps6 PE=1 SV=2	1	1	1.01083	1.08205	0.938624	1.00476	1.00907	0.767561
D4A7L4	NADH dehydrogenase (Ubiquinone) 1 beta subcomplex, 11 (Predicted) OS=Rattus norvegicus GN=Ndufb11 PE=1 SV=1	1	1	1.01545	1.14016	1.0272	1.15336	1.08404	0.0603119
B2RZB6	LSM8 homolog, U6 small nuclear RNA associated (S. cerevisiae) OS=Rattus norvegicus GN=Lsm8 PE=1 SV=1	5	5	0.974753	1.11416	0.973684	1.11294	1.04388	0.317125
Q3T1L0	Aldehyde dehydrogenase family 16 member A1 OS=Rattus norvegicus GN=Aldh16a1 PE=2 SV=1	5	5	1.01022	1.13061	0.982873	1.1	1.05593	0.164128
A0A0G2K7F5	Disks large homolog 4 OS=Rattus norvegicus GN=Dlg4 PE=1 SV=1	4	3	1.11676	1.12053	0.912308	0.915385	1.01625	0.792729
A0A0G2K290	Uncharacterized protein OS=Rattus norvegicus PE=4 SV=1	1	1	1.25088	1.28391	0.968444	0.994015	1.12431	0.185067
A0A023IKD8	Transporter 1 ATP-binding cassette sub-family B OS=Rattus norvegicus GN=Tap2 PE=2 SV=1	3	3	0.982882	1.07565	0.934383	1.02257	1.00387	0.901399
O35964	Endophilin-A2 OS=Rattus norvegicus GN=Sh3gl1 PE=1 SV=1	2	1	0.988932	0.941893	0.981868	0.935165	0.961964	0.0319493
P63281	SUMO-conjugating enzyme UBC9 OS=Rattus norvegicus GN=Ube2i PE=1 SV=1	1	1	1.09693	1.16135	0.874755	0.926125	1.01479	0.835325
P47819	Glial fibrillary acidic protein OS=Rattus norvegicus GN=Gfap PE=1 SV=2	7	5	1.1098	1.48387	1.12093	1.49875	1.30334	0.0314379
D3ZXA6	Pyruvate dehydrogenase phosphatase regulatory subunit OS=Rattus norvegicus GN=Pdpr PE=1 SV=1	5	5	0.988398	1.06188	0.915558	0.983623	0.987364	0.687254
D4A0W1	ER membrane protein complex subunit 4 OS=Rattus norvegicus GN=Emc4 PE=1 SV=1	2	2	0.986226	0.947107	1.02992	0.989068	0.98808	0.507438
D3ZRC4	Patatin-like phospholipase domain-containing 8 OS=Rattus norvegicus GN=Pnpla8 PE=1 SV=1	5	5	0.92987	1.03948	0.888779	0.993545	0.962919	0.309437
Q8BHI5	O-acyltransferase OS=Rattus norvegicus GN=Dgat1 PE=1 SV=1	1	1	0.900905	1.00704	0.892377	0.997509	0.949458	0.149749
D4ABP9	F-box only protein 3 OS=Rattus norvegicus GN=Fbxo3 PE=3 SV=1	2	2	0.908907	0.971154	0.944766	1.00947	0.958574	0.0988172
Q498T4	39S ribosomal protein L2, mitochondrial OS=Rattus norvegicus GN=Mrpl2 PE=2 SV=1	1	1	1.00616	0.961388	0.933057	0.891541	0.948035	0.0745045
G3V9T1	Cysteine-rich secretory protein LCCL domain-containing 2 OS=Rattus norvegicus GN=Crispld2 PE=4 SV=1	1	1	0.941453	0.942499	1.04164	1.0428	0.992098	0.793983
D3ZC46	Transcription factor 25 OS=Rattus norvegicus GN=Tcf25 PE=1 SV=2	1	1	0.98956	1.01099	0.944415	0.964866	0.977458	0.170897
D4A4L5	Iron-sulfur cluster assembly 2 OS=Rattus norvegicus GN=Isca2 PE=1 SV=1	3	3	0.882641	1.05134	0.95	1.13158	1.00389	0.945796
Q5BJX0	N-terminal Xaa-Pro-Lys N-methyltransferase 1 OS=Rattus norvegicus GN=Ntmt1 PE=2 SV=3	1	1	0.925243	1.00358	0.974124	1.0566	0.989889	0.725605
F2W8B0	Catechol-O-methyltransferase OS=Rattus norvegicus GN=Comt PE=4 SV=1	1	1	1.08268	0.962253	0.960149	0.853348	0.964608	0.478648
D3Z9E1	Elastin microfibril interfacer 1 OS=Rattus norvegicus GN=Emilin1 PE=1 SV=1	2	2	0.983134	0.997824	0.896329	0.909722	0.946752	0.0824528
Q9WVR3	Phosphatidylinositol 3,4,5-trisphosphate 5-phosphatase 2 OS=Rattus norvegicus GN=Inppl1 PE=1 SV=1	5	5	0.94517	0.845431	0.984766	0.880849	0.914054	0.0335972
G3V9X6	DNA repair protein RAD50 OS=Rattus norvegicus GN=Rad50 PE=1 SV=1	3	3	0.97418	1.03228	1.0603	1.12354	1.04757	0.176108
G3V8P5	Similar to cDNA sequence BC017158 OS=Rattus norvegicus GN=RGD1310127 PE=1 SV=1	6	5	1.12129	1.1448	1.00835	1.02949	1.07598	0.0642546
Q99ND9	RWD domain-containing protein 1 OS=Rattus norvegicus GN=Rwdd1 PE=2 SV=1	1	1	1.10955	1.0508	1.1967	1.13333	1.12259	0.00663791
B4F778	Replication factor C (Activator 1) 4 (Predicted), isoform CRA_a OS=Rattus norvegicus GN=Rfc4 PE=1 SV=1	2	2	1.00332	1.0332	0.944763	0.972903	0.988548	0.570556
D3ZAQ4	Proteasome assembly chaperone 2 OS=Rattus norvegicus GN=Psmg2 PE=1 SV=1	2	2	0.929744	1.02872	0.917975	1.0157	0.973033	0.382378
Q5XIE8	Integral membrane protein 2B OS=Rattus norvegicus GN=Itm2b PE=2 SV=1	3	3	0.974235	0.94847	1.01966	0.992697	0.983766	0.321115
F1M392	LIM and calponin homology domains 1 OS=Rattus norvegicus GN=Limch1 PE=1 SV=2	1	1	0.920466	0.9154	1.04606	1.0403	0.980556	0.610389
Q6QI17	LRRGT00191 OS=Rattus norvegicus GN=Serinc1 PE=2 SV=1	2	2	0.967004	0.973922	0.935633	0.942327	0.954722	0.00279567
Q1WIM2	Cell adhesion molecule 2 OS=Rattus norvegicus GN=Cadm2 PE=1 SV=2	1	1	0.881783	0.931202	0.823157	0.86929	0.876358	0.00142244
Q6AYB3	Pre-mRNA-splicing factor ISY1 homolog OS=Rattus norvegicus GN=Isy1 PE=2 SV=1	2	2	1.11993	1.14391	1.10498	1.12864	1.12436	4.98143e-06
Q6TUD4	Protein YIPF3 OS=Rattus norvegicus GN=Yipf3 PE=2 SV=1	2	2	1.03407	0.980693	1.07751	1.02189	1.02854	0.201909
Q75UQ2	Craniofacial development protein 1 OS=Rattus norvegicus GN=Cfdp1 PE=1 SV=1	3	3	0.890625	0.966797	0.924949	1.00406	0.946607	0.0737579
M0R809	Guanine nucleotide-binding protein subunit gamma OS=Rattus norvegicus GN=Gng4 PE=3 SV=1	1	1	1.00884	1.09834	0.895537	0.974988	0.994427	0.898761
O35303-5	Isoform 5 of Dynamin-1-like protein OS=Rattus norvegicus GN=Dnm1l	16	1	0.895588	0.845588	0.935484	0.883257	0.889979	0.00101741
A0A0B4J2J1	Fc fragment of IgG receptor IIIa OS=Rattus norvegicus GN=Fcgr3a PE=1 SV=1	2	2	1.2025	1.55621	1.04335	1.35026	1.28808	0.0385816
B0K019	BAG family molecular chaperone regulator 1 OS=Rattus norvegicus GN=Bag1 PE=2 SV=1	2	2	1.01271	0.955249	1.07005	1.00934	1.01184	0.631696
P14141	Carbonic anhydrase 3 OS=Rattus norvegicus GN=Ca3 PE=1 SV=3	2	2	0.928283	0.912121	1.00437	0.986885	0.957915	0.108191
G3V940	Coronin OS=Rattus norvegicus GN=Coro1b PE=1 SV=1	4	4	0.967979	1.0105	1.01822	1.06295	1.01491	0.472393
G3V8K2	Guanine nucleotide-binding protein subunit gamma OS=Rattus norvegicus GN=Gng3 PE=1 SV=1	2	2	1.09756	1.0464	0.911561	0.869071	0.981149	0.739724
P40615	H/ACA ribonucleoprotein complex subunit 4 OS=Rattus norvegicus GN=Dkc1 PE=1 SV=4	3	3	0.830562	0.982921	0.810171	0.95879	0.895611	0.0550021
Q4FZS5	Hypothetical LOC287798 OS=Rattus norvegicus GN=MGC95210 PE=1 SV=1	1	1	0.897137	0.981077	0.901072	0.98538	0.941167	0.0518796
A5I9F0	Protein tyrosine phosphatase receptor type K OS=Rattus norvegicus GN=Ptprk PE=1 SV=1	2	2	1.11111	0.974174	1.09532	0.960332	1.03523	0.406537
P19836	Choline-phosphate cytidylyltransferase A OS=Rattus norvegicus GN=Pcyt1a PE=1 SV=2	4	4	0.93246	0.938508	0.99623	1.00269	0.967473	0.130178
F1M589	Promyelocytic leukemia OS=Rattus norvegicus GN=Pml PE=1 SV=3	2	2	1.0255	1.06929	0.940519	0.980681	1.004	0.89052
Q9JI56	SNAP-29 protein OS=Rattus norvegicus GN=Snap29 PE=1 SV=1	2	2	0.982549	0.939714	1.01198	0.967865	0.975528	0.155158
A0A0G2JWH4	1-acyl-sn-glycerol-3-phosphate acyltransferase delta OS=Rattus norvegicus GN=Agpat4 PE=4 SV=1	1	1	1.04671	0.989871	1.01418	0.959106	1.00247	0.898669
A0A0G2K089	DENN domain-containing 4C OS=Rattus norvegicus GN=Dennd4c PE=1 SV=1	4	4	1.04025	0.990497	1.0604	1.00969	1.02521	0.156653
F1M5V2	GLI pathogenesis-related 2 OS=Rattus norvegicus GN=Glipr2 PE=1 SV=3	1	1	0.996791	1.01176	1.13244	1.14945	1.07261	0.117319
A0A0G2K4T8	Mitochondrial intermediate peptidase OS=Rattus norvegicus GN=Mipep PE=1 SV=1	3	3	0.986793	0.920761	1.05776	0.986976	0.988072	0.684681
D3ZU52	COP9 (Constitutive photomorphogenic) homolog, subunit 7b (Arabidopsis thaliana) (Predicted), isoform CRA_b OS=Rattus norvegicus GN=Cops7b PE=1 SV=1	1	1	1.25334	0.96123	1.36265	1.04506	1.15557	0.143183
P14056	Serine/threonine-protein kinase A-Raf OS=Rattus norvegicus GN=Araf PE=1 SV=1	3	2	0.913785	0.944472	0.951801	0.983765	0.948455	0.011525
Q8R4A1	ERO1-like protein alpha OS=Rattus norvegicus GN=Ero1a PE=1 SV=1	6	5	0.939409	0.978468	0.925506	0.963986	0.951842	0.00679795
O88279	Slit homolog 1 protein OS=Rattus norvegicus GN=Slit1 PE=1 SV=1	2	2	1.00107	0.895522	1.08681	0.972222	0.988904	0.788259
F1M5M9	SLIT-ROBO Rho GTPase-activating protein 3 OS=Rattus norvegicus GN=Srgap3 PE=1 SV=2	2	2	1.00213	1.10293	0.998937	1.09942	1.05085	0.130782
D3ZQC1	Hexosyltransferase OS=Rattus norvegicus GN=B3galt6 PE=3 SV=1	1	1	1.00479	1.18807	0.973168	1.15067	1.07917	0.185999
D4A7G5	Glucosidase, alpha; neutral C OS=Rattus norvegicus GN=Ganc PE=1 SV=1	3	3	1.10152	1.02742	1.07212	1	1.05026	0.0682164
Q5M827	Pirin OS=Rattus norvegicus GN=Pir PE=1 SV=1	2	2	1.11688	1.03011	1.04646	0.965155	1.03965	0.250292
P62856	40S ribosomal protein S26 OS=Rattus norvegicus GN=Rps26 PE=3 SV=3	2	2	1.13497	1.08878	0.99789	0.957278	1.04473	0.314419
Q5HZX7	Lipid droplet-associated hydrolase OS=Rattus norvegicus GN=Ldah PE=2 SV=1	1	1	1.08414	1.04694	1.09039	1.05296	1.06861	0.000755057
P42346	Serine/threonine-protein kinase mTOR OS=Rattus norvegicus GN=Mtor PE=1 SV=1	4	4	0.883396	0.930037	0.866027	0.911751	0.897803	0.000377099
O70593	Small glutamine-rich tetratricopeptide repeat-containing protein alpha OS=Rattus norvegicus GN=Sgta PE=1 SV=1	2	2	1.01173	1.01599	1.01335	1.01762	1.01467	3.1362e-05
Q9QY17	Protein kinase C and casein kinase substrate in neurons 2 protein OS=Rattus norvegicus GN=Pacsin2 PE=1 SV=2	4	4	0.998947	1.14737	0.929481	1.06758	1.03584	0.471457
D4A914	5'-3' exoribonuclease 2 OS=Rattus norvegicus GN=Xrn2 PE=1 SV=3	2	2	0.901803	0.981025	0.982937	1.06929	0.983763	0.651783
Q6AYT7	Monoacylglycerol lipase ABHD12 OS=Rattus norvegicus GN=Abhd12 PE=2 SV=1	2	2	0.926357	0.967539	0.993763	1.03794	0.9814	0.457003
A0A0G2JY58	Pogo transposable element-derived with ZNF domain OS=Rattus norvegicus GN=Pogz PE=1 SV=1	3	3	0.95986	1.00652	0.940511	0.986234	0.973282	0.115179
O88637	Ethanolamine-phosphate cytidylyltransferase OS=Rattus norvegicus GN=Pcyt2 PE=1 SV=1	2	2	0.988132	1.00413	0.952263	0.967678	0.97805	0.102032
Q4QQU6	Survival of motor neuron-related-splicing factor 30 OS=Rattus norvegicus GN=Smndc1 PE=2 SV=1	3	3	0.93194	1	0.98207	1.05379	0.99195	0.759729
D3ZY02	Protein-glucosylgalactosylhydroxylysine glucosidase OS=Rattus norvegicus GN=Pgghg PE=1 SV=3	3	3	1.13744	1.02725	1.0596	0.956954	1.04531	0.271745
Q68FP2	Serum paraoxonase/lactonase 3 OS=Rattus norvegicus GN=Pon3 PE=2 SV=1	2	2	0.900563	1.09287	0.804357	0.976121	0.943478	0.389529
D4A255	TBC/LysM-associated domain-containing 1 OS=Rattus norvegicus GN=Tldc1 PE=1 SV=3	3	3	0.82	0.799149	0.945071	0.92104	0.871315	0.0120483
Q5U321	Ccnd3 protein OS=Rattus norvegicus GN=Ccnd3 PE=1 SV=1	1	1	1.10996	0.944157	1.13746	0.967552	1.03978	0.447977
B1WC56	H/ACA ribonucleoprotein complex subunit 2 OS=Rattus norvegicus GN=Nhp2 PE=1 SV=1	1	1	0.99126	1.16247	0.983172	1.15298	1.07247	0.191865
Q9EPF2	Cell surface glycoprotein MUC18 OS=Rattus norvegicus GN=Mcam PE=1 SV=2	2	2	1.08347	1.02521	1.10514	1.04571	1.06489	0.0114272
F1LSX7	Exosome component 5 OS=Rattus norvegicus GN=Exosc5 PE=1 SV=1	4	4	0.870054	0.911421	0.893352	0.935826	0.902663	0.000426604
D4A5V8	Mitogen-activated protein kinase OS=Rattus norvegicus GN=Mapk9 PE=1 SV=1	5	4	1.05619	0.973813	1.09193	1.00677	1.03218	0.264402
P62332	ADP-ribosylation factor 6 OS=Rattus norvegicus GN=Arf6 PE=1 SV=2	2	2	1.0385	1.03529	0.994368	0.991295	1.01486	0.28802
Q4KLJ0	High mobility group nucleosomal binding domain 2 OS=Rattus norvegicus GN=LOC100360316 PE=1 SV=1	1	1	1.00257	0.958805	0.984825	0.941831	0.972009	0.0833061
A0A0G2K9E5	Leucyl-tRNA synthetase 2, mitochondrial OS=Rattus norvegicus GN=Lars2 PE=1 SV=1	2	2	1.02907	1.02854	0.938313	0.937831	0.983439	0.550524
Q08877-5	Isoform 5 of Dynamin-3 OS=Rattus norvegicus GN=Dnm3	9	4	0.912412	0.997658	0.955839	1.04514	0.977763	0.463591
D4A6D9	HCLS1-binding protein 3 OS=Rattus norvegicus GN=Hs1bp3 PE=1 SV=1	5	5	0.846788	0.915365	0.958722	1.03636	0.93931	0.177363
A0A0G2JU05	LLGL2, scribble cell polarity complex component OS=Rattus norvegicus GN=Llgl2 PE=1 SV=1	1	1	0.988354	0.998987	0.910023	0.919814	0.954295	0.0932326
Q9ES73	Melanoma-associated antigen D1 OS=Rattus norvegicus GN=Maged1 PE=1 SV=3	1	1	0.959274	1.01178	0.964956	1.01777	0.988444	0.478491
P84087	Complexin-2 OS=Rattus norvegicus GN=Cplx2 PE=1 SV=1	2	2	1.10571	1.10854	1.12933	1.13222	1.11895	2.39298e-06
D3ZCR4	Protein phosphatase 4, regulatory subunit 3B OS=Rattus norvegicus GN=Ppp4r3b PE=1 SV=1	2	2	0.886724	1.48346	0.820889	1.37332	1.1411	0.432965
P19139	Casein kinase II subunit alpha OS=Rattus norvegicus GN=Csnk2a1 PE=1 SV=2	2	2	1.01609	1.07577	0.949564	1.00533	1.01169	0.667181
D4A1J6	Ankyrin repeat and FYVE domain-containing 1 OS=Rattus norvegicus GN=Ankfy1 PE=1 SV=3	6	6	0.938668	0.959272	0.967885	0.98913	0.963739	0.0133044
D4A5K6	Zinc metallopeptidase STE24 OS=Rattus norvegicus GN=Zmpste24 PE=1 SV=1	2	2	1.02298	0.954047	0.956076	0.891654	0.956189	0.153437
C6ZII9	NAD-dependent protein deacetylase OS=Rattus norvegicus GN=Sirt3 PE=1 SV=1	2	2	0.964092	1.07034	0.936455	1.03966	1.00264	0.935804
G3V8M8	Poly (ADP-ribose) glycohydrolase, isoform CRA_b OS=Rattus norvegicus GN=Parg PE=1 SV=1	2	2	1.0623	1.13976	1.00667	1.08008	1.0722	0.0388617
F1LVR4	Calcium/calmodulin-dependent protein kinase ID OS=Rattus norvegicus GN=Camk1d PE=3 SV=2	2	2	0.953906	1.12567	0.908083	1.07159	1.01481	0.779199
D4A6D7	Tetratricopeptide repeat protein 19, mitochondrial OS=Rattus norvegicus GN=Ttc19 PE=3 SV=1	3	3	0.913225	0.938747	0.903996	0.92926	0.921307	5.55696e-05
A0A0A1FZN8	NADH-ubiquinone oxidoreductase chain 5 OS=Rattus norvegicus GN=ND5 PE=3 SV=1	1	1	0.99747	0.941296	0.949422	0.895954	0.946035	0.0409095
D3ZWL6	Adenosylhomocysteinase OS=Rattus norvegicus GN=Ahcyl2 PE=1 SV=3	10	4	0.849634	0.98492	0.898405	1.04146	0.943604	0.237326
A0A0G2JZ53	Baculoviral IAP repeat-containing 6 OS=Rattus norvegicus GN=Birc6 PE=1 SV=1	5	5	0.918101	0.97208	0.958232	1.01457	0.965746	0.135919
B2RZB7	Small nuclear ribonucleoprotein D1 OS=Rattus norvegicus GN=Snrpd1 PE=1 SV=1	3	3	0.957302	1.08637	0.911316	1.03418	0.997291	0.946932
D4A4Q4	OCIA domain-containing 2 OS=Rattus norvegicus GN=Ociad2 PE=1 SV=3	3	3	0.886394	0.799282	1.03513	0.933403	0.913553	0.12901
G3V615	Complement factor B OS=Rattus norvegicus GN=Cfb PE=1 SV=1	3	3	1.04939	1.01275	0.921642	0.889459	0.968309	0.431349
O08658	Nuclear pore complex protein Nup88 OS=Rattus norvegicus GN=Nup88 PE=1 SV=1	6	6	1.01854	1.03708	1.01906	1.03761	1.02807	0.00193439
Q9JKC9	Synergin gamma OS=Rattus norvegicus GN=Synrg PE=1 SV=3	4	4	0.958333	0.996124	0.939667	0.976722	0.967712	0.0373273
G3V7K5	NPC intracellular cholesterol transporter 1 OS=Rattus norvegicus GN=Npc1 PE=1 SV=1	2	2	1.08796	1.0088	0.985558	0.913845	0.99904	0.979512
Q56A27	Nuclear cap-binding protein subunit 1 OS=Rattus norvegicus GN=Ncbp1 PE=1 SV=1	3	3	1.01589	1.09636	0.962136	1.03835	1.02818	0.349577
Q5I0K8	28S ribosomal protein S7, mitochondrial OS=Rattus norvegicus GN=Mrps7 PE=2 SV=2	2	2	0.92444	0.98041	0.957488	1.01546	0.969449	0.161961
D3ZVB7	Osteoglycin OS=Rattus norvegicus GN=Ogn PE=1 SV=1	1	1	1.01902	1.05758	0.956102	0.992282	1.00625	0.780403
Q63666-4	Isoform 4 of Vesicle-associated membrane protein 1 OS=Rattus norvegicus GN=Vamp1	3	2	0.987568	0.956241	0.96361	0.933042	0.960115	0.0120569
G3V851	Solute carrier family 17 (Sodium-dependent inorganic phosphate cotransporter), member 6 OS=Rattus norvegicus GN=Slc17a6 PE=4 SV=1	1	1	0.952563	1.00431	0.916974	0.96679	0.96016	0.0695847
G3V9R0	LUC7-like OS=Rattus norvegicus GN=Luc7l PE=1 SV=3	5	3	0.919944	1.01897	0.912345	1.01056	0.965454	0.271975
Q91XR8	Phospholipid hydroperoxide glutathione peroxidase, nuclear OS=Rattus norvegicus GN=Gpx4 PE=1 SV=3	2	2	1.05967	0.896644	1.03325	0.874286	0.965961	0.496262
Q5M920	EBNA1-binding protein 2 OS=Rattus norvegicus GN=Ebna1bp2 PE=1 SV=1	1	1	0.973092	1.0411	0.930309	0.995323	0.984955	0.538454
M0RDN9	Ubiquitin carboxyl-terminal hydrolase 19 OS=Rattus norvegicus GN=Usp19 PE=1 SV=1	3	3	1.00607	1.03185	0.939566	0.963645	0.985282	0.504434
M0RC57	Small ArfGAP 1 OS=Rattus norvegicus GN=Smap1 PE=1 SV=1	2	2	0.970789	1.00097	0.993523	1.02441	0.997425	0.823508
G3V6P8	Guanine nucleotide-binding protein subunit gamma OS=Rattus norvegicus GN=Gng12 PE=1 SV=1	1	1	1.0132	1.02285	0.983728	0.993097	1.00322	0.732118
Q4QQW8	Putative phospholipase B-like 2 OS=Rattus norvegicus GN=Plbd2 PE=1 SV=2	3	3	0.92493	0.937905	1.02887	1.0433	0.98375	0.61302
Q8R2E7	FAS-associated death domain protein OS=Rattus norvegicus GN=Fadd PE=1 SV=1	1	1	0.987691	0.973904	1.0157	1.00152	0.994703	0.577013
Q09167	Serine/arginine-rich splicing factor 5 OS=Rattus norvegicus GN=Srsf5 PE=1 SV=1	3	2	1.02185	1.08791	1.02133	1.08735	1.05461	0.0286342
D3ZQV8	PHD finger protein 6 OS=Rattus norvegicus GN=Phf6 PE=1 SV=1	1	1	0.966443	0.977469	0.995064	1.00642	0.986348	0.176576
M0R7T1	Phosphatase and actin regulator OS=Rattus norvegicus GN=Phactr4 PE=1 SV=2	1	1	0.990663	1.05209	0.933766	0.991663	0.992045	0.753137
D3ZGQ8	Remodeling and spacing factor 1 OS=Rattus norvegicus GN=Rsf1 PE=1 SV=2	3	3	0.918256	1.00454	0.922866	1.00958	0.963812	0.198061
D3ZGQ2	Thymidine kinase 2, mitochondrial OS=Rattus norvegicus GN=Tk2 PE=4 SV=1	1	1	1.00396	1.10505	0.906488	0.997763	1.00332	0.937501
Q9Z254	PDZ domain-containing protein GIPC1 OS=Rattus norvegicus GN=Gipc1 PE=1 SV=2	4	4	0.875701	0.885628	0.981616	0.992743	0.933922	0.076303
D4A2K1	4-hydroxy-2-oxoglutarate aldolase 1 OS=Rattus norvegicus GN=Hoga1 PE=1 SV=1	1	1	1.04051	1.2441	0.867465	1.0372	1.04732	0.561622
Q80ZF4	Mitogen-activated protein kinase-activated protein kinase-2 OS=Rattus norvegicus GN=Mapkapk2 PE=2 SV=1	3	3	1.07521	1.02331	1.11477	1.06096	1.06856	0.0109921
A0A0G2KAE2	Tumor suppressor candidate 3 OS=Rattus norvegicus GN=Tusc3 PE=4 SV=1	2	2	0.963964	1.06496	1.0165	1.123	1.04211	0.261138
Q4V8B2	DCN1-like protein 3 OS=Rattus norvegicus GN=Dcun1d3 PE=2 SV=1	2	2	0.992686	0.953681	1.00246	0.963072	0.977975	0.107544
D5MTG9	UBR1 protein OS=Rattus norvegicus GN=Ubr1 PE=2 SV=1	2	2	0.972302	1.12942	1.00197	1.16388	1.06689	0.204304
M0R6J0	Mitochondrial ribosomal protein L39 OS=Rattus norvegicus GN=Mrpl39 PE=1 SV=2	3	3	1.02568	0.979355	1.04301	0.995904	1.01099	0.472766
D4A0T8	Dehydrogenase/reductase 7 OS=Rattus norvegicus GN=Dhrs7 PE=1 SV=3	4	4	0.950093	0.986474	0.979327	1.01683	0.98318	0.265554
Q9JK93	Agrin (Fragment) OS=Rattus norvegicus GN=Agrn PE=2 SV=1	2	2	0.92559	1.02359	0.918505	1.01576	0.970862	0.342347
Q925D6	Mitogen-activated protein kinase kinase 6 OS=Rattus norvegicus GN=Map2k6 PE=1 SV=1	2	2	1.08723	1.00638	0.937615	0.86789	0.97478	0.610482
D4A500	HD domain containing 3 (Predicted), isoform CRA_b OS=Rattus norvegicus GN=Hddc3 PE=1 SV=1	2	2	0.85523	0.977406	0.75816	0.866469	0.864316	0.0232523
O35824	DnaJ homolog subfamily A member 2 OS=Rattus norvegicus GN=Dnaja2 PE=1 SV=1	4	3	0.979895	0.975586	1.0059	1.00147	0.990713	0.267259
D4A6P1	RCG40132, isoform CRA_a OS=Rattus norvegicus GN=Sez6l2 PE=4 SV=1	4	4	0.969697	0.953598	0.990329	0.973888	0.971878	0.00977625
F1LP80	Neurosecretory protein VGF OS=Rattus norvegicus GN=Vgf PE=4 SV=2	6	6	0.950348	1.27007	0.938588	1.25435	1.10334	0.30335
Q6P7A9	Lysosomal alpha-glucosidase OS=Rattus norvegicus GN=Gaa PE=2 SV=1	6	1	1.00737	1.10472	1.05946	1.16184	1.08335	0.0443071
B1WBS4	Similar to Vacuolar protein sorting 26 homolog (VPS26 protein homolog), isoform CRA_a OS=Rattus norvegicus GN=Vps26b PE=1 SV=1	1	1	1.06663	1.00989	1.00639	0.952849	1.00894	0.713784
D3ZDI7	Serine/threonine-protein phosphatase 2A 56 kDa regulatory subunit OS=Rattus norvegicus GN=Ppp2r5a PE=1 SV=1	3	3	0.868332	0.953006	0.863579	0.947789	0.908177	0.00939475
M0RD40	SIK family kinase 3 OS=Rattus norvegicus GN=Sik3 PE=1 SV=2	1	1	0.996117	1.07379	0.887543	0.956747	0.978548	0.60102
P60881-2	Isoform 2 of Synaptosomal-associated protein 25 OS=Rattus norvegicus GN=Snap25	7	1	0.946182	1.04324	0.79085	0.871972	0.913061	0.156894
Q921A4	Cytoglobin OS=Rattus norvegicus GN=Cygb PE=1 SV=1	2	2	1.14699	1.11414	1.00586	0.977051	1.06101	0.188562
A0A023IM54	TAP binding protein OS=Rattus norvegicus GN=Tapbp PE=2 SV=1	4	4	0.918967	1.02093	1.04878	1.16514	1.03845	0.476182
P29419	ATP synthase subunit e, mitochondrial OS=Rattus norvegicus GN=Atp5i PE=1 SV=3	1	1	0.734781	0.674973	1.00536	0.923527	0.83466	0.0775296
D3ZIX4	H1 histone family, member X OS=Rattus norvegicus GN=H1fx PE=1 SV=1	4	4	1.08847	1.04529	0.915817	0.879486	0.982265	0.735903
Q6P6Q2	Keratin, type II cytoskeletal 5 OS=Rattus norvegicus GN=Krt5 PE=1 SV=1	3	1	0.99233	1.1395	1.02832	1.18082	1.08524	0.105007
Q5U1W8	High-mobility group nucleosome binding domain 1 OS=Rattus norvegicus GN=LOC100911295 PE=1 SV=1	1	1	1.1085	1.0449	1.04274	0.982906	1.04476	0.131551
D3ZJ01	Similar to RIKEN cDNA 2310035C23 OS=Rattus norvegicus GN=RGD1307235 PE=1 SV=1	5	5	1.03639	1.07228	1.09942	1.13749	1.0864	0.00678079
D4ADK7	Antigen p97 (Melanoma associated) identified by monoclonal antibodies 133.2 and 96.5 (Predicted) OS=Rattus norvegicus GN=Meltf PE=3 SV=2	2	2	1.04733	0.912387	0.989063	0.861626	0.952602	0.291879
A0A0G2JXT6	Myotubularin-related protein 6 OS=Rattus norvegicus GN=Mtmr6 PE=1 SV=1	1	1	1.16901	0.903425	0.458187	0.354093	0.721178	0.194596
D3ZP15	RAB9B, member RAS oncogene family OS=Rattus norvegicus GN=Rab9b PE=4 SV=1	4	4	0.960848	0.997697	0.996656	1.03488	0.99752	0.87503
D3ZG48	DExD-box helicase 50 OS=Rattus norvegicus GN=Ddx50 PE=1 SV=1	5	4	0.929176	1.08998	0.928349	1.08901	1.00913	0.850544
D4ABX9	ER membrane protein complex subunit 6 OS=Rattus norvegicus GN=Emc6 PE=1 SV=1	1	1	1.09039	1.1233	0.982118	1.01176	1.05189	0.166782
D4A739	Catenin (Cadherin associated protein), alpha-like 1 (Predicted) OS=Rattus norvegicus GN=Ctnnal1 PE=1 SV=1	1	1	1.14122	1.006	1.09238	0.962944	1.05064	0.257189
A0A0G2K2A5	Ubiquitin carboxyl-terminal hydrolase OS=Rattus norvegicus GN=Uchl5 PE=1 SV=1	5	5	1.01159	1.00241	0.985419	0.976482	0.993976	0.477916
Q9JL55	Glycerophosphodiester phosphodiesterase 1 OS=Rattus norvegicus GN=Gde1 PE=1 SV=2	1	1	1.00096	0.868672	1.16444	1.01056	1.01116	0.859735
G3V6S8	Serine/arginine-rich splicing factor 6 OS=Rattus norvegicus GN=Srsf6 PE=1 SV=1	3	2	1.03048	1.05408	1.03353	1.0572	1.04382	0.00070342
O70185	Nuclear factor 1 OS=Rattus norvegicus GN=Nfib PE=1 SV=2	1	1	0.950612	0.933847	0.990557	0.973088	0.962026	0.022525
B5DEL2	Cleavage and polyadenylation-specific factor 1 OS=Rattus norvegicus GN=Cpsf1 PE=1 SV=1	6	6	0.947178	1.26546	0.925861	1.23698	1.09387	0.342729
P36506	Dual specificity mitogen-activated protein kinase kinase 2 OS=Rattus norvegicus GN=Map2k2 PE=1 SV=1	6	4	0.958923	0.921041	1.02789	0.98728	0.973782	0.289477
Q5XIP1	Protein pelota homolog OS=Rattus norvegicus GN=Pelo PE=1 SV=1	3	3	1.14286	1.02118	1.05305	0.940941	1.03951	0.38051
A0A0G2JX25	GMP reductase OS=Rattus norvegicus GN=Gmpr2 PE=1 SV=1	2	2	0.835317	0.753571	0.975892	0.880389	0.861293	0.0242321
Q5HZE2	Transmembrane protein 120A OS=Rattus norvegicus GN=Tmem120a PE=2 SV=1	2	2	1.03943	1.12765	0.904374	0.981132	1.01315	0.789677
Q6AYC2	Immunity-related GTPase family M protein OS=Rattus norvegicus GN=Irgm PE=2 SV=1	6	6	1.01442	1.07981	0.946188	1.00717	1.0119	0.67844
P50554	4-aminobutyrate aminotransferase, mitochondrial OS=Rattus norvegicus GN=Abat PE=1 SV=3	2	2	0.897872	0.849362	0.862986	0.81636	0.856645	0.000145434
B4F7F3	ARVCF, delta catenin family member OS=Rattus norvegicus GN=Arvcf PE=1 SV=1	3	3	0.940731	0.953654	0.940731	0.953654	0.947193	7.76584e-06
A0A0G2KAT3	Replication protein A subunit OS=Rattus norvegicus GN=Rpa1 PE=1 SV=1	3	3	1.00666	1.02759	0.996234	1.01695	1.01186	0.128846
P21571	ATP synthase-coupling factor 6, mitochondrial OS=Rattus norvegicus GN=Atp5j PE=1 SV=1	1	1	0.930519	0.91073	0.9438	0.923729	0.927194	4.23075e-05
F7FNS3	Derlin OS=Rattus norvegicus GN=Derl1 PE=1 SV=1	1	1	0.940682	1.112	0.899661	1.06351	1.00396	0.93953
D3ZCF8	ATP-binding cassette, subfamily A (ABC1), member 8a OS=Rattus norvegicus GN=Abca8a PE=1 SV=3	8	8	0.915948	1.01595	0.871259	0.96638	0.942384	0.115115
D4A9U6	Ubiquitin protein ligase E3 component n-recognin 2 OS=Rattus norvegicus GN=Ubr2 PE=1 SV=3	2	2	1.02505	1.06936	1.01237	1.05614	1.04073	0.0218481
Q8K5A9	Death domain-containing membrane protein NRADD OS=Rattus norvegicus GN=Nradd PE=1 SV=2	3	3	0.963768	1.13043	0.829306	0.97272	0.974057	0.688252
D3ZUN5	Protein O-fucosyltransferase 2 OS=Rattus norvegicus GN=Pofut2 PE=1 SV=1	3	3	0.964221	1.00091	1.0114	1.04988	1.0066	0.720734
F1LVZ9	HECT domain E3 ubiquitin protein ligase 3 OS=Rattus norvegicus GN=Hectd3 PE=1 SV=3	5	5	0.983372	1.04942	0.955137	1.01929	1.00181	0.932997
B1H262	Protein phosphatase 1, regulatory subunit 9B OS=Rattus norvegicus GN=Ppp1r9b PE=2 SV=1	4	4	0.952636	1.01028	1.03747	1.10024	1.02516	0.443104
A0A096MJ28	Integrator complex subunit 2 OS=Rattus norvegicus GN=Ints2 PE=1 SV=1	2	2	1.09558	1.01079	1.03245	0.952542	1.02284	0.468748
O54783	Choline/ethanolamine kinase OS=Rattus norvegicus GN=Chkb PE=1 SV=3	2	2	1.0368	1.03002	1.00611	0.99953	1.01812	0.0919048
D3ZCC7	SIX homeobox 6 OS=Rattus norvegicus GN=Six6 PE=4 SV=1	2	2	0.908012	0.975413	0.986188	1.05939	0.982251	0.587635
G3V7I7	Leucine-rich repeat-containing 40 OS=Rattus norvegicus GN=Lrrc40 PE=1 SV=3	6	6	0.856287	1.00719	0.870889	1.02436	0.939681	0.221058
D3ZEY4	Diacylglycerol kinase OS=Rattus norvegicus GN=Dgkq PE=1 SV=1	2	2	0.989862	1.30645	0.905565	1.19519	1.09927	0.32215
F7EZZ0	Death-associated protein 3 OS=Rattus norvegicus GN=Dap3 PE=1 SV=1	3	3	0.980831	0.921041	0.954263	0.896092	0.938057	0.0157325
G3V6M4	Calpain-6 OS=Rattus norvegicus GN=Capn6 PE=3 SV=1	4	4	1.05599	1.07957	0.923143	0.943753	1.00061	0.988044
D3ZQI6	Exportin 4 OS=Rattus norvegicus GN=Xpo4 PE=1 SV=2	2	2	1.00701	1.09575	0.937799	1.02044	1.01525	0.654207
D4AE79	Charged multivesicular body protein 1A OS=Rattus norvegicus GN=Chmp1a PE=1 SV=1	2	2	1.00419	0.969288	1.007	0.972002	0.988119	0.284903
Q9WTT7	Basic leucine zipper and W2 domain-containing protein 2 OS=Rattus norvegicus GN=Bzw2 PE=1 SV=1	3	3	1.0435	1.15128	1.0704	1.18096	1.11154	0.0140449
G3V792	Cytoplasmic dynein 1 intermediate chain 1 OS=Rattus norvegicus GN=Dync1i1 PE=1 SV=3	6	6	0.900334	1.0417	0.909819	1.05268	0.976132	0.582846
D3ZEI6	Nuclear receptor coactivator 5 OS=Rattus norvegicus GN=Ncoa5 PE=1 SV=1	3	3	0.919218	1.00383	0.90536	0.988693	0.954274	0.112411
A0A1B0GWY3	RCG54790, isoform CRA_c OS=Rattus norvegicus GN=Tomm5 PE=1 SV=1	1	1	0.947898	0.949212	0.947069	0.948381	0.94814	2.81601e-11
A0A1W2Q627	Eukaryotic translation initiation factor 4E OS=Rattus norvegicus GN=Eif4e PE=1 SV=1	4	4	1.16098	1.03891	1.0537	0.942912	1.04913	0.313341
D3ZGY1	PYM homolog 1, exon junction complex-associated factor OS=Rattus norvegicus GN=Pym1 PE=1 SV=1	2	2	1.07753	1.03556	1.04252	1.00191	1.03938	0.0440661
Q4KLF8	Actin-related protein 2/3 complex subunit 5 OS=Rattus norvegicus GN=Arpc5 PE=1 SV=3	3	3	0.970209	1.06892	0.979354	1.07899	1.02437	0.429369
P19357	Solute carrier family 2, facilitated glucose transporter member 4 OS=Rattus norvegicus GN=Slc2a4 PE=1 SV=1	1	1	0.952423	0.92536	0.968486	0.940968	0.946809	0.00111134
D3ZER6	Transportin 2 OS=Rattus norvegicus GN=Tnpo2 PE=1 SV=2	8	5	1.12179	1.04573	1.043	0.972289	1.0457	0.185055
O88267	Acyl-coenzyme A thioesterase 1 OS=Rattus norvegicus GN=Acot1 PE=1 SV=1	7	3	0.828593	0.989003	0.938977	1.12076	0.969332	0.630773
A0A0G2K598	Transforming, acidic coiled-coil-containing protein 2 OS=Rattus norvegicus GN=Tacc2 PE=1 SV=1	2	1	1.0996	0.977867	1.01627	0.903766	0.999375	0.988272
B0BNJ4	ETHE1, persulfide dioxygenase OS=Rattus norvegicus GN=Ethe1 PE=1 SV=1	3	3	0.903822	1.11837	0.870202	1.07677	0.992292	0.904746
P07825	Synaptophysin OS=Rattus norvegicus GN=Syp PE=1 SV=1	1	1	0.926347	0.964226	0.941	0.979478	0.952763	0.0071944
D4A6N9	Integrator complex subunit 13 OS=Rattus norvegicus GN=Ints13 PE=1 SV=1	3	3	0.983957	1.07308	1.05444	1.14995	1.06536	0.103817
B0BNE7	Tetraspanin OS=Rattus norvegicus GN=Tspan7 PE=2 SV=1	1	1	0.841004	0.934196	0.808705	0.898317	0.870556	0.00370813
D3ZVH6	VPS41 HOPS complex subunit OS=Rattus norvegicus GN=Vps41 PE=1 SV=3	3	3	1.02307	1.05999	1.00773	1.04409	1.03372	0.0262011
Q6P503	ATPase H+-transporting V1 subunit D OS=Rattus norvegicus GN=Atp6v1d PE=1 SV=1	4	4	0.984916	0.965839	1.03352	1.0135	0.999444	0.971613
A0A0G2KB11	StAR-related lipid transfer domain-containing 10 OS=Rattus norvegicus GN=Stard10 PE=1 SV=1	2	2	1.03738	1.00187	1.02022	0.985294	1.01119	0.359166
Q8K585	High mobility group protein HMG-I/HMG-Y OS=Rattus norvegicus GN=Hmga1 PE=1 SV=3	1	1	1.11161	1.0045	0.968178	0.874891	0.989796	0.841698
D3ZJR7	Desmocollin 2 OS=Rattus norvegicus GN=Dsc2 PE=1 SV=3	1	1	0.897736	0.970897	0.939509	1.01607	0.956054	0.12923
G3V7J2	Interferon-inducible double-stranded RNA-dependent protein kinase activator A OS=Rattus norvegicus GN=Prkra PE=1 SV=1	4	4	1.19111	1.11242	1.0545	0.984834	1.08572	0.0978216
F1M403	Ubiquitin-conjugating enzyme E2O OS=Rattus norvegicus GN=Ube2o PE=1 SV=2	3	3	0.884692	0.869185	0.834584	0.819955	0.852104	6.23944e-05
Q03344	ATPase inhibitor, mitochondrial OS=Rattus norvegicus GN=Atpif1 PE=3 SV=2	1	1	1.11629	0.85614	1.16536	0.893773	1.00789	0.922501
P60192	SNARE-associated protein Snapin OS=Rattus norvegicus GN=Snapin PE=1 SV=1	2	2	0.979341	1.07209	0.932608	1.02093	1.00124	0.968034
Q68FW4	Syntaxin-18 OS=Rattus norvegicus GN=Stx18 PE=2 SV=1	2	2	1.12614	1.15338	1.03766	1.06276	1.09498	0.0124197
Q498C9	RCG33491, isoform CRA_b OS=Rattus norvegicus GN=Zfp207 PE=1 SV=1	1	1	0.986332	1.01631	1.02333	1.05444	1.0201	0.200379
F1LMQ3	Proteasome 26S subunit, non-ATPase 8 OS=Rattus norvegicus GN=Psmd8 PE=1 SV=1	3	3	1.0566	1.09434	0.965934	1.00043	1.02933	0.344917
Q5M960	Lsamp protein OS=Rattus norvegicus GN=Lsamp PE=2 SV=1	2	2	1.11493	0.968159	1.09264	0.948805	1.03113	0.49024
G3V8A4	5-methyltetrahydrofolate-homocysteine methyltransferase, isoform CRA_b OS=Rattus norvegicus GN=Mtr PE=1 SV=1	4	4	0.963153	1.05184	0.961917	1.05049	1.00685	0.797862
A0A0G2JSM4	BET1-like protein OS=Rattus norvegicus GN=Bet1l PE=1 SV=1	2	2	1.11111	1.68741	1.10619	1.67994	1.39616	0.0542873
D4A9L2	RCG34610, isoform CRA_c OS=Rattus norvegicus GN=Srsf1 PE=1 SV=1	3	3	0.933637	1.01618	0.905107	0.985123	0.960011	0.160696
P35284	Ras-related protein Rab-12 OS=Rattus norvegicus GN=Rab12 PE=1 SV=2	3	2	0.880031	1.11645	0.657518	0.834161	0.87204	0.224664
Q8CGS4	Charged multivesicular body protein 3 OS=Rattus norvegicus GN=Chmp3 PE=1 SV=3	3	3	1.05472	1.09167	1.02036	1.05611	1.05572	0.00869317
P62716	Serine/threonine-protein phosphatase 2A catalytic subunit beta isoform OS=Rattus norvegicus GN=Ppp2cb PE=2 SV=1	5	1	1.02174	1.11639	1.04735	1.14438	1.08247	0.0284136
Q02589	[Protein ADP-ribosylarginine] hydrolase OS=Rattus norvegicus GN=Adprh PE=1 SV=2	2	2	0.960818	0.996167	0.955123	0.990262	0.975592	0.0557398
Q5XI44	X-ray repair complementing defective repair in Chinese hamster cells 4 OS=Rattus norvegicus GN=Xrcc4 PE=1 SV=1	1	1	0.966182	0.949486	1.02405	1.00635	0.986517	0.465098
A0A0H2UHU1	60S ribosomal protein L37a OS=Rattus norvegicus GN=Rpl37a PE=3 SV=1	2	2	1.06194	0.93008	1.00355	0.878936	0.968626	0.465515
Q6PEC0	Bis(5'-nucleosyl)-tetraphosphatase [asymmetrical] OS=Rattus norvegicus GN=Nudt2 PE=2 SV=3	5	5	0.974613	0.979346	0.979248	0.984003	0.979302	3.73462e-05
D3Z8R4	RNA-binding motif protein 25-like 1 OS=Rattus norvegicus GN=Rbm25l1 PE=1 SV=3	6	5	0.953322	0.939024	0.908617	0.89499	0.923988	0.00130616
Q6P9V1	Tetraspanin OS=Rattus norvegicus GN=Cd81 PE=1 SV=1	2	2	0.880528	1.01396	0.873077	1.00538	0.943238	0.190108
Q71DI1	Dermcidin OS=Rattus norvegicus PE=2 SV=1	2	2	1.13072	1.16352	1.156	1.18953	1.15994	1.16046e-05
Q9ESH1	26S proteasome subunit S5a OS=Rattus norvegicus GN=Psmd4 PE=2 SV=1	10	1	1.03406	1.06767	0.972246	1.00384	1.01945	0.37782
Q5M7A3	Solute carrier family 35 member G2 OS=Rattus norvegicus GN=Slc35g2 PE=1 SV=1	1	1	0.932106	1.04744	0.907607	1.01991	0.976767	0.516425
Q5U1V9	Tetraspanin-31 OS=Rattus norvegicus GN=Tspan31 PE=2 SV=1	1	1	1.17284	0.978909	1.08262	0.903609	1.03449	0.57966
Q9Z1X1	Extended synaptotagmin-1 OS=Rattus norvegicus GN=Esyt1 PE=1 SV=1	11	1	1.08663	1.02903	1.02699	0.97256	1.0288	0.262446
P07483	Fatty acid-binding protein, heart OS=Rattus norvegicus GN=Fabp3 PE=1 SV=2	3	3	0.944215	1.01198	0.872804	0.935447	0.941112	0.0841214
Q68FS3	F-box only protein 7 OS=Rattus norvegicus GN=Fbxo7 PE=2 SV=1	2	2	1.02326	1.1051	0.987058	1.06601	1.04535	0.127196
D3ZUI1	Methylthioribulose-1-phosphate dehydratase OS=Rattus norvegicus GN=Apip PE=1 SV=3	3	3	0.952559	0.976696	1.01463	1.04034	0.996055	0.846515
A0A0G2K7T6	Nuclear pore complex protein Nup155 OS=Rattus norvegicus GN=Nup155 PE=1 SV=1	5	5	0.913807	1.05427	0.878067	1.01304	0.964795	0.426546
P97519	Hydroxymethylglutaryl-CoA lyase, mitochondrial OS=Rattus norvegicus GN=Hmgcl PE=2 SV=1	3	3	0.929988	0.951437	0.939109	0.960768	0.945325	0.000192783
Q6MG85	1-acyl-sn-glycerol-3-phosphate acyltransferase OS=Rattus norvegicus GN=Agpat1 PE=1 SV=1	3	3	0.920064	0.965228	0.937296	0.983306	0.951474	0.0138268
D3ZFQ8	Cytochrome c-1 OS=Rattus norvegicus GN=Cyc1 PE=1 SV=3	3	3	0.972609	0.936789	1.00435	0.967363	0.970278	0.0752599
G3V804	Sideroflexin OS=Rattus norvegicus GN=Sfxn3 PE=1 SV=1	5	3	0.949034	1.01767	0.9236	0.9904	0.970177	0.204981
D3ZK73	Cullin 4B OS=Rattus norvegicus GN=Cul4b PE=1 SV=1	4	1	1.01491	1.03816	0.998705	1.02158	1.01834	0.0658651
P13638	Sodium/potassium-transporting ATPase subunit beta-2 OS=Rattus norvegicus GN=Atp1b2 PE=2 SV=1	2	2	0.909698	0.972909	0.749838	0.801942	0.858597	0.0313754
B1H2A6	FMR1 autosomal homolog 2 OS=Rattus norvegicus GN=Fxr2 PE=1 SV=1	6	3	0.934301	0.972189	1	1.04055	0.98676	0.576429
A0A0H2UHS8	FXYD domain-containing ion transport regulator OS=Rattus norvegicus GN=Fxyd1 PE=1 SV=1	1	1	0.902297	0.918645	0.78683	0.801086	0.852214	0.00478974
Q6P7R8	Very-long-chain 3-oxoacyl-CoA reductase OS=Rattus norvegicus GN=Hsd17b12 PE=2 SV=1	3	3	1.05697	0.916135	1.08112	0.937063	0.997823	0.959989
A0A0G2QC15	HIV-1 Tat interactive protein 2 OS=Rattus norvegicus GN=Htatip2 PE=1 SV=1	3	3	1.07159	0.951501	1.10476	0.980952	1.0272	0.482545
F1LZJ4	Putative hydroxypyruvate isomerase OS=Rattus norvegicus GN=Hyi PE=1 SV=2	3	3	0.88079	1.12415	0.895062	1.14236	1.01059	0.886287
P41565	Isocitrate dehydrogenase [NAD] subunit gamma 1, mitochondrial OS=Rattus norvegicus GN=Idh3g PE=1 SV=2	3	3	0.948121	0.981209	0.948508	0.98161	0.964862	0.0103593
Q9JMB3	Erythrocyte membrane protein band 4.1-like 3 OS=Rattus norvegicus GN=Epb41l3 PE=1 SV=1	9	7	0.94696	1.08405	0.905933	1.03708	0.993505	0.878615
Q5M9F7	ARP10 actin-related protein 10 homolog (S. cerevisiae) OS=Rattus norvegicus GN=Actr10 PE=1 SV=1	7	7	0.980981	0.969146	0.901009	0.89014	0.935319	0.0315601
P57113	Maleylacetoacetate isomerase OS=Rattus norvegicus GN=Gstz1 PE=1 SV=2	3	3	0.965919	1.02702	0.981005	1.04306	1.00425	0.824444
D3ZEJ9	Similar to Protein Njmu-R1 OS=Rattus norvegicus GN=RGD1310429 PE=1 SV=2	3	3	1.06995	1.11551	0.980185	1.02192	1.04689	0.160822
Q5FVJ7	Intraflagellar transport protein 22 homolog OS=Rattus norvegicus GN=Ift22 PE=2 SV=1	2	2	1.00172	0.94789	0.952888	0.90168	0.951045	0.0537424
G3V6K1	Transcobalamin 2, isoform CRA_a OS=Rattus norvegicus GN=Tcn2 PE=4 SV=1	3	3	0.804844	0.864706	0.823363	0.884602	0.844379	0.000146481
A0A0G2KA95	Neural cell adhesion molecule L1 OS=Rattus norvegicus GN=L1cam PE=1 SV=1	4	4	1.08874	1.1518	0.892761	0.944466	1.01944	0.759015
D3ZQ77	Similar to HTGN29 protein; keratinocytes associated transmembrane protein 2, isoform CRA_a OS=Rattus norvegicus GN=RGD1310352 PE=1 SV=1	2	2	1.06094	1.0905	1.12705	1.15845	1.10923	0.00214013
A0A0G2K051	Early endosome antigen 1 OS=Rattus norvegicus GN=Eea1 PE=1 SV=1	7	7	1.00474	0.954369	1.10094	1.04575	1.02645	0.427347
P11608	ATP synthase protein 8 OS=Rattus norvegicus GN=Mt-atp8 PE=1 SV=2	1	1	1.04055	0.940285	1.10821	1.00142	1.02262	0.54436
E9PTX9	Solute carrier family 12 member 2 OS=Rattus norvegicus GN=Slc12a2 PE=1 SV=1	2	2	0.938907	1.08682	0.954638	1.10503	1.02135	0.639796
Q497C3	Methyltransferase-like 26 OS=Rattus norvegicus GN=Mettl26 PE=2 SV=2	3	3	1.06957	0.982609	1.04611	0.961056	1.01483	0.584289
P30919	N(4)-(Beta-N-acetylglucosaminyl)-L-asparaginase OS=Rattus norvegicus GN=Aga PE=1 SV=2	2	2	0.927013	0.963903	0.984414	1.02359	0.97473	0.256575
F2Z3T0	Parafibromin OS=Rattus norvegicus GN=Cdc73 PE=1 SV=1	6	6	0.91491	0.976581	0.94288	1.00644	0.960202	0.092576
G3V702	Smu-1 suppressor of mec-8 and unc-52 homolog (C. elegans) OS=Rattus norvegicus GN=Smu1 PE=1 SV=1	4	4	0.911947	0.930954	0.998301	1.01911	0.965078	0.225217
F1LMD9	Cyclin-G-associated kinase OS=Rattus norvegicus GN=Gak PE=1 SV=1	6	5	0.999575	0.931577	0.9683	0.902429	0.95047	0.0581502
F1LNF3	Nuclear transcription factor, X-box-binding-like 1 OS=Rattus norvegicus GN=Nfxl1 PE=1 SV=1	2	2	1.04302	1.14235	0.938922	1.02834	1.03816	0.394991
B4F7E8	Niban-like protein 1 OS=Rattus norvegicus GN=Fam129b PE=1 SV=1	4	4	0.946314	1.0645	0.872875	0.981892	0.966396	0.430933
P68182	cAMP-dependent protein kinase catalytic subunit beta OS=Rattus norvegicus GN=Prkacb PE=1 SV=2	5	2	0.988712	1.06062	0.997469	1.07001	1.0292	0.213983
Q3MQ06	Autophagy protein 5 OS=Rattus norvegicus GN=Atg5 PE=2 SV=1	2	2	0.941856	0.937873	0.919876	0.915986	0.928898	3.26402e-05
O54772	SWI/SNF-related matrix-associated actin-dependent regulator of chromatin subfamily D member 2 OS=Rattus norvegicus GN=Smarcd2 PE=1 SV=3	5	5	0.931129	1.04486	0.922058	1.03468	0.983184	0.626398
Q6AYF8	RCG43931 OS=Rattus norvegicus GN=Serpinb9 PE=1 SV=1	7	7	0.949078	1.02486	1.03998	1.12302	1.03424	0.374047
A0A0G2K3V4	O-linked N-acetylglucosamine (GlcNAc) transferase (UDP-N-acetylglucosamine:polypeptide-N-acetylglucosaminyl transferase), isoform CRA_a OS=Rattus norvegicus GN=Ogt PE=1 SV=1	4	4	0.96337	1.01262	0.973273	1.02303	0.993072	0.651609
Q75Q41	Mitochondrial import receptor subunit TOM22 homolog OS=Rattus norvegicus GN=Tomm22 PE=1 SV=1	3	3	1.05434	1.098	0.971276	1.01149	1.03378	0.262386
O88794	Pyridoxine-5'-phosphate oxidase OS=Rattus norvegicus GN=Pnpo PE=1 SV=1	1	1	1.00424	1.01272	1.01067	1.01921	1.01171	0.00899133
Q9JHW5	Vesicle-associated membrane protein 7 OS=Rattus norvegicus GN=Vamp7 PE=1 SV=1	2	2	0.980182	1.01363	0.993305	1.0272	1.00358	0.743903
B0BNG0	ER membrane protein complex subunit 2 OS=Rattus norvegicus GN=Emc2 PE=2 SV=1	2	2	0.985501	1.09901	1.0171	1.13425	1.05896	0.139855
Q5XIA5	Coenzyme A synthase OS=Rattus norvegicus GN=Coasy PE=1 SV=1	3	3	0.97903	0.994243	0.935928	0.950472	0.964918	0.0381943
D3ZKP9	Voltage-dependent calcium channel subunit alpha-2/delta-1 OS=Rattus norvegicus GN=Cacna2d1 PE=1 SV=3	14	1	1.01398	0.994917	1.03861	1.01909	1.01665	0.113168
A0A0G2K931	Phosphoserine aminotransferase OS=Rattus norvegicus GN=Psat1 PE=1 SV=1	2	2	1.03055	1.08907	0.986409	1.04242	1.03711	0.129069
Q5XI31	GPI transamidase component PIG-S OS=Rattus norvegicus GN=Pigs PE=2 SV=3	4	4	1.03274	1.02671	1.03676	1.03071	1.03173	5.20118e-06
A0A0G2JTX2	PRA1 family protein OS=Rattus norvegicus GN=Praf2 PE=1 SV=1	1	1	1.07706	1.02285	1.13557	1.07841	1.07847	0.0143232
M0R9R0	G-protein coupled receptor-associated sorting protein 1 OS=Rattus norvegicus GN=Gprasp1 PE=1 SV=1	6	6	0.86271	1.0379	0.863327	1.03864	0.950644	0.366943
D4ACM1	Elongator complex protein 3 OS=Rattus norvegicus GN=Elp3 PE=1 SV=2	5	5	0.896027	1.03491	0.710751	0.820913	0.865649	0.0957675
Q68FX7	THO complex subunit 5 homolog OS=Rattus norvegicus GN=Thoc5 PE=2 SV=1	1	1	0.972647	1.05833	0.971474	1.05705	1.01487	0.569397
B6DYQ9	Glutathione S-transferase theta 2 OS=Rattus norvegicus GN=Gstt2 PE=2 SV=1	4	4	0.877625	1.00507	0.86202	0.987198	0.932978	0.118276
A0A0G2K9M5	TBC1 domain family member 8B OS=Rattus norvegicus GN=Tbc1d8b PE=1 SV=1	2	2	0.940287	1.05855	1.01	1.13703	1.03646	0.412144
B2RZ37	Receptor expression-enhancing protein 5 OS=Rattus norvegicus GN=Reep5 PE=1 SV=1	2	2	0.934515	1.02273	0.959652	1.05024	0.991783	0.770368
Q5U2Z5	Cap-specific mRNA (nucleoside-2'-O-)-methyltransferase 1 OS=Rattus norvegicus GN=Cmtr1 PE=1 SV=1	5	5	0.995497	1.04011	1.02486	1.0708	1.03282	0.0813177
M0RC17	Cell adhesion molecule L1-like OS=Rattus norvegicus GN=Chl1 PE=1 SV=2	3	3	1.04464	0.958798	1.04869	0.962516	1.00366	0.887777
Q499V1	Uridine phosphorylase OS=Rattus norvegicus GN=Upp1 PE=1 SV=1	2	2	1.02787	1.0549	0.989029	1.01503	1.02171	0.164143
A0A0G2K2P6	HBS1-like protein OS=Rattus norvegicus GN=Hbs1l PE=1 SV=1	3	3	0.987024	1.04785	0.951897	1.01056	0.999333	0.974676
P02767	Transthyretin OS=Rattus norvegicus GN=Ttr PE=1 SV=1	3	3	0.837866	0.997246	0.750077	0.892758	0.869487	0.0451313
Q5M7W5	Microtubule-associated protein 4 OS=Rattus norvegicus GN=Map4 PE=1 SV=1	20	1	0.99105	0.989015	1.06842	1.06623	1.02868	0.246216
G3V829	Far upstream element-binding protein 3 OS=Rattus norvegicus GN=Fubp3 PE=1 SV=1	5	4	1.11574	0.963403	1.04813	0.905028	1.00807	0.867505
Q3ZB99	Tight junction protein 2 OS=Rattus norvegicus GN=Tjp2 PE=1 SV=1	4	4	1.13529	1.09019	1.09458	1.0511	1.09279	0.00167712
Q32PZ3	Protein unc-45 homolog A OS=Rattus norvegicus GN=Unc45a PE=2 SV=1	8	8	0.905786	0.948813	0.930286	0.974476	0.93984	0.00606311
Q99MZ4	Glutathione hydrolase 7 OS=Rattus norvegicus GN=Ggt7 PE=1 SV=2	3	3	0.955043	1.1251	0.900811	1.06121	1.01054	0.8421
M0RDJ3	Interferon-induced, double-stranded RNA-activated protein kinase OS=Rattus norvegicus GN=Eif2ak2 PE=1 SV=2	2	2	0.950368	1.07871	0.969158	1.10004	1.02457	0.540427
B2RYD7	RCG25591, isoform CRA_a OS=Rattus norvegicus GN=Stt3b PE=1 SV=1	6	6	1.14186	1.10047	1.03456	0.99705	1.06848	0.0795551
Q765A7	GPI inositol-deacylase OS=Rattus norvegicus GN=Pgap1 PE=1 SV=1	6	6	0.996756	0.990268	0.949035	0.942857	0.969729	0.0715388
B0BNM6	LOC683402 protein OS=Rattus norvegicus GN=Ap3s2 PE=2 SV=1	2	2	1.02669	0.921601	0.989152	0.887907	0.956337	0.21517
F1M446	Similar to KIAA0368 OS=Rattus norvegicus GN=RGD1306148 PE=1 SV=3	12	12	0.960968	1.00156	0.97505	1.01624	0.988454	0.39175
F1LN42	Tensin 1 OS=Rattus norvegicus GN=Tns1 PE=1 SV=2	5	5	0.887649	0.915016	0.849414	0.875603	0.88192	0.0001297
A0A0G2JTB2	1,4-alpha-glucan branching enzyme 1 OS=Rattus norvegicus GN=Gbe1 PE=1 SV=1	3	3	0.918769	0.996291	0.993582	1.07742	0.996515	0.917843
Q5U2R0	Methionine adenosyltransferase 2 subunit beta OS=Rattus norvegicus GN=Mat2b PE=2 SV=1	2	2	1.14451	1.0374	1.19412	1.08237	1.1146	0.0158196
Q68G11	Casein kinase II subunit beta OS=Rattus norvegicus GN=Csnk2b PE=1 SV=2	2	2	0.93975	0.874574	0.986083	0.917694	0.929525	0.0228989
O54922	Exocyst complex component 7 OS=Rattus norvegicus GN=Exoc7 PE=1 SV=1	2	2	0.993988	1.09659	0.974077	1.07463	1.03482	0.288988
Q5EAN5	Secretory carrier-associated membrane protein OS=Rattus norvegicus GN=Scamp4 PE=1 SV=1	1	1	0.98297	1.01386	0.965383	0.995722	0.989484	0.343726
P70470	Acyl-protein thioesterase 1 OS=Rattus norvegicus GN=Lypla1 PE=1 SV=1	3	3	0.9662	0.975136	0.959121	0.967991	0.967112	5.79877e-05
Q03555-3	Isoform 2 of Gephyrin OS=Rattus norvegicus GN=Gphn	7	7	0.973015	1.10755	0.963967	1.09725	1.03544	0.395695
Q62824	Exocyst complex component 4 OS=Rattus norvegicus GN=Exoc4 PE=1 SV=1	3	3	1.05905	1.02379	1.04179	1.0071	1.03293	0.0261281
Q7TP07	Da1-12 OS=Rattus norvegicus GN=Vps13a PE=2 SV=1	3	3	1.00484	0.928658	0.945034	0.873389	0.937979	0.0616841
D3ZXF9	Mitochondrial ribosomal protein L12 OS=Rattus norvegicus GN=Mrpl12 PE=1 SV=1	2	2	0.951497	0.984464	0.997616	1.03218	0.991439	0.626315
Q3B8Q2	Eukaryotic initiation factor 4A-III OS=Rattus norvegicus GN=Eif4a3 PE=1 SV=1	5	4	0.973633	1.13687	0.947905	1.10683	1.04131	0.415072
Q5XI01	La-related protein 7 OS=Rattus norvegicus GN=Larp7 PE=1 SV=2	4	4	0.966898	0.958045	1.02993	1.0205	0.993843	0.74805
D3ZBS2	Inter-alpha-trypsin inhibitor heavy chain H3 OS=Rattus norvegicus GN=Itih3 PE=1 SV=3	1	1	1.15124	1.05454	0.975534	0.893592	1.01873	0.745336
Q1PBJ1	Lactadherin OS=Rattus norvegicus GN=Mfge8 PE=1 SV=1	3	3	0.959954	1.07399	0.952687	1.06586	1.01312	0.703549
A0A0G2K502	Malic enzyme OS=Rattus norvegicus GN=Me2 PE=1 SV=1	4	3	0.919679	1.05696	0.884791	1.01686	0.969571	0.479441
Q7TP42	Ab2-292 OS=Rattus norvegicus GN=Sec62 PE=1 SV=1	2	2	1.08477	1.02668	1.01571	0.961322	1.02212	0.415623
Q6DKG0	N-alpha-acetyltransferase 35, NatC auxiliary subunit OS=Rattus norvegicus GN=Naa35 PE=1 SV=1	4	4	1.05349	1.06519	0.99057	1.00157	1.02771	0.186033
A0A0G2K191	Tubulin-specific chaperone E OS=Rattus norvegicus GN=Tbce PE=1 SV=1	3	3	0.976034	0.960959	1.0096	0.994002	0.985148	0.21012
G3V762	Tissue specific transplantation antigen P35B (Predicted), isoform CRA_a OS=Rattus norvegicus GN=Tsta3 PE=1 SV=1	3	3	1.02383	0.949111	1.00118	0.92812	0.975561	0.313997
G3V6R4	Leucine-rich repeat-containing 1 OS=Rattus norvegicus GN=Lrrc1 PE=4 SV=1	6	5	0.966451	1.02859	0.963146	1.02508	0.995816	0.823316
P10683	Galanin peptides OS=Rattus norvegicus GN=Gal PE=1 SV=1	2	2	0.813261	0.959001	0.942815	1.11177	0.956712	0.505325
F1LRK0	Clathrin coat assembly protein AP180 OS=Rattus norvegicus GN=Snap91 PE=1 SV=3	4	3	1.00594	1.04592	0.950262	0.988033	0.997539	0.905461
Q45QK6	Guanine nucleotide-binding protein subunit gamma (Fragment) OS=Rattus norvegicus GN=Gng2 PE=2 SV=1	1	1	1.05828	1.2373	0.917027	1.07215	1.07119	0.318999
M0R6E6	Scaffold attachment factor B2 OS=Rattus norvegicus GN=Safb2 PE=1 SV=2	5	2	0.925737	1.01711	0.998038	1.09655	1.00936	0.798691
G3V637	Syntaxin binding protein 2, isoform CRA_b OS=Rattus norvegicus GN=Stxbp2 PE=1 SV=1	2	2	1.04729	1.01891	1.05422	1.02566	1.03652	0.00497552
A0A0G2JWG1	Alpha-mannosidase OS=Rattus norvegicus GN=Man2a2 PE=3 SV=1	7	7	1.00948	0.950217	0.978927	0.921456	0.965021	0.113696
A0A140TA98	Metastasis-associated protein MTA1 OS=Rattus norvegicus GN=Mta1 PE=1 SV=1	4	1	1.04622	0.993456	1.07932	1.02489	1.03597	0.0935002
F1LSQ0	FAS-associated factor 1 OS=Rattus norvegicus GN=Faf1 PE=1 SV=3	6	6	0.960571	1.003	0.975963	1.01908	0.989654	0.461561
F1MA87	Cyclin-dependent kinase 6 OS=Rattus norvegicus GN=Cdk6 PE=1 SV=2	3	3	0.913929	1.04643	0.958427	1.09738	1.00404	0.925684
Q38PG1	AHNAK 1 (Fragment) OS=Rattus norvegicus PE=2 SV=1	8	2	1.01024	0.915354	1.03887	0.941296	0.976438	0.445695
D4A7X5	Protein phosphatase 1K (PP2C domain containing) (Predicted) OS=Rattus norvegicus GN=Ppm1k PE=1 SV=1	2	2	1.04055	1.06285	1.00313	1.02463	1.03279	0.040734
Q8VIL3	ZW10 interactor OS=Rattus norvegicus GN=Zwint PE=1 SV=1	3	3	1.02762	1.21337	0.923381	1.09029	1.06367	0.334066
B1H223	Down syndrome critical region gene 3 OS=Rattus norvegicus GN=Dscr3 PE=2 SV=1	3	3	0.900771	1.02139	0.887699	1.00657	0.954106	0.23535
Q4QQT4	Serine/threonine-protein phosphatase 2A 65 kDa regulatory subunit A beta isoform OS=Rattus norvegicus GN=Ppp2r1b PE=2 SV=1	5	1	1.00078	1.01166	1.06452	1.0761	1.03826	0.0877808
G3V7Z3	Nucleolar protein 3 OS=Rattus norvegicus GN=Nol3 PE=1 SV=1	2	2	0.997678	0.948916	1	0.951125	0.97443	0.119862
P70581	Nucleoporin p58/p45 OS=Rattus norvegicus GN=Nup58 PE=1 SV=1	3	3	0.958395	0.940193	0.980243	0.961626	0.960114	0.00281445
B5DF89	Cullin-3 OS=Rattus norvegicus GN=Cul3 PE=1 SV=2	11	10	0.863454	1.01439	0.921758	1.08289	0.970622	0.567984
A0A0G2K2Z0	Echinoderm microtubule-associated protein-like 4 OS=Rattus norvegicus GN=Eml4 PE=1 SV=1	5	5	0.981369	1.08669	0.981369	1.08669	1.03403	0.305822
Q5RK30	Ribosome maturation protein SBDS OS=Rattus norvegicus GN=Sbds PE=2 SV=1	4	4	1.00662	0.970806	1.00116	0.965544	0.986032	0.228822
F1MA18	Y-box-binding protein 3 OS=Rattus norvegicus GN=Ybx3 PE=1 SV=1	2	1	1.0177	1.00551	0.965659	0.954087	0.985739	0.387926
Q6MGC4	H2-K region expressed gene 2, rat orthologue OS=Rattus norvegicus GN=Pfdn6 PE=1 SV=1	3	3	0.893214	0.90906	0.91983	0.936148	0.914563	7.96254e-05
Q9Z1B2	Glutathione S-transferase Mu 5 OS=Rattus norvegicus GN=Gstm5 PE=1 SV=3	3	2	0.909187	1.04944	0.869842	1.00403	0.958123	0.351528
D4A1H2	Phosphatidylinositol-specific phospholipase C, X domain-containing 3 OS=Rattus norvegicus GN=Plcxd3 PE=4 SV=1	1	1	1.225	1.13113	1.10699	1.02217	1.12132	0.027041
Q6PEC1	Tubulin-specific chaperone A OS=Rattus norvegicus GN=Tbca PE=1 SV=1	2	2	1.05655	0.958096	1.08616	0.984944	1.02144	0.501068
A0A0G2JWD6	AP-3 complex subunit beta OS=Rattus norvegicus GN=Ap3b1 PE=1 SV=1	5	4	0.885335	0.961211	0.966927	1.0498	0.965817	0.348321
D3ZHA0	Filamin-C OS=Rattus norvegicus GN=Flnc PE=1 SV=1	11	4	0.964418	0.984062	0.862446	0.880013	0.922735	0.0430929
Q9WU06	Advillin OS=Rattus norvegicus GN=Avil PE=2 SV=1	2	2	1.22196	0.962459	1.32384	1.0427	1.13774	0.145642
D4A0C3	HID1 domain-containing OS=Rattus norvegicus GN=Hid1 PE=1 SV=2	5	5	1.09408	1.01512	1.08859	1.01003	1.05195	0.0628023
Q6P7P5	Basic leucine zipper and W2 domain-containing protein 1 OS=Rattus norvegicus GN=Bzw1 PE=1 SV=1	4	4	0.965888	0.986281	1.0598	1.08218	1.02354	0.434089
P61212	ADP-ribosylation factor-like protein 1 OS=Rattus norvegicus GN=Arl1 PE=1 SV=1	3	3	1.08493	1.01582	0.950401	0.889861	0.985253	0.737593
D3ZL21	Similar to TP53-regulating kinase (p53-related protein kinase) (Nori-2) OS=Rattus norvegicus GN=LOC685619 PE=4 SV=3	3	3	0.752235	0.855206	0.841562	0.95676	0.851441	0.0121103
Q5FVF3	Golgi-associated, gamma adaptin ear-containing, ARF-binding protein 1 OS=Rattus norvegicus GN=Gga1 PE=1 SV=1	3	2	1.07765	0.805039	1.25012	0.933876	1.01667	0.867402
Q641Z8	Peflin OS=Rattus norvegicus GN=Pef1 PE=2 SV=1	4	4	0.961312	0.984893	1.0623	1.08836	1.02421	0.455643
P62138	Serine/threonine-protein phosphatase PP1-alpha catalytic subunit OS=Rattus norvegicus GN=Ppp1ca PE=1 SV=1	6	1	1.00653	1.06188	0.95029	1.00254	1.00531	0.823563
P18265	Glycogen synthase kinase-3 alpha OS=Rattus norvegicus GN=Gsk3a PE=1 SV=1	4	2	0.921562	0.962364	0.998095	1.04229	0.981077	0.489378
D3ZKG5	Parvin, beta OS=Rattus norvegicus GN=Parvb PE=1 SV=1	3	2	0.862693	0.916694	0.958653	1.01866	0.939175	0.114696
D4ACV0	Negative elongation factor complex member B OS=Rattus norvegicus GN=Nelfb PE=1 SV=1	3	3	0.924322	1.02816	0.976208	1.08587	1.00364	0.919741
P97521	Mitochondrial carnitine/acylcarnitine carrier protein OS=Rattus norvegicus GN=Slc25a20 PE=1 SV=1	4	4	0.946686	1.11671	0.935564	1.1036	1.02564	0.618989
D4A3E3	AT-rich interaction domain 1A OS=Rattus norvegicus GN=Arid1a PE=1 SV=3	3	3	1.08405	1.12567	1.07961	1.12105	1.1026	0.000144447
D4AE49	Ski2-like RNA helicase 2 OS=Rattus norvegicus GN=Skiv2l2 PE=1 SV=3	4	4	0.989505	0.958396	0.946237	0.916487	0.952656	0.0202467
A0A0G2JTK6	Metastasis-associated 1 family, member 3 OS=Rattus norvegicus GN=Mta3 PE=1 SV=1	4	2	1.0562	0.994022	1.01416	0.954458	1.00471	0.831364
Q6TEK3	Vitamin K epoxide reductase complex subunit 1-like protein 1 OS=Rattus norvegicus GN=Vkorc1l1 PE=1 SV=1	1	1	1.13043	1.09676	1.0995	1.06675	1.09836	0.000278301
F1LR42	RUN and FYVE domain-containing 1 OS=Rattus norvegicus GN=Rufy1 PE=1 SV=1	3	3	0.895714	0.857239	0.930575	0.890603	0.893533	0.000393796
Q9QYU2	Elongation factor Ts, mitochondrial OS=Rattus norvegicus GN=Tsfm PE=2 SV=1	3	3	0.979727	1.06708	0.895553	0.975404	0.979442	0.578814
B2RYP3	Fam91a1 protein OS=Rattus norvegicus GN=Fam91a1 PE=1 SV=1	4	4	0.972953	1.05775	1.01914	1.10796	1.03945	0.217944
D3ZCJ3	Major facilitator superfamily domain-containing 6 OS=Rattus norvegicus GN=Mfsd6 PE=1 SV=1	3	3	0.925078	1.02948	0.909618	1.01228	0.969114	0.346756
A0A0G2JU45	tRNA (guanine(37)-N1)-methyltransferase OS=Rattus norvegicus GN=Trmt5 PE=1 SV=1	3	3	0.866277	0.918208	0.855997	0.907312	0.886949	0.00030561
B0BNE6	NADH dehydrogenase (Ubiquinone) Fe-S protein 8 (Predicted), isoform CRA_a OS=Rattus norvegicus GN=Ndufs8 PE=1 SV=1	3	3	0.955309	0.988917	1.00489	1.04024	0.997339	0.885049
Q9JHB5	Translin-associated protein X OS=Rattus norvegicus GN=Tsnax PE=1 SV=1	6	6	0.953314	0.912687	1.09452	1.04787	1.0021	0.961644
P18437	Non-histone chromosomal protein HMG-17 OS=Rattus norvegicus GN=Hmgn2 PE=1 SV=2	1	1	1.09803	1.0283	1.00375	0.940007	1.01752	0.610849
A0A1B0GWW0	Ubiquitin protein ligase E3C (Fragment) OS=Rattus norvegicus GN=Ube3c PE=1 SV=1	4	1	1.01477	1.03864	1.06099	1.08594	1.05008	0.0166329
Q5BK63	NADH dehydrogenase [ubiquinone] 1 alpha subcomplex subunit 9, mitochondrial OS=Rattus norvegicus GN=Ndufa9 PE=1 SV=2	3	3	0.933821	1.01498	0.915329	0.994879	0.964752	0.190006
Q02563	Synaptic vesicle glycoprotein 2A OS=Rattus norvegicus GN=Sv2a PE=1 SV=2	4	4	0.934329	0.948923	0.981387	0.996715	0.965339	0.0522571
P50408	V-type proton ATPase subunit F OS=Rattus norvegicus GN=Atp6v1f PE=1 SV=1	1	1	0.950565	1.09781	0.963493	1.11274	1.03115	0.495892
D3ZAI4	O-acyltransferase-like OS=Rattus norvegicus GN=Oacyl PE=4 SV=1	2	2	0.990799	1.10158	0.856507	0.952275	0.975291	0.643208
D3ZGK7	Carboxylic ester hydrolase OS=Rattus norvegicus GN=Ces1c PE=1 SV=3	5	5	0.92108	0.866758	0.851817	0.80158	0.860308	0.00128233
A0A0G2KAW5	WD repeat domain 48 OS=Rattus norvegicus GN=Wdr48 PE=1 SV=1	3	3	0.963267	1.14016	1.00372	1.18803	1.07379	0.218378
Q6DGG9	Calcium signal-modulating cyclophilin ligand OS=Rattus norvegicus GN=Camlg PE=1 SV=1	1	1	1.0729	0.979794	1.0112	0.92345	0.996837	0.922502
A0A0G2K6F9	Cleavage stimulation factor subunit 2 OS=Rattus norvegicus GN=Cstf2 PE=1 SV=1	3	3	0.983666	0.945554	0.999631	0.9609	0.972438	0.0609971
D3ZRE7	SWAP complex protein (Predicted), isoform CRA_b OS=Rattus norvegicus GN=Swap70 PE=1 SV=1	2	2	0.998158	1.007	0.956583	0.965055	0.981699	0.187684
D3ZJF9	Galactosidase, alpha OS=Rattus norvegicus GN=Gla PE=1 SV=2	3	3	0.919919	0.935528	0.902463	0.917776	0.918921	2.04288e-05
D3Z9E6	Cleavage and polyadenylation specific factor 2 (Predicted) OS=Rattus norvegicus GN=Cpsf2 PE=1 SV=1	3	3	0.988699	1.02588	0.950912	0.986676	0.988043	0.464498
A0A0G2K110	Eukaryotic translation initiation factor 6 OS=Rattus norvegicus GN=Eif6 PE=1 SV=1	4	4	0.962057	1.10248	0.915935	1.04963	1.00753	0.863938
D3ZSB7	Ribosomal protein S6 kinase OS=Rattus norvegicus GN=Rps6ka4 PE=1 SV=2	4	4	0.980505	0.994946	1.07607	1.09192	1.03586	0.249566
A0A0G2K7Y0	Complement component receptor 1-like protein OS=Rattus norvegicus GN=Cr1l PE=1 SV=1	3	3	0.974175	0.932568	0.98086	0.938967	0.956642	0.012012
D4A3G2	Cyclin-dependent kinase 11B OS=Rattus norvegicus GN=Cdk11b PE=1 SV=3	6	6	1.10402	0.987403	0.957364	0.856237	0.976257	0.657946
Q03346	Mitochondrial-processing peptidase subunit beta OS=Rattus norvegicus GN=Pmpcb PE=1 SV=3	8	7	1.07726	0.982964	1.04657	0.954965	1.01544	0.603024
M0RA39	Matrix-remodeling-associated 7 OS=Rattus norvegicus GN=Mxra7 PE=1 SV=1	1	1	1.54195	1.42234	1.09677	1.01169	1.26819	0.0793822
F1LR10	Epithelial protein lost in neoplasm OS=Rattus norvegicus GN=Lima1 PE=1 SV=2	3	3	1.02371	1.14302	1.01606	1.13448	1.07932	0.0605772
A0A0G2JYE0	Ataxin 2-like OS=Rattus norvegicus GN=Atxn2l PE=1 SV=1	1	1	1.45333	1.05387	1.12464	0.815518	1.11184	0.428148
P09811	Glycogen phosphorylase, liver form OS=Rattus norvegicus GN=Pygl PE=1 SV=5	3	2	0.938038	0.967642	0.905616	0.934197	0.936373	0.00241485
D4A7Z2	Ribosomal protein L37 OS=Rattus norvegicus GN=LOC100360654 PE=3 SV=2	1	1	1.10588	0.941988	1.18316	1.00781	1.05971	0.304342
Q5U2U7	mRNA cap guanine-N7 methyltransferase OS=Rattus norvegicus GN=Rnmt PE=1 SV=1	3	3	0.913218	0.988318	0.944099	1.02174	0.966843	0.215069
D4A3X6	Phospholipid-transporting ATPase OS=Rattus norvegicus GN=Atp8a2 PE=1 SV=3	5	4	0.991673	1.03657	0.864583	0.903725	0.949137	0.244644
G3V6S3	Calumenin OS=Rattus norvegicus GN=Calu PE=1 SV=1	4	4	0.96243	0.958567	0.986681	0.982721	0.9726	0.00825132
B0BNE5	S-formylglutathione hydrolase OS=Rattus norvegicus GN=Esd PE=2 SV=1	3	3	0.884268	1.39877	0.870517	1.37702	1.13265	0.403034
A0A0G2JVW3	Ankyrin repeat domain 17 OS=Rattus norvegicus GN=Ankrd17 PE=1 SV=1	4	1	1.01291	1.00553	1.00697	0.999633	1.00626	0.0613674
Q5U2U4	Secretory carrier-associated membrane protein OS=Rattus norvegicus GN=Scamp2 PE=1 SV=1	2	2	0.971348	1.09869	0.954466	1.0796	1.02603	0.50608
F7DLY1	EPS8-like 2 OS=Rattus norvegicus GN=Eps8l2 PE=1 SV=2	5	5	0.891269	0.91691	0.95248	0.979882	0.935135	0.0158526
B2RZ22	Paip1 protein (Fragment) OS=Rattus norvegicus GN=Paip1 PE=2 SV=1	2	2	1.00439	1.00366	1.03348	1.03273	1.01856	0.0691105
B2RZ72	Actin-related protein 2/3 complex subunit 4 OS=Rattus norvegicus GN=Arpc4 PE=1 SV=1	3	3	0.926163	1.02495	1.01067	1.11847	1.02006	0.628647
Q6BBI8	Ubiquitin-fold modifier-conjugating enzyme 1 OS=Rattus norvegicus GN=Ufc1 PE=2 SV=1	1	1	0.994937	1.02604	1.03733	1.06976	1.03202	0.0835803
D3ZJK8	ATPase phospholipid transporting 8A1 OS=Rattus norvegicus GN=Atp8a1 PE=1 SV=3	2	2	0.946011	1.03783	0.910927	0.999338	0.973526	0.382515
Q5PPM8	Type 1 phosphatidylinositol 4,5-bisphosphate 4-phosphatase OS=Rattus norvegicus GN=Pip4p1 PE=1 SV=1	2	2	0.950034	1.02033	0.946447	1.01648	0.983323	0.442383
B0LT89	Serine/threonine-protein kinase 24 OS=Rattus norvegicus GN=Stk24 PE=2 SV=1	4	2	1.01804	0.93704	1.03172	0.949627	0.984106	0.529822
Q01177	Plasminogen OS=Rattus norvegicus GN=Plg PE=2 SV=2	4	4	1.02903	1.05545	0.86977	0.892104	0.961589	0.445901
Q68FQ7	RNA polymerase II-associated protein 3 OS=Rattus norvegicus GN=Rpap3 PE=1 SV=1	3	3	0.986448	1.03531	0.95544	1.00276	0.99499	0.773507
A0A0G2K2P5	Tight junction protein 1 OS=Rattus norvegicus GN=Tjp1 PE=1 SV=1	7	7	0.876543	0.950301	0.805176	0.872928	0.876237	0.0058473
D3ZF11	Hepatitis B virus x interacting protein (Predicted), isoform CRA_a OS=Rattus norvegicus GN=Lamtor5 PE=1 SV=1	3	3	0.90526	0.870631	0.955188	0.918649	0.912432	0.00242717
D3ZVR9	Phosphoglucomutase 5 OS=Rattus norvegicus GN=Pgm5 PE=1 SV=3	5	5	0.883647	1.03762	0.841275	0.98786	0.937599	0.218301
D3ZIF0	Zinc finger protein 512 OS=Rattus norvegicus GN=Zfp512 PE=1 SV=1	3	3	1.26192	1.00908	1.19467	0.955307	1.10524	0.200463
D3ZHV7	Serine dehydratase-like OS=Rattus norvegicus GN=Sdsl PE=1 SV=3	2	2	0.954998	0.900034	0.959945	0.904696	0.929918	0.00462386
P52287	Guanine nucleotide-binding protein G(I)/G(S)/G(T) subunit beta-3 OS=Rattus norvegicus GN=Gnb3 PE=1 SV=1	7	4	1.11107	1.0859	1.05182	1.02799	1.06919	0.00923878
P12346	Serotransferrin OS=Rattus norvegicus GN=Tf PE=1 SV=3	23	1	1.16646	1.10273	0.839469	0.793603	0.975564	0.801948
Q32PY7	Nudcd3 protein OS=Rattus norvegicus GN=Nudcd3 PE=2 SV=1	3	3	1.01421	1.01494	0.970711	0.971409	0.992816	0.588182
G3V6C4	UDP-glucose 6-dehydrogenase OS=Rattus norvegicus GN=Ugdh PE=1 SV=1	3	3	0.951844	0.94194	0.970066	0.959972	0.955956	0.000319826
F1LXF5	Golgi to ER traffic protein 4 OS=Rattus norvegicus GN=Get4 PE=1 SV=2	3	3	0.966724	0.902253	1.05564	0.985238	0.977464	0.501857
G3V6R5	Sulfite oxidase OS=Rattus norvegicus GN=Suox PE=1 SV=1	4	4	1.13398	1.07633	1.04607	0.992884	1.06232	0.0788258
P15337	Cyclic AMP-responsive element-binding protein 1 OS=Rattus norvegicus GN=Creb1 PE=1 SV=1	2	2	1.0275	1.14411	0.943117	1.05015	1.04122	0.35689
A0A140TAH1	Hepatocyte growth factor-regulated tyrosine kinase substrate OS=Rattus norvegicus GN=Hgs PE=1 SV=1	6	6	0.995046	1.10793	0.873021	0.972058	0.987013	0.7967
A0A0G2K2D4	ArfGAP with GTPase domain, ankyrin repeat and PH domain 3 OS=Rattus norvegicus GN=Agap3 PE=4 SV=1	3	3	0.967686	0.959092	1.07731	1.06774	1.01796	0.590651
A0A0G2K4D9	Stromal antigen 2 OS=Rattus norvegicus GN=Stag2 PE=1 SV=1	5	5	0.964714	1.02569	0.911032	0.968619	0.967515	0.214815
A0A0G2JTH6	EH domain-containing protein 3 OS=Rattus norvegicus GN=Ehd3 PE=1 SV=1	5	1	0.989807	0.972935	0.871018	0.856171	0.922483	0.064592
D4A9N5	Tripartite motif-containing 25 OS=Rattus norvegicus GN=Trim25 PE=1 SV=3	4	4	1.06904	1.01821	1.10121	1.04885	1.05933	0.0144579
Q8CJB9	E3 ubiquitin-protein ligase BRE1B OS=Rattus norvegicus GN=Rnf40 PE=1 SV=1	6	5	1.01182	0.967395	1.07869	1.03132	1.02231	0.370873
A0A0G2K824	Mannose-1-phosphate guanyltransferase alpha OS=Rattus norvegicus GN=Gmppa PE=1 SV=1	4	4	1.02689	0.987645	1.07616	1.03503	1.03143	0.133957
F1LUE2	Calcium/calmodulin-dependent protein kinase II, beta, isoform CRA_c OS=Rattus norvegicus GN=Camk2b PE=1 SV=2	4	2	0.981957	0.936155	0.955436	0.910871	0.946105	0.0115802
D4A3S8	NOL1/NOP2/Sun domain family, member 2 (Predicted) OS=Rattus norvegicus GN=Nsun2 PE=1 SV=1	4	4	0.946208	1.03408	0.961303	1.05058	0.998042	0.942357
P48508	Glutamate--cysteine ligase regulatory subunit OS=Rattus norvegicus GN=Gclm PE=1 SV=1	3	3	0.978606	1.02243	0.979959	1.02384	1.00121	0.92706
Q3MHT2	Cysteine desulfurase, mitochondrial OS=Rattus norvegicus GN=Nfs1 PE=1 SV=1	6	6	1.0472	1.05678	1.01719	1.0265	1.03692	0.00673706
P85845	Fascin OS=Rattus norvegicus GN=Fscn1 PE=1 SV=2	7	7	1.05405	1.21955	0.973999	1.12692	1.09363	0.12369
Q5PQN0	Neurocalcin-delta OS=Rattus norvegicus GN=Ncald PE=1 SV=3	3	2	0.96185	0.989872	0.960877	0.98887	0.975367	0.0226622
A0A0G2JU77	Eukaryotic translation initiation factor 3 subunit K OS=Rattus norvegicus GN=Eif3k PE=1 SV=1	2	2	0.979389	0.936104	1.03372	0.988035	0.984312	0.462783
P17046	Lysosome-associated membrane glycoprotein 2 OS=Rattus norvegicus GN=Lamp2 PE=1 SV=3	3	3	1.10374	0.988045	1.02802	0.920259	1.01002	0.802698
A0A0G2K5N6	Rho-associated protein kinase OS=Rattus norvegicus GN=Rock2 PE=1 SV=1	4	3	0.983511	0.991412	0.998953	1.00698	0.995214	0.378195
Q5PQM2	Kinesin light chain 4 OS=Rattus norvegicus GN=Klc4 PE=1 SV=1	4	3	0.913557	0.927911	0.998257	1.01394	0.963417	0.194049
B2RZ38	Ras-related GTP binding D (Predicted), isoform CRA_b OS=Rattus norvegicus GN=Rragd PE=1 SV=1	3	1	0.978818	1.01025	0.994792	1.02674	1.00265	0.805237
P62744	AP-2 complex subunit sigma OS=Rattus norvegicus GN=Ap2s1 PE=1 SV=1	2	2	1.0021	1.10003	0.969871	1.06466	1.03417	0.290551
B2RYS0	Cox7a2 protein OS=Rattus norvegicus GN=Cox7a2 PE=2 SV=1	1	1	1.1226	0.961222	1.08767	0.931309	1.0257	0.602825
P50411	Protein phosphatase inhibitor 2 OS=Rattus norvegicus GN=Ppp1r2 PE=1 SV=2	3	3	1.02318	1.17404	0.973532	1.11707	1.07195	0.162548
F1M0U5	Neuroblastoma-amplified sequence OS=Rattus norvegicus GN=Nbas PE=1 SV=2	7	7	1.01736	1.05703	0.966353	1.00404	1.01119	0.571509
Q7TP52	Carboxymethylenebutenolidase homolog OS=Rattus norvegicus GN=Cmbl PE=2 SV=1	1	1	1.05346	0.952765	1.14257	1.03336	1.04554	0.287017
D3ZT90	Glutaryl-CoA dehydrogenase OS=Rattus norvegicus GN=Gcdh PE=1 SV=1	3	3	0.93805	1.04793	0.967059	1.08034	1.00834	0.811127
Q5FWY5	AH receptor-interacting protein OS=Rattus norvegicus GN=Aip PE=1 SV=1	5	5	1.02967	1.15338	0.935369	1.04774	1.04154	0.388413
B2GV01	Metastasis-associated 1 family, member 2 OS=Rattus norvegicus GN=Mta2 PE=1 SV=1	8	6	0.97036	0.951836	0.962901	0.944519	0.957404	0.000307441
B0BNH1	Gnptg protein OS=Rattus norvegicus GN=Gnptg PE=1 SV=1	2	2	0.923175	0.945903	0.892051	0.914012	0.918785	0.000341236
M0R7M8	Microtubule-associated protein RP/EB family member 2 OS=Rattus norvegicus GN=Mapre2 PE=1 SV=2	3	3	0.999308	1.08965	1.04261	1.13687	1.06711	0.0644566
A0A140UHX6	Spectrin beta chain OS=Rattus norvegicus GN=Sptb PE=1 SV=1	7	3	1.00908	1.06147	0.972073	1.02254	1.01629	0.411334
Q5XIT4	Negative regulator of ubiquitin-like proteins 1 OS=Rattus norvegicus GN=Nub1 PE=2 SV=1	6	6	0.96337	1.00167	0.976705	1.01553	0.989317	0.400335
D4A8T3	Coatomer protein complex, subunit zeta 1 OS=Rattus norvegicus GN=Copz1 PE=1 SV=1	2	2	0.987713	0.984983	1.05275	1.04984	1.01882	0.354622
D3ZGE6	Cortactin, isoform CRA_c OS=Rattus norvegicus GN=Cttn PE=1 SV=3	3	3	1.06829	1.02141	0.963703	0.921412	0.993704	0.85152
D3ZUM2	Sterile alpha and TIR motif containing 1 (Predicted) OS=Rattus norvegicus GN=Sarm1 PE=1 SV=1	4	4	0.891385	1.01631	0.909862	1.03737	0.963732	0.363413
A0A0G2JUR5	Myosin phosphatase Rho-interacting protein OS=Rattus norvegicus GN=Mprip PE=1 SV=1	3	3	1.0045	0.891967	1.10514	0.981333	0.995736	0.925621
P06214	Delta-aminolevulinic acid dehydratase OS=Rattus norvegicus GN=Alad PE=1 SV=1	3	3	1.00346	0.983748	0.998624	0.979009	0.99121	0.183092
A0A0G2JWA3	Exportin 7 OS=Rattus norvegicus GN=Xpo7 PE=1 SV=1	5	5	1.00069	1.05963	0.975798	1.03328	1.01735	0.381188
G3V8T9	Apoptosis regulator BAX OS=Rattus norvegicus GN=Bax PE=1 SV=1	4	4	0.970903	1.05886	0.958402	1.04523	1.00835	0.754554
D4AD37	Inositol monophosphatase 3 OS=Rattus norvegicus GN=Impad1 PE=3 SV=1	3	3	0.997252	1.09035	0.910317	0.995296	0.998303	0.964685
P50904	Ras GTPase-activating protein 1 OS=Rattus norvegicus GN=Rasa1 PE=3 SV=1	4	4	1.15771	1.02987	1.18075	1.05037	1.10467	0.0324568
A0A0G2QC38	Serine and arginine-rich-splicing factor 11 OS=Rattus norvegicus GN=Srsf11 PE=1 SV=1	4	4	1.05938	1.09071	1.02214	1.05237	1.05615	0.00719285
A1A5L1	Bleomycin hydrolase OS=Rattus norvegicus GN=Blmh PE=1 SV=1	3	3	1.0474	0.978815	1.06499	0.995254	1.02161	0.33364
Q6AYN4	Phytanoyl-CoA hydroxylase-interacting protein-like OS=Rattus norvegicus GN=Phyhipl PE=1 SV=2	3	3	0.904025	0.940248	0.898462	0.934462	0.919299	0.000261021
D3ZZX1	Inositol polyphosphate-5-phosphatase A OS=Rattus norvegicus GN=Inpp5a PE=1 SV=1	2	2	1.00828	0.962069	0.966612	0.922314	0.964818	0.0921691
Q498R3	DnaJ homolog subfamily C member 10 OS=Rattus norvegicus GN=Dnajc10 PE=2 SV=2	2	2	1.01913	1.23478	1.01104	1.22498	1.12248	0.0958671
A0A5D0	Cd200 molecule OS=Rattus norvegicus GN=Cd200 PE=2 SV=1	1	1	1.07959	1.09875	0.982233	0.999665	1.04006	0.21423
G3V9R9	Afamin OS=Rattus norvegicus GN=Afm PE=1 SV=1	5	5	1.01802	0.88912	0.847908	0.740548	0.873898	0.0701951
P35446	Spondin-1 OS=Rattus norvegicus GN=Spon1 PE=1 SV=1	1	1	1.03409	1.09701	0.963011	1.0216	1.02893	0.332952
A0A0U1RRT8	Septin 6 OS=Rattus norvegicus GN=Sept6 PE=1 SV=1	8	3	0.973562	0.968275	1.0058	1.00034	0.986996	0.21627
Q5U316	Ras-related protein Rab-35 OS=Rattus norvegicus GN=Rab35 PE=1 SV=1	5	3	1.00102	1.00034	0.982012	0.981346	0.991179	0.159128
D4A899	Vacuolar protein sorting 13 homolog A OS=Rattus norvegicus GN=Vps13a PE=1 SV=2	7	7	0.888253	0.997892	0.941872	1.05813	0.971536	0.465421
D4A582	Zinc finger, DBF-type-containing 2 OS=Rattus norvegicus GN=Zdbf2 PE=4 SV=3	3	3	1.09625	1.04162	1.0547	1.00215	1.04868	0.0459163
Q63014	A-kinase anchor protein 8 OS=Rattus norvegicus GN=Akap8 PE=1 SV=1	4	4	0.914445	0.988221	0.827489	0.89425	0.906101	0.0296325
P61751	ADP-ribosylation factor 4 OS=Rattus norvegicus GN=Arf4 PE=2 SV=2	4	2	0.99831	1.03279	1.01478	1.04983	1.02393	0.0753512
Q7TP57	Signal transducer and activator of transcription OS=Rattus norvegicus GN=Stat4 PE=2 SV=1	9	9	1.0765	1.10055	1.04602	1.06938	1.07311	0.000624543
P01830	Thy-1 membrane glycoprotein OS=Rattus norvegicus GN=Thy1 PE=1 SV=1	2	2	0.911756	0.972848	0.940484	1.0035	0.957147	0.074312
F1LWE6	Musashi RNA-binding protein 2 OS=Rattus norvegicus GN=Msi2 PE=1 SV=3	3	3	0.93161	0.856603	0.966961	0.889107	0.91107	0.0102889
P35213	14-3-3 protein beta/alpha OS=Rattus norvegicus GN=Ywhab PE=1 SV=3	6	2	0.94202	1.04619	0.954487	1.06004	1.00068	0.982826
Q5FVJ5	Uncharacterized protein C16orf45 homolog OS=Rattus norvegicus PE=2 SV=1	2	2	0.84278	0.892908	0.853968	0.904762	0.873604	0.000149099
Q6AY96	General transcription factor IIF subunit 1 OS=Rattus norvegicus GN=Gtf2f1 PE=1 SV=1	4	4	0.946645	1.00543	0.972432	1.03282	0.989332	0.591706
A0A0G2JVE6	Aminopeptidase OS=Rattus norvegicus GN=Anpep PE=1 SV=1	6	6	1.06494	1.03875	1.08638	1.05966	1.06244	0.000695909
B2GV14	Taxilin alpha OS=Rattus norvegicus GN=Txlna PE=1 SV=1	2	2	1.04613	1.15352	0.978913	1.07941	1.06449	0.125937
A0A0G2K464	Secretory carrier-associated membrane protein OS=Rattus norvegicus GN=Scamp5 PE=1 SV=1	1	1	0.999664	0.968708	0.932517	0.903641	0.951132	0.0584216
B5DF65	Biliverdin reductase B OS=Rattus norvegicus GN=Blvrb PE=1 SV=1	5	5	0.884524	0.994345	0.950432	1.06844	0.974434	0.532511
Q5PQL2	CCR4-NOT transcription complex subunit 9 OS=Rattus norvegicus GN=Cnot9 PE=1 SV=1	4	4	0.95634	1.01284	0.96252	1.01939	0.987772	0.485753
Q4QQS7	Uridine monophosphate synthetase OS=Rattus norvegicus GN=Umps PE=1 SV=1	6	6	1.00778	0.945891	1.0681	1.00251	1.00607	0.816077
P97685	Neurofascin OS=Rattus norvegicus GN=Nfasc PE=1 SV=2	5	5	0.953905	0.995519	1.00034	1.04397	0.998433	0.934972
G3V8H7	Olfactomedin-like 3 (Predicted) OS=Rattus norvegicus GN=Olfml3 PE=4 SV=1	4	4	1.04893	1.12531	0.93947	1.00788	1.0304	0.463891
Q6V9V9	Serine/threonine kinase 25 OS=Rattus norvegicus GN=Stk25 PE=1 SV=1	5	3	1.01567	0.984327	1.02935	0.997583	1.00673	0.521968
A0A0G2JZY0	LSM family member 14B OS=Rattus norvegicus GN=Lsm14b PE=1 SV=1	5	5	0.9826	0.970453	0.845719	0.835264	0.908509	0.0593064
F1LT58	Importin subunit alpha OS=Rattus norvegicus GN=Kpna6 PE=1 SV=3	4	4	0.946953	1.00032	0.952366	1.00603	0.976417	0.179725
Q920A6	Retinoid-inducible serine carboxypeptidase OS=Rattus norvegicus GN=Scpep1 PE=2 SV=1	3	3	0.751691	0.726134	1.08382	1.04697	0.902151	0.341276
B2RZD5	RCG41580, isoform CRA_a OS=Rattus norvegicus GN=Rpl22l1 PE=2 SV=1	1	1	0.971197	1.08706	0.969942	1.08565	1.02846	0.42718
Q0ZFS5	Zinc finger CCCH-type-containing 11A OS=Rattus norvegicus GN=Zc3h11a PE=1 SV=1	4	4	1.05963	0.989414	1.05554	0.985589	1.02254	0.308503
D3ZT71	BCL2-like 13 OS=Rattus norvegicus GN=Bcl2l13 PE=1 SV=3	3	3	0.97	0.895484	0.998009	0.921341	0.946208	0.0592961
Q9QZA6	CD151 antigen OS=Rattus norvegicus GN=Cd151 PE=1 SV=2	2	2	1.09527	1.04073	1.08815	1.03396	1.06453	0.00651492
Q9JIH7-2	Isoform 3 of Serine/threonine-protein kinase WNK1 OS=Rattus norvegicus GN=Wnk1	4	4	1.0861	1.14157	0.945141	0.993417	1.04156	0.384894
D3ZPE5	VPS53 GARP complex subunit OS=Rattus norvegicus GN=Vps53 PE=1 SV=1	2	2	1.03928	0.984149	1.01617	0.962264	1.00047	0.979
A0A0G2K0V4	Rho guanine nucleotide exchange factor 2 OS=Rattus norvegicus GN=Arhgef2 PE=1 SV=1	7	7	0.920354	1.07232	0.926859	1.0799	0.999859	0.997556
D3ZDK7	Glycerol-3-phosphate phosphatase OS=Rattus norvegicus GN=Pgp PE=1 SV=1	3	3	0.981812	1.01559	1.008	1.04268	1.01202	0.374104
Q3B7D0	Oxygen-dependent coproporphyrinogen-III oxidase, mitochondrial OS=Rattus norvegicus GN=Cpox PE=1 SV=1	3	3	0.931119	1.01661	0.969581	1.0586	0.993976	0.835271
D3ZSP1	Small nuclear ribonucleoprotein polypeptide E OS=Rattus norvegicus GN=LOC100361838 PE=4 SV=1	2	2	0.982798	1.01396	0.96127	0.991746	0.987443	0.293488
O08779	CD44 protein OS=Rattus norvegicus GN=Cd44 PE=2 SV=1	1	1	1	1.03463	1.04228	1.07838	1.03882	0.0522231
Q5RJN2	Pcolce protein OS=Rattus norvegicus GN=Pcolce PE=1 SV=1	4	4	0.889247	0.890419	1.02292	1.02427	0.956713	0.305142
Q5XIG4	OCIA domain-containing protein 1 OS=Rattus norvegicus GN=Ociad1 PE=1 SV=1	3	3	1.03866	1.00855	0.968421	0.940351	0.988996	0.629818
A0A0G2K8E7	Lysophospholipase D GDPD1 OS=Rattus norvegicus GN=Gdpd1 PE=1 SV=1	3	3	0.932048	0.928987	0.926377	0.923334	0.927686	1.91401e-08
Q3KR55	RCG60540, isoform CRA_a OS=Rattus norvegicus GN=U2af1 PE=1 SV=1	2	2	1.02384	1.00873	1.01329	0.998338	1.01105	0.0816414
A0A096P6M7	Anionic trypsin-2-like OS=Rattus norvegicus GN=LOC102554637 PE=3 SV=1	1	1	1.01092	0.998346	0.973558	0.961453	0.986068	0.263492
Q5FVQ8	NLR family member X1 OS=Rattus norvegicus GN=Nlrx1 PE=2 SV=1	6	6	1.08748	1.00996	0.952055	0.884184	0.98342	0.714174
P38718	Mitochondrial pyruvate carrier 2 OS=Rattus norvegicus GN=Mpc2 PE=2 SV=1	2	2	0.952174	0.973292	0.988076	1.00999	0.980883	0.167634
B2RYN1	Fructosamine-3-kinase-related protein OS=Rattus norvegicus GN=Fn3krp PE=1 SV=1	5	5	0.866912	0.938683	0.947206	1.02563	0.944606	0.138767
P70500	CDP-diacylglycerol--inositol 3-phosphatidyltransferase OS=Rattus norvegicus GN=Cdipt PE=1 SV=1	2	2	0.992241	1.00226	1.02028	1.03059	1.01134	0.237633
Q68G30	Kinesin light chain 3 OS=Rattus norvegicus GN=Klc3 PE=1 SV=1	4	4	0.907747	0.977528	0.948116	1.021	0.963598	0.178392
Q63450	Calcium/calmodulin-dependent protein kinase type 1 OS=Rattus norvegicus GN=Camk1 PE=1 SV=2	4	4	0.907506	0.938534	0.95521	0.987869	0.94728	0.0199032
D3ZBL6	Nucleoporin 160 OS=Rattus norvegicus GN=Nup160 PE=1 SV=3	5	5	0.976789	1.09062	0.976789	1.09062	1.0337	0.344602
Q4V7E8	Leucine-rich repeat flightless-interacting protein 2 OS=Rattus norvegicus GN=Lrrfip2 PE=1 SV=1	3	3	1.05362	1.0929	1.0085	1.04609	1.05028	0.0270992
D3ZXJ5	Elongation factor-like GTPase 1 OS=Rattus norvegicus GN=Efl1 PE=1 SV=2	7	7	0.873586	0.856618	1.02693	1.00698	0.941028	0.230178
A2RUV9	Adipocyte enhancer-binding protein 1 OS=Rattus norvegicus GN=Aebp1 PE=2 SV=1	1	1	1.04665	0.965517	0.99871	0.92129	0.983043	0.545538
B5DEK0	Regulation of nuclear pre-mRNA domain-containing 1B OS=Rattus norvegicus GN=Rprd1b PE=1 SV=1	5	5	0.871622	0.988176	0.945632	1.07208	0.969378	0.491974
M0R3V4	Myeloid-derived growth factor OS=Rattus norvegicus GN=Mydgf PE=1 SV=2	1	1	1.0361	0.966912	1.2224	1.14077	1.09154	0.155607
O54715	V-type proton ATPase subunit S1 OS=Rattus norvegicus GN=Atp6ap1 PE=2 SV=1	2	2	0.942857	0.946201	0.987269	0.99077	0.966774	0.0418053
B5DFD1	NudC domain containing 1 OS=Rattus norvegicus GN=Nudcd1 PE=2 SV=1	5	5	1.00911	1.11093	0.986641	1.0862	1.04822	0.157424
Q62896	BET1 homolog OS=Rattus norvegicus GN=Bet1 PE=1 SV=1	2	2	1.07074	1.02381	1.04937	1.00338	1.03683	0.0462756
D3ZWC6	Syntrophin, basic 1 (Predicted) OS=Rattus norvegicus GN=Sntb1 PE=1 SV=1	3	3	1.07165	1.01275	1.03424	0.977394	1.02401	0.269499
F1LR02	Collagen type XVIII alpha 1 chain OS=Rattus norvegicus GN=Col18a1 PE=1 SV=2	4	4	1.11621	1.07389	1.10511	1.06321	1.08961	0.000381464
A0A0G2K6S9	Myosin-11 OS=Rattus norvegicus GN=Myh11 PE=1 SV=1	16	6	0.858639	0.98016	0.801853	0.915337	0.888997	0.0271546
A0A0G2JUF2	Sorting nexin family member 30 OS=Rattus norvegicus GN=Snx30 PE=1 SV=1	2	2	1.08362	1.0517	0.982384	0.953444	1.01779	0.576212
B0BN30	Mitochondrial carrier 1 OS=Rattus norvegicus GN=Mtch1 PE=1 SV=1	3	3	1.08504	1.21416	1.01692	1.13793	1.11351	0.0345499
B3Y9H3	S100 calcium binding protein A10 OS=Rattus norvegicus GN=S100a10 PE=2 SV=1	3	3	1.2394	1.06302	0.964528	0.827267	1.02355	0.794938
M0RBQ5	Histone H2B OS=Rattus norvegicus GN=Hist3h2bb PE=3 SV=1	7	2	0.973545	1.03143	0.884866	0.937482	0.956832	0.210856
A0A0G2JSZ9	Copper chaperone for superoxide dismutase OS=Rattus norvegicus GN=Ccs PE=1 SV=1	3	3	0.880979	0.990433	0.988321	1.11111	0.992711	0.881883
D4A994	ER membrane protein complex subunit 1 OS=Rattus norvegicus GN=Emc1 PE=1 SV=1	5	5	1.01524	1.05901	0.983046	1.02543	1.02068	0.234388
A0A0G2K4T7	General transcription factor II-I OS=Rattus norvegicus GN=Gtf2i PE=1 SV=1	6	6	0.955488	1.0561	0.938604	1.03744	0.996907	0.919197
Q5FVG5	Similar to tropomyosin 1, embryonic fibroblast-rat, isoform CRA_c OS=Rattus norvegicus GN=Tpm2 PE=2 SV=1	7	2	1.00319	1.06194	0.893121	0.945424	0.97592	0.533197
A0A0G2K7M2	RAD23 homolog A, nucleotide excision repair protein OS=Rattus norvegicus GN=Rad23a PE=1 SV=1	6	4	1.03185	1.04728	1.02311	1.03841	1.03516	0.000465359
Q99MI5	Spermidine synthase OS=Rattus norvegicus GN=LOC100912604 PE=1 SV=1	3	3	0.858352	0.807041	0.969482	0.911529	0.886601	0.0174883
D4AAM0	Transportin 3 OS=Rattus norvegicus GN=Tnpo3 PE=1 SV=2	4	4	0.985276	1.0448	0.937407	0.994039	0.99038	0.677196
D3ZWW5	RCG64242 OS=Rattus norvegicus GN=Slc30a9 PE=1 SV=1	4	4	1.05738	2.11913	0.93446	1.87278	1.49594	0.142719
F1LPH1	Calpastatin OS=Rattus norvegicus GN=Cast PE=1 SV=1	3	3	1.02905	1.02383	1.03445	1.0292	1.02913	1.05498e-05
Q5RKH6	Protein OS-9 OS=Rattus norvegicus GN=Os9 PE=1 SV=1	5	5	1.03375	1.10583	0.98256	1.05107	1.0433	0.139299
F1M7S2	Proteasome inhibitor PI31 subunit OS=Rattus norvegicus GN=Psmf1 PE=1 SV=2	4	4	0.991839	0.946642	1.01217	0.966047	0.979175	0.19761
Q5U2Q3	Ester hydrolase C11orf54 homolog OS=Rattus norvegicus PE=1 SV=1	3	3	0.992781	0.914626	0.96169	0.885984	0.93877	0.0423394
M0RDD7	Chromatin target of PRMT1-like 1 OS=Rattus norvegicus GN=Chtopl1 PE=4 SV=1	2	2	1.03162	1.01141	1.03805	1.01771	1.0247	0.00691022
Q6AYK6	Calcyclin-binding protein OS=Rattus norvegicus GN=Cacybp PE=1 SV=1	1	1	0.958912	0.912085	1.01861	0.96887	0.96462	0.156433
P31044	Phosphatidylethanolamine-binding protein 1 OS=Rattus norvegicus GN=Pebp1 PE=1 SV=3	2	2	0.960992	0.906562	1.04094	0.981985	0.97262	0.362252
P56603	Secretory carrier-associated membrane protein 1 OS=Rattus norvegicus GN=Scamp1 PE=1 SV=1	4	4	0.978756	0.990148	0.864564	0.874626	0.927023	0.0709371
B5DEH4	UDP-N-acetylglucosamine pyrophosphorylase 1-like 1 OS=Rattus norvegicus GN=Uap1l1 PE=1 SV=1	5	5	1.02446	0.962021	1.06848	1.00336	1.01458	0.534945
B2GUY0	Endoplasmic reticulum mannosyl-oligosaccharide 1,2-alpha-mannosidase OS=Rattus norvegicus GN=Man1b1 PE=2 SV=2	4	4	1.0111	0.879518	1.19393	1.03856	1.03078	0.650198
B1WBY5	DnaJ (Hsp40) homolog, subfamily C, member 11 OS=Rattus norvegicus GN=Dnajc11 PE=1 SV=1	4	4	0.991913	1.08336	0.940153	1.02683	1.01056	0.737593
B1WC73	ADP-ribosylation factor-like 6 (Predicted), isoform CRA_a OS=Rattus norvegicus GN=Arl6 PE=1 SV=1	5	5	0.838676	0.903048	0.89487	0.963555	0.900037	0.00787437
Q5XIC0	Enoyl-CoA delta isomerase 2, mitochondrial OS=Rattus norvegicus GN=Eci2 PE=1 SV=1	5	5	0.97354	1.00852	0.957523	0.991923	0.982876	0.172677
P04166	Cytochrome b5 type B OS=Rattus norvegicus GN=Cyb5b PE=1 SV=2	2	2	1.043	1.30521	0.960984	1.20258	1.12794	0.14988
A0A0G2K459	Mitochondrial carrier 2 OS=Rattus norvegicus GN=Mtch2 PE=1 SV=1	3	3	0.961285	1.08463	0.997819	1.12586	1.0424	0.307056
Q4QQW4	Histone deacetylase 1 OS=Rattus norvegicus GN=Hdac1 PE=1 SV=1	2	2	1.08544	1.04492	1.07384	1.03375	1.05949	0.0026584
P07936	Neuromodulin OS=Rattus norvegicus GN=Gap43 PE=1 SV=1	3	3	0.982306	1.03569	1.01834	1.07369	1.02751	0.197608
D4A7S6	LOC363020 (Predicted) OS=Rattus norvegicus GN=Smco4 PE=4 SV=1	1	1	1.27802	1.13505	1.10514	0.981507	1.12493	0.0860655
A0A0G2K9I8	Protein arginine methyltransferase 1-like OS=Rattus norvegicus GN=LOC100361025 PE=3 SV=1	7	7	0.955083	0.924941	1.09005	1.05565	1.00643	0.875914
A0A0G2JU66	Nuclear protein localization protein 4 homolog OS=Rattus norvegicus GN=Nploc4 PE=1 SV=1	7	7	1.03557	1.09292	0.998764	1.05408	1.04533	0.0599324
S4VP54	MAP2K4delta OS=Rattus norvegicus GN=Map2k4 PE=2 SV=1	3	3	0.980909	0.93	1.02893	0.975524	0.97884	0.335783
Q6AZ25	Tropomyosin 1, alpha OS=Rattus norvegicus GN=Tpm1 PE=2 SV=1	12	2	0.893705	0.990889	0.894446	0.99171	0.942688	0.0872054
Q5QJC9	BAG family molecular chaperone regulator 5 OS=Rattus norvegicus GN=Bag5 PE=1 SV=1	7	7	0.947661	0.945906	0.947384	0.94563	0.946645	5.30268e-11
F1LQZ3	Kinesin-like protein OS=Rattus norvegicus GN=Kif3a PE=1 SV=2	5	5	0.94519	0.998251	0.974159	1.02885	0.986611	0.479738
F1LR36	Transcription elongation factor spt6 OS=Rattus norvegicus GN=Supt6h PE=1 SV=2	6	6	1.00216	1.01111	0.96237	0.970963	0.98665	0.301547
P04631	Protein S100-B OS=Rattus norvegicus GN=S100b PE=1 SV=2	2	2	0.860662	0.934305	0.798869	0.867224	0.865265	0.00280551
O08984	Lamin-B receptor OS=Rattus norvegicus GN=Lbr PE=1 SV=1	1	1	0.994188	1.00153	0.990552	0.997867	0.996034	0.144316
D4AD31	PHD finger protein 8 OS=Rattus norvegicus GN=Phf8 PE=1 SV=2	1	1	1.80934	1.12785	1.71136	1.06677	1.42883	0.0678549
Q6IRS6	Fetub protein OS=Rattus norvegicus GN=Fetub PE=1 SV=1	3	3	1.04621	0.794608	0.931429	0.707429	0.86992	0.132204
E9PU34	RCG41110 OS=Rattus norvegicus GN=Rmnd1 PE=1 SV=2	1	1	0.950714	0.957422	0.915216	0.921673	0.936256	0.000887827
Q5PQQ2	WW domain-binding protein 11 OS=Rattus norvegicus GN=Wbp11 PE=1 SV=1	3	3	0.990898	0.972391	0.962286	0.944313	0.967472	0.0155559
Q4KLI4	Peptidyl-prolyl cis-trans isomerase OS=Rattus norvegicus GN=Ppil1 PE=1 SV=1	3	3	0.942602	0.964234	0.931585	0.952965	0.947846	0.000299493
A0A0G2K761	Cullin 2 OS=Rattus norvegicus GN=Cul2 PE=1 SV=1	3	3	0.937751	0.980207	0.998778	1.044	0.990183	0.671356
Q9R0I8	Phosphatidylinositol 5-phosphate 4-kinase type-2 alpha OS=Rattus norvegicus GN=Pip4k2a PE=1 SV=1	3	2	1.00926	1.01759	1.00461	1.0129	1.01109	0.00688873
P40112	Proteasome subunit beta type-3 OS=Rattus norvegicus GN=Psmb3 PE=1 SV=1	3	3	1.11066	1.02172	1.01019	0.929299	1.01797	0.645454
Q6AY23	Pyrroline-5-carboxylate reductase 2 OS=Rattus norvegicus GN=Pycr2 PE=2 SV=1	4	2	0.975566	1.0885	0.948711	1.05853	1.01783	0.610448
G3V8V1	Granulin, isoform CRA_c OS=Rattus norvegicus GN=Grn PE=4 SV=1	4	4	1.09672	1.01606	1.08907	1.00897	1.05271	0.0643632
F1M4I4	VPS51 GARP complex subunit OS=Rattus norvegicus GN=Vps51 PE=1 SV=2	7	7	0.982031	1.04792	0.954307	1.01834	1.00065	0.975808
D4AC36	Eukaryotic translation initiation factor 3 subunit F OS=Rattus norvegicus GN=Eif3f PE=1 SV=3	5	5	1.05875	1.01356	1.00613	0.96319	1.01041	0.613912
A0A0G2K4G3	NEDD8 OS=Rattus norvegicus GN=Nedd8 PE=1 SV=1	2	2	0.919821	0.88702	1.00459	0.968769	0.945051	0.0789958
A0A0H2UHK0	Swi5-dependent recombination DNA repair protein 1 homolog OS=Rattus norvegicus GN=Sfr1 PE=1 SV=1	4	4	0.925092	0.880315	0.958844	0.912434	0.919171	0.00250752
P20069	Mitochondrial-processing peptidase subunit alpha OS=Rattus norvegicus GN=Pmpca PE=1 SV=1	4	4	0.958613	1.00408	0.939178	0.983724	0.971399	0.0907321
D3ZFH5	Inter-alpha-trypsin inhibitor heavy chain 2 OS=Rattus norvegicus GN=Itih2 PE=1 SV=3	3	3	1.21215	1.2232	0.959196	0.967939	1.09062	0.263187
Q5PPJ9	Endophilin-B2 OS=Rattus norvegicus GN=Sh3glb2 PE=1 SV=2	5	4	1.02523	1.0109	1.03424	1.01979	1.02254	0.00366437
D4A0A1	SOGA family member 3 OS=Rattus norvegicus GN=Soga3 PE=1 SV=1	4	3	0.956989	0.982854	0.883552	0.907432	0.932707	0.0249491
Q5I034	Uncharacterized protein C12orf43 homolog OS=Rattus norvegicus PE=1 SV=1	4	4	0.991278	0.966617	1.04403	1.01806	1.00499	0.775242
D4ADF5	Programmed cell death 5 OS=Rattus norvegicus GN=Pdcd5 PE=1 SV=1	3	3	1.02711	0.961359	1.03746	0.971042	0.999242	0.969943
Q5EGY4	Synaptobrevin homolog YKT6 OS=Rattus norvegicus GN=Ykt6 PE=1 SV=1	4	4	1.02103	1.00773	0.98744	0.974581	0.997695	0.831061
Q6DGG1	Protein ABHD14B OS=Rattus norvegicus GN=Abhd14b PE=2 SV=1	3	3	1.02068	1.0179	0.97179	0.969145	0.994879	0.729184
Q3MID3	ADP-ribosylation factor GTPase-activating protein 2 OS=Rattus norvegicus GN=Arfgap2 PE=1 SV=1	5	5	1.00639	1.09674	1.04916	1.14336	1.07391	0.0467296
D4AAH9	TBC1 domain family, member 23 OS=Rattus norvegicus GN=Tbc1d23 PE=1 SV=2	5	5	0.932227	1.01856	0.955331	1.0438	0.987481	0.649434
Q6MG49	Large proline-rich protein BAG6 OS=Rattus norvegicus GN=Bag6 PE=1 SV=2	7	7	0.982524	1.05065	1.10493	1.18155	1.07991	0.106618
Q5U1W6	MICOS complex subunit OS=Rattus norvegicus GN=Apool PE=1 SV=1	2	2	0.997895	0.958496	1.01561	0.975513	0.986879	0.335066
A0A140TAH3	Glutamate-rich WD repeat-containing protein 1 OS=Rattus norvegicus GN=Grwd1 PE=1 SV=1	3	3	1.00515	1.01453	0.944792	0.953614	0.979521	0.29127
Q5PQW8	Guanylate binding protein 2 OS=Rattus norvegicus GN=Gbp2 PE=1 SV=1	4	4	1.07263	1.16075	1.05358	1.14014	1.10677	0.00614884
F1MA97	Thrombospondin type 1 domain-containing 7A OS=Rattus norvegicus GN=Thsd7a PE=4 SV=3	4	4	0.887583	0.947397	0.927197	0.989679	0.937964	0.0266431
A0A0G2JT06	COP9 signalosome complex subunit 1 OS=Rattus norvegicus GN=Gps1 PE=1 SV=1	5	5	0.988704	0.935791	1.01186	0.957712	0.973518	0.165357
Q6P791	Ragulator complex protein LAMTOR1 OS=Rattus norvegicus GN=Lamtor1 PE=1 SV=1	2	2	0.989881	1.02917	0.991948	1.03132	1.01058	0.388069
B0BN74	Bag2 protein OS=Rattus norvegicus GN=Bag2 PE=2 SV=1	2	2	1.03671	1.02178	1.01896	1.00428	1.02043	0.0218054
Q3B8N9	Biphenyl hydrolase-like OS=Rattus norvegicus GN=Bphl PE=1 SV=1	3	3	0.825315	0.8453	0.860782	0.881626	0.853256	1.75262e-05
A1L122	NEDD8-activating enzyme E1 regulatory subunit OS=Rattus norvegicus GN=Nae1 PE=2 SV=1	4	4	1.02731	1.0629	1.02605	1.0616	1.04447	0.0049429
D3ZE72	Methionine aminopeptidase OS=Rattus norvegicus GN=Metap1 PE=1 SV=1	3	3	0.902209	1.08136	0.942584	1.12975	1.01398	0.805897
G3V6Z7	Golgi autoantigen, golgin subfamily a, 5, isoform CRA_a OS=Rattus norvegicus GN=Golga5 PE=1 SV=1	6	6	1.08662	1.17873	1.06629	1.15668	1.12208	0.00404333
P00388	NADPH--cytochrome P450 reductase OS=Rattus norvegicus GN=Por PE=1 SV=3	6	6	1.01143	0.925714	1.03509	0.947368	0.9799	0.466774
G3V7V5	Peptidylprolyl isomerase OS=Rattus norvegicus GN=Fkbp11 PE=1 SV=1	3	3	1.24353	1.13119	1.24537	1.13286	1.18824	0.00115207
Q4KLZ6	Triokinase/FMN cyclase OS=Rattus norvegicus GN=Tkfc PE=1 SV=1	6	6	0.900241	0.911741	0.972832	0.98526	0.942519	0.0360651
D4A4P3	NADH:ubiquinone oxidoreductase subunit B3 OS=Rattus norvegicus GN=Ndufb3 PE=1 SV=1	1	1	1.08191	1.12785	1.04272	1.087	1.08487	0.00277978
F1LSC3	Splicing factor 1 OS=Rattus norvegicus GN=Sf1 PE=1 SV=2	4	4	1.08433	0.992276	1.08642	0.994195	1.03931	0.190044
Q63965	Sideroflexin-1 OS=Rattus norvegicus GN=Sfxn1 PE=2 SV=4	8	1	0.974566	0.903179	0.99089	0.918307	0.946736	0.0462735
Q5XI29	Cleavage and polyadenylation specificity factor subunit 7 OS=Rattus norvegicus GN=Cpsf7 PE=1 SV=1	4	4	0.874417	0.991196	0.925459	1.04905	0.960032	0.334595
D4AD70	Similar to 60S ribosomal protein L38 OS=Rattus norvegicus GN=RGD1561636 PE=3 SV=1	3	3	0.854109	0.855879	1.08165	1.08389	0.968883	0.652789
D3ZV63	Similar to cDNA sequence BC003331 OS=Rattus norvegicus GN=RGD1307830 PE=1 SV=1	2	2	1.02053	1.04891	1.04936	1.07855	1.04934	0.00590506
Q3B8R7	Mitochondrial ribosomal protein L47 OS=Rattus norvegicus GN=Mrpl47 PE=1 SV=1	3	3	0.919293	0.957065	0.895922	0.932733	0.926253	0.0011822
A0A0G2QC22	Putative uncharacterized protein RGD1306215_predicted OS=Rattus norvegicus GN=Paxx PE=1 SV=1	3	3	1.02081	1.08959	1.02888	1.09821	1.05937	0.025376
D4A9W3	Similar to hypothetical protein FLJ20950 OS=Rattus norvegicus GN=Dglucy PE=1 SV=1	6	6	0.975547	0.966341	1.01954	1.00992	0.992838	0.599654
A0A0G2KAI8	Developmentally-regulated GTP-binding protein 2 OS=Rattus norvegicus GN=Drg2 PE=1 SV=1	6	6	1.0475	1.07927	1.0527	1.08462	1.06602	0.000396729
Q4G017	Nischarin OS=Rattus norvegicus GN=Nisch PE=2 SV=2	6	6	0.977266	0.964317	1.01585	1.00239	0.989957	0.423813
A0A0G2JYA2	ADP-ribosylation factor interacting protein 1, isoform CRA_b OS=Rattus norvegicus GN=Arfip1 PE=1 SV=1	6	6	0.95851	0.971493	0.976423	0.989649	0.974019	0.00682503
P49793	Nuclear pore complex protein Nup98-Nup96 OS=Rattus norvegicus GN=Nup98 PE=1 SV=2	4	4	0.982948	0.99104	1.0119	1.02023	1.00153	0.866467
D3Z8B2	Nucleoporin 133 OS=Rattus norvegicus GN=Nup133 PE=1 SV=3	8	8	0.976457	1.10479	0.945773	1.07008	1.02428	0.543156
A0A0G2K8P3	E3 ubiquitin-protein ligase OS=Rattus norvegicus GN=Nedd4 PE=1 SV=1	9	8	0.992126	1.03879	0.977025	1.02298	1.00773	0.603218
Q5XI97	Alanyl-tRNA editing protein Aarsd1 OS=Rattus norvegicus GN=Aarsd1 PE=1 SV=1	5	5	0.876931	1.04325	0.766944	0.912407	0.899884	0.129228
B2GV74	Kinesin light chain 2 OS=Rattus norvegicus GN=Klc2 PE=1 SV=1	7	6	0.945751	0.980072	0.986147	1.02193	0.983476	0.330304
A0A0G2JXJ9	Keratin, type I cytoskeletal 14 OS=Rattus norvegicus GN=Krt14 PE=1 SV=1	4	1	1.12975	0.910532	1.26366	1.01846	1.0806	0.327777
D4A6X7	Phosphopantothenoylcysteine synthetase OS=Rattus norvegicus GN=Ppcs PE=1 SV=1	4	4	0.949806	0.990571	0.972735	1.01448	0.981899	0.234453
M0R5V1	Protein phosphatase, Mg2+/Mn2+-dependent, 1L OS=Rattus norvegicus GN=Ppm1l PE=1 SV=1	4	4	0.925966	0.897055	0.964809	0.934685	0.930629	0.00251541
D3ZB48	Hook homolog 1 (Drosophila) (Predicted) OS=Rattus norvegicus GN=Hook1 PE=1 SV=1	4	4	0.984496	1.02268	0.947238	0.983978	0.984598	0.355918
B2GV58	LSM14A mRNA-processing body assembly factor OS=Rattus norvegicus GN=Lsm14a PE=1 SV=1	1	1	0.994783	0.993043	1.02939	1.02759	1.0112	0.305204
A0A0G2JY03	Uncharacterized protein OS=Rattus norvegicus PE=1 SV=1	8	5	0.954141	0.962757	0.980297	0.989149	0.971586	0.0120001
Q6AY86	Vacuolar protein sorting-associated protein 26A OS=Rattus norvegicus GN=Vps26a PE=1 SV=1	3	3	1.10871	1.09	1.02049	1.00327	1.05562	0.074358
Q9WVA1	Mitochondrial import inner membrane translocase subunit Tim8 A OS=Rattus norvegicus GN=Timm8a PE=1 SV=1	2	2	1.01742	0.960721	1.02044	0.963566	0.990538	0.585271
D4AAZ8	Interferon regulatory factor 2 binding protein 1 (Predicted) OS=Rattus norvegicus GN=Irf2bp1 PE=1 SV=1	3	3	0.967163	0.988212	0.970978	0.99211	0.979616	0.0165439
D3ZYK9	Nucleophosmin/nucleoplasmin, 3 OS=Rattus norvegicus GN=Npm3 PE=1 SV=1	3	3	1.08907	1.03222	0.970994	0.920304	1.00315	0.934385
B3VPA7	Cysteine-sulfinate decarboxylase OS=Rattus norvegicus GN=Csad PE=2 SV=1	6	6	0.898645	1.04794	0.931156	1.08585	0.990899	0.846562
P17220	Proteasome subunit alpha type-2 OS=Rattus norvegicus GN=Psma2 PE=1 SV=3	1	1	0.982916	0.927392	1.02433	0.966469	0.975277	0.264171
Q6AYS6	Sorting nexin-17 OS=Rattus norvegicus GN=Snx17 PE=1 SV=1	3	3	0.953207	0.929535	0.971661	0.947531	0.950483	0.00125257
D3ZQ32	Pappalysin 2 OS=Rattus norvegicus GN=Pappa2 PE=4 SV=2	4	4	0.864022	0.904441	0.765473	0.801282	0.833805	0.00176361
Q66HG4	Aldose 1-epimerase OS=Rattus norvegicus GN=Galm PE=1 SV=1	2	2	1.07	0.911193	1.16054	0.988294	1.0325	0.566409
Q5BJS0	Putative ATP-dependent RNA helicase DHX30 OS=Rattus norvegicus GN=Dhx30 PE=1 SV=1	5	5	0.940889	0.962039	0.965229	0.986926	0.963771	0.00850025
Q3S4A4	ADP-ribosylation factor GTPase activating protein 1 heart isoform OS=Rattus norvegicus GN=Arfgap1 PE=1 SV=1	6	6	0.75648	0.687868	0.960985	0.873824	0.819789	0.025052
D3ZX38	Prefoldin 1 (Predicted) OS=Rattus norvegicus GN=Pfdn1 PE=1 SV=1	3	2	0.921755	0.828972	1.08629	0.976947	0.953492	0.420325
A0A0G2K5L2	Mitochondrial glutamate carrier 1-like OS=Rattus norvegicus GN=LOC100911440 PE=1 SV=1	4	4	0.99431	0.973257	1.01363	0.992169	0.993342	0.450605
A0A0G2JSS9	Atlastin-3 OS=Rattus norvegicus GN=Atl3 PE=1 SV=1	6	6	0.980162	1.0869	0.961623	1.06634	1.02375	0.473099
A6Y7S3	Potassium channel tetramerisation domain containing 8 (Predicted) OS=Rattus norvegicus GN=Kctd8 PE=2 SV=1	1	1	0.983198	0.969476	0.962709	0.949273	0.966164	0.00302644
D3ZRN5	TROVE domain family, member 2 OS=Rattus norvegicus GN=Trove2 PE=1 SV=1	6	6	0.950041	0.917904	0.981585	0.948382	0.949478	0.0081225
B3SVE6	Neuroprotective protein 9 (Fragment) OS=Rattus norvegicus PE=2 SV=1	3	3	1.03318	1.05931	1.07123	1.09833	1.06551	0.00286501
G3V834	Protein PRRC1 OS=Rattus norvegicus GN=Prrc1 PE=1 SV=1	6	6	1.11129	0.964691	1.11869	0.97112	1.04145	0.367176
P63025	Vesicle-associated membrane protein 3 OS=Rattus norvegicus GN=Vamp3 PE=1 SV=1	3	1	0.979983	1.02697	0.953734	0.999459	0.990036	0.543313
A0A0G2K2L8	Peripheral plasma membrane protein CASK OS=Rattus norvegicus GN=LOC100910506 PE=1 SV=1	8	8	0.983561	0.950125	0.949691	0.917407	0.950196	0.0102351
Q8CHN7	Calmodulin regulator protein PCP4 OS=Rattus norvegicus GN=Pcp4 PE=2 SV=1	2	2	0.940581	1.09912	0.933122	1.0904	1.01581	0.740937
Q8K453	BRAK OS=Rattus norvegicus GN=Cxcl14 PE=2 SV=1	1	1	1.08613	1.19779	1.08413	1.19558	1.1409	0.00469505
D3ZUC2	Mov10 RISC complex RNA helicase OS=Rattus norvegicus GN=Mov10 PE=1 SV=1	7	7	1.00684	1.04904	1.01349	1.05597	1.03134	0.0445875
Q5U355	Itfg1 protein OS=Rattus norvegicus GN=Itfg1 PE=1 SV=1	3	3	1.00369	1.10199	0.986596	1.08322	1.04387	0.176008
G3V9T7	ATPase Asna1 OS=Rattus norvegicus GN=Asna1 PE=1 SV=1	5	5	0.929769	0.92348	1.00396	0.99717	0.963595	0.140254
Q5M7W6	Protein FAM234A OS=Rattus norvegicus GN=Fam234a PE=1 SV=1	4	4	1.04967	1.07008	0.946919	0.965324	1.008	0.80172
A0A0G2K5Q8	Secretory carrier-associated membrane protein OS=Rattus norvegicus GN=Clk2 PE=1 SV=1	3	3	1.05858	1.08118	1.00508	1.02654	1.04284	0.0439618
P00173	Cytochrome b5 OS=Rattus norvegicus GN=Cyb5a PE=1 SV=2	3	3	1.00423	1.03465	1.00084	1.03116	1.01772	0.0913759
A0A1B0GWS0	PTPRF-interacting protein alpha 1 OS=Rattus norvegicus GN=Ppfia1 PE=1 SV=1	5	5	0.932323	0.955317	0.969302	0.993208	0.962538	0.0260268
Q68FX1	Mannose-6-phosphate isomerase OS=Rattus norvegicus GN=Mpi PE=2 SV=1	3	3	1.04571	0.971286	1.05373	0.978742	1.01237	0.589098
G3V7T3	Pantothenate kinase 4 OS=Rattus norvegicus GN=Pank4 PE=1 SV=1	5	5	0.96748	1.01138	0.967742	1.01166	0.989565	0.441855
G3V712	Keratin complex 2, basic, gene 7, isoform CRA_a OS=Rattus norvegicus GN=Krt7 PE=1 SV=1	11	7	0.894091	1.00025	0.948725	1.06137	0.976109	0.528718
E9PT85	X-ray repair cross-complementing 6 OS=Rattus norvegicus GN=Xrcc6 PE=1 SV=1	5	5	0.947983	0.956741	1.01276	1.02212	0.984899	0.456277
D4AE03	Endo-beta-N-acetylglucosaminidase OS=Rattus norvegicus GN=Engase PE=1 SV=1	2	2	1.06619	1.03846	1.02405	0.997423	1.03153	0.0702471
Q99PV2	Syntaxin binding protein 3, isoform CRA_a OS=Rattus norvegicus GN=Stxbp3 PE=1 SV=1	10	10	0.900552	1.05123	0.878706	1.02573	0.964055	0.440357
Q6DGF2	Clathrin interactor 1 OS=Rattus norvegicus GN=Clint1 PE=1 SV=1	4	4	0.973956	0.911015	0.966353	0.903903	0.938806	0.0152662
B5DF55	RCG55706 OS=Rattus norvegicus GN=Stam PE=1 SV=1	6	6	1.04539	0.983125	1.03366	0.972094	1.00857	0.654004
Q68FP9	Conserved oligomeric Golgi complex subunit 6 OS=Rattus norvegicus GN=Cog6 PE=2 SV=1	6	6	1.05986	1.09289	0.98358	1.01423	1.03764	0.17057
D4A7Z5	Diablo-like OS=Rattus norvegicus GN=LOC100360940 PE=4 SV=2	4	4	1.00897	1.05945	0.986564	1.03592	1.02273	0.201914
D4AAU4	Regulation of nuclear pre-mRNA domain-containing 1A OS=Rattus norvegicus GN=Rprd1a PE=1 SV=1	6	6	1.05725	1.00088	1.0557	0.999414	1.02831	0.132422
B3STT9	Neuroprotective protein 3 OS=Rattus norvegicus GN=Kdm1a PE=2 SV=1	4	4	1.01982	0.996602	0.955679	0.933917	0.976506	0.271959
A0A0G2K8R3	LIM domain 7 OS=Rattus norvegicus GN=Lmo7 PE=1 SV=1	3	3	0.864878	0.869669	0.810872	0.815364	0.840196	5.21791e-05
P13471	40S ribosomal protein S14 OS=Rattus norvegicus GN=Rps14 PE=2 SV=3	2	2	1.05121	0.972651	1.04664	0.968424	1.00973	0.682666
A0A0G2K350	NSF attachment protein gamma OS=Rattus norvegicus GN=Napg PE=1 SV=1	3	3	0.984745	0.92182	0.930742	0.871267	0.927143	0.0201984
A0A0H2UHF6	PRA1 family protein OS=Rattus norvegicus GN=Arl6ip5 PE=1 SV=1	3	3	1.04781	1.08085	0.964524	0.994932	1.02203	0.430779
P70582	Nuclear pore complex protein Nup54 OS=Rattus norvegicus GN=Nup54 PE=1 SV=1	3	3	0.892875	0.948157	0.930125	0.987714	0.939718	0.0222633
Q5U313	Ankyrin repeat domain 13a OS=Rattus norvegicus GN=Ankrd13a PE=1 SV=1	6	6	1.11023	1.16458	1.07925	1.13209	1.12154	0.000511773
Q62825	Exocyst complex component 3 OS=Rattus norvegicus GN=Exoc3 PE=1 SV=1	5	5	0.926444	0.936116	0.939355	0.949161	0.937769	1.12421e-05
O35889	Afadin OS=Rattus norvegicus GN=Afdn PE=1 SV=1	9	9	0.918347	1.06603	0.91997	1.06791	0.993064	0.876221
E9PU28	Inosine-5'-monophosphate dehydrogenase 2 OS=Rattus norvegicus GN=Impdh2 PE=1 SV=1	5	4	1.00055	0.954446	0.947505	0.903846	0.951586	0.0500648
B4F795	Choline transporter-like protein 2 OS=Rattus norvegicus GN=Slc44a2 PE=2 SV=1	3	3	1.02675	1.0397	1.00303	1.01568	1.02129	0.034537
D4AB33	Paternally-expressed 3 OS=Rattus norvegicus GN=Peg3 PE=1 SV=2	5	5	1.12716	1.1	1.07824	1.05226	1.08941	0.00136108
P70600	Protein-tyrosine kinase 2-beta OS=Rattus norvegicus GN=Ptk2b PE=1 SV=1	3	2	1.0895	1.00179	1.04732	0.963005	1.0254	0.390383
Q63151	Long-chain-fatty-acid--CoA ligase 3 OS=Rattus norvegicus GN=Acsl3 PE=1 SV=1	6	6	1.02235	0.957821	1.05384	0.987331	1.00534	0.806709
Q566C7	Diphosphoinositol polyphosphate phosphohydrolase 1 OS=Rattus norvegicus GN=Nudt3 PE=1 SV=1	5	4	0.92966	0.980955	1.02463	1.08116	1.0041	0.902775
B5DFB2	RB-binding protein 4, chromatin-remodeling factor OS=Rattus norvegicus GN=Rbbp4 PE=1 SV=1	5	2	1.05769	1.01875	1.0223	0.984667	1.02085	0.211851
B2RYS6	Hypoxanthine phosphoribosyltransferase OS=Rattus norvegicus GN=Prtfdc1 PE=1 SV=1	4	3	0.960293	0.9872	0.999456	1.02746	0.993602	0.66238
Q6IN37	GM2 ganglioside activator OS=Rattus norvegicus GN=Gm2a PE=1 SV=1	3	3	0.967895	0.951053	1.0163	0.998618	0.983467	0.304361
Q5RKH1	Serine/threonine-protein kinase PRP4 homolog OS=Rattus norvegicus GN=Prpf4b PE=1 SV=1	5	5	0.939734	0.998468	0.931881	0.990124	0.965052	0.0862051
F1M3F8	Calcium/calmodulin-dependent protein kinase type II subunit gamma OS=Rattus norvegicus GN=Camk2g PE=1 SV=3	4	2	1.01685	0.888152	1.10571	0.965766	0.994118	0.901667
B2RZD1	Protein transport protein Sec61 subunit beta OS=Rattus norvegicus GN=Sec61b PE=1 SV=1	1	1	1.12496	1.21082	1.06509	1.14637	1.13681	0.00389549
D4ADP1	Protein FAM162A OS=Rattus norvegicus GN=Fam162a PE=1 SV=1	3	3	0.829131	0.792886	1.04631	1.00057	0.917223	0.233368
Q562C9	1,2-dihydroxy-3-keto-5-methylthiopentene dioxygenase OS=Rattus norvegicus GN=Adi1 PE=2 SV=1	1	1	1.0948	0.984844	1.14374	1.02887	1.06307	0.122709
A0A0U1RRV5	Clustered mitochondria protein homolog OS=Rattus norvegicus GN=Cluh PE=1 SV=1	3	3	0.96671	0.998427	0.958669	0.990122	0.978482	0.0623959
P21575	Dynamin-1 OS=Rattus norvegicus GN=Dnm1 PE=1 SV=2	11	7	0.886228	0.948024	0.914257	0.978008	0.931629	0.0140634
A0A0G2JY08	Myosin XVIIIa OS=Rattus norvegicus GN=Myo18a PE=1 SV=1	7	7	0.971151	1.04878	1.00162	1.08169	1.02581	0.333282
P52944	PDZ and LIM domain protein 1 OS=Rattus norvegicus GN=Pdlim1 PE=1 SV=4	3	3	1.04778	1.01951	1.03116	1.00334	1.02545	0.0349493
[truncated: 1,602 more rows]

## Sheet: Anx-Sus
Uniprot accession	Protein description	Peptides	Unique peptides	119/113 ratio	121/114 ratio	119/113 ratio	121/114 ratio	Average ratio	P-value
Q62829	Serine/threonine-protein kinase PAK 3 OS=Rattus norvegicus GN=Pak3 PE=1 SV=1	7	1	1.20603	1.1608	1.31868	1.26923	1.23869	0.000466907
Q5RJK9	Polymerase (RNA) I polypeptide C OS=Rattus norvegicus GN=Polr1c PE=1 SV=1	1	1	0.636364	0.663102	0.730061	0.760736	0.697566	4.41327e-05
D3ZUL1	Coiled-coil domain-containing 124 OS=Rattus norvegicus GN=Ccdc124 PE=1 SV=1	2	2	0.731132	0.910377	0.72093	0.897674	0.815029	0.0114712
D3ZTT7	Sad1 and UNC84 domain-containing 2 OS=Rattus norvegicus GN=Sun2 PE=1 SV=1	3	3	0.725191	0.870229	0.788382	0.946058	0.832465	0.0131109
A0A0G2JYI7	Ubiquitin-associated protein 2 OS=Rattus norvegicus GN=Ubap2 PE=1 SV=1	2	2	1.19307	1.26238	1.21717	1.28788	1.24012	3.02598e-05
D4A8E7	COMM domain-containing 6 OS=Rattus norvegicus GN=Commd6 PE=1 SV=1	1	1	0.855219	0.777778	0.830065	0.754902	0.804491	0.000148442
D3ZWX4	NCK-interacting protein with SH3 domain OS=Rattus norvegicus GN=Nckipsd PE=1 SV=3	2	2	1.17427	1.34855	1.1551	1.32653	1.25111	0.00245958
P61227	Ras-related protein Rap-2b OS=Rattus norvegicus GN=Rap2b PE=2 SV=1	2	2	0.589888	0.646067	0.795455	0.871212	0.725655	0.00558927
Q9EPT8	Chloride intracellular channel protein 5 OS=Rattus norvegicus GN=Clic5 PE=1 SV=1	2	1	0.724638	0.905797	0.634921	0.793651	0.764752	0.00624212
P84060	Dystrobrevin beta OS=Rattus norvegicus GN=Dtnb PE=1 SV=2	4	1	1.25784	1.17073	1.37262	1.27757	1.26969	0.000625741
B2GV06	Succinyl-CoA:3-ketoacid coenzyme A transferase 1, mitochondrial OS=Rattus norvegicus GN=Oxct1 PE=1 SV=1	1	1	0.778338	0.811083	0.755501	0.787286	0.783052	1.42767e-06
Q5XIB5	Coiled-coil domain-containing protein 86 OS=Rattus norvegicus GN=Ccdc86 PE=1 SV=1	1	1	0.773537	0.949109	0.690909	0.847727	0.815321	0.0151608
Q5U3Z0	UPF0769 protein C21orf59 homolog OS=Rattus norvegicus PE=1 SV=1	1	1	1.12593	1.3	1.17375	1.35521	1.23872	0.00425066
B0BN78	RCG49239 OS=Rattus norvegicus GN=Taf7 PE=1 SV=1	1	1	0.905371	0.757033	0.882793	0.738155	0.820838	0.00571965
Q9JK59	BAK protein OS=Rattus norvegicus GN=Bak1 PE=2 SV=1	1	1	0.191039	0.230865	0.617706	0.746479	0.446522	0.00721133
Q4V8B3	Mediator of RNA polymerase II transcription subunit 24 OS=Rattus norvegicus GN=Med24 PE=1 SV=1	1	1	0.716707	0.854722	0.785146	0.93634	0.823228	0.00944524
Q63159	Ubiquinone biosynthesis O-methyltransferase, mitochondrial OS=Rattus norvegicus GN=Coq3 PE=2 SV=2	2	2	1.10345	1.18621	1.30435	1.40217	1.24904	0.00901085
D3ZVD8	Histone deacetylase OS=Rattus norvegicus GN=Hdac6 PE=1 SV=2	2	2	0.726277	0.797445	0.758095	0.832381	0.77855	7.37234e-05
D3Z8X6	Deltex E3 ubiquitin ligase 3L OS=Rattus norvegicus GN=Dtx3l PE=1 SV=1	2	2	0.415119	0.441645	0.599617	0.637931	0.523578	0.000141241
D4A9U9	Melanoregulin OS=Rattus norvegicus GN=Mreg PE=1 SV=1	1	1	0.847594	0.882353	0.769417	0.800971	0.825084	0.000419476
Q5Y4N8	Adhesion G protein-coupled receptor E2 OS=Rattus norvegicus GN=Adgre1 PE=2 SV=1	1	1	1.53306	1.45455	1.38433	1.31343	1.42134	0.000108653
A0A0H2UHN2	Isopentenyl-diphosphate Delta-isomerase 1 OS=Rattus norvegicus GN=Idi1 PE=1 SV=1	1	1	1.10777	1.30326	1.11055	1.30653	1.20703	0.0105349
Q99MB4	COBW domain-containing protein 1 OS=Rattus norvegicus GN=Cbwd1 PE=2 SV=2	2	2	0.837366	0.751344	0.827357	0.742364	0.789608	0.000147905
G3V8T3	Adenosine deaminase, RNA-specific, isoform CRA_b OS=Rattus norvegicus GN=Adar PE=1 SV=1	3	3	0.79704	0.849894	0.809013	0.862661	0.829652	3.7408e-05
D3ZF39	UDP-N-acetylglucosamine pyrophosphorylase 1 OS=Rattus norvegicus GN=Uap1 PE=1 SV=2	1	1	0.891941	0.851648	0.813022	0.776294	0.833226	0.000536797
D4ADS6	Integrator complex subunit 7 OS=Rattus norvegicus GN=Ints7 PE=1 SV=1	1	1	0.738964	0.934741	0.701275	0.887067	0.815512	0.0170789
D4ADT5	DEAD (Asp-Glu-Ala-Asp) box polypeptide 58 (Predicted) OS=Rattus norvegicus GN=Ddx58 PE=1 SV=3	2	2	0.739496	0.771709	0.814815	0.850309	0.794082	0.000146802
D4A958	Coiled-coil domain-containing 54 OS=Rattus norvegicus GN=Ccdc54 PE=4 SV=1	1	1	0.728083	0.745914	0.701001	0.718169	0.723292	1.01161e-07
Q5XII9	Mitochondrial fission regulator 1-like OS=Rattus norvegicus GN=Mtfr1l PE=1 SV=1	2	2	0.694868	0.843273	0.74003	0.89808	0.794063	0.00445071
M0R660	Glyceraldehyde-3-phosphate dehydrogenase OS=Rattus norvegicus PE=1 SV=1	12	1	1.18166	1.60272	1.31321	1.78113	1.46968	0.0135983
D3ZCQ2	ALG11, alpha-1,2-mannosyltransferase OS=Rattus norvegicus GN=Alg11 PE=1 SV=2	1	1	0.736402	0.785216	0.814815	0.868827	0.801315	0.000371517
A0A0H2UHF8	Alpha-1-acid glycoprotein OS=Rattus norvegicus GN=Orm1 PE=1 SV=1	1	1	1.37465	1.26761	1.23858	1.14213	1.25574	0.00175445
D3ZKX1	RCG48807, isoform CRA_a OS=Rattus norvegicus GN=Washc3 PE=1 SV=1	1	1	0.689223	0.68797	0.652432	0.651246	0.670218	7.39368e-08
A0A0A0MY22	Sialate O-acetylesterase OS=Rattus norvegicus GN=Siae PE=1 SV=1	1	1	0.780282	0.866197	0.795977	0.883621	0.831519	0.00057887
D4A5T8	Periplakin OS=Rattus norvegicus GN=Ppl PE=1 SV=1	3	3	0.679201	0.784959	0.676815	0.782201	0.730794	0.00011715
F1M241	DENN domain-containing 1A OS=Rattus norvegicus GN=Dennd1a PE=1 SV=2	1	1	1.72656	1.325	1.56738	1.20284	1.45544	0.00833973
A0A0G2K9L0	Ribonuclease T2 OS=Rattus norvegicus GN=Rnaset2 PE=1 SV=1	1	1	0.459384	0.63212	0.648221	0.891963	0.657922	0.00850349
Q5M883	Chloride intracellular channel protein 2 OS=Rattus norvegicus GN=Clic2 PE=2 SV=1	1	1	0.64581	0.73743	0.829268	0.946915	0.789856	0.0171468
D4AEE9	Transcription elongation factor 1 homolog OS=Rattus norvegicus GN=Elof1 PE=3 SV=1	1	1	1.34973	1.125	1.2963	1.08046	1.21287	0.0170969
B3EY86	Lipocalin 11 OS=Rattus norvegicus GN=Lcn11 PE=2 SV=1	2	2	0.705671	0.749775	0.772414	0.82069	0.762137	6.00321e-05
D3ZVU6	AVL9 cell migration-associated OS=Rattus norvegicus GN=Avl9 PE=1 SV=1	1	1	1.26331	1.27311	1.13317	1.14196	1.20289	0.00171834
A0A0G2JSP8	Creatine kinase M-type OS=Rattus norvegicus GN=Ckm PE=1 SV=1	3	2	0.751163	0.768217	0.69863	0.714492	0.733125	3.02647e-06
F1LND1	Component of oligomeric golgi complex 1 OS=Rattus norvegicus GN=Cog1 PE=1 SV=1	2	2	0.732632	0.9	0.744385	0.914439	0.822864	0.0110168
D3ZI42	Leucine-rich repeat and sterile alpha motif-containing 1 OS=Rattus norvegicus GN=Lrsam1 PE=1 SV=3	6	6	0.908341	0.836847	0.79855	0.735697	0.819859	0.00248322
F1M661	BMP-binding endothelial regulator OS=Rattus norvegicus GN=Bmper PE=4 SV=2	1	1	1.16381	1.42571	1.12213	1.37466	1.27158	0.0113811
A0A0G2K896	Similar to RIKEN cDNA 1300017J02 OS=Rattus norvegicus GN=RGD1310507 PE=1 SV=1	2	1	0.859498	0.861068	0.763066	0.76446	0.812023	0.000517258
P16296	Coagulation factor IX OS=Rattus norvegicus GN=F9 PE=2 SV=2	1	1	1.25754	1.27136	1.16939	1.18224	1.22013	0.000144362
Q5BK37	RCG53872, isoform CRA_a OS=Rattus norvegicus GN=Arhgef1 PE=2 SV=1	3	3	1.2199	1.38133	1.24156	1.40586	1.31216	0.000594332
B0BN56	28S ribosomal protein S31, mitochondrial OS=Rattus norvegicus GN=Mrps31 PE=2 SV=1	2	2	0.690729	0.679406	0.648074	0.63745	0.663915	1.84815e-07
A0A0G2JWR2	Protein kinase C and casein kinase substrate in neurons protein 1 OS=Rattus norvegicus GN=Pacsin1 PE=1 SV=1	2	2	0.86819	0.796719	0.813839	0.746842	0.806398	0.00024485
E9PTX3	Hook microtubule-tethering protein 2 OS=Rattus norvegicus GN=Hook2 PE=1 SV=2	1	1	0.876118	0.920165	0.744009	0.781414	0.830427	0.00599402
D4A9M7	Autophagy-related 16-like 2 OS=Rattus norvegicus GN=Atg16l2 PE=1 SV=1	1	1	1.12647	1.30479	1.40588	1.62843	1.36639	0.0128418
P04916	Retinol-binding protein 4 OS=Rattus norvegicus GN=Rbp4 PE=1 SV=1	1	1	0.724065	0.643497	0.860989	0.765185	0.748434	0.00143112
A0A140TAC3	Epsin-1 OS=Rattus norvegicus GN=Epn1 PE=1 SV=1	1	1	0.749118	0.759194	0.865541	0.877183	0.812759	0.00150038
A0A0G2JSS1	Integrin-linked kinase-associated serine/threonine phosphatase 2C OS=Rattus norvegicus GN=Ilkap PE=1 SV=1	3	3	0.852151	0.758602	0.834211	0.742632	0.796899	0.000295712
P47819	Glial fibrillary acidic protein OS=Rattus norvegicus GN=Gfap PE=1 SV=2	7	5	1.36414	1.21216	1.37782	1.22431	1.29461	0.000555223
Q6P6Q2	Keratin, type II cytoskeletal 5 OS=Rattus norvegicus GN=Krt5 PE=1 SV=1	3	1	1.12704	1.40604	1.16791	1.45703	1.2895	0.013068
A0A0G2JX25	GMP reductase OS=Rattus norvegicus GN=Gmpr2 PE=1 SV=1	2	2	0.773413	0.761111	0.90357	0.889198	0.831823	0.00415738
F1M3W5	Dmx-like 2 OS=Rattus norvegicus GN=Dmxl2 PE=1 SV=3	4	4	0.692283	0.698292	0.886953	0.894652	0.793045	0.0105227
D3ZL21	Similar to TP53-regulating kinase (p53-related protein kinase) (Nori-2) OS=Rattus norvegicus GN=LOC685619 PE=4 SV=3	3	3	0.739256	0.789732	0.827041	0.883511	0.809885	0.000778919
Q99MI5	Spermidine synthase OS=Rattus norvegicus GN=LOC100912604 PE=1 SV=1	3	3	0.805677	0.749181	0.909988	0.846178	0.827756	0.00225209
Q3S4A4	ADP-ribosylation factor GTPase activating protein 1 heart isoform OS=Rattus norvegicus GN=Arfgap1 PE=1 SV=1	6	6	0.664997	0.681333	0.84477	0.865523	0.764156	0.00425586
A0A0G2JVQ5	Kininogen 1 OS=Rattus norvegicus GN=Kng1 PE=1 SV=1	6	2	1.36515	1.2966	1.24831	1.18563	1.27392	0.000358673
P62282	40S ribosomal protein S11 OS=Rattus norvegicus GN=Rps11 PE=1 SV=3	6	1	1.1959	1.09496	1.41741	1.29777	1.25151	0.0108226
Q5PQU1	Kininogen 1 OS=Rattus norvegicus GN=Kng2 PE=2 SV=1	5	3	1.56582	1.24598	1.46243	1.16371	1.35948	0.00841745
A0A0F7RQ24	Glycoprotein hormones alpha chain OS=Rattus norvegicus GN=Cga PE=3 SV=1	1	1	1.31244	1.21976	1.28575	1.19496	1.25323	9.26406e-05
A0A0G2K926	Alpha-1-inhibitor III OS=Rattus norvegicus GN=LOC297568 PE=1 SV=1	16	6	0.883385	0.893577	0.736319	0.744814	0.814524	0.00490147
F1LMW7	Myristoylated alanine-rich C-kinase substrate OS=Rattus norvegicus GN=Marcks PE=1 SV=3	9	8	1.15472	1.46065	1.1841	1.49782	1.32432	0.0112963
Q8K422	Pro-opiomelanocortin OS=Rattus norvegicus GN=Pomc PE=2 SV=1	6	6	1.17992	1.25749	1.31835	1.40502	1.2902	0.000888484
P10362	Secretogranin-2 OS=Rattus norvegicus GN=Scg2 PE=1 SV=1	25	25	1.16635	1.23456	1.208	1.27864	1.22189	8.13543e-05
F1LRC6	Nucleoporin 188 OS=Rattus norvegicus GN=Nup188 PE=1 SV=2	1	1	0.746479	1.12676	0.868852	1.31148	1.01339	0.919518
Q66HD2	Kelch-like protein 36 OS=Rattus norvegicus GN=Klhl36 PE=2 SV=1	1	1	0.688312	1.12987	1.29268	2.12195	1.3082	0.343569
G3V602	Xenotropic and polytropic retrovirus receptor 1 OS=Rattus norvegicus GN=Xpr1 PE=1 SV=1	1	1	0.596491	0.707602	1.07368	1.27368	0.912865	0.600454
M0R5P8	ADAM metallopeptidase domain 22 OS=Rattus norvegicus GN=Adam22 PE=1 SV=2	1	1	0.838323	0.724551	1.2844	1.11009	0.989342	0.936019
B1WC44	60S ribosomal export protein NMD3 OS=Rattus norvegicus GN=Nmd3 PE=2 SV=1	2	2	1.16892	1.02027	1.35156	1.17969	1.18011	0.037589
B2GV41	Ubiquitin specific protease 39 (Predicted), isoform CRA_b OS=Rattus norvegicus GN=Usp39 PE=1 SV=1	2	2	0.859155	1.05634	0.813333	1	0.932207	0.281907
B2GV97	O-phosphoseryl-tRNA(Sec) selenium transferase OS=Rattus norvegicus GN=Sepsecs PE=1 SV=1	3	3	0.835616	1.17808	0.739394	1.04242	0.948879	0.624621
G3V9L7	Glycerophosphodiester phosphodiesterase domain-containing 5 OS=Rattus norvegicus GN=Gdpd5 PE=4 SV=2	1	1	0.768421	1.21053	0.843931	1.32948	1.03809	0.79025
P11275	Calcium/calmodulin-dependent protein kinase type II subunit alpha OS=Rattus norvegicus GN=Camk2a PE=1 SV=1	2	1	0.57971	0.913043	0.634921	1	0.781919	0.0785241
D4A857	Importin 9 OS=Rattus norvegicus GN=Ipo9 PE=1 SV=2	1	1	1.17073	1.21951	0.927536	0.966184	1.07099	0.36705
P47727	Carbonyl reductase [NADPH] 1 OS=Rattus norvegicus GN=Cbr1 PE=1 SV=2	12	1	0.876623	1.16883	0.75	1	0.948864	0.587829
Q5FVH4	AKT-interacting protein OS=Rattus norvegicus GN=Aktip PE=1 SV=1	1	1	0.878571	1.17857	0.706897	0.948276	0.928079	0.489382
P19332-3	Isoform Tau-C of Microtubule-associated protein tau OS=Rattus norvegicus GN=Mapt	6	1	0.88	0.993333	0.830189	0.937107	0.910157	0.043757
F1M4W7	Cleavage stimulation factor subunit 3 OS=Rattus norvegicus GN=Cstf3 PE=1 SV=3	2	2	0.918129	1.49708	0.902299	1.47126	1.19719	0.279241
D3ZUT8	Protein NDRG4 OS=Rattus norvegicus GN=Ndrg4 PE=1 SV=1	2	2	0.89759	0.933735	0.832402	0.865922	0.882412	0.00162482
D4A629	Protein-L-isoaspartate (D-aspartate) O-methyltransferase domain-containing 1 OS=Rattus norvegicus GN=Pcmtd1 PE=1 SV=1	2	2	0.979798	1.26263	0.788618	1.01626	1.01183	0.907299
Q6AYT0	Quinone oxidoreductase OS=Rattus norvegicus GN=Cryz PE=2 SV=1	1	1	0.946809	1.01596	0.956989	1.02688	0.986659	0.535427
F7F0Y6	Cytochrome P450, family 4, subfamily f, polypeptide 37 OS=Rattus norvegicus GN=Cyp4f37 PE=3 SV=2	1	1	1.10106	0.952128	1.32692	1.14744	1.13189	0.138487
D4A414	COX15 cytochrome c oxidase assembly homolog OS=Rattus norvegicus GN=Cox15 PE=1 SV=1	1	1	0.918129	1.16374	0.830688	1.05291	0.991367	0.910236
M0R7I0	Importin subunit alpha OS=Rattus norvegicus GN=LOC100359600 PE=3 SV=1	2	2	0.772727	0.863636	0.934066	1.04396	0.903596	0.143278
Q4V7C1	FGFR1 oncogene partner OS=Rattus norvegicus GN=Fgfr1op PE=1 SV=1	1	1	0.961957	1.07065	1.02907	1.14535	1.05176	0.226379
F1M6E2	Rho GTPase-activating protein 36 OS=Rattus norvegicus GN=Arhgap36 PE=4 SV=2	2	2	0.656566	1.19697	0.643564	1.17327	0.917592	0.61306
Q3MIB4	Lon protease homolog 2, peroxisomal OS=Rattus norvegicus GN=Lonp2 PE=1 SV=2	2	2	0.877049	1.16393	0.930435	1.23478	1.05155	0.576141
D4A4R1	Echinoderm microtubule-associated protein-like 3 OS=Rattus norvegicus GN=Eml3 PE=1 SV=2	1	1	1.28	1.632	1.09589	1.39726	1.35129	0.0203431
B1WBU3	PCOLCE2 protein OS=Rattus norvegicus GN=PCOLCE2 PE=2 SV=1	1	1	0.814634	0.980488	1.3254	1.59524	1.17894	0.345593
F1LMX1	Myc box-dependent-interacting protein 1 OS=Rattus norvegicus GN=Bin1 PE=1 SV=2	2	2	0.653846	0.89011	0.782895	1.06579	0.84816	0.13209
Q156J1	Bcl-2-interacting death suppressor OS=Rattus norvegicus PE=2 SV=1	3	3	0.957746	1.28169	0.804734	1.07692	1.03027	0.773689
D3ZZQ6	Integrator complex subunit 4 OS=Rattus norvegicus GN=Ints4 PE=1 SV=1	4	4	0.708571	0.834286	0.832215	0.979866	0.838734	0.0270766
Q5XIS7	Ubiquitin-associated protein 1 OS=Rattus norvegicus GN=Ubap1 PE=2 SV=1	1	1	1.06989	1.01613	1.25949	1.1962	1.13543	0.0519342
F1LMA5	Friend virus susceptibility 1 OS=Rattus norvegicus GN=Fv1 PE=4 SV=1	2	2	0.782772	0.853933	0.86722	0.946058	0.862496	0.00628912
D4ACM2	MAD2 (Mitotic arrest deficient, homolog)-like 1 (Yeast) (Predicted), isoform CRA_a OS=Rattus norvegicus GN=Mad2l1 PE=1 SV=1	2	2	1.13889	1.1875	0.788462	0.822115	0.984241	0.884552
O89035	Mitochondrial dicarboxylate carrier OS=Rattus norvegicus GN=Slc25a10 PE=1 SV=1	1	1	0.671569	1.27451	0.655502	1.24402	0.9614	0.829991
Q66H20-2	Isoform 2 of Polypyrimidine tract-binding protein 2 OS=Rattus norvegicus GN=Ptbp2	2	1	0.760274	1.00685	0.716129	0.948387	0.85791	0.0912307
G3V709	Nicotinate phosphoribosyltransferase OS=Rattus norvegicus GN=Naprt PE=1 SV=1	1	1	0.744681	0.930851	0.880503	1.10063	0.914166	0.287448
D4A3M7	BSD domain-containing 1 OS=Rattus norvegicus GN=Bsdc1 PE=1 SV=3	2	2	0.714953	0.925234	0.905325	1.1716	0.929277	0.478727
D4A401	Testis expressed gene 10 (Predicted) OS=Rattus norvegicus GN=Tex10 PE=1 SV=2	1	1	0.890244	1.19106	0.939914	1.25751	1.06968	0.472186
Q6P6S0	Synaptosomal-associated protein 47 OS=Rattus norvegicus GN=Snap47 PE=2 SV=1	2	1	0.90099	1.0099	1.04598	1.17241	1.03232	0.58449
Q5XIB2	Peptidyl-prolyl cis-trans isomerase CWC27 homolog OS=Rattus norvegicus GN=Cwc27 PE=1 SV=1	2	2	1.06349	0.746032	1.21818	0.854545	0.970563	0.789793
B2GV55	Ubiquitin-conjugating enzyme E2 Q1 OS=Rattus norvegicus GN=Ube2q1 PE=1 SV=1	1	1	0.964072	1.42515	1.18382	1.75	1.33076	0.097299
D4A7I6	Similar to CG13957-PA OS=Rattus norvegicus GN=Washc4 PE=1 SV=1	2	2	0.826484	1.00913	0.815315	0.995495	0.911607	0.143187
A0A0G2JVG4	Peroxisomal trans-2-enoyl-CoA reductase OS=Rattus norvegicus GN=Pecr PE=1 SV=1	2	2	0.995413	0.880734	0.960177	0.849558	0.92147	0.0597756
Q5M965	Probable tRNA(His) guanylyltransferase OS=Rattus norvegicus GN=Thg1l PE=2 SV=1	1	1	0.80695	1.10039	0.836	1.14	0.970834	0.748337
Q5XFW6	WD repeat-containing protein 6 OS=Rattus norvegicus GN=Wdr6 PE=1 SV=2	1	1	0.901408	1.15493	0.695652	0.891304	0.910824	0.380089
Q5M969	N-acylneuraminate-9-phosphatase OS=Rattus norvegicus GN=Nanp PE=1 SV=1	1	1	0.922156	1.28743	0.987179	1.37821	1.14374	0.244869
C0IXW5	Furry-like protein OS=Rattus norvegicus GN=Fry PE=2 SV=1	1	1	1.1809	1.29146	0.910853	0.996124	1.09483	0.314657
Q6P686	Osteoclast-stimulating factor 1 OS=Rattus norvegicus GN=Ostf1 PE=1 SV=1	2	2	0.681223	0.969432	0.718894	1.02304	0.848148	0.129839
G3V6B8	RCG38965, isoform CRA_a OS=Rattus norvegicus GN=Tsr2 PE=1 SV=1	2	2	0.724771	1.07339	0.686957	1.01739	0.875628	0.255625
D4A2B0	DNA polymerase delta-interacting protein 3 OS=Rattus norvegicus GN=Poldip3 PE=1 SV=1	1	1	1.01327	1.18142	1.40491	1.63804	1.30941	0.0628896
B1WBV1	Axin interactor, dorsalization-associated OS=Rattus norvegicus GN=Aida PE=1 SV=1	1	1	1.11885	0.995902	1.03802	0.923954	1.01918	0.654232
Q5XID1	Anamorsin OS=Rattus norvegicus GN=Ciapin1 PE=1 SV=1	3	3	0.61	1.11	0.646643	1.17668	0.88583	0.473958
Q5U204	Ragulator complex protein LAMTOR3 OS=Rattus norvegicus GN=Lamtor3 PE=2 SV=1	2	2	0.869697	0.772727	1.02867	0.913978	0.896269	0.0984926
D4A2D8	LSM7 homolog, U6 small nuclear RNA and mRNA degradation-associated OS=Rattus norvegicus GN=Lsm7 PE=1 SV=1	3	3	0.955882	1.17157	0.83691	1.02575	0.997528	0.972933
F1M8S4	Ubiquitin-specific peptidase 35 OS=Rattus norvegicus GN=Usp35 PE=1 SV=2	2	2	1.02212	1.08407	0.966527	1.0251	1.02446	0.347621
A0A0G2K189	Secernin 3 OS=Rattus norvegicus GN=Scrn3 PE=1 SV=1	1	1	0.781116	0.957082	0.938144	1.14948	0.956457	0.584922
G3V9E7	LIM homeobox 3 OS=Rattus norvegicus GN=Lhx3 PE=4 SV=1	1	1	1.02963	1.06667	0.958621	0.993103	1.01201	0.624576
B2RZB8	Proteasome assembly chaperone 4 OS=Rattus norvegicus GN=Psmg4 PE=2 SV=1	1	1	1.05687	0.905213	1.00905	0.864253	0.958847	0.39253
P04177	Tyrosine 3-monooxygenase OS=Rattus norvegicus GN=Th PE=1 SV=3	2	2	0.784264	0.86802	1.00325	1.11039	0.94148	0.448257
Q6AY46	tRNA (adenine(58)-N(1))-methyltransferase catalytic subunit TRMT61A OS=Rattus norvegicus GN=Trmt61a PE=2 SV=1	1	1	0.855469	1.03125	0.74744	0.901024	0.883796	0.0953456
D4AE75	POP1 homolog, ribonuclease P/MRP subunit OS=Rattus norvegicus GN=Pop1 PE=1 SV=1	1	1	1.30544	1.03766	1.19084	0.946565	1.12013	0.182578
D3ZAG3	Microtubule-associated protein 9 OS=Rattus norvegicus GN=Map9 PE=1 SV=1	1	1	1.02575	1.14163	0.875458	0.974359	1.0043	0.94065
B2RYI8	Papss1 protein OS=Rattus norvegicus GN=Papss1 PE=2 SV=1	3	3	0.760252	1.03155	0.85461	1.15957	0.951496	0.60654
F1M3P6	Protein SCAI OS=Rattus norvegicus GN=Scai PE=1 SV=2	3	3	0.82971	0.905797	0.877395	0.957854	0.892689	0.00708499
F1M6V0	Neurobeachin-like 1 OS=Rattus norvegicus GN=Nbeal1 PE=1 SV=3	1	1	0.880658	1.03292	1.0439	1.22439	1.04547	0.541813
F1M9B2	Insulin-like growth factor binding protein 7, isoform CRA_b OS=Rattus norvegicus GN=Igfbp7 PE=1 SV=2	1	1	1.10044	0.842795	1.09565	0.83913	0.969504	0.695435
F1LSM0	Ubiquitin-specific peptidase 24 OS=Rattus norvegicus GN=Usp24 PE=1 SV=2	1	1	1.23529	1.0362	1.12346	0.942387	1.08433	0.225524
O35165	Golgi SNAP receptor complex member 2 OS=Rattus norvegicus GN=Gosr2 PE=1 SV=2	1	1	0.983402	1.17427	0.762058	0.909968	0.957426	0.636987
A0A0G2JTJ9	RCG50655 OS=Rattus norvegicus GN=Tfcp2 PE=1 SV=1	1	1	1.22222	1.86508	0.6875	1.04911	1.20598	0.435071
B2RZ97	LOC684322 protein OS=Rattus norvegicus GN=Kcmf1 PE=2 SV=1	2	2	0.9	0.977273	0.758621	0.823755	0.864912	0.0289545
Q63356	Unconventional myosin-Ie OS=Rattus norvegicus GN=Myo1e PE=1 SV=1	3	3	1.04207	0.873786	1.13781	0.954064	1.00193	0.973985
F1M9V3	Similar to Alpha enolase (2-phospho-D-glycerate hydro-lyase) OS=Rattus norvegicus GN=RGD1559534 PE=4 SV=1	2	1	1.16535	1.18504	1.03136	1.04878	1.10763	0.0340263
D3ZFY0	Selenophosphate synthetase 1 OS=Rattus norvegicus GN=Sephs1 PE=1 SV=1	2	2	0.911315	0.978593	0.955128	1.02564	0.967669	0.223654
A0A0G2JTD1	Regulation of nuclear pre-mRNA domain-containing 2 OS=Rattus norvegicus GN=Rprd2 PE=1 SV=1	2	2	0.941645	0.811671	1.3447	1.15909	1.06428	0.604941
F1M801	Anaphase promoting complex subunit 1 (Predicted) OS=Rattus norvegicus GN=Anapc1 PE=1 SV=2	4	4	0.890282	1	0.928105	1.04248	0.965218	0.350548
G3V818	Alpha-parvin OS=Rattus norvegicus GN=Parva PE=1 SV=1	3	2	0.907407	1.06019	0.875	1.02232	0.966229	0.476597
Q68FQ2	Junctional adhesion molecule C OS=Rattus norvegicus GN=Jam3 PE=1 SV=1	1	1	0.829268	1.0453	0.97541	1.22951	1.01987	0.819009
Q6QI88	LRRG00120 OS=Rattus norvegicus GN=Tmed5 PE=1 SV=1	1	1	0.815498	1.02952	0.924686	1.16736	0.984267	0.84091
D4A333	Tetratricopeptide repeat domain 21B OS=Rattus norvegicus GN=Ttc21b PE=4 SV=3	2	2	0.948052	1.23377	0.823308	1.07143	1.01914	0.834401
F1LST0	HEAT repeat-containing 5B OS=Rattus norvegicus GN=Heatr5b PE=1 SV=2	2	2	0.824841	1.04777	0.832797	1.05788	0.940822	0.395765
Q05BA4	Myadm protein OS=Rattus norvegicus GN=Myadm PE=1 SV=1	2	2	1.36576	1.03891	1.14706	0.872549	1.10607	0.344305
Q6P796	Serine peptidase inhibitor, Kunitz type, 2 OS=Rattus norvegicus GN=Spint2 PE=1 SV=1	1	1	1.04583	1.15	1.03292	1.1358	1.09114	0.0232819
O35254	Golgi reassembly-stacking protein 1 OS=Rattus norvegicus GN=Gorasp1 PE=1 SV=4	1	1	0.922807	1.16842	1.03543	1.31102	1.10942	0.239848
F1LZW6	Solute carrier family 25 member 13 OS=Rattus norvegicus GN=Slc25a13 PE=1 SV=2	7	4	0.807122	0.836795	1.00741	1.04444	0.923942	0.249586
B5DF29	Replication factor C (Activator 1) 5 OS=Rattus norvegicus GN=Rfc5 PE=1 SV=1	1	1	0.895911	0.903346	0.857651	0.864769	0.880419	4.16431e-05
P51792	H(+)/Cl(-) exchange transporter 3 OS=Rattus norvegicus GN=Clcn3 PE=2 SV=2	3	3	1.22932	1.23684	0.900826	0.906336	1.06833	0.499608
M0R919	Prefoldin subunit 3 OS=Rattus norvegicus GN=Vbp1 PE=1 SV=2	2	2	1.00601	1.18919	0.876963	1.03665	1.0272	0.686224
A0A0G2K681	CAP-Gly domain-containing linker protein 1 OS=Rattus norvegicus GN=Clip1 PE=1 SV=1	4	2	0.992157	1.00784	0.988281	1.00391	0.998047	0.689588
B0K030	DnaJ (Hsp40) homolog, subfamily B, member 1 (Predicted), isoform CRA_b OS=Rattus norvegicus GN=Dnajb1 PE=1 SV=1	2	2	1.06809	1.32766	0.877622	1.09091	1.09107	0.361541
B5DEF3	Gamma-glutamyl carboxylase OS=Rattus norvegicus GN=Ggcx PE=1 SV=1	1	1	1.02542	1.44492	0.886447	1.24908	1.15147	0.264485
B1WBZ7	GPN-loop GTPase 1 OS=Rattus norvegicus GN=Gpn1 PE=1 SV=1	1	1	1.12628	1.00683	1.07492	0.960912	1.04223	0.291376
A0A0G2K132	Formin-like 2 OS=Rattus norvegicus GN=Fmnl2 PE=1 SV=1	2	2	1.27551	1.0051	1.00402	0.791165	1.01895	0.854839
Q6AXX4	Something about silencing protein 10 OS=Rattus norvegicus GN=Utp3 PE=1 SV=1	1	1	1.10526	1.25965	1.12903	1.28674	1.19517	0.00522853
A0A0G2K714	Endophilin-B1 OS=Rattus norvegicus GN=Sh3glb1 PE=1 SV=1	4	3	0.984326	0.896552	1.0129	0.922581	0.95409	0.13863
D3ZC55	Heat shock 70kDa protein 12A (Predicted), isoform CRA_a OS=Rattus norvegicus GN=Hspa12a PE=1 SV=1	4	4	0.95107	1.15291	0.824934	1	0.982227	0.80198
Q80WK7	Equilibrative nucleoside transporter 3 OS=Rattus norvegicus GN=Slc29a3 PE=1 SV=2	1	1	1.38624	1.30159	1.12446	1.05579	1.21702	0.0297838
A0A0G2K867	Otoferlin OS=Rattus norvegicus GN=Otof PE=4 SV=1	1	1	0.970674	0.744868	1.06431	0.81672	0.899143	0.213311
A0A0G2K429	Adenylate cyclase 6, isoform CRA_a OS=Rattus norvegicus GN=Adcy6 PE=1 SV=1	1	1	1.12892	1.04878	0.955752	0.887906	1.00534	0.922692
G3V8W9	Similar to CG12279-PA OS=Rattus norvegicus GN=Tstd3 PE=1 SV=1	1	1	0.856643	1.07692	0.76087	0.956522	0.912739	0.245207
Q99P74	Ras-related protein Rab-27B OS=Rattus norvegicus GN=Rab27b PE=2 SV=3	4	2	0.742105	0.860526	0.955932	1.10847	0.91676	0.323707
Q5D006	Ubiquitin carboxyl-terminal hydrolase 11 OS=Rattus norvegicus GN=Usp11 PE=1 SV=1	4	4	1.01333	1.09667	0.990228	1.07166	1.04297	0.133542
D3Z9K4	Pleckstrin homology domain-containing O2 OS=Rattus norvegicus GN=Plekho2 PE=1 SV=2	1	1	0.886719	1.03906	1.2337	1.44565	1.15128	0.258165
Q7M0E7	39S ribosomal protein L14, mitochondrial OS=Rattus norvegicus GN=Mrpl14 PE=1 SV=2	1	1	0.890909	1.09697	0.818942	1.00836	0.953794	0.48194
A0A0G2K0I1	Spermatogenesis-associated 5 OS=Rattus norvegicus GN=Spata5 PE=1 SV=1	1	1	1.10294	1.00735	1.0989	1.00366	1.05321	0.101782
Q6QZQ4	Vimentin-type intermediate filament-associated coiled-coil protein OS=Rattus norvegicus GN=Vmac PE=2 SV=1	3	3	0.720588	1.04412	0.758514	1.09907	0.905573	0.367069
Q6AY55	Dephospho-CoA kinase domain-containing protein OS=Rattus norvegicus GN=Dcakd PE=2 SV=1	1	1	1.03779	0.973837	0.94695	0.888594	0.961793	0.263257
G3V846	Amino acid transporter OS=Rattus norvegicus GN=Slc1a3 PE=1 SV=1	3	3	1.02208	1.23028	1.11724	1.34483	1.17861	0.0431025
Q9EQZ1	TSC22 domain family protein 3 OS=Rattus norvegicus GN=Tsc22d3 PE=1 SV=1	1	1	1.05438	1.15106	1.09748	1.19811	1.12526	0.00712053
F1M9F9	Jouberin OS=Rattus norvegicus GN=Ahi1 PE=1 SV=2	3	3	1.0029	1.21739	1.02976	1.25	1.12501	0.095851
F1LPD6	3-ketoacyl-CoA thiolase B, peroxisomal OS=Rattus norvegicus GN=Acaa1a PE=1 SV=2	2	2	0.867925	0.924528	0.851852	0.907407	0.887928	0.000564068
F1LYX9	Desmoglein 2 OS=Rattus norvegicus GN=Dsg2 PE=1 SV=2	1	1	1.00292	1.1462	0.952778	1.08889	1.0477	0.312033
D4A5X1	Stromal interaction molecule 2 OS=Rattus norvegicus GN=Stim2 PE=1 SV=2	1	1	0.840361	1.11747	0.799427	1.06304	0.955074	0.59146
Q5VLR6	BWK3 OS=Rattus norvegicus GN=LOC366772 PE=2 SV=1	1	1	0.765306	0.979592	0.647948	0.829374	0.805555	0.0306142
A0A0G2JY12	Paxillin OS=Rattus norvegicus GN=Pxn PE=1 SV=1	1	1	0.921512	0.927326	0.946269	0.952239	0.936836	0.000138401
D3ZXM4	Ecotropic viral integration site 5-like (Fragment) OS=Rattus norvegicus GN=Evi5l PE=4 SV=2	1	1	1.00935	1.3053	0.820253	1.06076	1.04891	0.641734
A0A096MJI4	GRB10-interacting GYF protein 2 (Fragment) OS=Rattus norvegicus GN=Gigyf2 PE=1 SV=1	1	1	1.0094	0.899687	1.16245	1.0361	1.02691	0.635762
D4ACG6	Chromodomain helicase DNA-binding protein 1-like OS=Rattus norvegicus GN=Chd1l PE=1 SV=3	2	1	1.2179	1.24125	1.03987	1.0598	1.1397	0.0368749
G3V6K0	COMM domain containing 5, isoform CRA_a OS=Rattus norvegicus GN=Commd5 PE=1 SV=1	3	3	0.941176	0.815857	1.03081	0.893557	0.920351	0.12695
D3ZUL3	Collagen type VI alpha 1 chain OS=Rattus norvegicus GN=Col6a1 PE=1 SV=1	3	3	1.35501	0.826558	1.47929	0.902367	1.14081	0.418945
H1UBM7	Copine 2 protein OS=Rattus norvegicus GN=Cpne2 PE=2 SV=1	2	1	0.849057	1.09119	0.865385	1.11218	0.979454	0.781372
D3ZHM7	Deoxynucleotidyltransferase, terminal,-interacting protein 2 OS=Rattus norvegicus GN=Dnttip2 PE=1 SV=2	1	1	0.969101	1.0618	1.03916	1.13855	1.05215	0.185818
A0A182DWI7	NAD-dependent protein deacetylase sirtuin-1 OS=Rattus norvegicus GN=Sirt1 PE=4 SV=1	1	1	0.949198	1.13102	0.926893	1.10444	1.02789	0.613396
B5DFI9	Pdk3 protein OS=Rattus norvegicus GN=Pdk3 PE=2 SV=1	1	1	1.06176	1.00588	0.863636	0.818182	0.937366	0.31859
Q499N6	UBX domain-containing protein 1 OS=Rattus norvegicus GN=Ubxn1 PE=3 SV=2	2	2	0.919003	1.05607	0.921875	1.05937	0.989082	0.792231
F1LTR1	WD repeat-containing protein 26 OS=Rattus norvegicus GN=Wdr26 PE=3 SV=2	2	2	1.04281	1.20489	0.899736	1.03958	1.04676	0.481859
Q8R4Z9	Mitofusin-1 OS=Rattus norvegicus GN=Mfn1 PE=1 SV=1	2	2	0.87234	1.12462	0.73028	0.941476	0.917179	0.351129
Q642A9	VPS16 CORVET/HOPS core subunit OS=Rattus norvegicus GN=Vps16 PE=1 SV=1	5	5	0.947514	1.00276	1.02695	1.08683	1.01601	0.599198
M0R3Z8	RCG28930, isoform CRA_b OS=Rattus norvegicus GN=Rbm15 PE=1 SV=2	2	2	0.997354	1.1455	0.887059	1.01882	1.01218	0.825769
D3ZUQ0	RILP-like protein 1 OS=Rattus norvegicus GN=Rilpl1 PE=1 SV=1	1	1	0.94802	0.90099	1.0551	1.00275	0.976715	0.511693
P19643	Amine oxidase [flavin-containing] B OS=Rattus norvegicus GN=Maob PE=1 SV=3	4	4	1.07895	1.08158	0.973872	0.976247	1.02766	0.397632
D3ZEK5	Heparan-sulfate 6-O-sulfotransferase OS=Rattus norvegicus GN=Hs6st2 PE=3 SV=2	1	1	1.00763	1.08906	0.75717	0.818356	0.918054	0.334162
A0A0G2K012	UBX domain protein 6 OS=Rattus norvegicus GN=Ubxn6 PE=1 SV=1	1	1	0.905797	0.963768	0.874126	0.93007	0.91844	0.00508264
D4ACD4	RNA pseudouridylate synthase domain containing 2 (Predicted) OS=Rattus norvegicus GN=LOC100911166 PE=1 SV=1	1	1	0.819477	1.08314	1.02679	1.35714	1.07164	0.541759
A0A0G2JSM8	Cell division control protein 42 homolog OS=Rattus norvegicus GN=Cdc42 PE=1 SV=1	4	1	1.2	1.21449	0.990431	1.00239	1.10183	0.146002
D3ZMR1	Translocase of outer mitochondrial membrane 7 OS=Rattus norvegicus GN=Tomm7 PE=1 SV=1	1	1	1.0179	1.08184	0.908676	0.965753	0.993543	0.866956
B2RZB5	Charged multivesicular body protein 2A OS=Rattus norvegicus GN=Chmp2a PE=1 SV=1	1	1	1.11936	1	0.983683	0.878788	0.995459	0.929552
Q4G067	Mitochondrial ribosomal protein L44 OS=Rattus norvegicus GN=Mrpl44 PE=1 SV=1	1	1	1.1632	1.27003	1.07692	1.17582	1.1715	0.00487721
P28042	Single-stranded DNA-binding protein, mitochondrial OS=Rattus norvegicus GN=Ssbp1 PE=1 SV=2	1	1	0.845103	0.968109	0.909314	1.04167	0.941048	0.209083
P05540	T-cell surface glycoprotein CD4 OS=Rattus norvegicus GN=Cd4 PE=1 SV=1	1	1	1.08385	0.968944	1.36863	1.22353	1.16124	0.111711
D3ZSV7	Similar to THUMP domain containing 3 (Predicted), isoform CRA_a OS=Rattus norvegicus GN=Thumpd3 PE=1 SV=1	1	1	1.01592	1.03822	1.09622	1.12027	1.06766	0.0321599
Q8K4Y7	Soluble calcium-activated nucleotidase 1 OS=Rattus norvegicus GN=Cant1 PE=1 SV=1	3	3	1.25352	1.08169	1.28613	1.10983	1.18279	0.0115967
B0BN35	LOC687694 protein OS=Rattus norvegicus GN=Elp4 PE=2 SV=1	1	1	0.754923	0.956236	0.835351	1.05811	0.901156	0.188859
P81795	Eukaryotic translation initiation factor 2 subunit 3, X-linked OS=Rattus norvegicus GN=Eif2s3 PE=1 SV=2	5	1	0.94586	1.11783	1.04211	1.23158	1.08434	0.211985
D3ZZU8	Fructosamine 3 kinase OS=Rattus norvegicus GN=Fn3k PE=4 SV=2	2	2	1.0483	1.19318	0.924812	1.05263	1.05473	0.356838
A0A0G2K0X1	Pericentriolar material 1 OS=Rattus norvegicus GN=Pcm1 PE=1 SV=1	2	2	1.01596	1.35106	0.909524	1.20952	1.12152	0.263627
D3ZZZ5	Phosphopantothenoylcysteine decarboxylase OS=Rattus norvegicus GN=Ppcdc PE=1 SV=1	1	1	0.853503	0.968153	0.817073	0.926829	0.89139	0.0193747
P80067	Dipeptidyl peptidase 1 OS=Rattus norvegicus GN=Ctsc PE=1 SV=3	1	1	2.2766	1.03951	2.04087	0.93188	1.57222	0.146045
P57790	Kelch-like ECH-associated protein 1 OS=Rattus norvegicus GN=Keap1 PE=2 SV=1	1	1	1.02151	1.09946	1.01877	1.09651	1.05906	0.0392554
O54861	Sortilin OS=Rattus norvegicus GN=Sort1 PE=1 SV=3	2	2	0.987715	0.918919	0.978102	0.909976	0.948678	0.0421468
D3Z8P5	Similar to pyridoxal (pyridoxine, vitamin B6) kinase OS=Rattus norvegicus GN=RGD1566085 PE=1 SV=2	5	1	0.849246	0.859296	0.926027	0.936986	0.892889	0.00312593
D3ZAF5	Periostin OS=Rattus norvegicus GN=Postn PE=1 SV=1	1	1	0.983516	0.903846	0.92987	0.854545	0.917945	0.0223831
Q9Z0J5	Thioredoxin reductase 2, mitochondrial OS=Rattus norvegicus GN=Txnrd2 PE=1 SV=3	2	1	0.990712	1.14861	1.09589	1.27055	1.12644	0.0727221
P13852	Major prion protein OS=Rattus norvegicus GN=Prnp PE=1 SV=2	1	1	1.12066	1.01983	1.15897	1.0547	1.08854	0.0304882
G3V6F5	ElaC homolog 2 (E. coli) OS=Rattus norvegicus GN=Elac2 PE=1 SV=1	3	3	1.065	1.0425	1.00235	0.981176	1.02276	0.275553
B2RZ53	RAB36, member RAS oncogene family OS=Rattus norvegicus GN=Rab36 PE=2 SV=1	1	1	0.883289	1.13793	1.16028	1.49477	1.16907	0.226359
Q6AYB4	Heat shock 70 kDa protein 14 OS=Rattus norvegicus GN=Hspa14 PE=2 SV=1	2	2	0.983146	1.07022	0.948509	1.03252	1.0086	0.759298
A0A0G2K2D6	Tubulin polymerization-promoting protein OS=Rattus norvegicus GN=Tppp PE=1 SV=1	2	2	0.98452	1.08669	0.871233	0.961644	0.976021	0.607484
M0R4V3	Synaptosomal-associated protein OS=Rattus norvegicus GN=Snap23 PE=3 SV=2	2	1	1.1374	1.29517	1.03953	1.18372	1.16396	0.021397
Q5EBA1	ATP-dependent RNA helicase SUPV3L1, mitochondrial OS=Rattus norvegicus GN=Supv3l1 PE=2 SV=1	2	2	0.792541	1.12587	0.674603	0.958333	0.887838	0.297778
F1M400	Ankyrin repeat domain 28 OS=Rattus norvegicus GN=Ankrd28 PE=1 SV=2	2	2	0.982022	1.06292	0.865347	0.936634	0.961731	0.390992
A0A0G2JW23	NLR family, pyrin domain-containing 12 OS=Rattus norvegicus GN=Nlrp12 PE=4 SV=1	1	1	0.773639	1.06877	0.79646	1.10029	0.934791	0.480996
F1LMA4	G protein-coupled receptor kinase OS=Rattus norvegicus GN=Grk2 PE=1 SV=2	3	3	1.09779	1.17035	0.920635	0.981481	1.04256	0.477928
D3ZRG7	RNA-binding motif protein 26 OS=Rattus norvegicus GN=Rbm26 PE=1 SV=2	4	4	1.02278	1.13165	0.941725	1.04196	1.03453	0.40987
Q6PDW1	40S ribosomal protein S12 OS=Rattus norvegicus GN=Rps12 PE=1 SV=1	4	1	0.932394	1.20282	0.877984	1.13263	1.03646	0.656417
Q6AY90	Family with sequence similarity 192, member A OS=Rattus norvegicus GN=Fam192a PE=2 SV=1	2	2	1.04895	1.22611	0.993377	1.16115	1.1074	0.0879629
D3ZAQ6	Nucleolar protein 7 OS=Rattus norvegicus GN=Nol7 PE=1 SV=3	1	1	0.895792	0.97996	0.991131	1.08426	0.987785	0.762139
F1M3B3	Pleckstrin homology domain-interacting protein OS=Rattus norvegicus GN=Phip PE=1 SV=2	3	3	1.11351	1.10541	1.09284	1.08488	1.09916	4.5019e-06
A0A0G2K1M5	Similar to Ab2-095 OS=Rattus norvegicus GN=RGD1309079 PE=1 SV=1	2	2	0.994911	1.14758	0.987374	1.13889	1.06719	0.177344
Q9JIX3	Bis(5'-adenosyl)-triphosphatase OS=Rattus norvegicus GN=Fhit PE=1 SV=1	3	3	1.13043	1.1712	0.949772	0.984018	1.05886	0.319169
Q5XI64	Monoacylglycerol lipase ABHD6 OS=Rattus norvegicus GN=Abhd6 PE=1 SV=1	3	3	0.878788	0.787879	1.05899	0.949438	0.918773	0.205762
D4A7H9	CHMP family, member 7 (Predicted), isoform CRA_a OS=Rattus norvegicus GN=Chmp7 PE=1 SV=1	1	1	1.07229	1.14458	0.919897	0.981912	1.02967	0.570517
Q68FW7	Threonine--tRNA ligase, mitochondrial OS=Rattus norvegicus GN=Tars2 PE=2 SV=1	3	2	0.902148	0.937947	0.812903	0.845161	0.87454	0.0042286
F1LVA9	Dedicator of cytokinesis 5 OS=Rattus norvegicus GN=Dock5 PE=1 SV=2	2	2	0.892857	1.19107	0.844595	1.12669	1.0138	0.87684
D4ACQ9	GA repeat binding protein, alpha (Predicted) OS=Rattus norvegicus GN=Gabpa PE=1 SV=1	2	2	1.01064	1.17553	0.924574	1.07543	1.04654	0.413177
F1M790	Prostaglandin F2 receptor negative regulator OS=Rattus norvegicus GN=Ptgfrn PE=1 SV=3	2	2	0.875878	1.0281	0.857798	1.00688	0.942165	0.235396
F1LQU9	Small G protein-signaling modulator 3 OS=Rattus norvegicus GN=Sgsm3 PE=1 SV=1	5	5	0.956989	1.06183	1.01425	1.12536	1.0396	0.310057
Q4G005	TFIIH basal transcription factor complex helicase XPB subunit OS=Rattus norvegicus GN=Ercc3 PE=1 SV=1	2	2	0.843823	0.90676	0.822727	0.884091	0.86435	0.000382847
Q4V8Q2	Serine peptidase inhibitor, Kunitz type 1 OS=Rattus norvegicus GN=Spint1 PE=2 SV=1	1	1	1.01831	0.954233	0.923237	0.865145	0.94023	0.110204
A0A0G2JZD1	Serine/threonine-protein phosphatase 2A 56 kDa regulatory subunit OS=Rattus norvegicus GN=Ppp2r5c PE=1 SV=1	3	3	1.15158	1.1267	1.0409	1.0184	1.0844	0.0401377
A0A0G2K6I5	Transgelin OS=Rattus norvegicus GN=Tagln3 PE=1 SV=1	5	5	0.946387	0.946387	1.18713	1.18713	1.06676	0.373842
A0A0G2KAG1	SUN domain-containing ossification factor OS=Rattus norvegicus GN=Suco PE=1 SV=1	1	1	0.87747	1.0415	0.78169	0.927817	0.90712	0.136717
A0A096MJE6	Tenascin R, isoform CRA_b OS=Rattus norvegicus GN=Tnr PE=1 SV=1	3	3	0.964361	1.60587	0.982906	1.63675	1.29747	0.162982
B5DFG6	Car13 protein OS=Rattus norvegicus GN=Car13 PE=1 SV=1	1	1	0.812245	0.893878	0.902494	0.993197	0.900454	0.0360375
Q4V7D9	Sphingomyelin phosphodiesterase, acid-like 3B OS=Rattus norvegicus GN=Smpdl3b PE=2 SV=1	1	1	1.13175	0.978402	0.975791	0.843575	0.98238	0.774927
Q5M888	UPF0415 protein C7orf25 homolog OS=Rattus norvegicus PE=2 SV=1	1	1	1.01316	1.26316	0.892754	1.11304	1.07053	0.403145
Q62760	Mitochondrial import receptor subunit TOM20 homolog OS=Rattus norvegicus GN=Tomm20 PE=1 SV=2	1	1	0.929545	1.11136	1.00739	1.20443	1.06318	0.333099
F1LNT0	Dihydropyrimidinase-related protein 4 OS=Rattus norvegicus GN=Dpysl4 PE=4 SV=1	2	2	0.984375	1.11198	1.03279	1.16667	1.07395	0.11823
D3ZIT7	Integrator complex subunit 1-like OS=Rattus norvegicus GN=LOC103689975 PE=1 SV=3	1	1	0.960265	1.16777	0.919662	1.11839	1.04152	0.515255
D4A304	DIRAS family GTPase 1 OS=Rattus norvegicus GN=Diras1 PE=4 SV=1	1	1	1.03264	1.05935	0.857143	0.87931	0.95711	0.439395
D4A769	Sterile alpha motif domain-containing 4B OS=Rattus norvegicus GN=Samd4b PE=1 SV=1	1	1	0.841986	0.941309	0.785263	0.877895	0.861613	0.00548758
A0A0G2K948	Double PHD fingers 2 OS=Rattus norvegicus GN=Dpf2 PE=1 SV=1	2	2	1.20495	1.01351	1.19154	1.00223	1.10306	0.11048
D4A5J1	Kelch repeat and BTB domain-containing 11 OS=Rattus norvegicus GN=Kbtbd11 PE=1 SV=1	2	2	1.09685	0.731982	1.3796	0.92068	1.03228	0.822424
Q925D4	Transmembrane protein 176B OS=Rattus norvegicus GN=Tmem176b PE=1 SV=1	1	1	0.990291	1.00728	0.969121	0.985748	0.988111	0.180398
D3ZJ29	Uridine kinase-like 1 (Predicted) OS=Rattus norvegicus GN=Zfp512b PE=4 SV=1	2	2	1.02288	1.1373	0.957173	1.06424	1.0454	0.274304
Q8CHJ4	Transcription factor YY1 OS=Rattus norvegicus GN=Yy1 PE=1 SV=1	1	1	0.799114	0.70901	1.07984	0.958084	0.886512	0.21801
B2RZ64	Mbd3 protein (Fragment) OS=Rattus norvegicus GN=Mbd3 PE=2 SV=1	1	1	0.860384	0.862129	0.8203	0.821963	0.841194	9.4082e-06
D3ZUT9	Integrator complex subunit 3 OS=Rattus norvegicus GN=Ints3 PE=1 SV=1	2	2	0.979695	1.02538	0.875283	0.9161	0.949115	0.17716
B0BNB1	Commd1 protein OS=Rattus norvegicus GN=Commd1 PE=1 SV=1	1	1	0.831878	0.818777	0.879908	0.866051	0.849153	4.26086e-05
D3ZTY0	Cornichon family AMPA receptor auxiliary protein 4 OS=Rattus norvegicus GN=Cnih4 PE=1 SV=1	1	1	0.856851	0.822086	0.855102	0.820408	0.838612	3.67884e-06
Q5BKC6	HSPB1-associated protein 1 OS=Rattus norvegicus GN=Hspbap1 PE=1 SV=1	1	1	0.977629	0.914989	1	0.935927	0.957136	0.0684276
A0A0G2JVI4	Fucokinase OS=Rattus norvegicus GN=Fuk PE=1 SV=1	2	2	0.864444	1.06667	0.813808	1.00418	0.937276	0.328606
A0A0G2JXE5	Ankyrin repeat and LEM domain-containing protein 2 OS=Rattus norvegicus GN=Ankle2 PE=1 SV=1	1	1	0.997996	0.983968	0.968872	0.955253	0.976522	0.0442446
Q09325	Alpha-1,3-mannosyl-glycoprotein 2-beta-N-acetylglucosaminyltransferase OS=Rattus norvegicus GN=Mgat1 PE=2 SV=1	1	1	0.986425	1.26923	0.833652	1.07266	1.04049	0.671475
D4AAB5	Peptidase M20 domain-containing 2 OS=Rattus norvegicus GN=Pm20d2 PE=4 SV=1	2	2	1.02785	0.807595	1.11538	0.876374	0.9568	0.560231
D3ZWB1	LSM1 homolog, U6 small nuclear RNA associated (S. cerevisiae) (Predicted) OS=Rattus norvegicus GN=Lsm1 PE=4 SV=1	1	1	0.903803	0.794183	1.02278	0.898734	0.904876	0.0879309
Q6AYS8	Estradiol 17-beta-dehydrogenase 11 OS=Rattus norvegicus GN=Hsd17b11 PE=2 SV=1	3	3	0.925373	0.846482	1.11568	1.02057	0.977025	0.707299
F1LQ09	Atlastin GTPase 2 OS=Rattus norvegicus GN=Atl2 PE=1 SV=1	2	2	0.976879	1.22543	0.868895	1.08997	1.0403	0.61707
A0A0G2KA50	VPS39 HOPS complex subunit OS=Rattus norvegicus GN=Vps39 PE=1 SV=1	1	1	0.779048	1.04571	0.824597	1.10685	0.939053	0.478933
Q76EQ0	Serine racemase OS=Rattus norvegicus GN=Srr PE=1 SV=1	1	1	0.89016	0.844394	0.946472	0.89781	0.894709	0.00236147
B1H241	Resistance to inhibitors of cholinesterase 8 homolog A (C. elegans) OS=Rattus norvegicus GN=Ric8a PE=1 SV=1	3	3	0.771717	0.939394	0.828633	1.00868	0.887105	0.0790164
D3ZP60	Putative uncharacterized protein RGD1308559_predicted OS=Rattus norvegicus GN=Vwa5b1 PE=4 SV=1	1	1	1.04819	0.86747	1.05242	0.870968	0.959762	0.470769
D4A465	Late endosomal/lysosomal adaptor, MAPK and MTOR activator 2 OS=Rattus norvegicus GN=Lamtor2 PE=1 SV=1	2	2	0.994709	0.970899	1.22078	1.19156	1.09449	0.195897
A0A0G2JT23	Nuclear receptor-binding protein 2 OS=Rattus norvegicus GN=Nrbp2 PE=1 SV=1	1	1	1.05192	1.04966	0.924603	0.922619	0.987201	0.739309
A0A0G2JUG7	IQ motif and Sec7 domain 1 OS=Rattus norvegicus GN=Iqsec1 PE=1 SV=1	2	2	0.909871	0.798283	0.913793	0.801724	0.855918	0.00427938
Q5U2U0	ATP-dependent Clp protease ATP-binding subunit clpX-like, mitochondrial OS=Rattus norvegicus GN=Clpx PE=2 SV=1	6	6	0.866667	0.878788	0.859719	0.871743	0.869229	5.679e-08
Q6MG08	ATP-binding cassette sub-family F member 1 OS=Rattus norvegicus GN=Abcf1 PE=1 SV=1	3	3	0.938224	0.915058	0.995902	0.971311	0.955124	0.0454946
B1H249	Glucosamine-phosphate N-acetyltransferase 1 OS=Rattus norvegicus GN=Gnpnat1 PE=1 SV=1	2	2	0.899782	1.02179	1.0403	1.18136	1.03581	0.557473
Q32KJ6	N-acetylgalactosamine-6-sulfatase OS=Rattus norvegicus GN=Galns PE=1 SV=1	1	1	1.08943	1.19241	0.883516	0.967033	1.0331	0.643142
A0A0G2JSX1	Non-structural maintenance of chromosomes element 1 homolog OS=Rattus norvegicus GN=Nsmce1 PE=4 SV=1	1	1	0.764045	0.874532	0.851775	0.974948	0.866325	0.0215411
F1LMV6	Desmoplakin OS=Rattus norvegicus GN=Dsp PE=1 SV=1	8	8	0.870674	1.25683	0.924565	1.33462	1.09667	0.438541
Q6AXY7	Pre-mRNA-splicing factor 38B OS=Rattus norvegicus GN=Prpf38b PE=1 SV=1	1	1	1.04556	0.856492	1.16794	0.956743	1.00668	0.922861
Q5XI55	Peptide-N(4)-(N-acetyl-beta-glucosaminyl)asparagine amidase OS=Rattus norvegicus GN=Ngly1 PE=2 SV=2	2	2	0.947699	0.941423	0.934021	0.927835	0.937744	7.05976e-06
D3ZIU2	Proteasome assembly chaperone 3 OS=Rattus norvegicus GN=Psmg3 PE=1 SV=1	2	2	0.81592	0.759536	0.970414	0.903353	0.862306	0.025504
D3ZTF1	Solute carrier family 4 member 1 adaptor protein OS=Rattus norvegicus GN=Slc4a1ap PE=1 SV=3	3	3	1.28612	1.1898	0.991266	0.917031	1.09605	0.304732
D3ZNF4	Transducin (Beta)-like 1X-linked receptor 1 (Predicted) OS=Rattus norvegicus GN=Tbl1xr1 PE=1 SV=1	2	1	0.942974	1.08758	0.91502	1.05534	1.00023	0.995877
Q566D2	RCG30218, isoform CRA_b OS=Rattus norvegicus GN=Tigar PE=2 SV=1	1	1	0.928832	1.03102	0.908929	1.00893	0.969428	0.344624
Q2HWF0-2	Isoform 2 of Formin-binding protein 1-like OS=Rattus norvegicus GN=Fnbp1l	1	1	0.936634	0.936634	1.11033	1.11033	1.02348	0.6561
B1WC45	Vacuolar protein sorting 72 (Yeast) (Predicted) OS=Rattus norvegicus GN=Vps72 PE=2 SV=1	1	1	0.822695	0.879433	0.946939	1.01224	0.915328	0.0849847
G3V8Q1	Coatomer subunit epsilon OS=Rattus norvegicus GN=Cope PE=1 SV=3	2	2	0.888489	0.868705	0.871252	0.851852	0.870075	2.3651e-06
A0A0G2KAX1	EEF1A lysine methyltransferase 1 OS=Rattus norvegicus GN=Eef1akmt1 PE=3 SV=1	1	1	0.881453	1.21606	0.752039	1.03752	0.971768	0.787565
Q5BJT7	Coiled-coil domain-containing protein 93 OS=Rattus norvegicus GN=Ccdc93 PE=1 SV=1	3	3	0.937349	0.99759	0.894253	0.951724	0.945229	0.042259
A0A0G2K9B4	Mitochondrial ribosomal protein L15 OS=Rattus norvegicus GN=Mrpl15 PE=1 SV=1	1	1	0.920335	1.06289	0.83619	0.965714	0.946283	0.298775
Q499T3	Sirpa protein OS=Rattus norvegicus GN=Sirpa PE=1 SV=1	2	2	1.10706	0.990888	1.06114	0.949782	1.02722	0.468375
Q6AYA6	Uncharacterized protein C17orf62 homolog OS=Rattus norvegicus PE=1 SV=1	1	1	0.970238	1.12897	0.912313	1.06157	1.01827	0.716638
Q9EQL9	Sharpin OS=Rattus norvegicus GN=Sharpin PE=1 SV=1	1	1	1.13347	0.891949	1.08961	0.857434	0.993118	0.924143
Q5XI79	Protein arginine methyltransferase NDUFAF7, mitochondrial OS=Rattus norvegicus GN=Ndufaf7 PE=2 SV=1	1	1	0.938735	1.04348	1.08945	1.21101	1.07067	0.256956
D3ZFT1	Replication factor C subunit 1 OS=Rattus norvegicus GN=Rfc1 PE=1 SV=2	2	2	1.06772	1.26637	0.995789	1.18105	1.12773	0.0769952
G3V8D6	Tripartite motif protein 3, isoform CRA_a OS=Rattus norvegicus GN=Trim3 PE=1 SV=1	3	3	1.08503	0.855823	1.42476	1.12379	1.12235	0.335457
Q6AXY0	Glutathione S-transferase A6 OS=Rattus norvegicus GN=Gsta6 PE=1 SV=1	1	1	0.851024	0.986965	0.870476	1.00952	0.929497	0.129646
D4AAI7	Family with sequence similarity 219, member A OS=Rattus norvegicus GN=Fam219a PE=1 SV=2	1	1	1.12148	1.02169	1.05295	0.959267	1.03885	0.29328
Q5M9I6	Multiple myeloma tumor-associated protein 2 homolog OS=Rattus norvegicus GN=Mmtag2 PE=2 SV=2	1	1	1.07059	1.02745	1.04	0.998095	1.03403	0.0640111
G3V790	Transcription activator BRG1 OS=Rattus norvegicus GN=Smarca4 PE=1 SV=2	7	3	1.01313	1.02407	0.849541	0.858716	0.936364	0.229438
G3V8X1	RNA-binding protein 42 OS=Rattus norvegicus GN=Rbm42 PE=1 SV=1	2	2	0.904159	1.07233	0.94697	1.12311	1.01164	0.828703
Q56R17	Importin subunit alpha OS=Rattus norvegicus GN=Kpna4 PE=1 SV=1	5	2	0.890173	0.878613	0.836957	0.826087	0.857957	9.86768e-05
Q5RJY4	Dehydrogenase/reductase SDR family member 7B OS=Rattus norvegicus GN=Dhrs7b PE=1 SV=1	1	1	0.940035	0.918871	0.946714	0.9254	0.932755	4.44749e-05
A0A096MK61	Cartilage-associated protein-like 1 OS=Rattus norvegicus GN=Crtapl1 PE=1 SV=1	2	2	0.952118	0.935543	0.992322	0.975048	0.963758	0.0273558
D3ZCP9	Transcription initiation factor IIE subunit beta OS=Rattus norvegicus GN=Gtf2e2 PE=1 SV=1	1	1	0.964803	1.12008	0.803448	0.932759	0.955273	0.517533
D3ZFE9	Mitochondrial ribosomal protein L1-like OS=Rattus norvegicus GN=LOC100359687 PE=1 SV=3	1	1	0.948854	1.06349	0.890728	0.998344	0.975355	0.526849
D3ZX63	Similar to D3Mm3e (Predicted), isoform CRA_a OS=Rattus norvegicus GN=Wdr54 PE=4 SV=1	2	2	1.09375	0.915865	0.895669	0.75	0.913821	0.267043
A6Y857	Phosphoinositide phospholipase C OS=Rattus norvegicus PE=2 SV=1	2	2	0.998039	1.08235	0.910555	0.987478	0.994606	0.883073
Q6IFU7	Keratin, type I cytoskeletal 42 OS=Rattus norvegicus GN=Krt42 PE=3 SV=1	5	3	0.926415	0.933962	0.837884	0.84471	0.885743	0.0043849
Q7TQ77	Ac1288 OS=Rattus norvegicus GN=Hook3 PE=1 SV=1	3	3	1.20256	1.14499	1.16049	1.10494	1.15325	0.000271242
D3ZEM8	RCG34104, isoform CRA_a OS=Rattus norvegicus GN=Tsr1 PE=1 SV=1	1	1	0.836096	1.12891	0.829982	1.12066	0.978912	0.810698
F1LMT5	PEX5-related protein OS=Rattus norvegicus GN=Pex5l PE=1 SV=2	2	2	1.02414	1.06237	0.964015	1	1.01263	0.5636
P10687	1-phosphatidylinositol 4,5-bisphosphate phosphodiesterase beta-1 OS=Rattus norvegicus GN=Plcb1 PE=1 SV=1	1	1	1.06522	1.09289	1.02471	1.05133	1.05854	0.00620374
D4ABK1	Synaptogyrin 3 OS=Rattus norvegicus GN=Syngr3 PE=1 SV=1	1	1	1.32598	1.19118	0.92637	0.832192	1.06893	0.569282
B2GUX5	5'-nucleotidase OS=Rattus norvegicus GN=Nt5c3a PE=1 SV=1	3	3	0.911223	0.949749	1.07298	1.11834	1.01307	0.799373
Q5BJP2	Spliceosome-associated protein CWC15 homolog OS=Rattus norvegicus GN=Cwc15 PE=1 SV=1	2	2	1.05861	0.923623	0.670416	0.584927	0.809395	0.133465
D3ZL95	Ubiquitin-specific peptidase 40 OS=Rattus norvegicus GN=Usp40 PE=1 SV=1	1	1	0.820652	0.844203	0.90239	0.928287	0.873883	0.00233573
F1M7C0	Transmembrane protein 260 OS=Rattus norvegicus GN=Tmem260 PE=4 SV=2	1	1	0.954459	1.01328	0.967308	1.02692	0.990493	0.606896
A0A0G2JW38	Ribulose-phosphate 3-epimerase OS=Rattus norvegicus GN=Rpe PE=1 SV=1	3	2	1.06977	1.09725	0.92844	0.952294	1.01194	0.7857
Q58NB7	Retinoic acid receptor responder (Tazarotene induced) 1 OS=Rattus norvegicus GN=Rarres1 PE=2 SV=1	3	3	0.973025	0.944123	0.780526	0.757342	0.863754	0.0487645
D3ZJB8	Ariadne RBR E3 ubiquitin protein ligase 2 OS=Rattus norvegicus GN=Arih2 PE=1 SV=1	1	1	0.96875	1.03516	0.980237	1.04743	1.00789	0.700907
A1A5Q1	Poly [ADP-ribose] polymerase OS=Rattus norvegicus GN=Parp9 PE=1 SV=1	2	2	0.809148	0.943218	0.914439	1.06595	0.93319	0.252731
A0A0G2JWE3	Protein IWS1 homolog OS=Rattus norvegicus GN=Iws1 PE=1 SV=1	1	1	0.853261	0.90942	0.947686	1.01006	0.930107	0.0782115
D3ZWN1	Similar to zinc finger protein (Predicted) OS=Rattus norvegicus GN=Zpr1 PE=1 SV=1	2	2	1	0.930851	1.01805	0.947653	0.974139	0.259329
A0A0H2UHA3	Volume-regulated anion channel subunit LRRC8D OS=Rattus norvegicus GN=Lrrc8d PE=1 SV=1	1	1	0.759058	0.947464	0.799618	0.998092	0.876058	0.0741121
Q6AY69	Autophagy-related protein 101 OS=Rattus norvegicus GN=Atg101 PE=2 SV=1	1	1	1.08704	1.17602	1.05047	1.13645	1.11249	0.00647185
G3V6I1	Lethal(2) giant larvae protein homolog 1 OS=Rattus norvegicus GN=Llgl1 PE=1 SV=2	1	1	0.727023	0.757202	0.910653	0.948454	0.835833	0.0244874
A0A0G2K1G8	Solute carrier family 7, member 14 OS=Rattus norvegicus GN=Slc7a14 PE=1 SV=1	2	2	0.97094	1.11624	1.08397	1.24618	1.10433	0.114955
D3ZRM5	RAB23, member RAS oncogene family OS=Rattus norvegicus GN=Rab23 PE=4 SV=1	2	2	0.966135	1.16335	0.927342	1.11663	1.04336	0.476699
Q9QYW0	Protein AATF OS=Rattus norvegicus GN=Aatf PE=1 SV=1	1	1	0.853414	0.813253	0.896624	0.85443	0.85443	0.000140266
A0A0G2JZL6	Intraflagellar transport 122 OS=Rattus norvegicus GN=Ift122 PE=4 SV=1	2	2	0.951747	1.0782	0.88408	1.00155	0.978894	0.624524
B2GUW4	Exdl2 protein OS=Rattus norvegicus GN=Exd2 PE=2 SV=1	2	2	0.86129	0.966129	1.02495	1.14971	1.00052	0.993372
A0A0G2K5K1	Anoctamin OS=Rattus norvegicus GN=Ano8 PE=1 SV=1	1	1	1.01873	1.17603	0.966252	1.11545	1.06912	0.193187
O35049	Sphingomyelin phosphodiesterase 3 OS=Rattus norvegicus GN=Smpd3 PE=1 SV=2	3	3	1.04023	1.01916	0.901993	0.883721	0.961275	0.369363
P06536	Glucocorticoid receptor OS=Rattus norvegicus GN=Nr3c1 PE=1 SV=2	1	1	1.06061	1.1645	0.894161	0.981752	1.02526	0.67604
A1L1L9	RGD1563224 protein OS=Rattus norvegicus GN=Tmem65 PE=2 SV=1	1	1	0.916824	0.920605	0.85689	0.860424	0.888686	0.00068072
D4ADZ2	BICD cargo adaptor 1 OS=Rattus norvegicus GN=Bicd1 PE=4 SV=1	1	1	1.09369	1.11202	0.937173	0.95288	1.02394	0.62012
A0A0G2JV51	RNA cytidine acetyltransferase OS=Rattus norvegicus GN=Nat10 PE=1 SV=1	2	2	0.690972	0.956597	0.732965	1.01473	0.848817	0.108934
A0A0G2K8Q1	Apolipoprotein C-III OS=Rattus norvegicus GN=Apoc3 PE=1 SV=1	2	2	1.02947	1.14316	0.817726	0.908027	0.974596	0.732683
A0A0G2JV16	Dedicator of cytokinesis 11 OS=Rattus norvegicus GN=Dock11 PE=1 SV=1	1	1	0.913306	0.8125	0.941788	0.837838	0.876358	0.00675891
D3ZPP9	Caspase recruitment domain family, member 19 OS=Rattus norvegicus GN=Card19 PE=4 SV=1	2	2	0.971774	0.983871	0.88117	0.892139	0.932239	0.0432383
Q6AYA2	Vaccinia-related kinase 1 OS=Rattus norvegicus GN=Vrk1 PE=1 SV=1	1	1	0.909926	1.04596	0.823627	0.946755	0.931566	0.187716
D3ZH66	TAF5 RNA polymerase II, TATA box binding protein (TBP)-associated factor (Predicted) OS=Rattus norvegicus GN=Taf5 PE=4 SV=1	1	1	0.911985	1.07303	0.760938	0.895312	0.910317	0.210134
B5DFK7	Abhydrolase domain-containing 17C OS=Rattus norvegicus GN=Abhd17c PE=2 SV=1	1	1	0.797214	1.00464	0.929603	1.17148	0.975735	0.766477
A0A0G2K562	Disintegrin and metalloproteinase domain-containing protein 10 OS=Rattus norvegicus GN=Adam10 PE=1 SV=1	3	3	1.12591	0.919708	1.08627	0.887324	1.0048	0.938189
D3ZYU4	COX20 cytochrome C oxidase assembly factor OS=Rattus norvegicus GN=Cox20 PE=1 SV=1	1	1	0.929577	1.07042	0.826476	0.951699	0.944544	0.310289
Q6IUU3	Sulfhydryl oxidase 1 OS=Rattus norvegicus GN=Qsox1 PE=1 SV=1	4	4	0.669364	0.930636	0.827143	1.15	0.894286	0.334471
D3ZHX3	DIRAS family GTPase 2 OS=Rattus norvegicus GN=Diras2 PE=4 SV=1	1	1	0.970037	1.03371	1.01768	1.08448	1.02648	0.304652
O08560	Diacylglycerol kinase zeta OS=Rattus norvegicus GN=Dgkz PE=1 SV=1	1	1	1.10405	1.21002	0.902362	0.988976	1.05135	0.473163
A0A0G2JXD9	Dopey family member 2 OS=Rattus norvegicus GN=Dopey2 PE=1 SV=1	3	3	0.90625	0.955592	0.842508	0.888379	0.898182	0.00479217
B2RYJ2	Debranching RNA lariats 1 OS=Rattus norvegicus GN=Dbr1 PE=1 SV=1	1	1	0.928177	1.06446	0.969231	1.11154	1.01835	0.678762
D3ZXN8	Annexin A10 OS=Rattus norvegicus GN=Anxa10 PE=4 SV=2	4	3	1.73927	1.15103	1.80528	1.19472	1.47258	0.0346739
D4A264	Zinc-binding alcohol dehydrogenase, domain-containing 2 OS=Rattus norvegicus GN=Zadh2 PE=1 SV=2	2	2	1.20324	1.25	1.09852	1.14122	1.17324	0.00204575
Q91YB6	Complement inhibitory factor H OS=Rattus norvegicus GN=Cfh PE=2 SV=1	2	2	0.970395	0.861842	1.1028	0.979439	0.97862	0.679486
A0A0G2K916	Ankyrin repeat and KH domain-containing 1 OS=Rattus norvegicus GN=Ankhd1 PE=1 SV=1	4	1	0.903752	0.97553	0.914191	0.986799	0.945068	0.040308
P41413	Proprotein convertase subtilisin/kexin type 5 OS=Rattus norvegicus GN=Pcsk5 PE=2 SV=3	3	3	1.07353	1.1781	1.01703	1.1161	1.09619	0.0300506
D3ZT51	Exosome component 3 OS=Rattus norvegicus GN=Exosc3 PE=1 SV=2	1	1	1.14315	1.10373	1.08679	1.04931	1.09575	0.00266171
A0A0G2K5K7	Inositol polyphosphate-5-phosphatase K OS=Rattus norvegicus GN=Inpp5k PE=1 SV=1	1	1	1.03399	1.02326	0.998273	0.98791	1.01086	0.349394
Q6U6G5	Zinc finger CCCH domain-containing protein 15 OS=Rattus norvegicus GN=Zc3h15 PE=1 SV=1	1	1	0.884927	0.902755	1.00552	1.02578	0.954747	0.250652
Q08849	Syntaxin-3 OS=Rattus norvegicus GN=Stx3 PE=1 SV=1	1	1	0.88456	1.59596	0.502048	0.905815	0.972095	0.906469
A0A0G2K8N6	Ankyrin repeat and MYND domain-containing 2 OS=Rattus norvegicus GN=Ankmy2 PE=1 SV=1	3	3	0.864139	1.03002	0.842835	1.00462	0.935403	0.225087
Q9ESH6	Glutaredoxin-1 OS=Rattus norvegicus GN=Glrx PE=3 SV=3	1	1	0.870821	0.928571	0.836496	0.891971	0.881965	0.00086918
P34901	Syndecan-4 OS=Rattus norvegicus GN=Sdc4 PE=1 SV=1	1	1	0.921635	1.0971	1.07769	1.28287	1.09482	0.247155
B1WBX6	Small ArfGAP2 OS=Rattus norvegicus GN=Smap2 PE=1 SV=1	3	3	1.00198	1.12451	0.978764	1.09846	1.05093	0.203401
P06907	Myelin protein P0 OS=Rattus norvegicus GN=Mpz PE=1 SV=1	1	1	0.362138	0.209813	1.28275	0.743191	0.649473	0.192903
F1LV37	Trinucleotide repeat-containing 6B OS=Rattus norvegicus GN=Tnrc6b PE=1 SV=2	1	1	0.941901	0.996479	1.04902	1.1098	1.0243	0.523946
O35346	Focal adhesion kinase 1 OS=Rattus norvegicus GN=Ptk2 PE=1 SV=1	4	3	0.946774	0.9	1.00859	0.958763	0.953532	0.0823592
D4A0M2	Nucleoredoxin OS=Rattus norvegicus GN=Nxn PE=1 SV=2	1	1	0.978405	1.17442	0.956169	1.14773	1.06418	0.298447
A0A0G2JYJ1	Growth factor receptor-bound protein 10 OS=Rattus norvegicus GN=Grb10 PE=4 SV=1	1	1	0.903846	1.075	0.878505	1.04486	0.975553	0.638105
A0A0H2UHJ5	Zinc finger RNA-binding protein OS=Rattus norvegicus GN=Zfr PE=1 SV=1	6	6	0.956929	1.06929	0.95514	1.06729	1.01216	0.720381
G3V619	Activating signal cointegrator 1 complex subunit 1 OS=Rattus norvegicus GN=Ascc1 PE=1 SV=1	1	1	0.799043	0.971292	0.909256	1.10526	0.946213	0.431989
D3ZQB6	Cat eye syndrome chromosome region, candidate 5 OS=Rattus norvegicus GN=Hdhd5 PE=1 SV=1	2	2	0.877966	1.07119	0.817035	0.996845	0.940758	0.341095
B5DEX4	Vasp protein OS=Rattus norvegicus GN=Vasp PE=2 SV=1	1	1	0.952869	1.17008	0.846995	1.04007	1.0025	0.971978
Q6AYH6	ER membrane protein complex subunit 10 OS=Rattus norvegicus GN=Emc10 PE=1 SV=1	1	1	1.01518	0.840607	1.07	0.886	0.952947	0.415067
D4ACD3	Ubiquitin specific protease 25 (Predicted) OS=Rattus norvegicus GN=Usp25 PE=1 SV=1	1	1	1.053	1.26678	0.884273	1.0638	1.06696	0.425066
E9PTN1	Bromodomain-containing 8 OS=Rattus norvegicus GN=Brd8 PE=1 SV=1	1	1	1.09167	1.09167	1.00191	1.00191	1.04679	0.120969
Q8CF97	Deubiquitinating protein VCIP135 OS=Rattus norvegicus GN=Vcpip1 PE=1 SV=2	3	3	1.031	1.04731	0.946108	0.961078	0.996372	0.889852
F1M8Y4	DEP domain-containing MTOR-interacting protein OS=Rattus norvegicus GN=Deptor PE=1 SV=2	2	2	1.09857	0.888712	0.963738	0.779637	0.932664	0.353566
A0A0G2K2Q2	Glycine C-acetyltransferase OS=Rattus norvegicus GN=Gcat PE=1 SV=1	2	2	1.05725	1.18962	0.907834	1.02151	1.04405	0.476631
Q9JJP9	Ubiquilin-1 OS=Rattus norvegicus GN=Ubqln1 PE=1 SV=1	4	1	1.07641	0.873754	0.975904	0.792169	0.92956	0.297204
G3V6J2	O-acyltransferase OS=Rattus norvegicus GN=Soat1 PE=3 SV=1	1	1	1.11522	1.07826	0.936131	0.905109	1.00868	0.872398
Q6IMX7	Hsp70-binding protein 1 OS=Rattus norvegicus GN=Hspbp1 PE=1 SV=1	2	2	0.984177	0.982595	0.867503	0.866109	0.925096	0.0676798
B2RYL8	DEAD (Asp-Glu-Ala-Asp) box polypeptide 41 OS=Rattus norvegicus GN=Ddx41 PE=1 SV=1	3	3	0.927536	1.18841	0.654015	0.837956	0.901978	0.41181
Q4KLN7	ADP-ribosylation factor GTPase-activating protein 3 OS=Rattus norvegicus GN=Arfgap3 PE=1 SV=1	4	4	1.12598	1.21457	1.07925	1.16415	1.14599	0.00225271
M0R5H1	Enhancer trap locus 4 OS=Rattus norvegicus GN=Etl4 PE=1 SV=2	3	3	1.06341	0.965854	0.954745	0.867153	0.962792	0.389837
B0BMY7	Protein tyrosine kinase 9-like (A6-related protein) (Predicted), isoform CRA_b OS=Rattus norvegicus GN=Twf2 PE=1 SV=1	1	1	0.824089	0.898574	0.887372	0.967577	0.894403	0.0114631
B1H219	Dickkopf WNT-signaling pathway inhibitor 3 OS=Rattus norvegicus GN=Dkk3 PE=2 SV=1	1	1	1.03011	0.941363	0.980392	0.895928	0.961948	0.230711
Q0VGJ9	Receptor expression-enhancing protein OS=Rattus norvegicus GN=Reep2 PE=2 SV=1	2	2	1.03777	0.924466	1.06757	0.951014	0.995204	0.892937
Q5U1Y4	1,5-anhydro-D-fructose reductase OS=Rattus norvegicus GN=Akr1e2 PE=2 SV=1	2	2	1.02754	1.06568	0.822034	0.852542	0.941949	0.379787
P06757	Alcohol dehydrogenase 1 OS=Rattus norvegicus GN=Adh1 PE=1 SV=3	2	2	0.826162	1.06713	0.819113	1.05802	0.942605	0.439268
Q5PQN9	39S ribosomal protein L38, mitochondrial OS=Rattus norvegicus GN=Mrpl38 PE=2 SV=2	2	2	0.93265	0.947291	0.917867	0.932277	0.932521	2.97265e-05
D3ZMN2	Histone PARylation factor 1 OS=Rattus norvegicus GN=Hpf1 PE=4 SV=2	1	1	0.920068	0.935374	1.01501	1.03189	0.975587	0.417157
P68403-2	Isoform Beta-II of Protein kinase C beta type OS=Rattus norvegicus GN=Prkcb	5	1	0.953593	0.947605	0.876204	0.870702	0.912026	0.00763
A0A0G2K7X2	Tnf receptor-associated factor 3 OS=Rattus norvegicus GN=Traf3 PE=4 SV=1	2	2	1.02997	1.07886	0.846952	0.88716	0.960736	0.506617
A0A0G2JZD6	Regulated endocrine-specific protein 18 OS=Rattus norvegicus GN=Resp18 PE=4 SV=1	1	1	1.01408	0.879499	1.16547	1.01079	1.01746	0.775219
A0A0G2JV26	Protein phosphatase 4, regulatory subunit 4 OS=Rattus norvegicus GN=Ppp4r4 PE=1 SV=1	1	1	1.14365	0.957643	1.06154	0.888889	1.01293	0.825671
Q9WUF4	Vesicle-associated membrane protein 8 OS=Rattus norvegicus GN=Vamp8 PE=1 SV=1	3	3	0.791599	1.021	0.762053	0.982893	0.889387	0.143385
A0A0G2K0Q8	Sushi domain-containing 2 OS=Rattus norvegicus GN=Susd2 PE=1 SV=1	2	2	1.08824	1.21691	1.09024	1.21915	1.15363	0.00613574
D4A565	NADH dehydrogenase (Ubiquinone) 1 beta subcomplex, 5 (Predicted), isoform CRA_b OS=Rattus norvegicus GN=Ndufb5 PE=1 SV=1	1	1	0.890076	0.859542	0.921011	0.889415	0.890011	0.000122194
M0RAT6	Transmembrane p24 trafficking protein 8 OS=Rattus norvegicus GN=Tmed8 PE=1 SV=2	3	3	0.886435	1.11199	0.776243	0.973757	0.937106	0.40936
A0A0G2K5F1	LRP16 protein OS=Rattus norvegicus GN=Macrod1 PE=1 SV=1	1	1	1.10207	1.0925	1.01767	1.00884	1.05527	0.0641164
D3ZLT7	Similar to RIKEN cDNA 2510039O18 OS=Rattus norvegicus GN=RGD1305350 PE=1 SV=1	3	3	0.958258	1.23593	0.986916	1.2729	1.1135	0.215178
D4A7Q6	Putative uncharacterized protein RGD1564862_predicted OS=Rattus norvegicus GN=Zfp428 PE=4 SV=2	1	1	0.995138	0.922204	1.03367	0.957912	0.977231	0.379245
F1M8G8	Signal-induced proliferation-associated 1-like protein 2 OS=Rattus norvegicus GN=Sipa1l2 PE=1 SV=3	1	1	0.994671	1.01421	0.906149	0.923948	0.959745	0.177626
D3ZV40	Unkempt family zinc finger OS=Rattus norvegicus GN=Unk PE=1 SV=1	1	1	0.94822	0.891586	0.818436	0.769553	0.856949	0.0109849
D3ZQ82	Regulatory factor X, 1 (Influences HLA class II expression) (Predicted) OS=Rattus norvegicus GN=Rfx1 PE=1 SV=1	1	1	1.05797	0.903382	0.734078	0.626816	0.830562	0.124104
A0A0U1RRU0	SRSF protein kinase 1 OS=Rattus norvegicus GN=Srpk1 PE=1 SV=1	1	1	1.07401	1.01893	0.932735	0.884903	0.977645	0.617235
D3ZT56	Zinc finger protein 687 OS=Rattus norvegicus GN=Zfp687 PE=1 SV=1	2	2	1.06745	0.94941	0.989062	0.879687	0.971403	0.493101
Q811S9	Guanine nucleotide-binding protein-like 3 OS=Rattus norvegicus GN=Gnl3 PE=1 SV=1	1	1	1.10345	1.2433	0.837209	0.943314	1.03182	0.733639
G3V6K3	Exosome component 7 OS=Rattus norvegicus GN=Exosc7 PE=1 SV=1	1	1	0.979478	1.34888	0.914634	1.25958	1.12564	0.278816
A0A0G2JYU5	Ubiquitin-conjugating enzyme E2 B OS=Rattus norvegicus GN=LOC103694902 PE=1 SV=1	1	1	1.01475	1.17869	0.901019	1.04658	1.03526	0.559663
A0A140TAA8	Nucleoporin NDC1 OS=Rattus norvegicus GN=Ndc1 PE=1 SV=1	1	1	0.82293	0.849682	0.880109	0.908719	0.86536	0.000351025
Q6AYY8	Acetyl-coenzyme A transporter 1 OS=Rattus norvegicus GN=Slc33a1 PE=2 SV=1	1	1	1.02435	0.914783	1.15039	1.02734	1.02922	0.566131
Q01066	Calcium/calmodulin-dependent 3',5'-cyclic nucleotide phosphodiesterase 1B OS=Rattus norvegicus GN=Pde1b PE=1 SV=1	3	2	1.01017	1.24237	0.908537	1.11738	1.06961	0.368785
Q56AP7	Protein cereblon OS=Rattus norvegicus GN=Crbn PE=1 SV=1	1	1	0.735493	0.873144	0.828267	0.983283	0.855047	0.0304901
F1LWT1	Calcium-dependent secretion activator 2 OS=Rattus norvegicus GN=Cadps2 PE=4 SV=3	6	1	0.825963	0.965763	0.85905	1.00445	0.913807	0.0886453
Q4KLZ1	Transmembrane protein 186 OS=Rattus norvegicus GN=Tmem186 PE=2 SV=1	1	1	0.890183	0.925125	0.930435	0.966957	0.928175	0.00380317
A0A0G2JV09	Synembryn-B OS=Rattus norvegicus GN=Ric8b PE=1 SV=1	3	3	1.25051	1.24641	1.05181	1.04836	1.14927	0.040325
Q9Z2Q7	Syntaxin-8 OS=Rattus norvegicus GN=Stx8 PE=1 SV=1	2	2	1.01345	0.917647	1.02726	0.930153	0.972126	0.359543
G3V7H2	Multiple inositol polyphosphate phosphatase 1 OS=Rattus norvegicus GN=Minpp1 PE=3 SV=1	2	2	0.952542	0.891525	0.930464	0.870861	0.911348	0.00300291
D4A0T0	NADH:ubiquinone oxidoreductase subunit B10 OS=Rattus norvegicus GN=Ndufb10 PE=1 SV=1	2	2	0.908397	0.943511	0.847578	0.880342	0.894957	0.00211975
B0BNN3	Carbonic anhydrase 1 OS=Rattus norvegicus GN=Ca1 PE=1 SV=1	2	2	1.03993	1.09318	0.968992	1.0186	1.03018	0.285241
D3ZXB8	Ethanolamine kinase 1 OS=Rattus norvegicus GN=Etnk1 PE=1 SV=1	1	1	0.93039	0.860781	1.10262	1.02012	0.978477	0.697073
B0BMU7	Elongator complex protein 5 OS=Rattus norvegicus GN=Elp5 PE=1 SV=1	1	1	0.858369	1.03147	0.902256	1.08421	0.969077	0.581728
Q5XI26	Signal transducer and activator of transcription OS=Rattus norvegicus GN=Stat2 PE=1 SV=1	4	4	1.02326	0.943522	1.10197	1.0161	1.02121	0.536804
D3ZUY0	Retinol dehydrogenase 14 (all-trans/9-cis/11-cis) OS=Rattus norvegicus GN=Rdh14 PE=1 SV=1	2	2	1.0371	1.01129	1.04723	1.02117	1.0292	0.0108524
D3ZYQ0	Potassium channel tetramerization domain-containing 17 OS=Rattus norvegicus GN=Kctd17 PE=4 SV=1	1	1	0.953488	1.13953	0.945245	1.12968	1.04199	0.462724
F1MAR6	Proline dehydrogenase OS=Rattus norvegicus GN=Prodh1 PE=1 SV=2	2	2	0.959212	0.963432	0.799531	0.803048	0.881306	0.0424191
Q6AYA1	H/ACA ribonucleoprotein complex subunit 1 OS=Rattus norvegicus GN=Gar1 PE=2 SV=1	2	2	0.817232	0.772846	0.984277	0.930818	0.876293	0.0450338
D3ZXL5	Nuclear cap-binding subunit 3 OS=Rattus norvegicus GN=Ncbp3 PE=1 SV=1	2	2	0.964974	1.06305	0.854264	0.941085	0.955842	0.343303
Q7TPB7	MAL2A OS=Rattus norvegicus GN=Mal2 PE=2 SV=1	1	1	1.03912	1.08503	0.974482	1.01754	1.02904	0.253447
Q9JKS6	Protein piccolo OS=Rattus norvegicus GN=Pclo PE=1 SV=1	1	1	0.952888	0.905775	0.934426	0.888227	0.920329	0.00148902
A0A0G2JZV8	Synaptic functional regulator FMR1 OS=Rattus norvegicus GN=Fmr1 PE=1 SV=1	6	4	1.19125	1.14425	1.09212	1.04903	1.11916	0.00842474
Q6AYS3	Carboxypeptidase OS=Rattus norvegicus GN=Ctsa PE=1 SV=1	2	2	1.14626	0.974563	1.01549	0.86338	0.999925	0.999017
A0A0G2K0T6	Gamma-synuclein OS=Rattus norvegicus GN=Sncg PE=1 SV=1	3	3	0.916019	1.06376	0.983306	1.1419	1.02625	0.611247
Q8CIR5	MNAT1, CDK-activating kinase assembly factor OS=Rattus norvegicus GN=Mnat1 PE=1 SV=1	1	1	0.900149	1.02534	0.95873	1.09206	0.99407	0.891001
Q9WTQ2	Podocalyxin OS=Rattus norvegicus GN=Podxl PE=1 SV=2	1	1	1.12191	0.853395	1.17258	0.891935	1.00996	0.905402
Q62997	GDNF family receptor alpha-1 OS=Rattus norvegicus GN=Gfra1 PE=1 SV=1	1	1	1.01454	0.974152	0.938714	0.901345	0.957188	0.127482
D3ZUP8	LMBR1 domain-containing 2 OS=Rattus norvegicus GN=Lmbrd2 PE=1 SV=1	1	1	1.04159	0.992767	0.90566	0.863208	0.950806	0.270469
O55007	Ral GTPase-activating protein subunit alpha-1 OS=Rattus norvegicus GN=Ralgapa1 PE=1 SV=2	1	1	0.958146	1.17339	0.862719	1.05653	1.0127	0.855079
A0A0G2KAP1	Endoplasmic reticulum oxidoreductase 1 beta OS=Rattus norvegicus GN=Ero1b PE=1 SV=1	3	2	0.832362	0.966472	0.937603	1.08867	0.956277	0.438536
Q7TP99	Ab1-133 OS=Rattus norvegicus GN=Znfx1 PE=1 SV=1	2	2	0.807154	1.0451	0.721836	0.934631	0.877181	0.134493
D4A417	PDX1 C-terminal-inhibiting factor 1 OS=Rattus norvegicus GN=Pcif1 PE=1 SV=1	1	1	0.934156	0.886145	0.934156	0.886145	0.910151	0.000640216
D3ZKK3	Consortin, connexin sorting protein OS=Rattus norvegicus GN=Cnst PE=1 SV=3	1	1	0.854139	0.960578	0.884354	0.994558	0.923407	0.0572018
F1LNB3	A-kinase-anchoring protein 10 OS=Rattus norvegicus GN=Akap10 PE=1 SV=1	1	1	0.879499	1.08607	0.81686	1.00872	0.947788	0.424837
Q9Z1H9	Caveolae-associated protein 3 OS=Rattus norvegicus GN=Cavin3 PE=1 SV=1	1	1	0.930931	1.07508	0.80415	0.928664	0.934705	0.282991
G3V7R1	Nuclear pore complex protein Nup50 OS=Rattus norvegicus GN=Nup50 PE=1 SV=1	2	2	0.88057	1.16756	0.874336	1.15929	1.02044	0.812768
F1MAK9	Sphingomyelin phosphodiesterase 4 OS=Rattus norvegicus GN=Smpd4 PE=4 SV=3	2	2	0.6759	0.770083	1.04125	1.18634	0.918395	0.51579
A0A0G2JU07	Ubiquitin-conjugating enzyme E2 variant 2 OS=Rattus norvegicus GN=Ube2v2 PE=1 SV=1	4	1	1.20069	1.09689	1.18027	1.07823	1.13902	0.0037046
D3ZZW1	Dedicator of cyto-kinesis 1 OS=Rattus norvegicus GN=Dock1 PE=1 SV=1	2	2	0.863248	0.930199	0.935185	1.00772	0.934087	0.0669914
Q9WVR7	Protein phosphatase 1F OS=Rattus norvegicus GN=Ppm1f PE=2 SV=1	2	2	1.06616	1.22306	1.04059	1.19373	1.13089	0.028065
F1M155	Supervillin OS=Rattus norvegicus GN=Svil PE=1 SV=3	1	1	1	1.18785	0.906511	1.07679	1.04279	0.499672
A0JN29	Limb and neural patterns OS=Rattus norvegicus GN=Lnpk PE=1 SV=1	1	1	0.975989	0.805085	1.04381	0.861027	0.921477	0.196943
D3ZLT1	NADH dehydrogenase (Ubiquinone) 1 beta subcomplex, 7 (Predicted) OS=Rattus norvegicus GN=Ndufb7 PE=1 SV=1	2	2	1.05177	1.04905	1.02252	1.01987	1.0358	0.00551921
D3ZD24	Spectrin repeat-containing, nuclear envelope family member 3 OS=Rattus norvegicus GN=Syne3 PE=4 SV=3	3	3	1.15132	0.963816	1.05263	0.881203	1.01224	0.840061
F1LMA7	C-type mannose receptor 2 OS=Rattus norvegicus GN=Mrc2 PE=1 SV=2	1	1	1.05592	1.17928	0.901685	1.00702	1.03598	0.555194
A0A0G2K1P1	Myotubularin-related protein 7 OS=Rattus norvegicus GN=Mtmr7 PE=1 SV=1	2	2	0.867508	1.07098	0.846154	1.04462	0.957314	0.49255
D4A030	Upstream-binding protein 1 OS=Rattus norvegicus GN=Ubp1 PE=1 SV=1	1	1	1.08998	1.14315	0.835423	0.876176	0.986182	0.86262
F1LZB7	FERM domain-containing 4B OS=Rattus norvegicus GN=Frmd4b PE=1 SV=2	1	1	0.841352	1.04161	0.84026	1.04026	0.940871	0.345571
Q64232	Very-long-chain enoyl-CoA reductase OS=Rattus norvegicus GN=Tecr PE=1 SV=1	2	2	0.886154	1.07077	1.05882	1.27941	1.07379	0.39456
Q8R424	STAM-binding protein OS=Rattus norvegicus GN=Stambp PE=2 SV=1	2	2	0.937294	1.06766	0.907348	1.03355	0.986461	0.734971
D4ABB8	Probable phospholipid-transporting ATPase IIB OS=Rattus norvegicus GN=Atp9b PE=3 SV=1	4	2	0.964506	1.11883	0.99681	1.1563	1.05911	0.249866
P18614	Integrin alpha-1 OS=Rattus norvegicus GN=Itga1 PE=1 SV=1	2	2	0.836108	0.847631	0.85248	0.86423	0.850112	2.27142e-07
F1LRY5	RCG45398 OS=Rattus norvegicus GN=Sardh PE=1 SV=2	2	2	0.829653	0.968454	0.840256	0.980831	0.904798	0.0568331
A0A0G2K0B0	Protein CDV3 homolog OS=Rattus norvegicus GN=Cdv3 PE=1 SV=1	3	3	0.973568	0.825257	0.893531	0.757412	0.862442	0.0249346
Q6AXT8	Splicing factor 3A subunit 2 OS=Rattus norvegicus GN=Sf3a2 PE=2 SV=1	1	1	1.12903	0.782258	1.22592	0.849387	0.996649	0.976064
Q3SWT7	Nuclear receptor binding protein OS=Rattus norvegicus GN=Nrbp1 PE=1 SV=1	1	1	0.940819	0.913505	1.00324	0.97411	0.957918	0.0747058
D4A9Z2	DNA topoisomerase OS=Rattus norvegicus GN=Top3b PE=1 SV=1	1	1	0.891856	0.94259	0.935574	0.988796	0.939704	0.0228411
D4AE17	Mitogen-activated protein kinase kinase kinase 20 OS=Rattus norvegicus GN=Map3k20 PE=1 SV=1	1	1	1.0255	1.04533	0.909548	0.927136	0.976876	0.524444
Q6AXR1	TBC1 domain family, member 20 OS=Rattus norvegicus GN=Tbc1d20 PE=2 SV=1	1	1	0.929521	0.922872	0.995726	0.988604	0.959181	0.0770102
D4ADD7	Glutaredoxin 5 OS=Rattus norvegicus GN=Glrx5 PE=1 SV=1	1	1	0.838673	0.954233	0.867456	0.986982	0.911836	0.0457019
M0RBS9	Sorting nexin family member 27, isoform CRA_a OS=Rattus norvegicus GN=Snx27 PE=1 SV=1	3	3	0.995413	1.19572	0.890561	1.06977	1.03786	0.576759
G3V648	1-acylglycerol-3-phosphate O-acyltransferase 3 OS=Rattus norvegicus GN=Agpat3 PE=1 SV=1	1	1	0.803279	0.834699	0.847262	0.880403	0.841411	5.98946e-05
P23711	Heme oxygenase 2 OS=Rattus norvegicus GN=Hmox2 PE=1 SV=1	1	1	1.03905	0.916808	1.02685	0.90604	0.972186	0.459964
Q498S7	N-myc (And STAT) interactor OS=Rattus norvegicus GN=Nmi PE=2 SV=1	1	1	0.966278	1.05966	0.834267	0.914894	0.943775	0.278785
M0R3S1	Mitochondrial ribosomal protein S21-like OS=Rattus norvegicus GN=Mrps21l PE=4 SV=1	1	1	0.857988	0.933432	0.938511	1.02104	0.937742	0.110856
B0BNE1	Mediator of RNA polymerase II transcription subunit 6 OS=Rattus norvegicus GN=Med6 PE=2 SV=1	1	1	0.842266	1.17458	0.808824	1.12794	0.988403	0.906581
B1WBY7	ER lipid raft-associated 1 OS=Rattus norvegicus GN=Erlin1 PE=1 SV=1	4	1	1.11501	1.0014	0.965978	0.867558	0.987486	0.814607
F1LVV4	Regulator of chromosome condensation 2 OS=Rattus norvegicus GN=Rcc2 PE=1 SV=1	4	4	0.952639	0.845737	1.07645	0.955657	0.957622	0.403303
Q6AY19	Atypical kinase COQ8B, mitochondrial OS=Rattus norvegicus GN=Coq8b PE=1 SV=1	2	2	0.925099	1.0841	0.906049	1.06178	0.994256	0.904332
Q8K3F0	Amino acid transporter OS=Rattus norvegicus PE=2 SV=1	1	1	0.905109	1.08029	0.923994	1.10283	1.00306	0.954553
Q9R0W1	Pituitary homeobox 2 OS=Rattus norvegicus GN=Pitx2 PE=2 SV=1	1	1	0.842258	0.94356	0.868657	0.973134	0.906902	0.0232712
A0A0G2KAD4	Protein LBH OS=Rattus norvegicus GN=Lbh PE=1 SV=1	1	1	0.95288	0.959424	0.940568	0.947028	0.949975	1.66887e-05
O70511	Ankyrin-3 OS=Rattus norvegicus GN=Ank3 PE=1 SV=3	5	3	1.00713	1.06562	0.878109	0.929104	0.969992	0.496547
D4A315	Uncharacterized protein OS=Rattus norvegicus PE=3 SV=2	3	3	0.822686	0.938722	0.89886	1.02564	0.921477	0.11244
D3ZXB1	Mitogen-activated protein kinase kinase kinase kinase OS=Rattus norvegicus GN=Map4k2 PE=1 SV=1	1	1	1.25078	1.11755	1.05976	0.946879	1.09374	0.188605
D3ZYJ5	GRAM domain-containing 1B OS=Rattus norvegicus GN=Gramd1b PE=1 SV=1	1	1	1.12941	0.964706	1.0566	0.902516	1.01331	0.79898
A0A0A0MXV3	Cell growth regulator with EF hand domain 1, isoform CRA_b OS=Rattus norvegicus GN=Cgref1 PE=1 SV=1	1	1	1.00666	1.07488	0.99835	1.06601	1.03647	0.114587
D3ZXL1	Ariadne RBR E3 ubiquitin protein ligase 1 OS=Rattus norvegicus GN=Arih1 PE=1 SV=1	1	1	1.04703	1.0816	1.10997	1.14663	1.09631	0.00386992
Q63362	NADH dehydrogenase [ubiquinone] 1 alpha subcomplex subunit 5 OS=Rattus norvegicus GN=Ndufa5 PE=1 SV=3	4	3	0.844852	0.919605	0.549038	0.597617	0.727778	0.024285
A0A0G2K0S1	Calcium-binding and coiled-coil domain-containing protein 1 OS=Rattus norvegicus GN=Calcoco1 PE=1 SV=1	1	1	1.06239	1.12479	0.976744	1.03411	1.04951	0.158794
F1LMY3	Receptor-type tyrosine-protein phosphatase zeta OS=Rattus norvegicus GN=Ptprz1 PE=1 SV=3	1	1	0.879195	0.958389	0.887534	0.96748	0.923149	0.0158898
Q8K3P4	RNA-binding protein Musashi homolog 1 OS=Rattus norvegicus GN=Msi1 PE=2 SV=1	1	1	0.908563	0.994194	1.033	1.13036	1.01653	0.731593
D3ZFQ1	Ataxin 7-like 3B OS=Rattus norvegicus GN=Atxn7l3b PE=1 SV=1	1	1	0.892857	0.934286	0.872905	0.913408	0.903364	0.00033359
D3ZUQ2	N(alpha)-acetyltransferase 10, NatA catalytic subunit OS=Rattus norvegicus GN=Naa10 PE=1 SV=1	2	2	0.977578	0.988042	0.970326	0.980712	0.979165	0.00129083
D3ZPF2	Malonyl-CoA-acyl carrier protein transacylase OS=Rattus norvegicus GN=Mcat PE=1 SV=1	3	3	0.974565	1.01339	1.02247	1.0632	1.01841	0.350635
D3ZDD7	Spermatid perinuclear RNA binding protein, isoform CRA_a OS=Rattus norvegicus GN=Strbp PE=1 SV=1	7	3	0.849689	0.918012	0.938272	1.01372	0.929923	0.0831672
B0K015	COMM domain containing 8 (Predicted), isoform CRA_a OS=Rattus norvegicus GN=Commd8 PE=1 SV=1	1	1	0.948138	1.13165	0.833918	0.995322	0.977257	0.724716
A0A0U1RRU5	RCG59826 OS=Rattus norvegicus GN=Tab1 PE=1 SV=1	3	3	0.986092	1.06259	0.903185	0.973248	0.981278	0.587268
Q5U3Y2	RCG24403, isoform CRA_a OS=Rattus norvegicus GN=Smarcd3 PE=2 SV=1	1	1	0.94898	0.979592	0.962484	0.993532	0.971147	0.0252241
G3V6Y6	Alpha-1,4 glucan phosphorylase OS=Rattus norvegicus GN=Pygb PE=1 SV=2	18	1	0.867247	0.817193	0.979115	0.922604	0.89654	0.0252559
G3V7B0	Nucleolar protein 9 OS=Rattus norvegicus GN=Nol9 PE=4 SV=1	2	2	0.840476	0.997619	0.990182	1.17532	1.0009	0.98996
D4AC12	Ankyrin repeat and SAM domain containing 1 (Predicted) OS=Rattus norvegicus GN=Anks1a PE=1 SV=1	1	1	0.888031	0.996139	0.955679	1.07202	0.977968	0.587668
F1LP81	Epithelial-splicing regulatory protein 1 OS=Rattus norvegicus GN=Esrp1 PE=4 SV=3	3	3	0.911548	0.824324	1.0027	0.906757	0.911333	0.0509667
B1H227	LOC682908 protein OS=Rattus norvegicus GN=Rcc1 PE=1 SV=1	2	2	0.843862	0.969011	0.903061	1.03699	0.938231	0.188825
P21913	Succinate dehydrogenase [ubiquinone] iron-sulfur subunit, mitochondrial OS=Rattus norvegicus GN=Sdhb PE=2 SV=2	1	1	0.869507	0.808256	0.987897	0.918306	0.895991	0.0339222
D3ZWA1	Family with sequence similarity 63, member B OS=Rattus norvegicus GN=Mindy2 PE=1 SV=2	1	1	0.936925	1.07359	0.935696	1.07218	1.0046	0.910993
Q66HA5	Coiled-coil and C2 domain-containing protein 1A OS=Rattus norvegicus GN=Cc2d1a PE=1 SV=2	3	3	1.16063	1.20945	0.952196	0.992248	1.07863	0.25695
Q5EB90	Polymerase (RNA) II (DNA directed) polypeptide C, 33kDa OS=Rattus norvegicus GN=Polr2c PE=1 SV=1	3	3	0.956204	0.974453	0.915017	0.93248	0.944539	0.00540664
D3ZBB8	Cytoplasmic dynein 2 heavy chain 1 OS=Rattus norvegicus GN=Dync2h1 PE=4 SV=3	4	4	0.867299	0.959716	0.961892	1.06439	0.963324	0.397422
M0RB91	Queuine tRNA-ribosyltransferase accessory subunit 2 OS=Rattus norvegicus GN=Qtrt2 PE=1 SV=1	2	2	0.863868	0.924936	0.898148	0.96164	0.912148	0.0054109
Q3ZAU5	DDHD domain-containing 1 OS=Rattus norvegicus GN=Ddhd1 PE=1 SV=1	1	1	0.924623	1.01633	0.967148	1.06307	0.992795	0.818172
A0A0G2JWK7	Transgelin OS=Rattus norvegicus GN=Tagln PE=1 SV=1	2	2	0.987076	0.964459	0.91194	0.891045	0.93863	0.0334397
Q5BJS6	Transmembrane protein 50B OS=Rattus norvegicus GN=Tmem50b PE=2 SV=1	1	1	0.856106	0.91052	0.850962	0.905048	0.880659	0.00027327
O89000	Dihydropyrimidine dehydrogenase [NADP(+)] OS=Rattus norvegicus GN=Dpyd PE=2 SV=1	1	1	1.02279	1.03083	1.05387	1.06215	1.04241	0.00387074
D3ZV15	Cbl proto-oncogene OS=Rattus norvegicus GN=Cbl PE=1 SV=1	2	2	0.911028	1.02381	0.92142	1.03549	0.972936	0.442164
Q5PQN1	Probable E3 ubiquitin-protein ligase HERC4 OS=Rattus norvegicus GN=Herc4 PE=2 SV=1	3	3	0.958631	0.968616	0.957265	0.967236	0.962937	1.4309e-05
F1LV01	WD repeat domain 19 OS=Rattus norvegicus GN=Wdr19 PE=4 SV=2	2	2	1.05572	1.07229	0.878446	0.892231	0.974672	0.642006
D3ZW55	Inosine triphosphate pyrophosphatase OS=Rattus norvegicus GN=Itpa PE=3 SV=1	4	4	0.870927	0.988722	0.894466	1.01544	0.94239	0.153034
Q2YDU8	Protein spinster homolog 1 OS=Rattus norvegicus GN=Spns1 PE=2 SV=2	1	1	0.907895	0.851316	0.921228	0.863818	0.886064	0.000514064
P13601	Aldehyde dehydrogenase, cytosolic 1 OS=Rattus norvegicus GN=Aldh1a7 PE=1 SV=2	11	2	0.93771	0.900673	1.18008	1.13347	1.03799	0.605177
E9PTE5	Zinc finger MYM-type-containing 3 OS=Rattus norvegicus GN=Zmym3 PE=1 SV=1	3	3	0.934228	0.997315	0.939271	1.0027	0.968378	0.135138
Q5U2U9	CCR4-NOT transcription complex, subunit 8 OS=Rattus norvegicus GN=Cnot8 PE=2 SV=1	1	1	0.870647	0.874378	0.964187	0.96832	0.919383	0.0247486
Q5PPJ4	Deoxyhypusine hydroxylase OS=Rattus norvegicus GN=Dohh PE=2 SV=1	1	1	0.889474	0.936842	0.853535	0.89899	0.89471	0.000846328
Q6TUH9	Corticosteroid 11-beta-dehydrogenase isozyme 1 OS=Rattus norvegicus GN=Hsd11b1 PE=1 SV=1	1	1	0.945111	1.16981	0.966667	1.19649	1.06952	0.332594
A2RRU1	Glycogen [starch] synthase, muscle OS=Rattus norvegicus GN=Gys1 PE=1 SV=1	1	1	1.22063	1.07736	1.07848	0.951899	1.08209	0.185512
Q7TQ89	Ac1055 OS=Rattus norvegicus GN=Il6st PE=2 SV=1	1	1	0.919127	1.15276	0.866828	1.08717	1.00647	0.926997
O08836	Immunoglobulin-binding protein 1 OS=Rattus norvegicus GN=Igbp1 PE=2 SV=2	1	1	1.00823	1.21152	0.990762	1.19053	1.10026	0.137074
M0R637	tRNA (guanine-N(7)-)-methyltransferase OS=Rattus norvegicus GN=Mettl1 PE=1 SV=2	1	1	0.996548	0.902186	0.984091	0.890909	0.943434	0.0835287
Q99MG9	Kv channel-interacting protein 4 OS=Rattus norvegicus GN=Kcnip4 PE=1 SV=1	1	1	0.899379	1.03727	0.721834	0.832502	0.872746	0.101848
Q4FZV0	Beta-mannosidase OS=Rattus norvegicus GN=Manba PE=2 SV=1	2	2	1.0415	0.954604	1.05105	0.963351	1.00263	0.920815
B2RZ68	DDB1 and CUL4-associated factor 7 OS=Rattus norvegicus GN=Dcaf7 PE=1 SV=1	1	1	0.892958	0.930986	0.805591	0.839898	0.867358	0.00308952
Q9Z340	Partitioning defective 3 homolog OS=Rattus norvegicus GN=Pard3 PE=1 SV=1	1	1	1.16107	1.10067	0.998845	0.946882	1.05187	0.325316
F8WG88	Follistatin-related protein 1 OS=Rattus norvegicus GN=Fstl1 PE=4 SV=3	1	1	0.907407	0.801743	0.926585	0.818687	0.863606	0.00475711
A0A140UHW6	tRNA (guanine(26)-N(2))-dimethyltransferase OS=Rattus norvegicus GN=Trmt1 PE=1 SV=1	3	3	1.04027	0.950336	1.10085	1.00568	1.02428	0.470459
Q5FVG2	Band 4.1-like protein 5 OS=Rattus norvegicus GN=Epb41l5 PE=2 SV=2	1	1	0.925876	1.04313	0.896867	1.01044	0.969078	0.404506
Q2KN99	Cytospin-A OS=Rattus norvegicus GN=Specc1l PE=1 SV=1	2	2	0.9129	0.874311	0.946286	0.906286	0.909946	0.00088175
D3ZGX8	Bromodomain-containing 4 OS=Rattus norvegicus GN=Brd4 PE=1 SV=2	2	2	0.949468	1.00931	0.963563	1.02429	0.986658	0.484256
Q6P762	Alpha-mannosidase OS=Rattus norvegicus GN=Man2b1 PE=1 SV=1	3	3	0.914793	1.00237	1.09181	1.19633	1.05132	0.427695
O35077	Glycerol-3-phosphate dehydrogenase [NAD(+)], cytoplasmic OS=Rattus norvegicus GN=Gpd1 PE=1 SV=4	2	2	0.76769	0.911883	0.840643	0.998538	0.879689	0.0506279
Q5M9G1	Protein HEXIM1 OS=Rattus norvegicus GN=Hexim1 PE=1 SV=1	2	2	0.965728	0.903305	1.01414	0.948586	0.957939	0.115872
A0A0G2K6F1	T-complex 11-like 1 OS=Rattus norvegicus GN=Tcp11l1 PE=1 SV=1	2	2	1.22222	1.23829	1.03632	1.04994	1.13669	0.04513
Q02769	Squalene synthase OS=Rattus norvegicus GN=Fdft1 PE=2 SV=1	1	1	1.2288	1.1472	1	0.933594	1.0774	0.294346
A3KNA0	Aqr protein OS=Rattus norvegicus GN=Aqr PE=1 SV=1	1	1	0.800454	0.863946	0.840476	0.907143	0.853005	0.00058607
P30121	Metalloproteinase inhibitor 2 OS=Rattus norvegicus GN=Timp2 PE=1 SV=3	1	1	0.825855	0.940171	0.884439	1.00686	0.914332	0.0686791
D3ZN39	Ubiquitin specific protease 8 (Predicted) OS=Rattus norvegicus GN=Usp8 PE=1 SV=2	1	1	1.06294	1.24755	0.947631	1.11222	1.09258	0.186637
A0A0G2JW29	alpha-1,2-Mannosidase OS=Rattus norvegicus GN=Man1a1 PE=1 SV=1	1	1	0.945392	0.894198	0.884043	0.83617	0.889951	0.00267359
Q5BJT0	Arginine and glutamate-rich protein 1 OS=Rattus norvegicus GN=Arglu1 PE=1 SV=1	2	2	1.06766	1.01353	1.02202	0.970207	1.01835	0.393494
D3ZIE5	SWI/SNF-related, matrix-associated, actin-dependent regulator of chromatin, subfamily a, member 1 OS=Rattus norvegicus GN=Smarca1 PE=3 SV=3	4	2	1.0077	1.03594	1.07978	1.11004	1.05837	0.0424429
A0A0G2JUH4	Polynucleotide kinase 3'-phosphatase OS=Rattus norvegicus GN=Pnkp PE=1 SV=1	1	1	0.942242	0.9547	1.0387	1.05243	0.99702	0.919513
F1MA54	[Pyruvate dehydrogenase (acetyl-transferring)] kinase isozyme 1, mitochondrial OS=Rattus norvegicus GN=Pdk1 PE=1 SV=2	1	1	1.17386	1.45129	1.0473	1.29483	1.24182	0.0309313
Q6MGB5	Estradiol 17-beta-dehydrogenase 8 OS=Rattus norvegicus GN=Hsd17b8 PE=1 SV=1	2	2	0.906574	0.880046	1.03014	1	0.954191	0.251378
A0A0G2K6N8	Poly(A)-specific ribonuclease OS=Rattus norvegicus GN=Parn PE=1 SV=2	1	1	1.06761	1.21268	0.915459	1.03986	1.0589	0.371599
D4A6L1	TAP binding protein-like (Predicted) OS=Rattus norvegicus GN=Tapbpl PE=1 SV=1	2	2	1.01335	0.903561	1.00589	0.896907	0.954928	0.204209
Q27W01	RNA-binding protein 8A OS=Rattus norvegicus GN=Rbm8a PE=1 SV=1	1	1	1.09477	1.19608	1	1.09254	1.09585	0.0537794
P19527	Neurofilament light polypeptide OS=Rattus norvegicus GN=Nefl PE=1 SV=3	5	4	0.751096	0.730061	0.966178	0.939121	0.846614	0.0472066
O54880	Rab effector Noc2 OS=Rattus norvegicus GN=Rph3al PE=1 SV=1	3	3	1.04899	1.1005	1.12382	1.179	1.11308	0.00572791
Q641Y5	Ubiquitin-like modifier-activating enzyme ATG7 OS=Rattus norvegicus GN=Atg7 PE=2 SV=1	4	4	1.03306	1.2011	1	1.16267	1.09921	0.0885239
M0R715	Patatin-like phospholipase domain-containing 6 OS=Rattus norvegicus GN=Pnpla6 PE=1 SV=1	1	1	1.10052	1.13446	1.02805	1.05976	1.0807	0.0133226
A0A0G2K9Y9	Zinc finger protein 326 OS=Rattus norvegicus GN=Zfp326 PE=1 SV=1	2	2	1.00608	1.01825	0.960511	0.972125	0.989242	0.461327
A0A0G2JZA2	GrpE protein homolog OS=Rattus norvegicus GN=Grpel1 PE=1 SV=1	2	2	0.930446	0.97769	0.951678	1	0.964954	0.0601082
D4A0Y4	Oxidoreductase NAD-binding domain containing 1 (Predicted), isoform CRA_b OS=Rattus norvegicus GN=Oxnad1 PE=1 SV=1	1	1	0.933894	0.985577	0.890034	0.93929	0.937199	0.0182629
Q4G009	Malignant T-cell-amplified sequence 1 OS=Rattus norvegicus GN=Mcts1 PE=2 SV=1	1	1	0.792548	0.923464	0.905639	1.05524	0.919222	0.183999
B1H282	Collagen beta(1-O)galactosyltransferase 1 OS=Rattus norvegicus GN=Colgalt1 PE=1 SV=1	2	2	0.959397	1.03596	0.98102	1.05931	1.00892	0.71468
A0A0G2JXG7	Capping protein regulator and myosin 1 linker 1 OS=Rattus norvegicus GN=Carmil1 PE=1 SV=1	1	1	1.01799	1.0527	0.968215	1.00122	1.01003	0.588993
D3ZMY7	5'-nucleotidase, cytosolic II OS=Rattus norvegicus GN=Nt5c2 PE=1 SV=3	1	1	1.0581	1.04693	0.947	0.937	0.997257	0.934579
A0A0G2KAL9	Mitochondrial fission factor OS=Rattus norvegicus GN=Mff PE=1 SV=1	2	2	1.04408	1.09068	0.994005	1.03837	1.04178	0.0790002
Q5XI07	Lipoma-preferred partner homolog OS=Rattus norvegicus GN=Lpp PE=1 SV=1	1	1	1.2496	1.18124	1.02078	0.964935	1.10414	0.169624
P19356	Porphobilinogen deaminase OS=Rattus norvegicus GN=Hmbs PE=1 SV=2	4	4	0.860202	0.875315	0.95258	0.969317	0.914353	0.0201168
D4A7R3	Nucleoporin 205 OS=Rattus norvegicus GN=Nup205 PE=1 SV=1	8	8	1.06221	1.12559	1.04988	1.11253	1.08755	0.0032637
A0A1W2Q655	Zinc finger and BTB domain containing 20 (Predicted), isoform CRA_c OS=Rattus norvegicus GN=Zbtb20 PE=1 SV=1	1	1	0.987639	1.09147	0.918391	1.01494	1.00311	0.933549
D3ZTW7	ATP synthase mitochondrial F1 complex assembly factor 2 OS=Rattus norvegicus GN=Atpaf2 PE=1 SV=1	1	1	0.942895	0.903054	0.894207	0.856423	0.899145	0.00127941
A0A0G2K199	Leprecan 1, isoform CRA_c OS=Rattus norvegicus GN=P3h1 PE=1 SV=1	2	2	0.938042	1.00991	0.865143	0.931429	0.936132	0.0742583
Q3ZAV2	Nuclease-sensitive element-binding protein 1 OS=Rattus norvegicus GN=Ybx1 PE=1 SV=1	2	1	0.961672	0.910569	0.962791	0.911628	0.936665	0.00515017
Q9EQH5-2	Isoform 2 of C-terminal-binding protein 2 OS=Rattus norvegicus GN=Ctbp2	4	1	1.22067	0.97067	1.04048	0.827381	1.0148	0.862233
G3V8X8	Noggin OS=Rattus norvegicus GN=Nog PE=3 SV=1	1	1	0.944974	1.07937	1.01133	1.15515	1.0477	0.331039
B2GV05	RNA-binding protein 5 OS=Rattus norvegicus GN=Rbm5 PE=1 SV=1	4	3	1.00428	1.11412	0.950067	1.05398	1.03061	0.415413
D2XV59	GTP-binding protein 1 OS=Rattus norvegicus GN=Gtpbp1 PE=1 SV=1	4	4	1.01295	0.977979	0.930952	0.89881	0.955174	0.125615
Q4KLG9	AN1-type zinc finger protein 2B OS=Rattus norvegicus GN=Zfand2b PE=1 SV=1	2	2	0.93633	0.927591	0.930521	0.921836	0.929069	3.89563e-07
D4A4X6	ADAMTS-like 2 OS=Rattus norvegicus GN=Adamtsl2 PE=4 SV=1	1	1	0.893564	0.976485	0.85242	0.931523	0.913498	0.0171293
D4A3P1	Ubiquilin 4 OS=Rattus norvegicus GN=Ubqln4 PE=1 SV=1	3	1	1.0695	1.13385	0.94863	1.00571	1.03942	0.362432
Q5U2Q7	Eukaryotic peptide chain release factor subunit 1 OS=Rattus norvegicus GN=Etf1 PE=2 SV=3	5	5	0.891521	1.11596	0.928571	1.16234	1.0246	0.727041
Q4QQW0	Igh-6 protein (Fragment) OS=Rattus norvegicus GN=Igh-6 PE=2 SV=1	2	1	2.08833	1.14511	1.30187	0.713864	1.31229	0.318299
Q5U2X0	CDKN2A-interacting protein OS=Rattus norvegicus GN=Cdkn2aip PE=1 SV=1	1	1	0.891753	1.03814	0.979615	1.14043	1.01249	0.818887
D3ZPQ4	Putative uncharacterized protein RGD1560157_predicted OS=Rattus norvegicus GN=Zfp800 PE=1 SV=1	1	1	0.918951	1.15018	0.840785	1.05234	0.990565	0.895458
P53565	Homeobox protein cut-like 1 OS=Rattus norvegicus GN=Cux1 PE=1 SV=2	3	3	0.94716	1.09379	0.847518	0.978723	0.966798	0.537069
G3V7B5	Phosphoribosyl pyrophosphate synthase-associated protein 1 OS=Rattus norvegicus GN=Prpsap1 PE=1 SV=1	2	1	0.935301	0.940976	0.932127	0.937783	0.936547	4.44775e-08
D3ZAI0	U2 snRNP-associated SURP domain-containing OS=Rattus norvegicus GN=U2surp PE=1 SV=1	2	2	1.1505	1.14428	1.0255	1.01996	1.08506	0.0562098
D4A8H5	Protein phosphatase 4, regulatory subunit 2 OS=Rattus norvegicus GN=Ppp4r2 PE=1 SV=2	2	2	1.27508	1.15957	1.21594	1.1058	1.1891	0.00203236
D3ZLC3	Sperm specific antigen 2 (Predicted) OS=Rattus norvegicus GN=Ssfa2 PE=1 SV=1	1	1	1.1488	1.1261	1.09759	1.0759	1.1121	0.00041841
Q5XIG0	ADP-ribose pyrophosphatase, mitochondrial OS=Rattus norvegicus GN=Nudt9 PE=2 SV=1	2	2	0.685691	0.712159	0.952874	0.989655	0.835095	0.0823702
D3ZJH2	SURP and G patch domain-containing 2 OS=Rattus norvegicus GN=Sugp2 PE=1 SV=1	2	2	0.876377	0.977968	0.852381	0.95119	0.914479	0.0285842
A0A0G2K3I9	Dual-specificity phosphatase 3 OS=Rattus norvegicus GN=Dusp3 PE=1 SV=1	3	3	0.897914	1.06037	1.00615	1.18819	1.03816	0.55049
P35233	Tyrosine-protein phosphatase non-receptor type 2 OS=Rattus norvegicus GN=Ptpn2 PE=1 SV=2	1	1	0.937759	0.875519	0.962726	0.898829	0.918708	0.00588057
P20767	Ig lambda-2 chain C region OS=Rattus norvegicus PE=4 SV=1	2	2	0.909713	1.07114	0.787915	0.927725	0.924122	0.238764
Q920F5	Malonyl-CoA decarboxylase, mitochondrial OS=Rattus norvegicus GN=Mlycd PE=1 SV=1	1	1	1.0397	1.01861	0.989374	0.969303	1.00425	0.794029
Q62967	Diphosphomevalonate decarboxylase OS=Rattus norvegicus GN=Mvd PE=1 SV=1	2	2	0.970996	0.929382	0.942472	0.902081	0.936233	0.00431508
Q568Y6	DNA methyltransferase 1-associated protein 1 OS=Rattus norvegicus GN=Dmap1 PE=1 SV=1	1	1	1.02736	1.0995	0.953811	1.02079	1.02537	0.427014
B0BN65	Family with sequence similarity 49, member A OS=Rattus norvegicus GN=Fam49a PE=1 SV=1	1	1	0.963235	1.0098	1.01419	1.06323	1.01261	0.559682
Q5U2V8	ER membrane protein complex subunit 3 OS=Rattus norvegicus GN=Emc3 PE=2 SV=3	1	1	1.02038	1.00637	0.937939	0.925059	0.972437	0.293642
Q62718	Neurotrimin OS=Rattus norvegicus GN=Ntm PE=1 SV=1	2	2	1.21024	0.925311	1.03796	0.793594	0.991775	0.928814
Q7TN78	Acyl-coenzyme A synthetase ACSM4, mitochondrial OS=Rattus norvegicus GN=Acsm4 PE=2 SV=1	1	1	0.914647	1.0569	0.847656	0.979492	0.949674	0.303643
A0A0G2K4G0	Retinoic acid-induced 1 OS=Rattus norvegicus GN=Rai1 PE=1 SV=1	1	1	0.96966	1.01214	0.926914	0.967517	0.969057	0.125726
D3ZX08	Alanine--tRNA ligase, mitochondrial OS=Rattus norvegicus GN=Aars2 PE=3 SV=1	3	3	0.936526	0.994432	0.912148	0.968547	0.952913	0.0399924
D3ZAZ0	Eukaryotic translation initiation factor 3 subunit M OS=Rattus norvegicus GN=Eif3m PE=1 SV=1	1	1	0.858683	0.961677	0.950928	1.06499	0.959069	0.369525
Q63616	Vacuolar protein sorting-associated protein 33B OS=Rattus norvegicus GN=Vps33b PE=2 SV=1	4	4	0.983312	1.14763	0.890698	1.03953	1.01529	0.785516
D3ZM09	Seryl-tRNA synthetase 2 (Predicted) OS=Rattus norvegicus GN=Sars2 PE=1 SV=1	1	1	0.974148	0.92832	0.884739	0.843116	0.907581	0.0168648
A0A0G2K5L1	FAT atypical cadherin 1 OS=Rattus norvegicus GN=Fat1 PE=1 SV=1	1	1	1.02611	0.986945	1.05362	1.0134	1.02002	0.198612
D3ZYG0	Vav guanine nucleotide exchange factor 2 OS=Rattus norvegicus GN=Vav2 PE=1 SV=1	1	1	0.783544	1.01899	0.77375	1.00625	0.895633	0.173678
D3ZKC9	Similar to mKIAA1429 protein OS=Rattus norvegicus GN=Virma PE=1 SV=3	2	2	0.98665	1.08374	1.01245	1.11208	1.04873	0.149087
B5DFN4	Prefoldin 5 (Predicted), isoform CRA_a OS=Rattus norvegicus GN=Pfdn5 PE=1 SV=1	2	2	0.934884	0.994186	0.916762	0.974914	0.955186	0.0453672
A1A5R1	RNA binding protein fox-1 homolog 2 OS=Rattus norvegicus GN=Rbfox2 PE=2 SV=1	1	1	0.989703	1.02517	1.08805	1.12704	1.05749	0.111547
Q4V8E4	Cilia- and flagella-associated protein 36 OS=Rattus norvegicus GN=Cfap36 PE=1 SV=1	4	4	1.03488	1.07209	1.10973	1.14963	1.09158	0.00991129
G3V7V9	Leucine carboxyl methyltransferase 1 OS=Rattus norvegicus GN=Lcmt1 PE=1 SV=1	1	1	0.909845	0.958549	0.94206	0.992489	0.950736	0.0286692
D3ZSY8	TBC1 domain family, member 10b OS=Rattus norvegicus GN=Tbc1d10b PE=1 SV=1	2	2	1.02834	1.02479	1.10673	1.10292	1.0657	0.0271701
B0BNB4	MYST/Esa1-associated factor 6 OS=Rattus norvegicus GN=Meaf6 PE=1 SV=1	1	1	0.913237	0.89099	0.961358	0.937939	0.925881	0.00279859
D3ZF54	Anoctamin OS=Rattus norvegicus GN=Ano10 PE=1 SV=2	2	2	0.946869	0.895636	1.01733	0.962283	0.955529	0.126139
B5DFD8	SH3 domain-binding glutamic acid-rich-like protein OS=Rattus norvegicus GN=Sh3bgrl PE=1 SV=1	2	2	0.991954	2.15862	1.14305	2.48742	1.69526	0.109207
B2RZ66	Signal recognition particle 19 OS=Rattus norvegicus GN=Srp19 PE=1 SV=1	1	1	0.978643	1.19598	0.902665	1.10313	1.0451	0.514237
Q4QQU5	Protein YIPF6 OS=Rattus norvegicus GN=Yipf6 PE=1 SV=1	1	1	1.0073	0.8309	0.984542	0.812128	0.908718	0.121911
A0A0G2QC27	Nucleolar protein 6 OS=Rattus norvegicus GN=Nol6 PE=1 SV=1	1	1	1.0632	1.04833	1.01659	1.00237	1.03262	0.0587096
F1LRL4	Similar to TBC1 domain family, member 8; BUB2-like protein 1; vascular Rab-GAP/TBC-containing (Predicted), isoform CRA_a OS=Rattus norvegicus GN=Tbc1d9b PE=1 SV=2	3	3	1.01544	0.84344	1.03833	0.862458	0.939916	0.279733
A0A292G0W2	Gai-interacting protein OS=Rattus norvegicus GN=Phf24 PE=4 SV=1	1	1	0.881579	1.08603	0.801288	0.987121	0.939005	0.363538
Q8CG07	ATPase WRNIP1 OS=Rattus norvegicus GN=Wrnip1 PE=1 SV=1	2	2	1.00348	1.0511	0.912355	0.955649	0.980648	0.542282
F1LSG8	Syndetin OS=Rattus norvegicus GN=Vps50 PE=1 SV=1	1	1	1.03405	1.3269	0.916499	1.17606	1.11338	0.248756
G3V9N7	Protein kinase C and casein kinase substrate in neurons 3 OS=Rattus norvegicus GN=Pacsin3 PE=1 SV=3	1	1	0.913556	0.888998	0.924453	0.899602	0.906652	2.02882e-05
Q497A2	D-serine modulator-1 OS=Rattus norvegicus GN=Slc35b2 PE=1 SV=1	1	1	1.02362	1.14436	1.03448	1.1565	1.08974	0.0435046
D3ZM26	MDS1 and EVI1 complex locus OS=Rattus norvegicus GN=Mecom PE=1 SV=2	1	1	0.909639	1.08675	0.891381	1.06494	0.988175	0.824174
D3Z865	Mannose-P-dolichol utilization defect 1 OS=Rattus norvegicus GN=Mpdu1 PE=1 SV=1	1	1	0.971231	1.04028	0.86653	0.928131	0.951542	0.23322
G3V9M3	RCG28460 OS=Rattus norvegicus GN=Wdr47 PE=1 SV=1	1	1	1.12198	1.05934	1.12942	1.06637	1.09428	0.00208944
D3KR63	cAMPS OS=Rattus norvegicus GN=Rapgef4 PE=2 SV=1	2	2	0.980769	0.959135	0.93901	0.918297	0.949303	0.00913828
A0A0G2KA69	Protein SDE2 homolog OS=Rattus norvegicus GN=Sde2 PE=1 SV=1	1	1	0.955429	1.11429	0.889362	1.03723	0.999078	0.985555
A0A0G2K7P2	PHD finger protein 14 OS=Rattus norvegicus GN=Phf14 PE=1 SV=1	1	1	0.962222	0.988889	0.918346	0.943796	0.953313	0.0201505
F1LQI6	Zyg-11-related, cell cycle regulator OS=Rattus norvegicus GN=Zer1 PE=1 SV=1	1	1	0.890644	1.00243	0.956919	1.07702	0.981754	0.657866
D4A5D4	Microtubule crosslinking factor 1 OS=Rattus norvegicus GN=Mtcl1 PE=1 SV=3	2	1	1.06047	1.02093	1.05069	1.01152	1.0359	0.0219304
G3V927	Discs, large homolog-associated protein 4 (Drosophila) OS=Rattus norvegicus GN=Dlgap4 PE=1 SV=1	1	1	0.970819	1.06622	0.939197	1.03149	1.00193	0.948629
F1LP26	Shroom family member 3 OS=Rattus norvegicus GN=Shroom3 PE=1 SV=3	1	1	0.944056	0.89627	0.909091	0.863075	0.903123	0.00116406
Q6P752	Torsin-1A-interacting protein 2 OS=Rattus norvegicus GN=Tor1aip2 PE=2 SV=1	1	1	0.991607	0.920863	1.07823	1.0013	0.998	0.952488
Q7TQ75	Microtubule-associated protein 1 light chain 3 beta OS=Rattus norvegicus GN=Map1lc3b PE=2 SV=1	1	1	0.881733	1.05855	0.880702	1.05731	0.969573	0.572676
D4ADP9	Coatomer protein complex, subunit zeta 2 OS=Rattus norvegicus GN=Copz2 PE=1 SV=2	1	1	0.873134	0.900498	0.943548	0.973118	0.922575	0.0130781
D3ZDW3	TSC22 domain family, member 2 OS=Rattus norvegicus GN=Tsc22d2 PE=1 SV=1	1	1	1.05184	1.01037	0.953027	0.915449	0.982672	0.587052
Q5XI27	Accs protein (Fragment) OS=Rattus norvegicus GN=Accs PE=2 SV=1	1	1	1.12567	1.02941	1.02061	0.933333	1.02725	0.514162
A0A0A0MY07	Ubiquitin carboxyl-terminal hydrolase 15 OS=Rattus norvegicus GN=Usp15 PE=1 SV=1	3	3	0.892051	1.06968	0.9859	1.18221	1.03246	0.617733
M0RDH0	Glycine N-methyltransferase OS=Rattus norvegicus GN=LOC100911564 PE=3 SV=1	1	1	1.09524	1.1619	0.976645	1.03609	1.06747	0.140218
B1WC53	Ift52 protein OS=Rattus norvegicus GN=Ift52 PE=2 SV=1	1	1	0.677928	0.701201	1.11207	1.15025	0.910361	0.50934
D3ZT52	Polybromo 1 OS=Rattus norvegicus GN=Pbrm1 PE=1 SV=2	2	2	0.967306	1.0823	0.89375	1	0.985839	0.729517
F1M943	Armadillo repeat-containing 8 OS=Rattus norvegicus GN=Armc8 PE=1 SV=2	2	2	1.09845	1.1114	0.929825	0.940789	1.02011	0.696194
B1WBU9	Alpha-1,4 glucan phosphorylase OS=Rattus norvegicus GN=Pygm PE=2 SV=1	3	2	0.850834	1.06084	0.906904	1.13075	0.987334	0.852465
A0A140TAF7	Protein O-glucosyltransferase 1 OS=Rattus norvegicus GN=Poglut1 PE=1 SV=1	3	3	0.82563	0.991597	0.929078	1.11584	0.965536	0.590617
A0A0G2JZR1	Oxysterol-binding protein OS=Rattus norvegicus GN=Osbpl6 PE=1 SV=1	1	1	1.04781	1.12022	0.892899	0.954598	1.00388	0.940838
Q810U0	Coiled-coil domain-containing protein 50 OS=Rattus norvegicus GN=Ccdc50 PE=2 SV=1	1	1	0.911481	0.978089	1.09359	1.1735	1.03916	0.527973
Q5PQX0	UDP-glucuronic acid decarboxylase 1 OS=Rattus norvegicus GN=Uxs1 PE=1 SV=1	2	2	0.850886	0.983316	0.870864	1.0064	0.927868	0.115186
F1LMJ8	Calcium uptake protein 2, mitochondrial OS=Rattus norvegicus GN=Micu2 PE=1 SV=1	1	1	1.04335	1.01008	1.02071	0.988166	1.01558	0.223368
Q4KLN4	Nucleoporin GLE1 OS=Rattus norvegicus GN=Gle1 PE=2 SV=1	1	1	0.958427	1.01348	0.902646	0.954497	0.957263	0.108046
Q9JKL8	Activity-dependent neuroprotector homeobox protein OS=Rattus norvegicus GN=Adnp PE=1 SV=2	3	3	0.926007	1.08923	0.964853	1.13492	1.02875	0.583521
D4ADD8	Dynactin 6 (Predicted), isoform CRA_b OS=Rattus norvegicus GN=Dctn6 PE=1 SV=1	2	2	1.00455	1.10455	0.947481	1.0418	1.02459	0.483778
A0A0G2JXP1	Glycogenin-1 OS=Rattus norvegicus GN=Gyg1 PE=1 SV=1	3	3	0.932079	0.877743	1.04695	0.985915	0.960672	0.319709
Q8VHJ9	Nesprin-1 OS=Rattus norvegicus GN=Syne1 PE=2 SV=1	7	7	1.01251	1.13083	0.953912	1.06538	1.04066	0.322298
A0A140TAD1	ADP-sugar pyrophosphatase OS=Rattus norvegicus GN=Nudt5 PE=1 SV=1	2	2	1.20757	1.14286	1.02593	0.970954	1.08683	0.158273
Q62658	Peptidyl-prolyl cis-trans isomerase FKBP1A OS=Rattus norvegicus GN=Fkbp1a PE=1 SV=3	1	1	0.817814	1.06579	0.881134	1.14831	0.978262	0.788062
Q5RK19	Vacuolar-sorting protein SNF8 OS=Rattus norvegicus GN=Snf8 PE=1 SV=1	1	1	1	1.0919	1.07026	1.16862	1.08269	0.0546058
Q99J86	Attractin OS=Rattus norvegicus GN=Atrn PE=2 SV=1	1	1	1.00248	1	0.842544	0.840459	0.921371	0.139082
A3FM27	Chloride intracellular channel protein OS=Rattus norvegicus GN=Clic4 PE=2 SV=1	4	4	0.944681	0.979787	0.796413	0.826009	0.886722	0.0440651
A0A0G2K5Y1	RCG20801, isoform CRA_c OS=Rattus norvegicus GN=Vipas39 PE=1 SV=1	2	2	1.10282	1.12542	1.1816	1.20581	1.15391	0.000670293
Q66H79	Tripartite motif protein 32 OS=Rattus norvegicus GN=Trim32 PE=1 SV=1	1	1	0.851297	0.914172	0.896008	0.962185	0.905916	0.00634969
F1LVT5	RUN domain-containing 1 OS=Rattus norvegicus GN=Rundc1 PE=4 SV=2	1	1	0.838095	1.02116	0.890889	1.08549	0.958909	0.498793
F1LSP9	FGGY carbohydrate kinase domain-containing OS=Rattus norvegicus GN=Fggy PE=1 SV=1	1	1	0.845826	0.763203	1.02055	0.920863	0.887612	0.0860242
P29066	Beta-arrestin-1 OS=Rattus norvegicus GN=Arrb1 PE=1 SV=1	1	1	0.973225	1.06868	0.982374	1.07873	1.02575	0.390388
Q63068	Phosphorylated adapter RNA export protein OS=Rattus norvegicus GN=Phax PE=1 SV=2	3	3	1.04378	1.01152	0.997797	0.96696	1.00501	0.763595
Q9JI92	Syntenin-1 OS=Rattus norvegicus GN=Sdcbp PE=1 SV=1	2	2	1.12255	1.19975	1.00219	1.07112	1.0989	0.0553427
P46413	Glutathione synthetase OS=Rattus norvegicus GN=Gss PE=1 SV=1	4	4	1.10994	1.12632	0.977343	0.991761	1.05134	0.234131
F7EZ89	TBC1 domain family, member 15 OS=Rattus norvegicus GN=Tbc1d15 PE=1 SV=2	3	3	1.10408	0.997365	1.1511	1.03984	1.0731	0.0752331
D3Z9I1	Cytochrome C oxidase assembly factor 3 OS=Rattus norvegicus GN=Coa3 PE=1 SV=1	1	1	1.06971	1.08686	1.04698	1.06376	1.06683	0.000187363
B1WC70	Protein phosphatase 1, regulatory (Inhibitor) subunit 8 OS=Rattus norvegicus GN=Ppp1r8 PE=1 SV=1	2	2	1.13691	1.09396	1.14151	1.09838	1.11769	8.13048e-05
Q920P6	Adenosine deaminase OS=Rattus norvegicus GN=Ada PE=1 SV=3	1	1	1.07482	0.970677	1.02904	0.929332	1.00097	0.976839
A0A0G2QC33	Cysteine protease OS=Rattus norvegicus GN=Atg4b PE=1 SV=1	2	2	1.00308	0.97641	1.20592	1.17386	1.08982	0.174982
Q8VGC3	Voltage-dependent L-type calcium channel subunit beta-2 OS=Rattus norvegicus GN=Cacnb2 PE=1 SV=2	1	1	1.05789	0.981053	1.03289	0.957862	1.00742	0.75779
D4A9P7	BolA family member 2 OS=Rattus norvegicus GN=Bola2 PE=1 SV=1	3	3	0.998792	0.952899	0.775797	0.74015	0.86691	0.0827987
Q66H46	RCG19966 OS=Rattus norvegicus GN=Tspyl4 PE=2 SV=1	1	1	0.846535	1.01815	0.6671	0.802341	0.833532	0.0611986
P50430	Arylsulfatase B OS=Rattus norvegicus GN=Arsb PE=2 SV=2	2	2	0.971398	1.02225	1.08009	1.13663	1.05259	0.191613
G3V8I4	Syntaxin 4A (Placental), isoform CRA_a OS=Rattus norvegicus GN=Stx4 PE=1 SV=1	1	1	1.00429	0.92926	1.11814	1.03461	1.02157	0.600759
Q5FVN0	Lysophospholipid acyltransferase 5 OS=Rattus norvegicus GN=Lpcat3 PE=2 SV=1	1	1	0.938845	1.00453	0.914002	0.977949	0.958832	0.0868352
Q5HZA9	Transmembrane protein 126A OS=Rattus norvegicus GN=Tmem126a PE=2 SV=1	1	1	0.911797	1.11687	0.914823	1.12058	1.01602	0.796162
A0A096MJ11	Gasdermin D OS=Rattus norvegicus GN=Gsdmd PE=1 SV=1	1	1	0.963761	1.02253	0.991935	1.05242	1.00766	0.702924
D4A2Z8	DEAH (Asp-Glu-Ala-His) box polypeptide 36 (Predicted), isoform CRA_a OS=Rattus norvegicus GN=Dhx36 PE=1 SV=1	4	4	0.669538	0.904464	0.773056	1.0443	0.84784	0.110205
G3V6Y7	Caspase activity and apoptosis inhibitor 1 OS=Rattus norvegicus GN=Caap1 PE=1 SV=2	2	2	0.958478	0.890427	1.00484	0.933495	0.946809	0.0677541
F1M1E4	Paroxysmal nonkinesigenic dyskinesia OS=Rattus norvegicus GN=Pnkd PE=1 SV=1	1	1	1.15545	1.12974	0.965235	0.943763	1.04855	0.409187
D4A3Q3	Nuclear receptor coactivator 1 OS=Rattus norvegicus GN=Ncoa1 PE=1 SV=2	1	1	0.939156	1.01374	0.970588	1.04767	0.992788	0.772457
I7EFB0	Myelin basic protein transcript variant N (Fragment) OS=Rattus norvegicus GN=Mbp PE=2 SV=1	2	2	0.487517	0.342261	1.04475	0.733463	0.651997	0.0643186
Q5XHY0	RNA helicase OS=Rattus norvegicus GN=Ddx18 PE=1 SV=1	1	1	1.0129	1.02581	0.931751	0.94362	0.97852	0.402415
Q6AY65	Arfaptin-2 OS=Rattus norvegicus GN=Arfip2 PE=2 SV=1	1	1	1.15716	1.00116	1.08634	0.939891	1.04614	0.370357
O88763	Phosphatidylinositol 3-kinase catalytic subunit type 3 OS=Rattus norvegicus GN=Pik3c3 PE=1 SV=1	4	4	0.89698	1.05861	0.896185	1.05768	0.977364	0.644645
Q5M7T4	Protein YIPF4 OS=Rattus norvegicus GN=Yipf4 PE=2 SV=1	1	1	0.935052	0.942268	0.941848	0.949117	0.942071	9.65526e-07
A0A0H2UHT3	39S ribosomal protein L22, mitochondrial OS=Rattus norvegicus GN=Mrpl22 PE=1 SV=1	1	1	0.974215	1.00112	0.884929	0.909369	0.942408	0.0782653
A0A0G2JVZ6	Integrin subunit alpha V OS=Rattus norvegicus GN=Itgav PE=1 SV=1	1	1	1.0176	0.892473	1.1541	1.0122	1.01909	0.733282
P70705	Copper-transporting ATPase 1 OS=Rattus norvegicus GN=Atp7a PE=1 SV=1	3	3	1.04858	1.01012	1.05714	1.01837	1.03355	0.0259158
Q5XIM0	BCS1 homolog, ubiquinol-cytochrome c reductase complex chaperone OS=Rattus norvegicus GN=Bcs1l PE=1 SV=1	4	4	0.924762	0.942857	0.935453	0.953757	0.939207	5.95338e-05
A0A0G2JW12	Complement component 4A (Rodgers blood group) OS=Rattus norvegicus GN=LOC103689965 PE=1 SV=1	4	4	0.868331	0.903519	0.835153	0.868996	0.869	8.30367e-05
D3ZYI0	Grancalcin OS=Rattus norvegicus GN=Gca PE=1 SV=2	2	2	1.04092	0.921995	0.867804	0.768657	0.899844	0.127963
Q32Q88	F-box protein 22 OS=Rattus norvegicus GN=Fbxo22 PE=1 SV=1	1	1	0.878458	0.98419	0.972648	1.08972	0.981253	0.67961
A0A0G2JSQ9	Proline-, glutamic acid- and leucine-rich protein 1 OS=Rattus norvegicus GN=Pelp1 PE=1 SV=1	1	1	1.05179	1.11221	0.92416	0.977248	1.01635	0.705897
A0A0G2K556	BRCA1-A complex subunit RAP80 OS=Rattus norvegicus GN=Uimc1 PE=1 SV=1	1	1	1.09711	0.998844	1.04631	0.952591	1.02371	0.474092
D3ZDX5	Plexin B1 OS=Rattus norvegicus GN=Plxnb1 PE=1 SV=1	1	1	1.00865	0.981748	0.976744	0.950698	0.979459	0.134348
D3ZGD0	Gem (nuclear organelle)-associated protein 5 OS=Rattus norvegicus GN=Gemin5 PE=1 SV=2	1	1	0.923664	1.01527	0.87772	0.964767	0.945355	0.11155
A0A0G2JTK4	Protein phosphatase 6, regulatory subunit 1 OS=Rattus norvegicus GN=Ppp6r1 PE=1 SV=1	1	1	1.07	0.998	0.937774	0.874671	0.970111	0.500888
F1M8H2	Tryptophanyl tRNA synthetase 2 (mitochondrial) OS=Rattus norvegicus GN=Wars2 PE=1 SV=2	2	2	0.991471	1.0533	0.943205	1.00203	0.997502	0.915535
B5DFF4	VPS37C, ESCRT-I subunit OS=Rattus norvegicus GN=Vps37c PE=1 SV=1	3	3	0.912111	1.02572	0.899577	1.01163	0.96226	0.293654
D4A648	Serine/threonine kinase 4 OS=Rattus norvegicus GN=Stk4 PE=1 SV=1	3	2	1.04767	0.936047	0.998891	0.892461	0.968768	0.396209
F1LZ05	Poly [ADP-ribose] polymerase OS=Rattus norvegicus GN=Parp14 PE=1 SV=2	5	5	0.871769	1.03479	0.895812	1.06333	0.966426	0.5131
D3ZQH9	RAS p21 protein activator 4 OS=Rattus norvegicus GN=Rasa4 PE=1 SV=1	2	2	0.832858	0.989554	0.848162	1.00774	0.919578	0.130354
Q6QD51	Coiled-coil domain-containing protein 80 OS=Rattus norvegicus GN=Ccdc80 PE=1 SV=1	2	2	0.928697	0.927817	0.940285	0.939394	0.934048	1.12014e-06
F1LM60	ArfGAP with RhoGAP domain, ankyrin repeat and PH domain 1 OS=Rattus norvegicus GN=Arap1 PE=1 SV=1	2	2	0.86234	1.03147	0.912591	1.09157	0.974492	0.645701
B1WBW4	Armadillo repeat-containing protein 10 OS=Rattus norvegicus GN=Armc10 PE=1 SV=1	1	1	0.891362	1.06768	0.986207	1.18128	1.03163	0.625579
P51607	N-acylglucosamine 2-epimerase OS=Rattus norvegicus GN=Renbp PE=2 SV=2	2	2	0.989328	1.05123	1.02205	1.086	1.03715	0.121579
D3ZQ02	WD repeat domain 37 OS=Rattus norvegicus GN=Wdr37 PE=1 SV=3	1	1	0.96055	0.937615	0.966759	0.943675	0.95215	0.00043664
A0A0G2K7W2	Aldehyde dehydrogenase OS=Rattus norvegicus GN=Aldh3b1 PE=3 SV=1	2	1	0.938335	0.924974	0.926904	0.913706	0.92598	6.28007e-06
A0A0F7RQL3	Macrophage migration inhibitory factor OS=Rattus norvegicus GN=Mif PE=4 SV=1	1	1	0.784539	1.11924	0.817481	1.16624	0.971875	0.786609
Q63714	Rat GCP360 OS=Rattus norvegicus GN=Golgb1 PE=2 SV=1	46	1	0.618009	1.12701	1.14991	2.097	1.24798	0.452131
D3ZD80	General transcription factor IIIC subunit 4 OS=Rattus norvegicus GN=Gtf3c4 PE=1 SV=1	2	2	1.04988	1.08933	1.03547	1.07437	1.06226	0.00210389
Q6AXW2	RCG25684, isoform CRA_a OS=Rattus norvegicus GN=Tmod3 PE=1 SV=1	3	2	0.850862	0.994828	0.940896	1.1001	0.97167	0.606196
A1A5S2	CXXC finger 1 (PHD domain) OS=Rattus norvegicus GN=Cxxc1 PE=1 SV=1	3	3	0.977758	0.866548	1.03096	0.913696	0.94724	0.193419
Q68G38	Torsin-1A OS=Rattus norvegicus GN=Tor1a PE=1 SV=1	1	1	1.08392	1.15385	1.04227	1.10951	1.09738	0.00589846
O35867	Neurabin-1 OS=Rattus norvegicus GN=Ppp1r9a PE=1 SV=1	4	4	0.852385	0.949595	0.867216	0.966117	0.908828	0.0190661
G3V843	Prothrombin OS=Rattus norvegicus GN=F2 PE=1 SV=1	3	3	1.08568	0.942488	1.10119	0.955952	1.02133	0.628443
A0A0G2KB52	Microtubule-associated protein 7 OS=Rattus norvegicus GN=Map7 PE=1 SV=1	3	3	0.911681	0.921178	0.888889	0.898148	0.904974	1.11874e-05
Q499V0	COMM domain containing 7, isoform CRA_d OS=Rattus norvegicus GN=Commd7 PE=1 SV=1	2	2	0.962551	1.0668	0.872477	0.966972	0.9672	0.440325
D4AEK9	Coiled-coil domain-containing 6 OS=Rattus norvegicus GN=Ccdc6 PE=1 SV=3	2	2	1.00566	1.03205	1.06169	1.08955	1.04724	0.0406368
B1H230	Dual-specificity mitogen-activated protein kinase kinase 3-like OS=Rattus norvegicus GN=Map2k3 PE=1 SV=1	2	2	0.903537	1.06752	0.967853	1.14351	1.02061	0.711195
B4F7E7	Membrane palmitoylated protein 5 OS=Rattus norvegicus GN=Mpp5 PE=1 SV=1	1	1	1.10988	0.921371	1.10653	0.918593	1.01409	0.804033
A0A0G2JVA7	Eukaryotic translation initiation factor 1A OS=Rattus norvegicus GN=Eif1a PE=1 SV=1	1	1	1.11991	0.945396	1.10571	0.933404	1.02611	0.621684
Q6NX65	Programmed cell death protein 10 OS=Rattus norvegicus GN=Pdcd10 PE=2 SV=1	3	3	1.07439	0.974495	1.08827	0.987083	1.03106	0.329537
A0A0G2K5G9	Protein Red OS=Rattus norvegicus GN=Ik PE=1 SV=1	2	2	0.867754	0.925725	0.895327	0.95514	0.910986	0.00328264
A0A0G2K712	TBC1 domain family, member 5 OS=Rattus norvegicus GN=Tbc1d5 PE=1 SV=1	1	1	0.949416	1.00681	1.04834	1.11171	1.02907	0.42805
Q6Q0N0	Calsyntenin-1 OS=Rattus norvegicus GN=Clstn1 PE=1 SV=1	1	1	1.43021	1.06522	1.31996	0.983105	1.19962	0.10631
F1LSH3	Origin recognition complex subunit 3 OS=Rattus norvegicus GN=Orc3 PE=4 SV=2	2	2	0.914894	0.941489	0.834142	0.85839	0.887229	0.00387658
D4A5S9	Pre-mRNA-processing factor 39 OS=Rattus norvegicus GN=Prpf39 PE=1 SV=1	1	1	0.909007	1.0386	0.914048	1.04436	0.976505	0.554526
Q711G3	Isoamyl acetate-hydrolyzing esterase 1 homolog OS=Rattus norvegicus GN=Iah1 PE=2 SV=2	4	4	0.862069	0.904509	1.06209	1.11438	0.985762	0.822461
Q4QR75	Exosome complex component RRP45 OS=Rattus norvegicus GN=Exosc9 PE=1 SV=1	1	1	1.11195	0.958019	1.10363	0.950855	1.03111	0.509022
P62628	Dynein light chain roadblock-type 1 OS=Rattus norvegicus GN=Dynlrb1 PE=1 SV=3	2	2	0.98997	0.898696	0.951784	0.864031	0.92612	0.0381413
D4A6X3	KN motif and ankyrin repeat domains 4 OS=Rattus norvegicus GN=Kank4 PE=1 SV=1	3	3	0.888067	1.0518	0.856378	1.01427	0.95263	0.357088
M0RDI5	Mitochondrial calcium uniporter OS=Rattus norvegicus GN=Mcu PE=1 SV=1	6	6	0.997893	1.05163	0.920311	0.969874	0.984928	0.602328
A0A0G2JUQ8	Ubiquitin carboxyl-terminal hydrolase 48-like OS=Rattus norvegicus GN=Usp48 PE=1 SV=1	2	2	0.992999	0.968495	0.838424	0.817734	0.904413	0.0755873
D3ZY44	Mitochondrial ribosomal protein S2 OS=Rattus norvegicus GN=Mrps2 PE=1 SV=1	1	1	1.14132	1.0893	1.01572	0.969432	1.05394	0.207352
A0A0G2K675	Alpha-ketoglutarate-dependent dioxygenase FTO OS=Rattus norvegicus GN=Fto PE=1 SV=1	6	6	1.32321	1.11068	1.12303	0.942643	1.12489	0.159842
D3ZWF5	Transcription and mRNA export factor ENY2 OS=Rattus norvegicus GN=Eny2 PE=1 SV=1	1	1	0.839388	0.885277	0.901437	0.950719	0.894205	0.00366864
Q63186	Translation initiation factor eIF-2B subunit delta OS=Rattus norvegicus GN=Eif2b4 PE=2 SV=1	3	3	0.994048	0.962302	1.01314	0.980789	0.987571	0.290556
Q5XI86	Peptidyl-tRNA hydrolase 2 OS=Rattus norvegicus GN=Ptrh2 PE=1 SV=1	1	1	0.992	0.977	1.17119	1.15348	1.07342	0.20429
A0A023IKJ3	Transporter 2 ATP-binding cassette sub-family B OS=Rattus norvegicus GN=Tap2 PE=2 SV=1	1	1	0.835081	0.86082	0.904959	0.932851	0.883428	0.00178974
D3ZXK4	Abhydrolase domain-containing 11 OS=Rattus norvegicus GN=Abhd11 PE=1 SV=1	1	1	0.854905	0.972795	0.913656	1.03965	0.945251	0.21619
G3V997	Neuronal migration protein doublecortin OS=Rattus norvegicus GN=Dcx PE=1 SV=1	2	2	0.932065	0.807065	0.954545	0.826531	0.880052	0.0176858
D3ZAS9	DDRGK domain-containing 1 OS=Rattus norvegicus GN=Ddrgk1 PE=1 SV=1	2	2	0.948454	1.11031	0.926485	1.08459	1.01746	0.721327
Q4KM65	Cleavage and polyadenylation specificity factor subunit 5 OS=Rattus norvegicus GN=Nudt21 PE=2 SV=1	1	1	0.907958	1.1908	0.979317	1.28438	1.09061	0.343829
A0A0G2K437	Autocrine motility factor receptor OS=Rattus norvegicus GN=Amfr PE=1 SV=1	1	1	1.02797	1.06394	1.00685	1.04207	1.03521	0.0261804
B2GUZ6	Reticulon 4-interacting protein 1 OS=Rattus norvegicus GN=Rtn4ip1 PE=1 SV=1	2	2	1.08419	1.04209	1.31835	1.26717	1.17795	0.0390381
Q5I0H3	Small ubiquitin-related modifier 1 OS=Rattus norvegicus GN=Sumo1 PE=1 SV=1	1	1	0.861883	0.976682	0.971689	1.10111	0.977841	0.666302
D3ZN27	DnaJ heat shock protein family (Hsp40) member C13 OS=Rattus norvegicus GN=Dnajc13 PE=1 SV=2	4	4	0.964323	1.08919	0.895712	1.0117	0.990231	0.818211
Q4V797	Interferon-gamma-inducible GTPase Ifgga1 protein OS=Rattus norvegicus GN=RGD1309362 PE=1 SV=1	1	1	0.653293	0.932627	0.688747	0.98324	0.814477	0.0687243
Q99PK0	Pre-mRNA-splicing factor SYF1 OS=Rattus norvegicus GN=Xab2 PE=2 SV=1	2	2	0.941418	1.22405	0.862524	1.12147	1.03737	0.666577
Q5XIC2	Evolutionarily conserved signaling intermediate in Toll pathway, mitochondrial OS=Rattus norvegicus GN=Ecsit PE=1 SV=1	1	1	0.920465	0.85076	1.01879	0.941642	0.932915	0.100503
D3ZZR9	Peptidylprolyl isomerase OS=Rattus norvegicus GN=Fkbp2 PE=1 SV=1	2	2	0.837674	0.807292	1.05464	1.01639	0.929001	0.297893
Q4QQW3	Hydroxyacid-oxoacid transhydrogenase, mitochondrial OS=Rattus norvegicus GN=Adhfe1 PE=1 SV=1	1	1	0.936306	1.01592	0.883768	0.958918	0.948729	0.11024
D3ZZ94	Poly [ADP-ribose] polymerase OS=Rattus norvegicus GN=Parp10 PE=1 SV=1	1	1	1.36161	1.20997	1.17475	1.04392	1.19756	0.0232558
Q6P7Q1	BRISC and BRCA1-A complex member 2 OS=Rattus norvegicus GN=Babam2 PE=1 SV=1	2	2	0.854045	0.904087	0.879725	0.931271	0.892282	0.000622916
P04897	Guanine nucleotide-binding protein G(i) subunit alpha-2 OS=Rattus norvegicus GN=Gnai2 PE=1 SV=3	7	3	0.906796	0.957282	0.862419	0.910434	0.909233	0.00338444
D3ZLE2	Transmembrane and coiled-coil domain family 3 OS=Rattus norvegicus GN=Tmcc3 PE=1 SV=1	1	1	0.849761	0.862201	0.974753	0.989023	0.918934	0.0683984
Q5RKH5	Phosphorylase b kinase regulatory subunit OS=Rattus norvegicus GN=Phkb PE=1 SV=1	1	1	0.926483	0.918964	0.961005	0.953206	0.939915	0.00104501
Q68FY1	Nucleoporin NUP53 OS=Rattus norvegicus GN=Nup35 PE=1 SV=1	2	2	1.03269	1.04903	1.12209	1.13984	1.08591	0.0175737
B0BNM3	Sorting nexin OS=Rattus norvegicus GN=Snx9 PE=2 SV=1	1	1	1.12712	1.01318	1.07451	0.965889	1.04517	0.246936
E9PT51	DNA polymerase delta-interacting protein 2 OS=Rattus norvegicus GN=Poldip2 PE=1 SV=3	2	2	1.0295	0.994914	0.676471	0.653743	0.838657	0.15972
P21588	5'-nucleotidase OS=Rattus norvegicus GN=Nt5e PE=1 SV=1	3	3	1.15784	1.05499	1.04312	0.950459	1.0516	0.269554
Q5FVC5	Nectin cell adhesion molecule 2 OS=Rattus norvegicus GN=Nectin2 PE=1 SV=1	2	2	1.22048	0.986747	1.06744	0.863014	1.03442	0.662115
A0A0A0MY43	Activating signal cointegrator 1 complex subunit 3 OS=Rattus norvegicus GN=Ascc3 PE=1 SV=1	1	1	0.900877	0.942982	0.922731	0.965858	0.933112	0.00295785
D3Z9K9	Glycerophosphodiester phosphodiesterase domain containing 2 (Predicted), isoform CRA_a OS=Rattus norvegicus GN=Gdpd2 PE=4 SV=1	1	1	0.888608	0.922363	0.922067	0.957093	0.922532	0.00145823
A0A0G2K847	ArfGAP with GTPase domain, ankyrin repeat and PH domain 1 OS=Rattus norvegicus GN=Agap1 PE=4 SV=1	1	1	1.0084	1.04108	1.01124	1.04401	1.02618	0.0328181
O70280	WAP four-disulfide core domain protein 1 OS=Rattus norvegicus GN=Wfdc1 PE=1 SV=1	1	1	1.057	0.900251	1.10711	0.942932	1.00182	0.971066
A0A0G2K781	PPFIA-binding protein 1 OS=Rattus norvegicus GN=Ppfibp1 PE=1 SV=1	2	2	1.22173	1.09989	1.0998	0.990119	1.10289	0.0725914
M0R907	RCG60635, isoform CRA_b OS=Rattus norvegicus GN=Snrpd3 PE=1 SV=1	1	1	0.891376	1.01078	1.07715	1.22144	1.05019	0.493293
D3ZIT4	Anaphase promoting complex subunit 7 (Predicted) OS=Rattus norvegicus GN=Anapc7 PE=1 SV=1	1	1	0.848259	0.79602	0.947222	0.888889	0.870097	0.006627
Q64361	Latexin OS=Rattus norvegicus GN=Lxn PE=1 SV=1	2	2	1.07344	0.903421	1.22222	1.02864	1.05693	0.42019
Q4AE70	Histone-arginine methyltransferase CARM1 OS=Rattus norvegicus GN=Carm1 PE=1 SV=1	1	1	0.836695	0.926993	0.947769	1.05005	0.940378	0.222267
F1LTD0	G protein-coupled receptor 89B OS=Rattus norvegicus GN=Gpr89b PE=1 SV=2	3	3	0.989827	1.04171	0.958621	1.00887	0.999756	0.989265
P97603	Neogenin (Fragment) OS=Rattus norvegicus GN=Neo1 PE=1 SV=1	2	2	0.97168	1.0127	0.746997	0.778529	0.877475	0.117486
Q5XIU4	B-cell receptor-associated protein 29 OS=Rattus norvegicus GN=Bcap29 PE=1 SV=1	1	1	1.2305	1.04728	1.13399	0.965142	1.09423	0.149524
G3V907	Peroxisomal biogenesis factor 19-like OS=Rattus norvegicus GN=LOC100911356 PE=1 SV=1	2	2	0.872711	0.898352	1.00847	1.0381	0.954406	0.303928
D3ZXB9	Sorting nexin 19 OS=Rattus norvegicus GN=Snx19 PE=1 SV=2	1	1	0.948969	1.1759	0.861084	1.067	1.01324	0.853571
Q5RKG9	Eukaryotic translation initiation factor 4B OS=Rattus norvegicus GN=Eif4b PE=1 SV=1	6	6	1.04432	0.99169	1.11319	1.05709	1.05157	0.0841636
D3ZZP8	Cullin 9 OS=Rattus norvegicus GN=Cul9 PE=1 SV=2	2	2	0.922642	0.866981	0.91831	0.862911	0.892711	0.000547924
Q66HD3	Nuclear autoantigenic sperm protein OS=Rattus norvegicus GN=Nasp PE=1 SV=1	4	4	1.0456	1.10286	0.962891	1.01562	1.03174	0.319115
G3V6U9	Histone-lysine N-methyltransferase OS=Rattus norvegicus GN=Setd3 PE=1 SV=1	3	3	1.08555	1.05801	1.05043	1.02379	1.05444	0.00516993
Q4KLP0	Probable 2-oxoglutarate dehydrogenase E1 component DHKTD1, mitochondrial OS=Rattus norvegicus GN=Dhtkd1 PE=2 SV=1	3	3	0.951641	1.04577	1.00091	1.09991	1.02456	0.466993
Q3KRE3	Guanine nucleotide-binding protein subunit gamma OS=Rattus norvegicus GN=Gng10 PE=1 SV=1	1	1	0.865789	0.938596	0.850129	0.921619	0.894034	0.00254648
Q1RP74	RCG53953, isoform CRA_a OS=Rattus norvegicus GN=LOC103690005 PE=1 SV=1	3	3	1.0888	1.10521	0.952703	0.967061	1.02844	0.502
B2RZA4	RCG31866, isoform CRA_a OS=Rattus norvegicus GN=Ap1m2 PE=2 SV=1	2	1	0.96338	1.04883	0.951763	1.03618	1.00004	0.998863
Q5U211	Sorting nexin-3 OS=Rattus norvegicus GN=Snx3 PE=1 SV=1	1	1	0.902124	1.07479	0.943961	1.12464	1.01138	0.836214
P21708-2	Isoform 2 of Mitogen-activated protein kinase 3 OS=Rattus norvegicus GN=Mapk3	6	3	1.14472	0.934673	1.20021	0.979979	1.0649	0.34834
Q4VBH2	tRNA nucleotidyl transferase 1 OS=Rattus norvegicus GN=Trnt1 PE=1 SV=1	3	3	1.05153	1.00095	1.03766	0.987759	1.01948	0.242366
Q6AY02	RNA-binding motif protein 17 OS=Rattus norvegicus GN=Rbm17 PE=1 SV=1	1	1	0.929992	0.991249	1.07742	1.14839	1.03676	0.472309
D3ZAH3	Neural precursor cell-expressed, developmentally down-regulated 1 OS=Rattus norvegicus GN=Nedd1 PE=1 SV=1	1	1	0.960109	0.875793	0.940497	0.857904	0.908576	0.0100594
B5DFJ2	Fam3a protein OS=Rattus norvegicus GN=Fam3a PE=1 SV=1	1	1	0.916505	0.915534	0.825897	0.825022	0.870739	0.00259294
Q6IMA8	ADP-ribosylation factor-like 10 OS=Rattus norvegicus GN=Arl10 PE=2 SV=1	1	1	0.911818	0.866364	1.00501	0.95491	0.934525	0.069268
Q9Z1Z1	Eukaryotic translation initiation factor 2-alpha kinase 3 OS=Rattus norvegicus GN=Eif2ak3 PE=1 SV=1	1	1	0.845391	0.961348	0.916219	1.04189	0.941212	0.203307
Q5XI28	Ribonucleoprotein PTB-binding 1 OS=Rattus norvegicus GN=Raver1 PE=1 SV=1	2	2	1.16497	1.12316	1.04564	1.00811	1.08547	0.0538228
B0BNL2	Peptidyl-prolyl cis-trans isomerase OS=Rattus norvegicus GN=Pin1 PE=1 SV=1	1	1	0.836572	0.937279	0.973279	1.09044	0.959393	0.46775
B0BNB5	LOC683983 protein OS=Rattus norvegicus GN=Nup43 PE=1 SV=1	2	2	1.32178	0.891485	1.55634	1.04969	1.20482	0.213081
F1LYZ8	Protein phosphatase 1, regulatory subunit 21 OS=Rattus norvegicus GN=Ppp1r21 PE=1 SV=3	4	4	0.92	0.962667	0.895329	0.936851	0.928712	0.00237821
A0A0G2K785	Glycerol kinase OS=Rattus norvegicus GN=Gk PE=1 SV=1	1	1	1.07726	0.990342	0.992718	0.912621	0.993236	0.847213
Q5PQK1	Septin-10 OS=Rattus norvegicus GN=Sept10 PE=1 SV=1	3	2	0.899127	1.1387	0.952724	1.20658	1.04928	0.526811
Q5I0E7	Transmembrane emp24 domain-containing protein 9 OS=Rattus norvegicus GN=Tmed9 PE=1 SV=1	2	2	0.980885	0.89839	0.964392	0.883284	0.931738	0.0296373
O08769	Cyclin dependent kinase inhibitor OS=Rattus norvegicus GN=Cdkn1b PE=1 SV=1	3	3	0.948339	0.932657	0.975332	0.959203	0.953883	0.00215628
O19445	MHC class Ib antigen OS=Rattus norvegicus GN=RT1-Cl PE=3 SV=2	2	1	1.17302	1.13978	1.17302	1.13978	1.1564	3.39198e-06
Q5BK33	p55 protein OS=Rattus norvegicus GN=LOC652956 PE=2 SV=1	5	5	0.917738	0.832048	1.09621	0.993859	0.959964	0.502745
F1LUN5	Collagen type IV alpha 5 chain OS=Rattus norvegicus GN=Col4a5 PE=3 SV=3	1	1	1.02381	0.952381	1.17191	1.09015	1.05956	0.250545
A0A0G2JSR4	Signal transducer and activator of transcription OS=Rattus norvegicus GN=Stat5b PE=1 SV=1	3	3	0.944954	1.04337	0.937914	1.0356	0.990458	0.748203
D4A8F2	Ras suppressor protein 1 OS=Rattus norvegicus GN=Rsu1 PE=1 SV=3	2	2	0.953488	0.978682	0.949807	0.974903	0.96422	0.002778
Q01460	Di-N-acetylchitobiase OS=Rattus norvegicus GN=Ctbs PE=1 SV=1	2	2	1.12625	1.15431	1.02555	1.05109	1.0893	0.0261463
D4A944	Small nuclear ribonucleoprotein U5 subunit 40 OS=Rattus norvegicus GN=Snrnp40 PE=1 SV=3	1	1	0.993648	1.07895	1.04485	1.13454	1.063	0.0773735
A0A0G2K1U9	Immunity-related GTPase Q OS=Rattus norvegicus GN=Irgq PE=1 SV=1	4	4	1.04364	1.03131	0.934579	0.923534	0.983267	0.614127
Q00238	Intercellular adhesion molecule 1 OS=Rattus norvegicus GN=Icam1 PE=2 SV=1	1	1	1.04306	1.05448	1.00169	1.01266	1.02797	0.0655035
F1M7L9	Plakophilin 2 OS=Rattus norvegicus GN=Pkp2 PE=1 SV=3	2	2	1.00846	0.980263	1.00374	0.975678	0.992035	0.370576
A0A140TAF5	Chloride channel CLIC-like 1, isoform CRA_c OS=Rattus norvegicus GN=Clcc1 PE=1 SV=1	2	2	1.07302	0.998986	1.04856	0.976214	1.0242	0.317629
A0A096MKH2	Similar to RIKEN cDNA 1110059P08 OS=Rattus norvegicus GN=Vta1 PE=1 SV=1	1	1	1.00495	1.00082	1.0759	1.07149	1.03829	0.110709
D3ZLH8	Rtf1, Paf1/RNA polymerase II complex component, homolog (S. cerevisiae) OS=Rattus norvegicus GN=Rtf1 PE=1 SV=1	3	3	0.921096	1.49751	0.913509	1.48517	1.20432	0.263756
Q63357	Unconventional myosin-Id OS=Rattus norvegicus GN=Myo1d PE=1 SV=3	5	5	0.950043	1.03445	0.944349	1.02825	0.989275	0.675085
D3ZH30	mRNA-capping enzyme OS=Rattus norvegicus GN=Rngtt PE=1 SV=1	3	3	0.939419	1.03154	0.972509	1.06787	1.00283	0.924996
D4AED6	RCG21708, isoform CRA_a OS=Rattus norvegicus GN=Mettl27 PE=1 SV=1	2	2	0.954178	0.969452	0.805766	0.818665	0.887015	0.040409
A0A0G2K3S6	RNA binding motif protein 10, isoform CRA_a OS=Rattus norvegicus GN=Rbm10 PE=1 SV=1	5	4	0.804985	1.47801	0.887631	1.62975	1.20009	0.371662
Q68FX9	NAD-dependent protein deacylase sirtuin-5, mitochondrial OS=Rattus norvegicus GN=Sirt5 PE=2 SV=1	2	2	0.956903	0.956105	0.939655	0.938871	0.947884	4.47867e-05
D4A3T3	Chromobox 1 OS=Rattus norvegicus GN=Cbx1 PE=1 SV=1	2	1	0.998217	0.982175	0.946746	0.93153	0.964667	0.0617614
Q6TUH0	2',5'-phosphodiesterase 12 OS=Rattus norvegicus GN=Pde12 PE=1 SV=1	2	2	1.07544	0.940039	0.912223	0.797375	0.931268	0.274176
B0BMX3	S100 calcium binding protein A16 (Predicted), isoform CRA_a OS=Rattus norvegicus GN=S100a16 PE=1 SV=1	1	1	0.93771	0.991582	0.888357	0.939394	0.939261	0.0279958
F1LQT0	DnaJ homolog subfamily C member 25 OS=Rattus norvegicus GN=Dnajc25 PE=1 SV=1	1	1	0.972566	0.885841	1.00365	0.914155	0.944054	0.0822714
Q4FZU4	ADAMTS-like protein 4 OS=Rattus norvegicus GN=Adamtsl4 PE=2 SV=1	1	1	0.938723	0.954894	0.816432	0.830496	0.885136	0.0185567
D3ZAQ0	FUN14 domain-containing 2 OS=Rattus norvegicus GN=Fundc2 PE=1 SV=1	2	2	3.27958	1.04398	2.71639	0.864701	1.97616	0.156122
F1LYQ0	Protein S100 OS=Rattus norvegicus GN=RGD1563581 PE=3 SV=3	1	1	0.822271	0.957227	0.914684	1.06481	0.939747	0.276233
D3ZN19	Ring finger protein 121 OS=Rattus norvegicus GN=Rnf121 PE=1 SV=1	1	1	1.00741	1.038	1.00277	1.03321	1.02035	0.0625519
F1M6V6	Sparc/osteonectin, cwcv and kazal-like domains proteoglycan 1 OS=Rattus norvegicus GN=Spock1 PE=4 SV=2	2	2	1.07885	1.14327	1.15195	1.22074	1.1487	0.00217131
F1LVX1	DnaJ heat shock protein family (Hsp40) member C1 OS=Rattus norvegicus GN=Dnajc1 PE=1 SV=3	2	2	1.10385	1.12848	0.955514	0.97683	1.04117	0.383599
B2RYM8	Family with sequence similarity 210, member B OS=Rattus norvegicus GN=Fam210b PE=1 SV=1	1	1	0.900327	0.971405	1.00456	1.08387	0.990039	0.802435
Q63055	ADP-ribosylation factor-related protein 1 OS=Rattus norvegicus GN=Arfrp1 PE=2 SV=1	2	2	1.04811	1.07075	0.994628	1.01611	1.0324	0.102949
Q66H90	Bardet-Biedl syndrome 7 protein homolog OS=Rattus norvegicus GN=Bbs7 PE=2 SV=1	2	2	1.00293	1.03226	0.701778	0.722298	0.864817	0.177533
D3ZZN4	Uncharacterized protein OS=Rattus norvegicus PE=3 SV=1	1	1	1.05645	0.859319	1.08965	0.886322	0.972935	0.659695
P08644	GTPase KRas OS=Rattus norvegicus GN=Kras PE=1 SV=3	3	3	0.99908	0.841766	1.09146	0.919598	0.962975	0.515002
D4AAG8	Structural maintenance of chromosomes flexible hinge domain-containing 1 OS=Rattus norvegicus GN=Smchd1 PE=4 SV=2	4	4	0.864198	0.939095	1.00095	1.0877	0.972987	0.589196
B1H248	Vacuolar protein-sorting-associated protein 36 OS=Rattus norvegicus GN=Vps36 PE=1 SV=1	2	2	1.06992	0.942042	0.986429	0.868533	0.96673	0.459655
F1LMV9	Coronin OS=Rattus norvegicus GN=Coro2b PE=3 SV=3	2	2	0.929674	0.95283	0.86859	0.890224	0.91033	0.00325044
Q499U2	Engulfment and cell motility protein 3 OS=Rattus norvegicus GN=Elmo3 PE=2 SV=1	4	4	0.888713	0.936859	0.941472	0.992475	0.93988	0.0297548
P62966	Cellular retinoic acid-binding protein 1 OS=Rattus norvegicus GN=Crabp1 PE=1 SV=3	1	1	0.922518	0.982244	0.895067	0.953015	0.938211	0.0168811
Q5XJW2	Growth arrest and DNA damage-inducible proteins-interacting protein 1 OS=Rattus norvegicus GN=Gadd45gip1 PE=2 SV=2	2	2	0.856598	0.927536	0.816727	0.884364	0.871306	0.00148982
A9UMV9	NADH:ubiquinone oxidoreductase subunit A7 OS=Rattus norvegicus GN=Ndufa7 PE=1 SV=1	1	1	1.04437	1.08135	1.06987	1.10774	1.07583	0.0011851
F1LQE6	DNA-binding protein SMUBP-2 OS=Rattus norvegicus GN=Ighmbp2 PE=4 SV=2	1	1	0.948472	1.00349	1.01685	1.07584	1.01117	0.684276
Q4V8G6	Methyltransferase-like 3 OS=Rattus norvegicus GN=Mettl3 PE=1 SV=1	2	2	0.823052	0.8125	0.870386	0.859227	0.841291	2.74513e-05
Q923V4	F-box only protein 6 OS=Rattus norvegicus GN=Fbxo6 PE=1 SV=1	5	5	0.885693	0.976401	0.963884	1.0626	0.972145	0.471036
G3V7Z8	Poly(A) binding protein, nuclear 1, isoform CRA_a OS=Rattus norvegicus GN=Pabpn1 PE=1 SV=1	2	2	1.03442	0.944062	1.04522	0.953913	0.994404	0.839089
D4A2C6	LSM4 homolog, U6 small nuclear RNA and mRNA degradation-associated OS=Rattus norvegicus GN=Lsm4 PE=1 SV=1	2	2	0.838764	0.916458	0.85812	0.937607	0.887737	0.00302708
Q5XIB4	Ufm1-specific protease 2 OS=Rattus norvegicus GN=Ufsp2 PE=2 SV=1	4	4	0.935145	0.909728	1.01522	0.987631	0.961932	0.164599
A0A0G2K0J4	Nipped-B protein OS=Rattus norvegicus GN=Nipbl PE=1 SV=1	3	3	0.983449	0.930314	0.983449	0.930314	0.956882	0.0307144
E9PTK4	Threonine synthase-like 1 OS=Rattus norvegicus GN=Thnsl1 PE=1 SV=1	2	2	1.19275	0.894563	1.32844	0.99633	1.10302	0.330629
B2RZ96	LOC689226 protein OS=Rattus norvegicus GN=Ube2r2 PE=1 SV=1	1	1	0.937447	1.03719	0.967714	1.07068	1.00326	0.91886
P58405-2	Isoform 2 of Striatin-3 OS=Rattus norvegicus GN=Strn3	2	1	1.04007	1.19478	0.915505	1.05168	1.05051	0.410565
D3ZF21	GPRIN family member 3 OS=Rattus norvegicus GN=Gprin3 PE=1 SV=2	2	2	1.00178	0.990196	0.944538	0.933613	0.967532	0.100639
Q641Z2	Tyrosine-protein phosphatase non-receptor type 9 OS=Rattus norvegicus GN=Ptpn9 PE=2 SV=1	2	2	1.04156	1.05705	1	1.01487	1.02837	0.0694769
Q6IRK3	Syndecan OS=Rattus norvegicus GN=Sdc2 PE=1 SV=1	1	1	1.10586	1.06372	0.986251	0.948671	1.02613	0.492767
B5DFG9	Pik3ap1 protein OS=Rattus norvegicus GN=Pik3ap1 PE=2 SV=1	2	2	1.0499	1.16528	0.878261	0.974783	1.01706	0.787904
P27867	Sorbitol dehydrogenase OS=Rattus norvegicus GN=Sord PE=1 SV=4	4	4	0.964987	1.07173	0.951178	1.0564	1.01107	0.732188
F1LRZ9	RUN domain-containing 3A OS=Rattus norvegicus GN=Rundc3a PE=1 SV=1	2	2	0.932854	0.964828	1.0069	1.04142	0.9865	0.590656
Q63190	Emerin OS=Rattus norvegicus GN=Emd PE=1 SV=1	1	1	0.981818	0.892641	0.905028	0.822825	0.900578	0.0224332
Q4FZU0	Acid phosphatase 6, lysophosphatidic OS=Rattus norvegicus GN=Acp6 PE=1 SV=1	1	1	0.995857	1.09445	1.03176	1.13391	1.06399	0.0841841
Q6AXY8	Dehydrogenase/reductase (SDR family) member 1 OS=Rattus norvegicus GN=Dhrs1 PE=1 SV=1	1	1	1.08779	1.21656	1.11578	1.24786	1.167	0.00495574
G3V9K3	Coxsackie virus and adenovirus receptor-like 1 OS=Rattus norvegicus GN=LOC103690070 PE=4 SV=1	2	2	0.912796	0.963981	0.925072	0.976945	0.944699	0.0112187
[truncated: 2,722 more rows]

## Sheet: Insus
Uniprot accession	Protein description	Peptides	Unique peptides	119/113 ratio	121/114 ratio	119/113 ratio	121/114 ratio	Average ratio	P-value
[truncated: 3,601 more rows]
